# Supplementary material for: Interaction Structure and Affinity of Zwitterionic Amino Acids with Important Metal Cations (Cd2+, Cu2+, Fe3+, Hg2+, Mn2+, Ni2+ and Zn2+) in Aqueous Solution: A Theoretical Study
Source: MDPI journal article supplement (doi:10.3390/molecules27082407), 2022-04-08
Supplement: s1 [file s1]

## Supporting Information

*Xinning Liu<sup>1</sup>, Menghan Wu<sup>2</sup>, Chenchen Li<sup>5</sup>, Peng Yu<sup>2</sup>, Shanshan Feng<sup>3</sup>, Yanwei Li<sup>1, 4\*</sup>,  
Qingzhu Zhang<sup>1</sup>*

<sup>1</sup> Environment Research Institute, Shandong University, Qingdao 266237, P. R. China.

<sup>2</sup> State Key Joint Laboratory of Environmental Simulation and Pollution Control,  
School of Environment, Tsinghua University, Beijing 100084, P.R. China.

<sup>3</sup> School of Chemistry and Chemical Engineering, Shandong University, Jinan 250100,  
P. R. China.

<sup>4</sup> Shenzhen Research Institute, Shandong University, Shenzhen 518057, P.R. China.

<sup>5</sup> School of Management, Ocean University of China, Qingdao 266101, P. R. China.

---

\*Corresponding author: Tel: +86-0532-58631990; E-mail: [lyw@sdu.edu.cn](mailto:lyw@sdu.edu.cn)

## **Supplementary material contains following:**

**Figure S1.** The optimized structures of [alkaline/aromatic AA-metal cation] complexes.

**Figure S2.** The optimized structures of [AA-metal cation] complexes, AA=Asn (a), Gln (b), Thr (c), Met (d), Pro (e).

**Figure S3.** The optimized structures of [AA-metal cation] complexes, AA= Gly (a), Ala (b), Val (c), Leu (d), and Ile (e).

**Figure S4.** The 20 types of [AA-metal cation] complexes binding energy and Mullikan charge of metal cations.

**Table S1.** The relative Gibbs free energy ( $\Delta G$ ) of AAs-metal cations structures.

**Text S1.** The cartesian coordinates information of converged conformations.



## FIGURES.

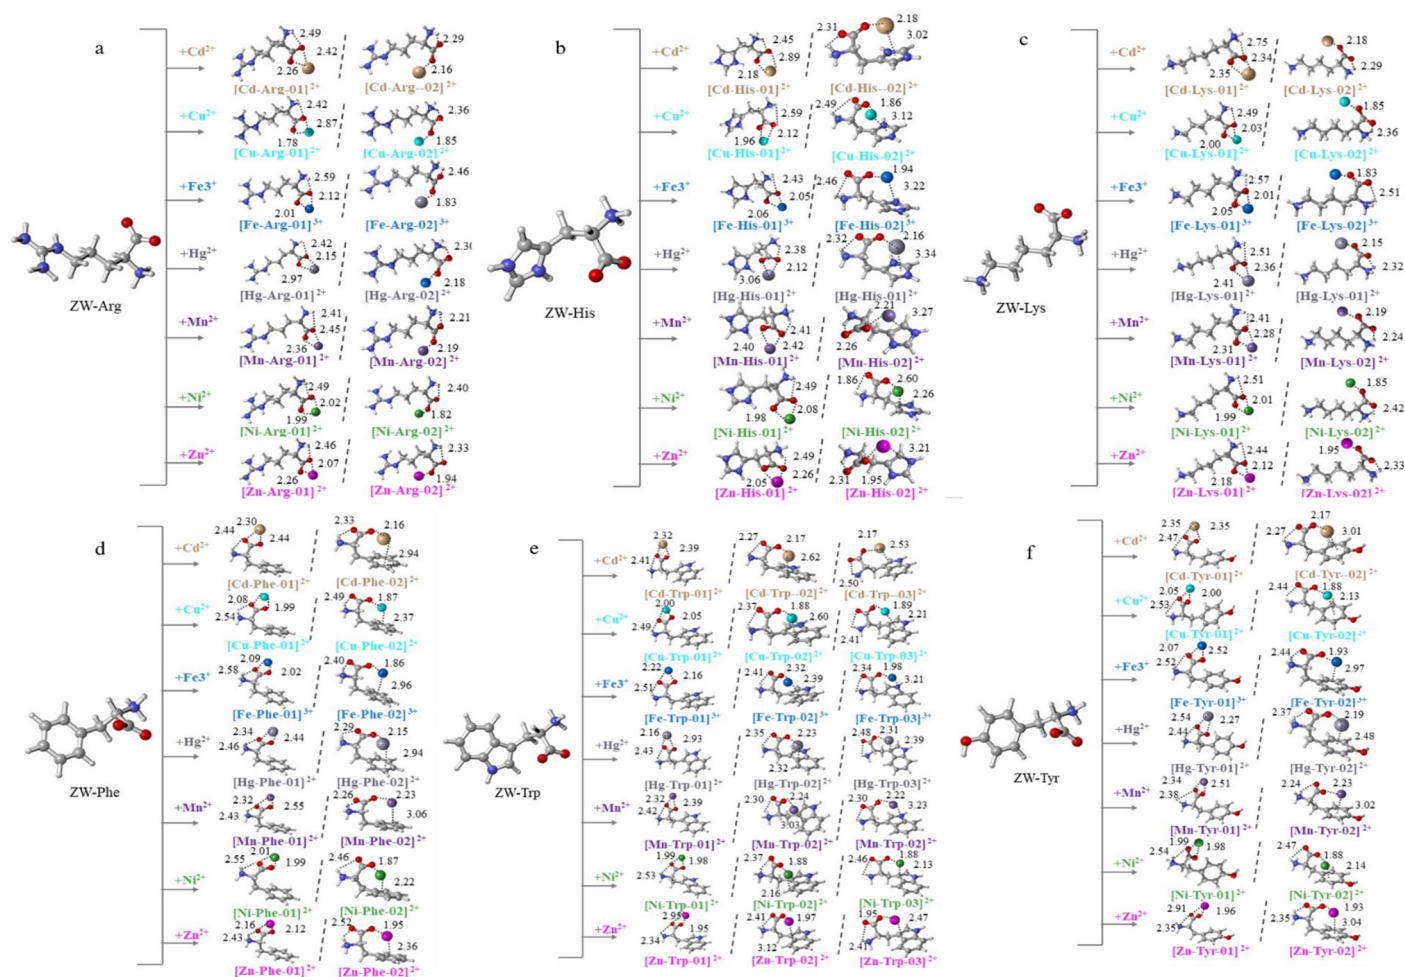

Figure S1. The optimized structures of [alkaline/aromatic AA-metal cation] complexes. AA=Arg (a), His (b), Lys (c), Phe (d), Trp (e), Tyr (f); the numbers in the figure indicated the hydrogen bond length in complex molecule, and the distance between the metal cation and the interacting atom; the length in Å

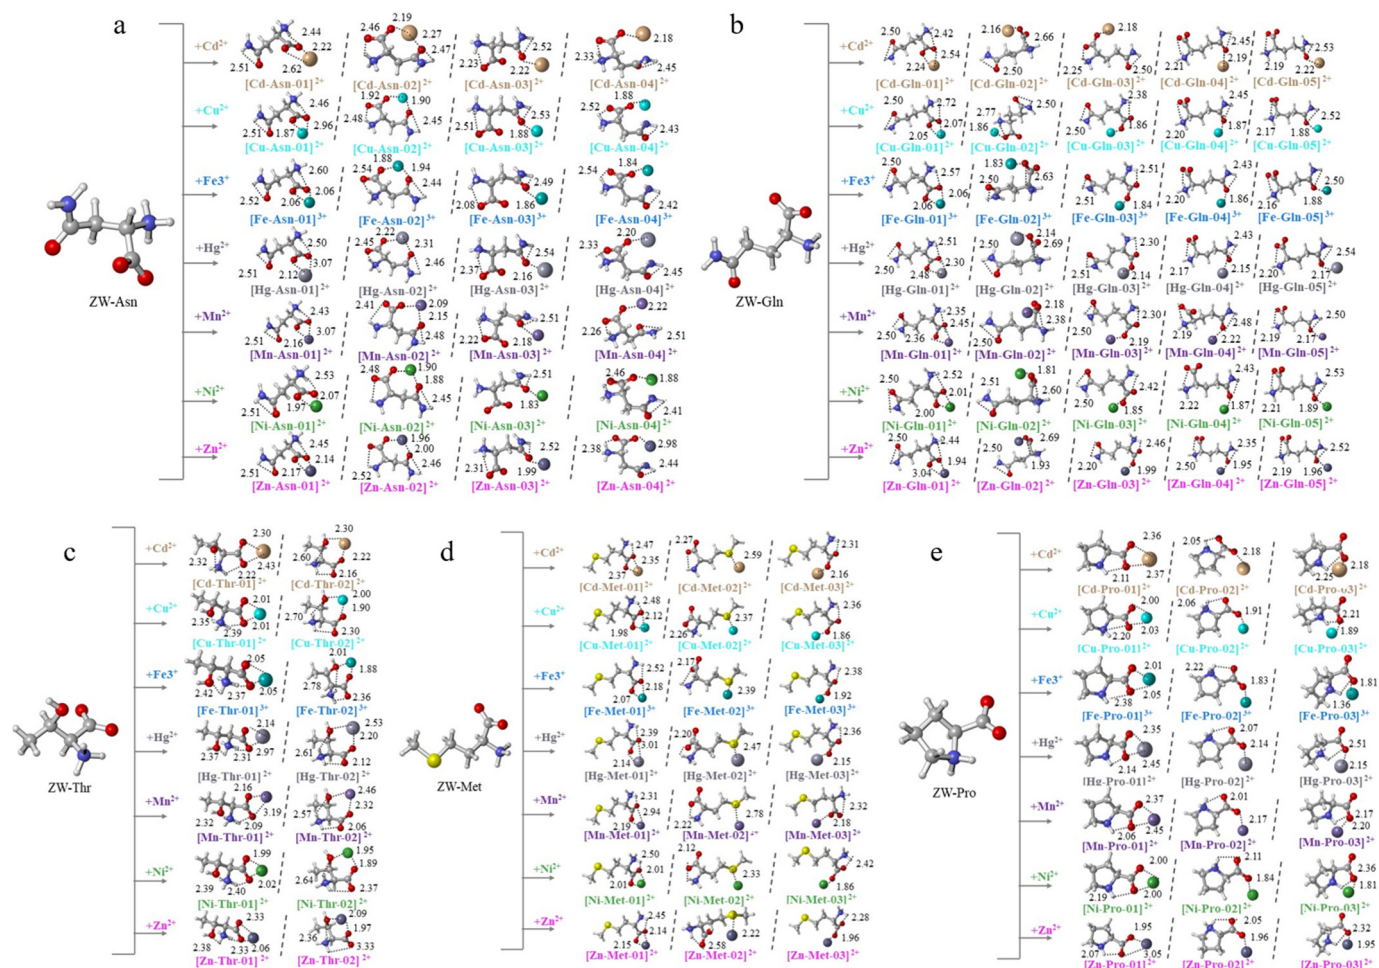

**Figure S2.** The optimized structures of [AA-metal cation] complexes, AA=Asn (a), Gln (b), Thr (c), Met (d), Pro (e). The numbers in the figure indicated the hydrogen bond length in complex molecule, and the distance between the metal cation and the interacting atom; the length in Å.

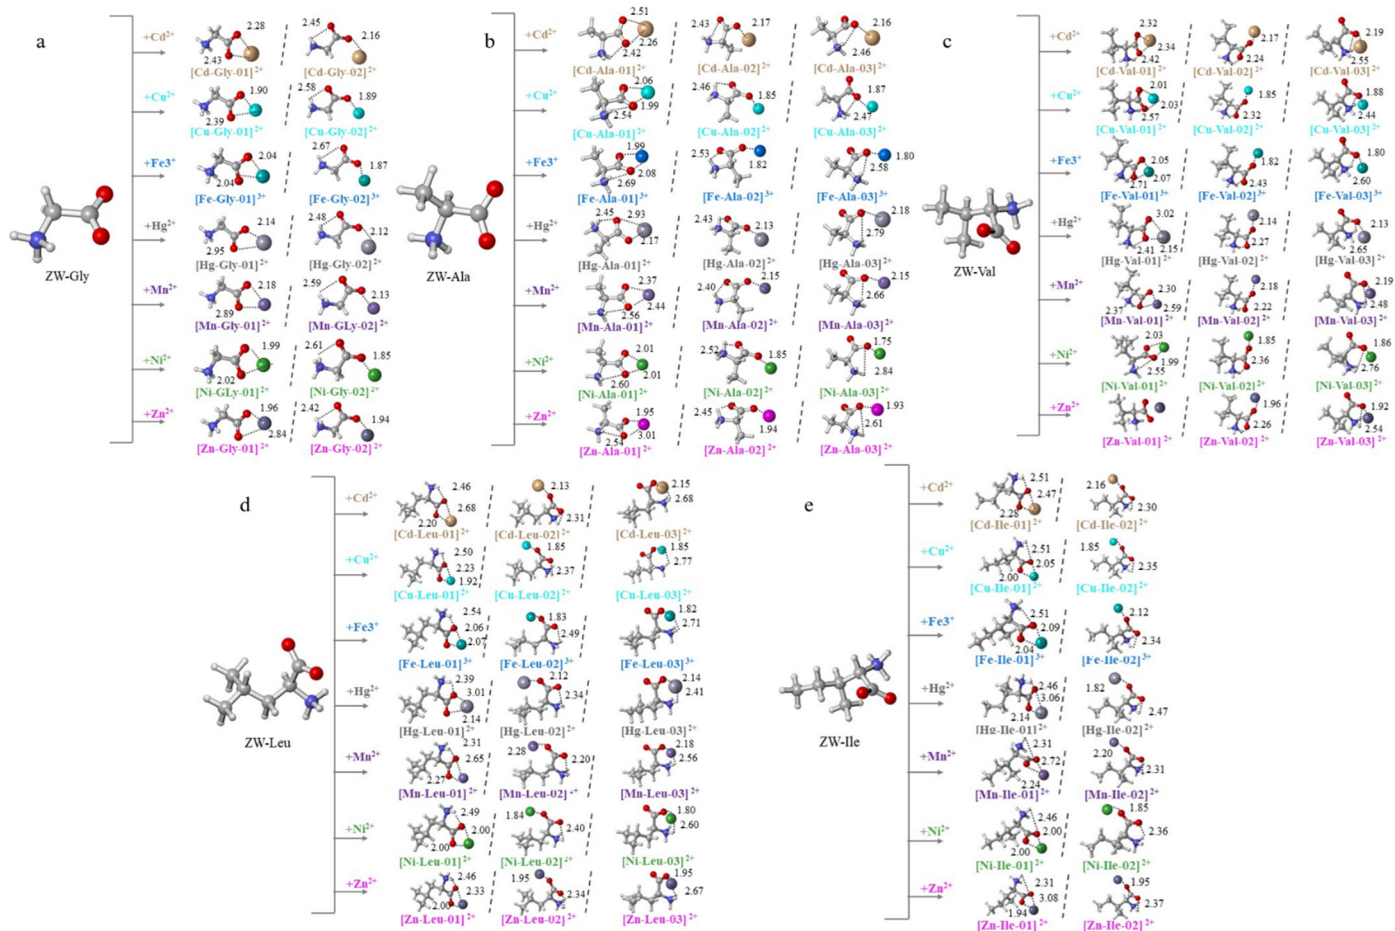

**Figure S3.** The optimized structures of [AA-metal cation] complexes, AA= Gly (a), Ala (b), Val (c), Leu (d), and Ile (e). The length in Å.



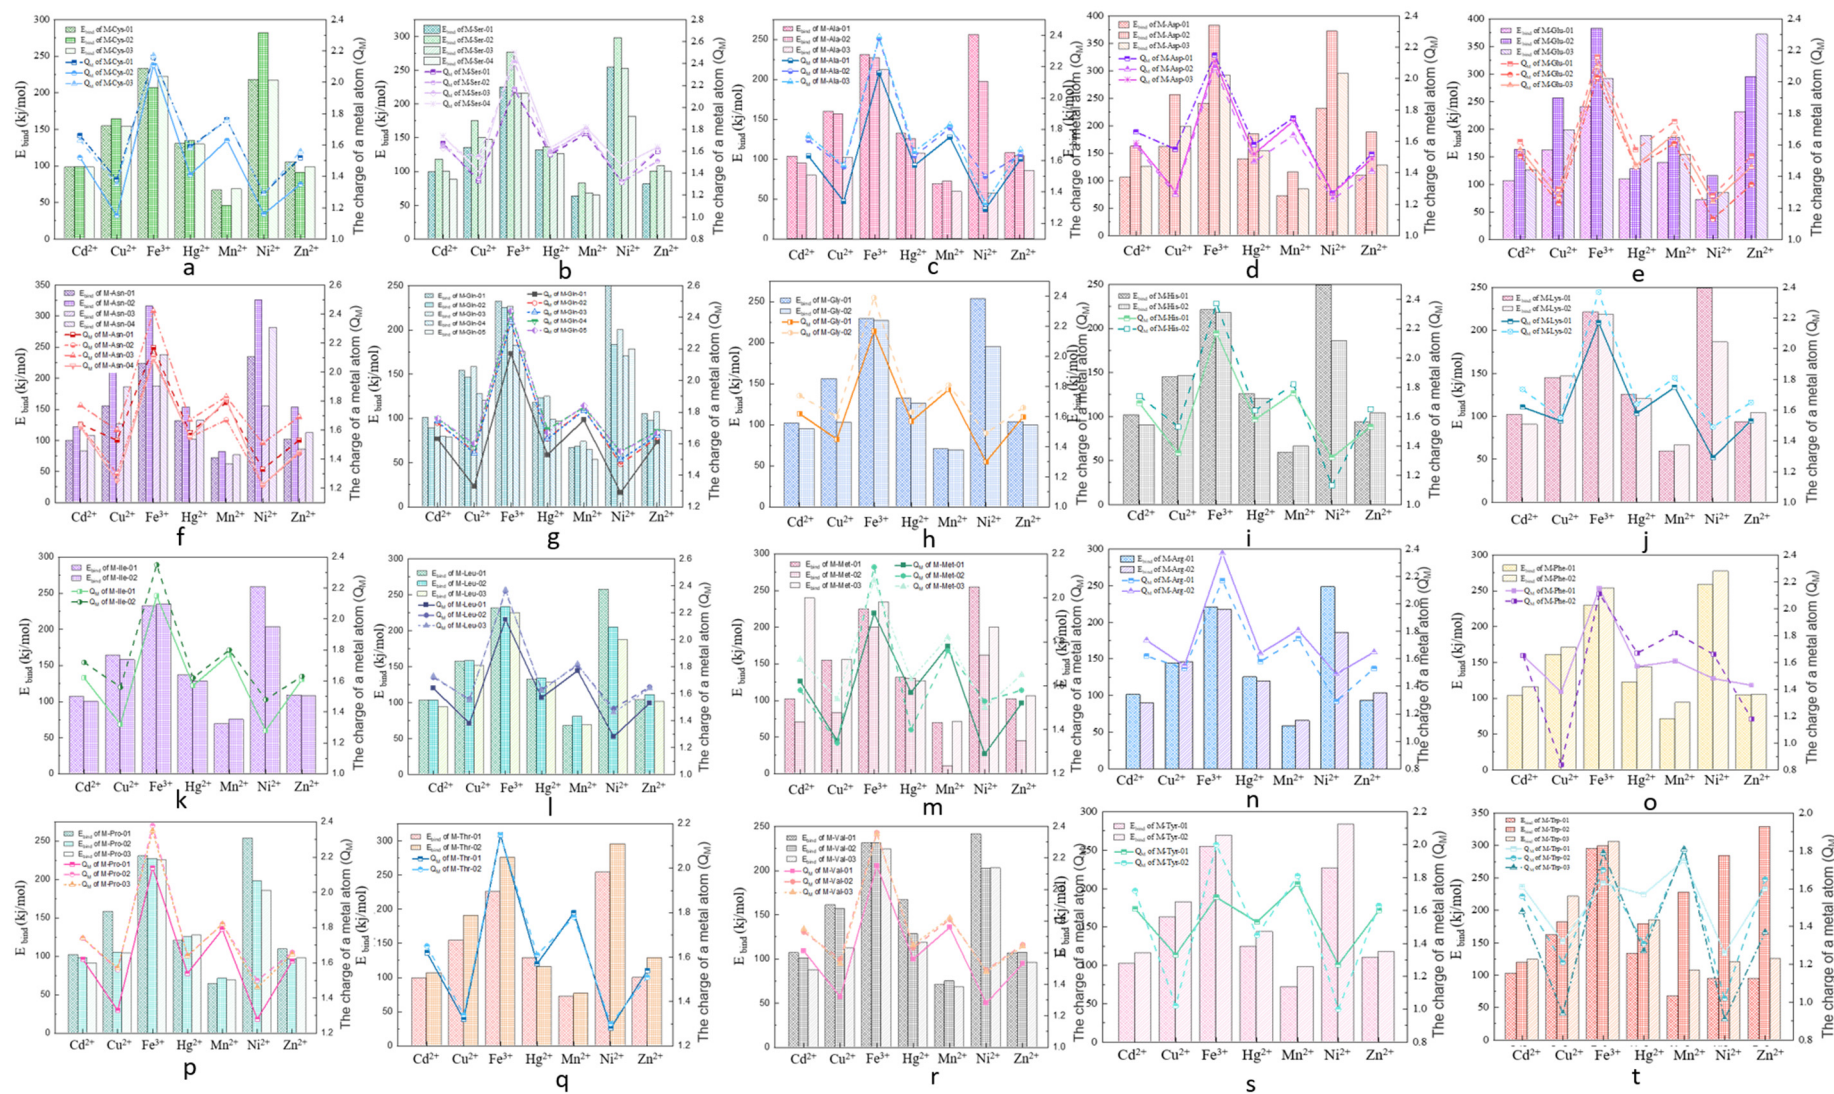

Figure S4. The 20 types of [AA-metal cation] complexes binding energy and Mulliken charge of metal cations.

## TABLES

**Table S1. The relative Gibbs free energy ( $\Delta G$ ) of AAs-metal cations structures.**

| Complexes | $\Delta G$ (kJ/mol) | Complexes | $\Delta G$ (kJ/mol) | Complexes | $\Delta G$ (kJ/mol) |
|-----------|---------------------|-----------|---------------------|-----------|---------------------|
| Cd-Asp-01 | 44.78               | Fe-Glu-02 | 59.91               | Cd-His-01 | 0                   |
| Cd-Asp-02 | 0                   | Fe-Glu-03 | 0                   | Cd-His-02 | 1.47                |
| Cd-Asp-03 | 24.04               | Hg-Glu-01 | 60.01               | Cu-His-01 | 0                   |
| Cu-Asp-01 | 77.33               | Hg-Glu-02 | 0                   | Cu-His-02 | 10.63               |
| Cu-Asp-02 | 0                   | Hg-Glu-03 | 35.5                | Fe-His-01 | 0                   |
| Cu-Asp-03 | 49.21               | Mn-Glu-01 | 50.78               | Fe-His-02 | 13.17               |
| Fe-Asp-01 | 127.56              | Mn-Glu-02 | 0                   | Mn-His-01 | 0                   |
| Fe-Asp-02 | 0                   | Mn-Glu-03 | 31.83               | Mn-His-02 | 17.45               |
| Fe-Asp-03 | 81.74               | Ni-Glu-01 | 135.48              | Ni-His-01 | 0                   |
| Mn-Asp-01 | 39.8                | Ni-Glu-02 | 0                   | Ni-His-02 | 0.63                |
| Mn-Asp-02 | 0                   | Ni-Glu-03 | 87.12               | Zn-His-01 | 0                   |
| Mn-Asp-03 | 26.54               | Zn-Glu-01 | 85.69               | Zn-His-02 | 11.45               |
| Ni-Asp-01 | 132.83              | Zn-Glu-02 | 0                   | Hg-His-01 | 0                   |
| Ni-Asp-02 | 0                   | Zn-Glu-03 | 55.18               | Hg-His-02 | 2.19                |
| Asp-Ni-03 | 68.42               | Cd-Arg-01 | 0                   | Cd-Lys-01 | 0                   |
| Zn-Asp-01 | 64.76               | Cd-Arg-02 | 2.87                | Cd-Lys-02 | 3.81                |
| Zn-Asp-02 | 0                   | Cu-Arg-01 | 0                   | Cu-Lys-01 | 0                   |
| Zn-Asp-03 | 44.9                | Cu-Arg-02 | 0.19                | Cu-Lys-02 | 2.8                 |
| Hg-Asp-01 | 32.8                | Fe-Arg-01 | 0                   | Fe-Lys-01 | 0                   |
| Hg-Asp-02 | 0                   | Fe-Arg-02 | 2.19                | Fe-Lys-02 | 4.77                |
| Cd-Asp-03 | 15.68               | Mn-Arg-01 | 0                   | Mn-Lys-01 | 0                   |
| Cd-Glu-01 | 57.1                | Mn-Arg-02 | 8.95                | Mn-Lys-02 | 11.31               |
| Cd-Glu-02 | 0                   | Ni-Arg-01 | 0                   | Ni-Lys-01 | 0                   |
| Cd-Glu-03 | 28.96               | Ni-Arg-02 | 63.13               | Ni-Lys-02 | 52.44               |
| Cu-Glu-01 | 102.2               | Zn-Arg-01 | 0                   | Zn-Lys-01 | 0                   |
| Cu-Glu-02 | 0                   | Zn-Arg-02 | 8.02                | Zn-Lys-02 | 1.7                 |
| Cu-Glu-03 | 57.54               | Hg-Arg-01 | 0                   | Hg-Lys-01 | 0                   |
| Fe-Glu-01 | 59.91               | Hg-Arg-02 | 6.77                | Hg-Lys-02 | 1.53                |
| Cd-Cys-01 | 10.2                | Mn-Ser-01 | 22.75               | Hg-Trp-01 | 23.84               |
| Cd-Cys-02 | 17.03               | Mn-Ser-02 | 0                   | Hg-Trp-02 | 0                   |
| Cd-Cys-03 | 0                   | Mn-Ser-03 | 7.5                 | Hg-Trp-03 | 4.43                |
| Cu-Cys-01 | 9.11                | Mn-Ser-04 | 149.77              | Cd-Phe-01 | 1.96                |
| Cu-Cys-02 | 3.6                 | Ni-Ser-01 | 44.17               | Cd-Phe-02 | 0                   |
| Cu-Cys-03 | 0                   | Ni-Ser-02 | 0                   | Cu-Phe-01 | 3.12                |
| Fe-Cys-01 | 0.94                | Ni-Ser-03 | 32.82               | Cu-Phe-02 | 0                   |
| Fe-Cys-02 | 32.49               | Ni-Ser-04 | 117.11              | Cu-Phe-01 | 3.12                |

**Table S1. continuous: The relative Gibbs free energy ( $\Delta G$ ) of AAs-metal cations structures.**

|           |        |           |       |           |       |
|-----------|--------|-----------|-------|-----------|-------|
| Fe-Cys-03 | 0      | Zn-Ser-01 | 12.41 | Cu-Phe-02 | 0     |
| Mn-Cys-01 | 13.97  | Zn-Ser-02 | 0     | Fe-Phe-01 | 19.89 |
| Mn-Cys-02 | 42.32  | Zn-Ser-03 | 7.63  | Fe-Phe-02 | 0     |
| Mn-Cys-03 | 0      | Zn-Ser-04 | 37.22 | Mn-Phe-01 | 16.85 |
| Ni-Cys-01 | 64.19  | Hg-Ser-01 | 11.18 | Mn-Phe-02 | 0     |
| Ni-Cys-02 | 0      | Hg-Ser-02 | 0     | Ni-Phe-01 | 12.96 |
| Ni-Cys-03 | 54.02  | Hg-Ser-03 | 6.38  | Ni-Phe-02 | 0     |
| Zn-Cys-01 | 6.48   | Hg-Ser-04 | 38.38 | Zn-Phe-01 | 0     |
| Zn-Cys-02 | 28.76  | Cd-Trp-01 | 7.63  | Zn-Phe-02 | 10.05 |
| Zn-Cys-03 | 0      | Cd-Trp-02 | 0     | Hg-Phe-01 | 5.8   |
| Hg-Cys-01 | 10.99  | Cd-Trp-03 | 6     | Hg-Phe-02 | 0     |
| Hg-Cys-02 | 12.17  | Cu-Trp-01 | 32.57 | Cd-Tyr-01 | 2.68  |
| Hg-Cys-03 | 0      | Cu-Trp-02 | 19.73 | Cd-Tyr-02 | 0     |
| Cd-Ser-01 | 12.63  | Cu-Trp-03 | 0     | Cu-Tyr-01 | 11.14 |
| Cd-Ser-02 | 0      | Fe-Trp-01 | 15.79 | Cu-Tyr-02 | 0     |
| Cd-Ser-03 | 3.15   | Fe-Trp-02 | 10    | Fe-Tyr-01 | 14.94 |
| Cd-Ser-04 | 33.96  | Fe-Trp-03 | 0     | Fe-Tyr-02 | 0     |
| Cu-Ser-01 | 36.73  | Mn-Trp-01 | 24.28 | Mn-Tyr-01 | 21.48 |
| Cu-Ser-02 | 0      | Mn-Trp-02 | 0     | Mn-Tyr-02 | 0     |
| Cu-Ser-03 | 25.66  | Mn-Trp-03 | 1.92  | Ni-Tyr-01 | 55.15 |
| Cu-Ser-04 | 48.99  | Ni-Trp-01 | 74.58 | Ni-Tyr-02 | 0     |
| Fe-Ser-01 | 42.17  | Ni-Trp-02 | 29.86 | Zn-Tyr-01 | 0     |
| Fe-Ser-02 | 0      | Ni-Trp-03 | 0     | Zn-Tyr-02 | 0.1   |
| Fe-Ser-03 | 33.65  | Zn-Trp-01 | 1.68  | Hg-Tyr-01 | 1.51  |
| Fe-Ser-04 | 54.65  | Zn-Trp-02 | 0     | Hg-Tyr-02 | 0     |
| Fe-Ser-04 | 54.65  | Zn-Trp-03 | 12.94 | Cd-Asn-01 | 14.68 |
| Cd-Asn-02 | 0      | Cu-Gln-04 | 27    | Fe-Thr-01 | 32.44 |
| Cd-Asn-03 | 33.53  | Cu-Gln-05 | 31.04 | Cd-Thr-01 | 0     |
| Cd-Asn-04 | 15.39  | Cd-Gln-02 | 15.88 | Cd-Thr-02 | 2.82  |
| Cu-Asn-01 | 49.45  | Cd-Gln-03 | 4.03  | Cu-Thr-01 | 21.14 |
| Cu-Asn-02 | 0      | Cd-Gln-04 | 21.66 | Cu-Thr-02 | 0     |
| Cu-Asn-03 | 79.6   | Cd-Gln-05 | 24.46 | Fe-Thr-02 | 0     |
| Cu-Asn-04 | 43.62  | Cu-Gln-01 | 4.88  | Hg-Thr-01 | 0     |
| Fe-Asn-01 | 86.86  | Cu-Gln-02 | 15.97 | Hg-Thr-02 | 19.32 |
| Fe-Asn-02 | 0      | Cu-Gln-03 | 0     | Mn-Thr-01 | 0.25  |
| Fe-Asn-03 | 117.58 | Cu-Gln-04 | 27    | Mn-Thr-02 | 0     |
| Fe-Asn-04 | 91.08  | Cu-Gln-05 | 31.04 | Ni-Thr-01 | 27.36 |
| Hg-Asn-01 | 13.7   | Fe-Gln-01 | 2.08  | Ni-Thr-02 | 0     |
| Hg-Asn-02 | 0      | Fe-Gln-02 | 7.08  | Zn-Thr-01 | 9.49  |
| Hg-Asn-03 | 44.1   | Fe-Gln-03 | 0     | Zn-Thr-02 | 0     |
| Hg-Asn-04 | 22.69  | Fe-Gln-04 | 39.44 | Cd-Met-01 | 0     |

**Table S1. continuous: The relative Gibbs free energy ( $\Delta G$ ) of AAs-metal cations structures.**

|           |        |           |        |           |       |
|-----------|--------|-----------|--------|-----------|-------|
| Mn-Asn-01 | 6.28   | Fe-Gln-05 | 42.75  | Cd-Met-02 | 7.47  |
| Mn-Asn-02 | 0      | Hg-Gln-01 | 1.43   | Cd-Met-03 | 24.71 |
| Mn-Asn-03 | 19.32  | Hg-Gln-02 | 12.3   | Cu-Met-01 | 0     |
| Mn-Asn-04 | 3.2    | Hg-Gln-03 | 0      | Cu-Met-02 | 3.48  |
| Ni-Asn-01 | 89.07  | Hg-Gln-04 | 21.93  | Cu-Met-03 | 53.55 |
| Ni-Asn-02 | 0      | Hg-Gln-05 | 22.93  | Fe-Met-01 | 0.48  |
| Ni-Asn-03 | 164.21 | Mn-Gln-01 | 8.06   | Fe-Met-02 | 0     |
| Ni-Asn-04 | 60.91  | Mn-Gln-02 | 8.59   | Fe-Met-03 | 14.82 |
| Zn-Asn-01 | 47.01  | Mn-Gln-03 | 0      | Hg-Met-01 | 0     |
| Zn-Asn-02 | 0      | Mn-Gln-04 | 13.87  | Hg-Met-02 | 10.1  |
| Zn-Asn-03 | 59.14  | Mn-Gln-05 | 19.59  | Hg-Met-03 | 38.38 |
| Zn-Asn-04 | 47.69  | Ni-Gln-01 | 0      | Mn-Met-01 | 4.11  |
| Cd-Gln-01 | 0      | Ni-Gln-02 | 70.24  | Mn-Met-02 | 0     |
| Cd-Gln-02 | 15.88  | Ni-Gln-03 | 52.12  | Mn-Met-03 | 14.19 |
| Cd-Gln-03 | 4.03   | Ni-Gln-04 | 78.53  | Ni-Met-01 | 0     |
| Cd-Gln-04 | 21.66  | Ni-Gln-05 | 66.6   | Ni-Met-02 | 81.78 |
| Cd-Gln-05 | 24.46  | Zn-Gln-01 | 0.76   | Ni-Met-03 | 52.19 |
| Cu-Gln-01 | 4.88   | Zn-Gln-02 | 13.71  | Zn-Met-01 | 0     |
| Cu-Gln-02 | 15.97  | Zn-Gln-03 | 0      | Zn-Met-02 | 5.41  |
| Cu-Gln-03 | 0      | Zn-Gln-04 | 18.35  | Zn-Met-03 | 25.96 |
| Cd-Gln-01 | 0      | Zn-Gln-05 | 21.53  |           |       |
| Cd-Val-01 | 0      | Cu-Ala-01 | 0      | Fe-Leu-01 | 5.86  |
| Cd-Val-02 | 6.13   | Cu-Ala-02 | 3.48   | Fe-Leu-02 | 0     |
| Cd-Val-03 | 18.58  | Cu-Ala-03 | 53.55  | Fe-Leu-03 | 15.01 |
| Cu-Val-01 | 1.39   | Fe-Ala-01 | 0.48   | Hg-Leu-01 | 0     |
| Cu-Val-02 | 0      | Fe-Ala-02 | 0      | Hg-Leu-02 | 3.67  |
| Cu-Val-03 | 44.53  | Fe-Ala-03 | 14.82  | Hg-Leu-03 | 17.09 |
| Fe-Val-01 | 4.14   | Hg-Ala-01 | 0      | Mn-Leu-01 | 11.2  |
| Fe-Val-02 | 0      | Hg-Ala-02 | 10.1   | Mn-Leu-02 | 0     |
| Fe-Val-03 | 10.09  | Hg-Ala-03 | 38.38  | Mn-Leu-03 | 12.51 |
| Hg-Val-01 | 0      | Mn-Ala-01 | 4.11   | Ni-Leu-01 | 0     |
| Hg-Val-02 | 10.72  | Mn-Ala-02 | 0      | Ni-Leu-02 | 52.14 |
| Hg-Val-03 | 23.89  | Mn-Ala-03 | 14.19  | Ni-Leu-03 | 73.19 |
| Mn-Val-01 | 8.3    | Ni-Ala-01 | 0      | Zn-Leu-01 | 5.9   |
| Mn-Val-02 | 0      | Ni-Ala-02 | 56.55  | Zn-Leu-02 | 0     |
| Mn-Val-03 | 8.45   | Ni-Ala-03 | 218.72 | Zn-Leu-03 | 12.55 |
| Ni-Val-01 | 0      | Zn-Ala-01 | 0      | Cd-Pro-01 | 0     |
| Ni-Val-02 | 37.15  | Zn-Ala-02 | 5.41   | Cd-Pro-02 | 5.48  |
| Ni-Val-03 | 38.5   | Zn-Ala-03 | 25.96  | Cd-Pro-03 | 15.41 |
| Zn-Val-01 | 2.97   | Cd-Gly-01 | 0      | Cu-Pro-01 | 0     |
| Zn-Val-02 | 0      | Cd-Gly-02 | 11.73  | Cu-Pro-02 | 44.59 |

**Table S1. continuous: The relative Gibbs free energy ( $\Delta G$ ) of AAs-metal cations structures.**

|           |       |           |       |           |       |
|-----------|-------|-----------|-------|-----------|-------|
| Zn-Val-03 | 12.45 | Cu-Gly-01 | 0     | Cu-Pro-03 | 51    |
| Cd-Ile-01 | 0     | Cu-Gly-02 | 51.2  | Fe-Pro-01 | 4     |
| Cd-Ile-02 | 4.61  | Fe-Gly-01 | 1.66  | Fe-Pro-02 | 0     |
| Cu-Ile-01 | 0     | Fe-Gly-02 | 0     | Fe-Pro-03 | 12.48 |
| Cu-Ile-02 | 0.44  | Hg-Gly-01 | 0     | Hg-Pro-01 | 0.84  |
| Fe-Ile-01 | 6.12  | Hg-Gly-02 | 12.22 | Hg-Pro-02 | 0     |
| Fe-Ile-02 | 0     | Mn-Gly-01 | 1.11  | Hg-Pro-03 | 10.51 |
| Hg-Ile-01 | 0     | Mn-Gly-02 | 0     | Mn-Pro-01 | 7.48  |
| Hg-Ile-02 | 13.77 | Ni-Gly-01 | 0     | Mn-Pro-02 | 0     |
| Mn-Ile-01 | 6.87  | Ni-Gly-02 | 56.87 | Mn-Pro-03 | 6.56  |
| Mn-Ile-02 | 0     | Zn-Gly-01 | 0     | Ni-Pro-01 | 0     |
| Ni-Ile-01 | 0     | Zn-Gly-02 | 5.25  | Ni-Pro-02 | 53.08 |
| Ni-Ile-02 | 55.89 | Cd-Leu-01 | 0     | Ni-Pro-03 | 74.43 |
| Zn-Ile-01 | 0     | Cd-Leu-02 | 3.89  | Zn-Pro-01 | 0     |
| Zn-Ile-02 | 2.34  | Cd-Leu-03 | 15.82 | Zn-Pro-02 | 15.13 |
| Cd-Ala-01 | 0     | Cu-Leu-01 | 5.97  | Zn-Pro-03 | 19.37 |
| Cd-Ala-02 | 7.47  | Cu-Leu-02 | 0     |           |       |
| Cd-Ala-03 | 24.71 | Cu-Leu-03 | 15.44 |           |       |

---



## Text S1. The cartesian coordinates information of converged conformations.

Molecule: Cd-ASP-01

|    |             |             |             |
|----|-------------|-------------|-------------|
| N  | -1.39007700 | 2.52559900  | -0.09583400 |
| H  | -1.04251200 | 2.59623700  | -1.05494900 |
| H  | -0.70411200 | 2.97219500  | 0.51554200  |
| H  | -2.27329500 | 3.03624200  | -0.03171000 |
| C  | -1.59575000 | 1.09106100  | 0.29054900  |
| H  | -1.97964300 | 1.09673300  | 1.30846500  |
| C  | -2.60710500 | 0.44278500  | -0.64604700 |
| C  | -0.25630000 | 0.35963800  | 0.28592200  |
| H  | -3.44555000 | 1.13292500  | -0.77788900 |
| H  | -2.16039900 | 0.27043800  | -1.62477100 |
| C  | -3.20483900 | -0.86306500 | -0.09690100 |
| O  | 0.76765100  | 1.04857400  | -0.05549400 |
| O  | -3.50616200 | -0.89462000 | 1.12435100  |
| O  | -3.39779600 | -1.78812700 | -0.92798000 |
| O  | -0.23443600 | -0.83735500 | 0.59643600  |
| Cd | 2.46429100  | -0.31654700 | -0.05340600 |

Molecule: Cd-ASP-02

|    |             |             |             |
|----|-------------|-------------|-------------|
| N  | -3.07254100 | 0.08442500  | -0.67982400 |
| H  | -3.63720200 | -0.19992700 | 0.12473400  |
| H  | -3.30382200 | -0.54537400 | -1.45092600 |
| H  | -3.32365500 | 1.03874700  | -0.94606000 |
| C  | -1.61983100 | -0.00930200 | -0.34020100 |
| H  | -1.07810900 | 0.14371700  | -1.27135300 |
| C  | -1.24674800 | 1.07805500  | 0.69149200  |
| C  | -1.33172900 | -1.43245700 | 0.15886100  |
| H  | -2.13930000 | 1.62237300  | 0.99226400  |
| H  | -0.83638600 | 0.60642600  | 1.58576000  |
| C  | -0.20662200 | 2.07746800  | 0.18519400  |
| O  | -2.29084400 | -2.17168300 | 0.41653400  |
| O  | -0.48470400 | 3.28680700  | 0.20151700  |
| O  | 0.93025400  | 1.63447700  | -0.22476900 |
| O  | -0.10697600 | -1.76441000 | 0.28827700  |
| Cd | 1.62237500  | -0.44627200 | -0.08125400 |

Molecule: Cd-ASP-03

|    |             |             |             |
|----|-------------|-------------|-------------|
| N  | 3.72365600  | -1.23728800 | -0.35361500 |
| H  | 3.92370700  | -1.63021100 | 0.56845600  |
| H  | 4.46678800  | -0.55941100 | -0.57146900 |
| H  | 3.71580200  | -1.99751000 | -1.03373300 |
| C  | 2.43691000  | -0.47091700 | -0.35165300 |
| H  | 2.06963400  | -0.48652000 | -1.37646600 |
| C  | 1.42835400  | -1.12808300 | 0.57710600  |
| C  | 2.75297300  | 0.99994600  | 0.00139000  |
| H  | 1.40028700  | -2.20298700 | 0.37569500  |
| H  | 1.71290700  | -0.98592900 | 1.61819200  |
| C  | 0.01858000  | -0.62683800 | 0.36167500  |
| O  | 3.95518500  | 1.35221400  | -0.09952600 |
| O  | -0.41434500 | -0.51155200 | -0.82660100 |
| O  | -0.71587200 | -0.39374900 | 1.36010800  |
| O  | 1.77493900  | 1.70978900  | 0.32149900  |
| Cd | -2.49947700 | 0.13802800  | -0.13917300 |

Molecule: Cu-ASP-01

|    |             |             |             |
|----|-------------|-------------|-------------|
| N  | -1.73196800 | 2.44169200  | -0.00112700 |
| H  | -1.60680200 | 2.65768400  | -0.99334000 |
| H  | -1.18380000 | 3.12035300  | 0.53198600  |
| H  | -2.72078200 | 2.55551200  | 0.23205100  |
| C  | -1.28938900 | 1.04390400  | 0.29792400  |
| H  | -1.49136200 | 0.87065700  | 1.35350100  |
| C  | -2.06615500 | 0.04970800  | -0.55394900 |
| C  | 0.21561900  | 0.96933500  | 0.07309000  |
| H  | -3.12399500 | 0.32562800  | -0.52706500 |
| H  | -1.73262500 | 0.09944500  | -1.58990400 |
| C  | -1.97974900 | -1.39606500 | -0.03495900 |
| O  | 0.86631800  | 1.96083600  | -0.24858000 |
| O  | -2.10376200 | -1.57232500 | 1.20470700  |
| O  | -1.84135600 | -2.30009500 | -0.89890900 |
| O  | 0.69912900  | -0.21437700 | 0.25438600  |
| Cu | 2.54270900  | -0.47292200 | -0.00637300 |

Molecule: Cu-ASP-02

|    |             |             |             |
|----|-------------|-------------|-------------|
| N  | 2.57519700  | 1.17858300  | 0.57226500  |
| H  | 3.08129800  | 1.27253200  | -0.31200900 |
| H  | 3.15200400  | 0.61020500  | 1.19624100  |
| H  | 2.45970400  | 2.10736800  | 0.98367000  |
| C  | 1.24504500  | 0.53441600  | 0.35660600  |
| H  | 0.77334800  | 0.47368000  | 1.33565400  |
| C  | 0.40480800  | 1.39768900  | -0.60147900 |
| C  | 1.47850200  | -0.88671400 | -0.15898300 |
| H  | 0.86491300  | 2.37787600  | -0.70866300 |
| H  | 0.37925700  | 0.94229000  | -1.59362000 |
| C  | -1.03050400 | 1.62069700  | -0.15567100 |
| O  | 2.62594600  | -1.25505500 | -0.41356200 |
| O  | -1.71600300 | 0.61165000  | 0.27344400  |
| O  | -1.51994100 | 2.75115600  | -0.21945900 |
| O  | 0.44268500  | -1.63001000 | -0.30969800 |
| Cu | -1.37881000 | -1.23629300 | 0.13118100  |

Molecule: Cu-ASP-03

|    |             |             |             |
|----|-------------|-------------|-------------|
| N  | 3.16173100  | -1.26708800 | -0.20577600 |
| H  | 3.32362200  | -1.53876200 | 0.76690400  |
| H  | 3.92112300  | -0.63064200 | -0.47731200 |
| H  | 3.17274500  | -2.10869700 | -0.78374000 |
| C  | 1.88414300  | -0.50290000 | -0.34161700 |
| H  | 1.60610900  | -0.55162500 | -1.39356000 |
| C  | 0.80566900  | -1.13370600 | 0.52566100  |
| C  | 2.16243400  | 0.97948500  | -0.00448000 |
| H  | 0.73629100  | -2.20318200 | 0.30412100  |
| H  | 1.04192600  | -1.01919300 | 1.58281300  |
| C  | -0.55107700 | -0.56796900 | 0.26207900  |
| O  | 3.35987600  | 1.35017100  | -0.06677300 |
| O  | -1.00160400 | -0.43487900 | -0.92343200 |
| O  | -1.34368300 | -0.27392400 | 1.21124200  |
| O  | 1.15730900  | 1.67193600  | 0.26600600  |
| Cu | -2.72814200 | 0.19882100  | -0.17603400 |

## Molecule: Fe-ASP-01

|    |             |             |             |
|----|-------------|-------------|-------------|
| N  | -0.66886600 | 2.54640500  | 0.11688700  |
| H  | -0.48495300 | 2.76277100  | -0.86717900 |
| H  | 0.10740900  | 2.91597500  | 0.67271800  |
| H  | -1.52522300 | 3.03122500  | 0.39697300  |
| C  | -0.83959300 | 1.07496100  | 0.33005200  |
| H  | -1.07803400 | 0.92475900  | 1.38292800  |
| C  | -1.97253600 | 0.52657400  | -0.52947000 |
| C  | 0.47886400  | 0.41013100  | 0.07933600  |
| H  | -2.79232900 | 1.24899400  | -0.48871900 |
| H  | -1.66413400 | 0.43934400  | -1.57020600 |
| C  | -2.54438600 | -0.81074000 | -0.02659100 |
| O  | 1.49247900  | 1.05642800  | -0.31651400 |
| O  | -2.36894000 | -1.10871500 | 1.18109100  |
| O  | -3.18863500 | -1.47891000 | -0.87341700 |
| O  | 0.66775800  | -0.83103400 | 0.30341600  |
| Fe | 2.63707400  | -0.67137000 | -0.07004900 |

## Molecule: Fe-ASP-02

|    |             |             |             |
|----|-------------|-------------|-------------|
| N  | -2.61532500 | 1.15236100  | -0.41043500 |
| H  | -3.07387400 | 1.13609800  | 0.50513100  |
| H  | -3.20947200 | 0.63259800  | -1.06064900 |
| H  | -2.55018300 | 2.12311400  | -0.72545500 |
| C  | -1.25876100 | 0.53549100  | -0.32940300 |
| H  | -0.84915500 | 0.55381800  | -1.33855700 |
| C  | -0.37385000 | 1.34864000  | 0.63712800  |
| C  | -1.43991800 | -0.92439500 | 0.07743000  |
| H  | -0.83272000 | 2.31675300  | 0.82413400  |
| H  | -0.28853200 | 0.83216900  | 1.59516300  |
| C  | 1.03034900  | 1.60785500  | 0.12122600  |
| O  | -2.55132600 | -1.38095800 | 0.28284900  |
| O  | 1.48390800  | 2.73827100  | 0.06514200  |
| O  | 1.76373700  | 0.57353100  | -0.24871400 |
| O  | -0.35654100 | -1.63922200 | 0.18361100  |
| Fe | 1.48638700  | -1.28460000 | -0.08569700 |

## Molecule: Fe-ASP-03

|    |             |             |             |
|----|-------------|-------------|-------------|
| N  | 3.18045400  | -1.09559300 | -0.19659600 |
| H  | 3.35269200  | -1.36089800 | 0.77635700  |
| H  | 3.86617800  | -0.37098600 | -0.44314100 |
| H  | 3.30592300  | -1.91895500 | -0.78730100 |
| C  | 1.82846300  | -0.48629700 | -0.35875300 |
| H  | 1.58928400  | -0.54231000 | -1.41990200 |
| C  | 0.79278500  | -1.25080800 | 0.45897300  |
| C  | 1.90714700  | 1.01111800  | 0.01734800  |
| H  | 0.76866800  | -2.29910200 | 0.14667500  |
| H  | 1.02184100  | -1.20659400 | 1.52295300  |
| C  | -0.56809400 | -0.70201700 | 0.23028900  |
| O  | 3.04327400  | 1.53729000  | -0.00700500 |
| O  | -1.05286600 | -0.54565400 | -0.94389600 |
| O  | -1.37138200 | -0.39790300 | 1.17515600  |
| O  | 0.80987000  | 1.55389700  | 0.27483000  |
| Fe | -2.74464400 | 0.25980700  | -0.17305000 |

## Molecule: Hg-ASP-01

|    |             |             |             |
|----|-------------|-------------|-------------|
| N  | -2.91002100 | 2.35707000  | 0.01971500  |
| H  | -2.86920300 | 2.58013800  | -0.97813700 |
| H  | -2.36833300 | 3.06822800  | 0.51581500  |
| H  | -3.88543200 | 2.40846600  | 0.32123200  |
| C  | -2.36092600 | 0.98971700  | 0.28493700  |
| H  | -2.50274100 | 0.79901300  | 1.34769900  |
| C  | -3.11109300 | -0.05079500 | -0.53148800 |
| C  | -0.85365400 | 1.02283400  | 0.02390600  |
| H  | -4.18194600 | 0.15753700  | -0.45104000 |
| H  | -2.83411700 | 0.01737400  | -1.58269300 |
| C  | -2.91094300 | -1.48649100 | -0.01663200 |
| O  | -0.27974800 | 2.07938600  | -0.22024100 |
| O  | -2.95568500 | -1.66366700 | 1.22848100  |
| O  | -2.76892000 | -2.38542000 | -0.88522200 |
| O  | -0.31570600 | -0.14405000 | 0.12380900  |
| Hg | 1.81240100  | -0.14339800 | 0.00187700  |

## Molecule: Hg-ASP-02

|    |             |             |             |
|----|-------------|-------------|-------------|
| N  | 3.28485100  | -0.07449800 | 0.76685500  |
| H  | 3.90372900  | -0.37110300 | 0.00813100  |
| H  | 3.43518300  | -0.71149000 | 1.55247000  |
| H  | 3.54273400  | 0.87127300  | 1.05831400  |
| C  | 1.86054800  | -0.11664700 | 0.32110800  |
| H  | 1.26314900  | 0.05222900  | 1.21573100  |
| C  | 1.59437200  | 0.97922700  | -0.73096300 |
| C  | 1.53853600  | -1.52482200 | -0.19690700 |
| H  | 2.53906100  | 1.39518200  | -1.07378800 |
| H  | 1.09971200  | 0.53587600  | -1.59565700 |
| C  | 0.71015500  | 2.11949500  | -0.23122600 |
| O  | 2.46240800  | -2.32534200 | -0.36993100 |
| O  | -0.51203500 | 1.86137700  | 0.12077900  |
| O  | 1.16143600  | 3.26920200  | -0.19531500 |
| O  | 0.30625500  | -1.78836900 | -0.43429800 |
| Hg | -1.25429600 | -0.22661200 | 0.06906100  |

## Molecule: Hg-ASP-031

|    |             |             |             |
|----|-------------|-------------|-------------|
| N  | 4.45091800  | -1.20055000 | 0.03125300  |
| H  | 4.52760700  | -1.43556000 | 1.02321700  |
| H  | 5.20974900  | -0.54245800 | -0.18905300 |
| H  | 4.54653900  | -2.05910700 | -0.51215300 |
| C  | 3.16725200  | -0.48958600 | -0.26446500 |
| H  | 2.97126600  | -0.64171600 | -1.32479000 |
| C  | 2.03065500  | -1.06810100 | 0.56394900  |
| C  | 3.38936900  | 1.02396400  | -0.04944200 |
| H  | 2.06248000  | -2.16000000 | 0.51372400  |
| H  | 2.12112800  | -0.77168900 | 1.60683100  |
| C  | 0.67439400  | -0.67306400 | 0.00788700  |
| O  | 4.58289500  | 1.41482100  | -0.00979100 |
| O  | 0.43181100  | -0.75710200 | -1.19571300 |
| O  | -0.18612900 | -0.30799900 | 0.90948300  |
| O  | 2.35501600  | 1.72154300  | 0.03048200  |
| Hg | -2.07042400 | 0.08356200  | -0.00949800 |

## Molecule: Mn-ASP-11

|    |             |             |             |
|----|-------------|-------------|-------------|
| N  | -0.88417300 | 2.55897100  | -0.05689700 |
| H  | -0.83612200 | 2.71561000  | -1.06654200 |
| H  | -0.04017700 | 2.96264200  | 0.35740100  |
| H  | -1.70837800 | 3.04189600  | 0.30499600  |
| C  | -0.95175700 | 1.09404700  | 0.25227200  |
| H  | -1.17397600 | 1.01705700  | 1.31624900  |
| C  | -2.05633400 | 0.43142100  | -0.54999000 |
| C  | 0.43322500  | 0.49281100  | 0.04616300  |
| H  | -2.94069800 | 1.07521100  | -0.51790900 |
| H  | -1.76098100 | 0.32490500  | -1.59298200 |
| C  | -2.49628600 | -0.92716200 | 0.01683800  |
| O  | 1.42216200  | 1.27151600  | -0.01074400 |
| O  | -2.54001600 | -1.05151800 | 1.26891200  |
| O  | -2.83517800 | -1.80470400 | -0.81940800 |
| O  | 0.53523200  | -0.76114200 | -0.00417700 |
| Mn | 2.89675500  | -0.67320100 | -0.01885200 |

## Molecule: Mn-ASP-21

|    |             |             |             |
|----|-------------|-------------|-------------|
| N  | 2.64870500  | 0.30369400  | 1.04422000  |
| H  | 3.26496200  | 0.38444900  | 0.22961400  |
| H  | 2.94236000  | -0.52351400 | 1.56729600  |
| H  | 2.76157100  | 1.12553800  | 1.64125200  |
| C  | 1.23549300  | 0.16134900  | 0.57274400  |
| H  | 0.64465600  | -0.16331900 | 1.42569200  |
| C  | 0.75291100  | 1.51449400  | 0.05684400  |
| C  | 1.21537400  | -0.91442100 | -0.52650400 |
| H  | 1.00917300  | 2.27636700  | 0.79940500  |
| H  | 1.28202700  | 1.77470700  | -0.86024300 |
| C  | -0.74880200 | 1.68143600  | -0.18440200 |
| O  | 2.27141900  | -1.13856700 | -1.13756800 |
| O  | -1.57021600 | 0.92442900  | 0.44174600  |
| O  | -1.09550000 | 2.61069000  | -0.93139600 |
| O  | 0.10016100  | -1.48171300 | -0.75323900 |
| Mn | -1.71289800 | -1.15903800 | 0.29676000  |

## Molecule: Mn-ASP-31

|    |             |             |             |
|----|-------------|-------------|-------------|
| N  | 3.13510900  | -1.29435200 | -0.21069500 |
| H  | 3.30904100  | -1.54029600 | 0.76663300  |
| H  | 3.91739400  | -0.70946200 | -0.52369900 |
| H  | 3.08589600  | -2.15573500 | -0.75624300 |
| C  | 1.88414700  | -0.47884000 | -0.33492900 |
| H  | 1.61843100  | -0.48895700 | -1.39119500 |
| C  | 0.77510700  | -1.10135400 | 0.49163800  |
| C  | 2.22866700  | 0.98104800  | 0.03766100  |
| H  | 0.73352500  | -2.17602900 | 0.28733400  |
| H  | 0.97245800  | -0.97604900 | 1.55554900  |
| C  | -0.60309400 | -0.56501400 | 0.16328400  |
| O  | 3.43792900  | 1.30834500  | -0.06916500 |
| O  | -0.90112700 | -0.27222500 | -1.02316400 |
| O  | -1.44475400 | -0.49208900 | 1.11385200  |
| O  | 1.27189600  | 1.71138200  | 0.37611900  |
| Mn | -3.20812100 | 0.24194600  | -0.15162300 |

## Molecule: Ni-ASP-01

|    |             |             |             |
|----|-------------|-------------|-------------|
| N  | -0.69855700 | 2.57684300  | -0.02415500 |
| H  | -0.44670700 | 2.71480600  | -1.00706100 |
| H  | 0.03781100  | 2.99203300  | 0.55208700  |
| H  | -1.57270000 | 3.07714900  | 0.15380400  |
| C  | -0.87635600 | 1.12444300  | 0.28547700  |
| H  | -1.15851200 | 1.05314000  | 1.33572600  |
| C  | -1.96850700 | 0.50834900  | -0.57835800 |
| C  | 0.44913300  | 0.43309100  | 0.12802500  |
| H  | -2.80916400 | 1.20694700  | -0.60814200 |
| H  | -1.61707500 | 0.36677100  | -1.59916300 |
| C  | -2.52290700 | -0.81350500 | -0.01580700 |
| O  | 1.51607300  | 1.08189300  | -0.10882600 |
| O  | -2.54737300 | -0.95213900 | 1.23333900  |
| O  | -2.95733000 | -1.63473300 | -0.86234100 |
| O  | 0.53901100  | -0.82873400 | 0.24234300  |
| Ni | 2.48446500  | -0.65333300 | -0.05751100 |

## Molecule: Ni-ASP-02

|    |             |             |             |
|----|-------------|-------------|-------------|
| N  | -2.42586700 | 1.42478400  | -0.47571000 |
| H  | -2.91577600 | 1.48485300  | 0.42088400  |
| H  | -3.05850000 | 0.97335700  | -1.13949800 |
| H  | -2.22252500 | 2.37183100  | -0.80285400 |
| C  | -1.16355000 | 0.63735500  | -0.33141200 |
| H  | -0.72665900 | 0.57866100  | -1.32759400 |
| C  | -0.21217900 | 1.36549500  | 0.64094700  |
| C  | -1.55119600 | -0.77816300 | 0.10499700  |
| H  | -0.58528400 | 2.36971100  | 0.82848500  |
| H  | -0.18240700 | 0.84365000  | 1.59965600  |
| C  | 1.21662800  | 1.50058400  | 0.13563900  |
| O  | -2.72763700 | -1.04206700 | 0.33540400  |
| O  | 1.76380000  | 2.60133800  | 0.12143800  |
| O  | 1.83451100  | 0.42687600  | -0.26070700 |
| O  | -0.59758500 | -1.63882800 | 0.20385500  |
| Ni | 1.24104600  | -1.34734800 | -0.09821600 |

## Molecule: Ni-ASP-03

|    |             |             |             |
|----|-------------|-------------|-------------|
| N  | 3.14613400  | -1.24548600 | -0.19311500 |
| H  | 3.30381700  | -1.51195600 | 0.78180200  |
| H  | 3.89730300  | -0.59691000 | -0.45898000 |
| H  | 3.17752600  | -2.08788600 | -0.76928900 |
| C  | 1.85807100  | -0.50337400 | -0.34396000 |
| H  | 1.59577200  | -0.55205300 | -1.39996500 |
| C  | 0.77654900  | -1.15380200 | 0.50483400  |
| C  | 2.10559400  | 0.98235900  | 0.00384100  |
| H  | 0.70891300  | -2.21912700 | 0.26382200  |
| H  | 1.00388200  | -1.05709600 | 1.56541400  |
| C  | -0.57589300 | -0.58146800 | 0.23880700  |
| O  | 3.29536300  | 1.37706300  | -0.05275000 |
| O  | -1.01478500 | -0.41838400 | -0.94820100 |
| O  | -1.37873200 | -0.30453100 | 1.18968100  |
| O  | 1.08586600  | 1.65241700  | 0.27620500  |
| Ni | -2.73563500 | 0.20816500  | -0.17041400 |

## Molecule: Zn-ASP-01

|    |             |             |             |
|----|-------------|-------------|-------------|
| N  | -0.88555400 | 2.57300900  | -0.02885300 |
| H  | -0.55846200 | 2.67838300  | -0.99249900 |
| H  | -0.20409800 | 3.02862700  | 0.58170200  |
| H  | -1.78335700 | 3.05334100  | 0.06319700  |
| C  | -1.03639800 | 1.12411500  | 0.32187800  |
| H  | -1.36928800 | 1.08217500  | 1.35615800  |
| C  | -2.06964000 | 0.47334700  | -0.59153300 |
| C  | 0.31830200  | 0.44980200  | 0.21229600  |
| H  | -2.94956900 | 1.12181500  | -0.62903100 |
| H  | -1.67384200 | 0.38532400  | -1.60277200 |
| C  | -2.54991000 | -0.89778600 | -0.08645900 |
| O  | 1.29123100  | 1.09620500  | -0.28066800 |
| O  | -2.81141400 | -1.00306100 | 1.13942600  |
| O  | -2.68910600 | -1.79976800 | -0.95225500 |
| O  | 0.44346600  | -0.74023600 | 0.58951300  |
| Zn | 2.56299800  | -0.55609100 | -0.05600000 |

## Molecule: Zn-ASP-02

|    |             |             |             |
|----|-------------|-------------|-------------|
| N  | -2.50686200 | 1.28826800  | -0.54690300 |
| H  | -3.04040600 | 1.34143900  | 0.32426500  |
| H  | -3.08645200 | 0.79710300  | -1.23051700 |
| H  | -2.33067700 | 2.23726100  | -0.88354600 |
| C  | -1.22049100 | 0.56051500  | -0.33132700 |
| H  | -0.73954000 | 0.50184100  | -1.30623500 |
| C  | -0.33691000 | 1.34331200  | 0.66387800  |
| C  | -1.54596600 | -0.86933500 | 0.12779000  |
| H  | -0.81122700 | 2.29325400  | 0.90130700  |
| H  | -0.24443200 | 0.78276900  | 1.59564700  |
| C  | 1.07302800  | 1.63432700  | 0.15270100  |
| O  | -2.72341800 | -1.15960800 | 0.36134300  |
| O  | 1.80867000  | 0.65120000  | -0.24467400 |
| O  | 1.47792400  | 2.80394500  | 0.15227100  |
| O  | -0.56793900 | -1.68760100 | 0.24394600  |
| Zn | 1.33403000  | -1.26159800 | -0.11179800 |

## Molecule: Zn-ASP-03

|    |             |             |             |
|----|-------------|-------------|-------------|
| N  | 3.23357700  | -1.16955100 | -0.32514700 |
| H  | 3.42793200  | -1.54978500 | 0.60348300  |
| H  | 3.94385100  | -0.45109400 | -0.52197200 |
| H  | 3.28769700  | -1.92926800 | -1.00377200 |
| C  | 1.90970000  | -0.47247800 | -0.35972200 |
| H  | 1.58181000  | -0.48601400 | -1.39784300 |
| C  | 0.90415500  | -1.20531200 | 0.51762400  |
| C  | 2.14013500  | 1.00752800  | 0.02801200  |
| H  | 0.89616900  | -2.26460200 | 0.24627800  |
| H  | 1.18016500  | -1.12381900 | 1.56773700  |
| C  | -0.50090100 | -0.69443900 | 0.32396100  |
| O  | 3.32629700  | 1.41941400  | -0.03054400 |
| O  | -0.94801900 | -0.55270800 | -0.86312600 |
| O  | -1.23528400 | -0.43905600 | 1.31497800  |
| O  | 1.12031400  | 1.66538800  | 0.32616800  |
| Zn | -2.72592200 | 0.24784400  | -0.20856500 |

Molecule: Cd-GLU-01

|    |             |             |             |
|----|-------------|-------------|-------------|
| N  | -0.75231400 | 2.98471200  | -0.02076600 |
| H  | -0.50858700 | 2.92445800  | -1.01301800 |
| H  | -0.00822700 | 3.50188400  | 0.45269500  |
| H  | -1.62516500 | 3.50905000  | 0.07199400  |
| C  | -0.91203100 | 1.60914100  | 0.55255100  |
| H  | -1.08196300 | 1.72673600  | 1.61986700  |
| C  | -2.10928400 | 0.93613000  | -0.12292700 |
| C  | 0.37929700  | 0.83962600  | 0.32297700  |
| H  | -2.95766100 | 1.61637200  | -0.02546500 |
| H  | -1.89591200 | 0.83291300  | -1.18870400 |
| C  | -2.46589500 | -0.41194900 | 0.48344100  |
| O  | 1.10219300  | 1.15198600  | -0.66005500 |
| H  | -1.63805600 | -1.11575200 | 0.37854100  |
| H  | -2.64254500 | -0.30936600 | 1.55696500  |
| C  | -3.70075600 | -1.08128500 | -0.12886200 |
| O  | -4.06242500 | -2.16779900 | 0.40551500  |
| O  | -4.27016100 | -0.53456100 | -1.11084900 |
| O  | 0.65467100  | -0.11067700 | 1.10412500  |
| Cd | 2.56421100  | -0.65918500 | -0.13042700 |

Molecule: Cd-GLU-02

|    |             |             |             |
|----|-------------|-------------|-------------|
| N  | -4.04942900 | 1.66677800  | -0.31108600 |
| H  | -4.19527900 | 1.73893100  | 0.70235600  |
| H  | -4.96976400 | 1.62738600  | -0.75160000 |
| H  | -3.55811300 | 2.49289100  | -0.65642400 |
| C  | -3.27604900 | 0.40765300  | -0.56782300 |
| H  | -3.43170600 | 0.13905200  | -1.60949800 |
| C  | -1.80040000 | 0.68462800  | -0.28635800 |
| C  | -3.84899400 | -0.68703200 | 0.35701000  |
| H  | -1.50556900 | 1.57077700  | -0.85250800 |
| H  | -1.68104700 | 0.92071500  | 0.77277700  |
| C  | -0.89945600 | -0.47961000 | -0.66988700 |
| O  | -4.34535500 | -0.29065100 | 1.44235600  |
| H  | -1.17427300 | -1.38560900 | -0.12621100 |
| H  | -1.00128300 | -0.71996100 | -1.73024600 |
| C  | 0.56629300  | -0.24459600 | -0.39327900 |
| O  | 1.39730300  | -1.12778800 | -0.76733500 |
| O  | 0.94702400  | 0.79824600  | 0.21527100  |
| O  | -3.73742600 | -1.86894400 | -0.03880800 |
| Cd | 3.15254800  | 0.07865000  | 0.18706500  |

Molecule: Cd-GLU-03

|    |             |             |             |
|----|-------------|-------------|-------------|
| N  | 2.88733800  | 0.83575400  | -1.26547300 |
| H  | 2.47032500  | 0.11200600  | -1.85760900 |
| H  | 3.83058900  | 0.53603300  | -1.00820000 |
| H  | 2.96468700  | 1.69656600  | -1.81304000 |
| C  | 2.03298700  | 1.05632400  | -0.05032100 |
| H  | 2.57730400  | 1.73832800  | 0.59665100  |
| C  | 0.70379400  | 1.65294700  | -0.50766300 |
| C  | 1.86674800  | -0.29848200 | 0.66996800  |
| H  | 0.90056000  | 2.60631900  | -0.99958100 |
| H  | 0.28259600  | 0.98394900  | -1.26128300 |
| C  | -0.30206500 | 1.84968800  | 0.64067500  |
| O  | 1.37386400  | -1.25222500 | -0.03837800 |
| H  | -0.10714600 | 1.13333600  | 1.44218400  |
| H  | -0.21089500 | 2.84878800  | 1.05951500  |
| C  | -1.74034600 | 1.62321900  | 0.18792200  |
| O  | -2.52714200 | 2.58089000  | 0.12547900  |
| O  | -2.11076900 | 0.42116700  | -0.11527600 |
| O  | 2.20168200  | -0.37851800 | 1.85296800  |
| Cd | -0.82889900 | -1.32871500 | -0.15712800 |

Molecule: Cu-GLU-01

|    |             |             |             |
|----|-------------|-------------|-------------|
| N  | 0.15095600  | 2.85017100  | 0.01241200  |
| H  | 0.30188800  | 2.82034600  | -1.00001000 |
| H  | 0.99097000  | 3.23738300  | 0.45049300  |
| H  | -0.63021100 | 3.48368100  | 0.20225700  |
| C  | -0.16995800 | 1.48590600  | 0.54239300  |
| H  | -0.26040400 | 1.57414200  | 1.62222200  |
| C  | -1.48257400 | 1.00527500  | -0.08097300 |
| C  | 0.97617100  | 0.55718000  | 0.22988800  |
| H  | -2.24819500 | 1.73286000  | 0.19085400  |
| H  | -1.37930300 | 1.02370500  | -1.16778100 |
| C  | -1.89532100 | -0.38101400 | 0.38997900  |
| O  | 1.61016600  | 0.62120300  | -0.86063300 |
| H  | -1.17912300 | -1.13542200 | 0.05847500  |
| H  | -1.89942800 | -0.42480000 | 1.48239500  |
| C  | -3.27992200 | -0.83347400 | -0.09047300 |
| O  | -3.61089200 | -2.01184300 | 0.22079200  |
| O  | -3.99365700 | -0.02944200 | -0.74654200 |
| O  | 1.30019600  | -0.34376500 | 1.06421900  |
| Cu | 2.68656000  | -1.00536400 | -0.18253000 |

Molecule: Cu-GLU-02

|    |             |             |             |
|----|-------------|-------------|-------------|
| N  | -3.43178600 | 1.66785300  | -0.23174900 |
| H  | -3.62037900 | 1.66270400  | 0.77680300  |
| H  | -4.33249600 | 1.63488000  | -0.71235300 |
| H  | -2.95306700 | 2.53065400  | -0.49545700 |
| C  | -2.61309700 | 0.45424300  | -0.55067800 |
| H  | -2.70319300 | 0.27630000  | -1.61918700 |
| C  | -1.16115900 | 0.73550600  | -0.16839400 |
| C  | -3.20666600 | -0.73401500 | 0.23628700  |
| H  | -0.84441900 | 1.64830900  | -0.67667100 |
| H  | -1.10313000 | 0.91991200  | 0.90639500  |
| C  | -0.23792800 | -0.41023500 | -0.55683600 |
| O  | -3.76536300 | -0.45513800 | 1.32682900  |
| H  | -0.51693700 | -1.33994500 | -0.05866700 |
| H  | -0.29673200 | -0.61372700 | -1.63001200 |
| C  | 1.20075200  | -0.17265100 | -0.24638100 |
| O  | 2.05705000  | -1.10385700 | -0.43843600 |
| O  | 1.65086700  | 0.92522400  | 0.20924400  |
| O  | -3.05149100 | -1.86813500 | -0.27030600 |
| Cu | 3.49561800  | 0.08221000  | 0.21478500  |

Molecule: Cu-GLU-03

|    |             |             |             |
|----|-------------|-------------|-------------|
| N  | 2.81876800  | 1.54507600  | -0.56619200 |
| H  | 2.68787300  | 1.39580400  | -1.56994300 |
| H  | 3.67596300  | 1.05827000  | -0.28598900 |
| H  | 2.91500200  | 2.54773600  | -0.39844700 |
| C  | 1.67067600  | 0.97694400  | 0.21118100  |
| H  | 1.79090900  | 1.35341500  | 1.22831600  |
| C  | 0.34332700  | 1.44072200  | -0.36724900 |
| C  | 1.90297500  | -0.54390000 | 0.28891100  |
| H  | 0.46163500  | 2.44716200  | -0.76790100 |
| H  | 0.07493800  | 0.78946100  | -1.20023100 |
| C  | -0.76709800 | 1.45372700  | 0.70231200  |
| O  | 0.89970200  | -1.31863100 | 0.44538700  |
| H  | -0.52200800 | 0.75118600  | 1.50033400  |
| H  | -0.85959400 | 2.44517900  | 1.13949900  |
| C  | -2.10473400 | 1.03298000  | 0.13813000  |
| O  | -3.04504900 | 1.82433600  | 0.03096500  |
| O  | -2.22231400 | -0.20932600 | -0.22861300 |
| O  | 3.07330800  | -0.93910200 | 0.26124200  |
| Cu | -0.89214300 | -1.53878600 | -0.19289200 |

Molecule:Fe-GLU-01

|    |             |             |             |
|----|-------------|-------------|-------------|
| N  | 0.26994100  | 2.76556000  | 0.06718500  |
| H  | 0.43836500  | 2.77627800  | -0.94336400 |
| H  | 1.10862400  | 3.12136200  | 0.53397900  |
| H  | -0.50483400 | 3.40391800  | 0.26766600  |
| C  | -0.08856700 | 1.39234300  | 0.53936400  |
| H  | -0.24018900 | 1.44983800  | 1.61702200  |
| C  | -1.37379400 | 0.92438100  | -0.16022800 |
| C  | 1.06693600  | 0.47591000  | 0.27958500  |
| H  | -2.08568500 | 1.74646000  | -0.07522200 |
| H  | -1.16620700 | 0.77933400  | -1.22166300 |
| C  | -1.97005900 | -0.33090500 | 0.45767800  |
| O  | 2.05737700  | 0.80426200  | -0.44650300 |
| H  | -1.30482400 | -1.18565900 | 0.33192700  |
| H  | -2.09495200 | -0.19498900 | 1.53509400  |
| C  | -3.33477400 | -0.73143600 | -0.11618200 |
| O  | -3.84077900 | -1.78800800 | 0.35410300  |
| O  | -3.86152100 | -0.00378400 | -0.99852100 |
| O  | 1.10087200  | -0.70254800 | 0.75585800  |
| Fe | 2.86592600  | -1.08140700 | -0.22448200 |

Molecule:Hg-GLU-01

|    |             |             |             |
|----|-------------|-------------|-------------|
| N  | -1.31719700 | 2.91676700  | -0.25975500 |
| H  | -0.98494900 | 2.70285300  | -1.20371500 |
| H  | -0.59865100 | 3.47121300  | 0.21121800  |
| H  | -2.16528900 | 3.48355700  | -0.33682600 |
| C  | -1.61258600 | 1.65264100  | 0.48968100  |
| H  | -1.93009000 | 1.94525200  | 1.48681600  |
| C  | -2.72090200 | 0.89422700  | -0.23849100 |
| C  | -0.33312200 | 0.82520200  | 0.62159900  |
| H  | -3.57972500 | 1.56442400  | -0.30751300 |
| H  | -2.39005500 | 0.68107100  | -1.25692800 |
| C  | -3.12830900 | -0.39042600 | 0.46618200  |
| O  | 0.43829600  | 0.87688700  | -0.41210000 |
| H  | -2.30049300 | -1.10258500 | 0.48399400  |
| H  | -3.37655200 | -0.18838100 | 1.51130600  |
| C  | -4.32664700 | -1.11010400 | -0.16263100 |
| O  | -4.68536300 | -2.18178400 | 0.40230300  |
| O  | -4.87322300 | -0.61196800 | -1.18235700 |
| O  | -0.13730800 | 0.16726500  | 1.63814400  |
| Hg | 2.16670500  | -0.37759000 | -0.11745000 |

Molecule:Fe-GLU-02

|    |             |             |             |
|----|-------------|-------------|-------------|
| N  | -3.28664900 | 1.67356200  | -0.34655600 |
| H  | -3.48635700 | 1.72974300  | 0.65854200  |
| H  | -4.18382600 | 1.64189200  | -0.83377000 |
| H  | -2.77869800 | 2.50509100  | -0.65304800 |
| C  | -2.50573200 | 0.41777300  | -0.58633500 |
| H  | -2.59882800 | 0.17481600  | -1.64171500 |
| C  | -1.04869200 | 0.68425700  | -0.21517300 |
| C  | -3.13176400 | -0.69971600 | 0.27503100  |
| H  | -0.71282300 | 1.57080300  | -0.75693700 |
| H  | -0.98701000 | 0.90669700  | 0.85171800  |
| C  | -0.13923200 | -0.48765400 | -0.56109400 |
| O  | -3.74724300 | -0.32956400 | 1.30578800  |
| H  | -0.42054400 | -1.39544100 | -0.01947400 |
| H  | -0.18825100 | -0.74275200 | -1.62249600 |
| C  | 1.28229600  | -0.23867600 | -0.23573600 |
| O  | 2.21827900  | -1.03527100 | -0.60959100 |
| O  | 1.68745400  | 0.76330200  | 0.44516000  |
| O  | -2.93937300 | -1.87292000 | -0.11596500 |
| Fe | 3.61033500  | 0.13976700  | 0.23768400  |

Molecule:Hg-GLU-02

|    |             |             |             |
|----|-------------|-------------|-------------|
| N  | -4.70358200 | 1.69690500  | -0.23192600 |
| H  | -4.85571000 | 1.71717000  | 0.78280600  |
| H  | -5.62082500 | 1.69024600  | -0.68070900 |
| H  | -4.20192300 | 2.53541900  | -0.52903800 |
| C  | -3.94141100 | 0.44536700  | -0.55025100 |
| H  | -4.08671300 | 0.23731600  | -1.60708600 |
| C  | -2.46716500 | 0.69381400  | -0.23872300 |
| C  | -4.53597200 | -0.69335900 | 0.30512600  |
| H  | -2.14793400 | 1.58087200  | -0.78896100 |
| H  | -2.36329100 | 0.91417100  | 0.82571700  |
| C  | -1.57732800 | -0.48071500 | -0.61763400 |
| O  | -5.01813500 | -0.35660500 | 1.41622300  |
| H  | -1.85540700 | -1.38639500 | -0.07815200 |
| H  | -1.67160800 | -0.71634500 | -1.68040500 |
| C  | -0.10883800 | -0.24038200 | -0.34779000 |
| O  | 0.69828300  | -1.19776100 | -0.57188400 |
| O  | 0.29225400  | 0.87060100  | 0.08736600  |
| O  | -4.45634600 | -1.84833000 | -0.17052800 |
| Hg | 2.54230400  | 0.04322000  | 0.09981900  |

Molecule:Fe-GLU-03

|    |             |             |             |
|----|-------------|-------------|-------------|
| N  | 2.60011000  | 0.99896900  | -1.20479700 |
| H  | 2.28072700  | 0.29052700  | -1.87191900 |
| H  | 3.55225900  | 0.76291800  | -0.91258200 |
| H  | 2.63133000  | 1.90055200  | -1.68933700 |
| C  | 1.66665300  | 1.08277700  | -0.03163500 |
| H  | 2.08785700  | 1.81730800  | 0.64914700  |
| C  | 0.29214200  | 1.49812800  | -0.53236900 |
| C  | 1.67359100  | -0.27652700 | 0.68599300  |
| H  | 0.37834800  | 2.47330900  | -1.01041800 |
| H  | -0.01432300 | 0.78542700  | -1.30114600 |
| C  | -0.76018800 | 1.55085100  | 0.59180100  |
| O  | 1.12872000  | -1.27332100 | 0.02857300  |
| H  | -0.40937200 | 1.01787400  | 1.47978200  |
| H  | -0.96012900 | 2.57626200  | 0.88991400  |
| C  | -2.06823800 | 0.90497900  | 0.20500800  |
| O  | -3.13098600 | 1.50490400  | 0.21334000  |
| O  | -2.03532800 | -0.37597800 | -0.13047200 |
| O  | 2.18655100  | -0.39764500 | 1.78057900  |
| Fe | -0.68318800 | -1.64776500 | -0.32495400 |

Molecule:Hg-GLU-05

|    |             |             |             |
|----|-------------|-------------|-------------|
| N  | -3.22957400 | 0.11704500  | 1.28966100  |
| H  | -2.59727300 | -0.43712800 | 1.87433900  |
| H  | -4.03615200 | -0.46342300 | 1.04897000  |
| H  | -3.56129300 | 0.91476300  | 1.83736900  |
| C  | -2.50529100 | 0.58583200  | 0.06109300  |
| H  | -3.24078300 | 1.07661600  | -0.56997200 |
| C  | -1.40352100 | 1.54913400  | 0.50382900  |
| C  | -1.95947100 | -0.65408600 | -0.67393000 |
| H  | -1.86785000 | 2.40388200  | 0.99688100  |
| H  | -0.79786200 | 1.03313100  | 1.24988600  |
| C  | -0.50734200 | 2.03169700  | -0.65027800 |
| O  | -1.20775100 | -1.43916100 | 0.02740100  |
| H  | -0.46959100 | 1.28243700  | -1.44384900 |
| H  | -0.89715900 | 2.95133000  | -1.07912800 |
| C  | 0.92581900  | 2.27221600  | -0.19673000 |
| O  | 1.37193300  | 3.42278000  | -0.12049400 |
| O  | 1.68483700  | 1.25570200  | 0.10543600  |
| O  | -2.25793000 | -0.81862100 | -1.85552900 |
| Hg | 0.95056400  | -0.79569100 | 0.09424300  |

## Molecule:Mn-GLU-01

|    |             |             |             |
|----|-------------|-------------|-------------|
| N  | 0.08575500  | 2.81756200  | 0.09225800  |
| H  | 0.29942600  | 2.81562200  | -0.90852300 |
| H  | 0.89131800  | 3.21383400  | 0.58072500  |
| H  | -0.72494800 | 3.41752600  | 0.25935200  |
| C  | -0.19354900 | 1.41845400  | 0.55381800  |
| H  | -0.29780500 | 1.45847600  | 1.63519000  |
| C  | -1.49010200 | 0.94063500  | -0.09739200 |
| C  | 1.00817600  | 0.55107300  | 0.19879600  |
| H  | -2.26630200 | 1.66529200  | 0.15463900  |
| H  | -1.36764000 | 0.95920700  | -1.18266900 |
| C  | -1.91697200 | -0.44348400 | 0.36670400  |
| O  | 1.69959600  | 0.85319200  | -0.80508700 |
| H  | -1.20359500 | -1.20035000 | 0.03548200  |
| H  | -1.92055500 | -0.49041900 | 1.45896900  |
| C  | -3.30427800 | -0.88603100 | -0.11240500 |
| O  | -3.67113300 | -2.03895800 | 0.25223700  |
| O  | -3.98913300 | -0.10204200 | -0.82244900 |
| O  | 1.24339600  | -0.44328600 | 0.94038500  |
| Mn | 3.16433400  | -1.08789000 | -0.18627100 |

## Molecule:Mn-GLU-02

|    |             |             |             |
|----|-------------|-------------|-------------|
| N  | -3.25044900 | 1.74737400  | -0.17561300 |
| H  | -3.45071700 | 1.70773100  | 0.83014100  |
| H  | -4.14555400 | 1.79427900  | -0.66516200 |
| H  | -2.71393800 | 2.58869500  | -0.39358500 |
| C  | -2.50478200 | 0.49832100  | -0.53822400 |
| H  | -2.59601400 | 0.36621700  | -1.61327800 |
| C  | -1.04399300 | 0.68212800  | -0.13148300 |
| C  | -3.17781100 | -0.67558400 | 0.20120500  |
| H  | -0.66723600 | 1.57973500  | -0.62496500 |
| H  | -0.99790400 | 0.85827800  | 0.94609300  |
| C  | -0.16908500 | -0.50671400 | -0.50271600 |
| O  | -3.71600300 | -0.40121300 | 1.30420600  |
| H  | -0.48809800 | -1.41407400 | 0.00861800  |
| H  | -0.24735100 | -0.71577000 | -1.57440800 |
| C  | 1.29934800  | -0.31000100 | -0.21178200 |
| O  | 2.06027900  | -1.31901600 | -0.19049600 |
| O  | 1.76656300  | 0.85605800  | -0.01106900 |
| O  | -3.10305300 | -1.79843600 | -0.34683600 |
| Mn | 3.82302400  | 0.16700900  | 0.21469600  |

## Molecule:Mn-GLU-031

|    |             |             |             |
|----|-------------|-------------|-------------|
| N  | -2.54920800 | -1.18510400 | -1.19995000 |
| H  | -2.28748600 | -0.46158600 | -1.87549900 |
| H  | -3.52603500 | -1.04026400 | -0.93466400 |
| H  | -2.47469200 | -2.09549700 | -1.66029400 |
| C  | -1.64130800 | -1.12229900 | -0.00358600 |
| H  | -2.01279900 | -1.85416800 | 0.70813200  |
| C  | -0.22388000 | -1.43648600 | -0.45930100 |
| C  | -1.77347500 | 0.29010800  | 0.60591900  |
| H  | -0.20775800 | -2.43007100 | -0.90943900 |
| H  | 0.03936400  | -0.71756200 | -1.23799200 |
| C  | 0.79806800  | -1.36053800 | 0.68847900  |
| O  | -1.35349100 | -1.25025300 | -0.12717500 |
| H  | 0.45907000  | -0.65119400 | 1.44804400  |
| H  | 0.91056700  | -2.33058600 | 1.16714400  |
| C  | 2.15324100  | -0.86393300 | 0.20057900  |
| O  | 3.13183600  | -1.62981100 | 0.19914100  |
| O  | 2.22090600  | 0.35956200  | -0.19605300 |
| O  | -2.27059700 | 0.40057100  | 1.73148000  |
| Mn | 0.68956500  | 1.75163800  | -0.29429900 |

## Molecule:Ni-GLU-01

|    |             |             |             |
|----|-------------|-------------|-------------|
| N  | 0.22521400  | 2.75199000  | 0.10877200  |
| H  | 0.40015300  | 2.77815100  | -0.89982200 |
| H  | 1.06356400  | 3.09563300  | 0.58384200  |
| H  | -0.54844900 | 3.38824900  | 0.31716000  |
| C  | -0.13043200 | 1.36776300  | 0.55330200  |
| H  | -0.27417600 | 1.40628000  | 1.63188800  |
| C  | -1.42266900 | 0.92643000  | -0.14499600 |
| C  | 1.03105500  | 0.45673000  | 0.26181900  |
| H  | -2.13609400 | 1.74327700  | -0.02539200 |
| H  | -1.22857400 | 0.81712900  | -1.21353800 |
| C  | -2.01265500 | -0.34981900 | 0.43524300  |
| O  | 1.96328900  | 0.80228700  | -0.52840800 |
| H  | -1.35328500 | -1.20079200 | 0.26005300  |
| H  | -2.11131200 | -0.25824500 | 1.52000700  |
| C  | -3.39167100 | -0.72243500 | -0.12063000 |
| O  | -3.90876700 | -1.77524900 | 0.34779200  |
| O  | -3.92062100 | 0.01973500  | -0.98995300 |
| O  | 1.09569200  | -0.69443300 | 0.78951000  |
| Ni | 2.79761300  | -0.99729800 | -0.20698400 |

## Molecule:Ni-GLU-02

|    |             |               |             |
|----|-------------|---------------|-------------|
| N  | -3.33995700 | 1.67177700    | -0.36480500 |
| H  | -3.54331400 | 1.73660900    | 0.63899200  |
| H  | -4.23472000 | 1.63703600    | -0.85617400 |
| H  | -2.82921600 | 2.49993500    | -0.67549700 |
| C  | -2.55773200 | 0.41322000    | -0.58915100 |
| H  | -2.64364400 | 0.16230500    | -1.64326300 |
| C  | -1.10297000 | 0.68027100    | -0.20938200 |
| C  | -3.19356000 | -0.69519400   | 0.27624400  |
| H  | -0.76248800 | 1.56001300    | -0.75974900 |
| H  | -1.05028500 | 0.91816900    | 0.85469400  |
| C  | -0.19261600 | -0.49651600   | -0.53264600 |
| O  | -3.79083700 | -0.31536700   | 1.31477000  |
| H  | -0.47110800 | -1.38753000   | 0.03549600  |
| H  | -0.25969600 | -0.77547700   | -1.58621700 |
| C  | 1.24396400  | -0.23778200   | -0.23242600 |
| O  | 2.15443800  | -1.03794000   | -0.63980600 |
| O  | 1.63707900  | 0.77142700    | 0.44114500  |
| O  | -3.02780600 | -1.87141100   | -0.11769100 |
| Ni | 3.50745200  | 0.15012817200 | 0.22436300  |

## Molecule:Ni-GLU-032

|    |             |             |             |
|----|-------------|-------------|-------------|
| N  | 2.78456000  | 1.64257000  | -0.39719400 |
| H  | 2.67918800  | 1.63459200  | -1.41492100 |
| H  | 3.65106800  | 1.14653900  | -0.16698900 |
| H  | 2.84386500  | 2.61426500  | -0.08838400 |
| C  | 1.63377900  | 0.94424300  | 0.26045600  |
| H  | 1.70062600  | 1.19759000  | 1.31963400  |
| C  | 0.31313500  | 1.44225400  | -0.31911300 |
| C  | 1.92553900  | -0.56479700 | 0.16438800  |
| H  | 0.44597900  | 2.47148400  | -0.65093000 |
| H  | 0.07296300  | 0.85614700  | -1.20737400 |
| C  | -0.83987700 | 1.40584400  | 0.70634400  |
| O  | 0.95215500  | -1.39656800 | 0.26191000  |
| H  | -0.61491800 | 0.69209200  | 1.50202700  |
| H  | -0.96595500 | 2.38295500  | 1.16602900  |
| C  | -2.14663700 | 0.97881400  | 0.07239800  |
| O  | -3.09039900 | 1.75371000  | -0.06971500 |
| O  | -2.21776200 | -0.26361500 | -0.32985700 |
| O  | 3.09955400  | -0.91827300 | 0.06263700  |
| Ni | -0.87745500 | -1.54049400 | -0.08519200 |



## Molecule:Zn-GLU-01

|    |             |             |             |
|----|-------------|-------------|-------------|
| N  | 0.00071300  | 2.85926500  | 0.07331100  |
| H  | 0.19415400  | 2.85021400  | -0.93170800 |
| H  | 0.81155600  | 3.26990700  | 0.54157700  |
| H  | -0.81284700 | 3.45383600  | 0.24657300  |
| C  | -0.26559200 | 1.46634200  | 0.55881000  |
| H  | -0.39908900 | 1.52503600  | 1.63656400  |
| C  | -1.53646200 | 0.94764300  | -0.11972200 |
| C  | 0.94947100  | 0.61367500  | 0.24455500  |
| H  | -2.30734700 | 1.70767300  | 0.01980200  |
| H  | -1.35269400 | 0.86495100  | -1.19310900 |
| C  | -2.02455600 | -0.37733400 | 0.44449900  |
| O  | 1.73429500  | 0.96223300  | -0.66963100 |
| H  | -1.29681900 | -1.16945900 | 0.26325500  |
| H  | -2.13204500 | -0.30624500 | 1.53023600  |
| C  | -3.36817900 | -0.85714500 | -0.11570200 |
| O  | -3.77947800 | -1.97103700 | 0.31613700  |
| O  | -3.97772100 | -0.13726600 | -0.95107700 |
| O  | 1.11457800  | -0.45719500 | 0.90368700  |
| Zn | 2.80095500  | -1.00479100 | -0.18313100 |

## Molecule:Zn-GLU-02

|    |             |             |             |
|----|-------------|-------------|-------------|
| N  | -3.46850300 | 1.68073700  | -0.24086700 |
| H  | -3.64702700 | 1.68671700  | 0.76950100  |
| H  | -4.37387400 | 1.66035000  | -0.71302900 |
| H  | -2.97679400 | 2.53267000  | -0.51561800 |
| C  | -2.67211800 | 0.45028400  | -0.55559300 |
| H  | -2.77697100 | 0.26212600  | -1.62099800 |
| C  | -1.21340400 | 0.71618100  | -0.19007500 |
| C  | -3.27578400 | -0.71794100 | 0.25205100  |
| H  | -0.88983900 | 1.61630200  | -0.71644200 |
| H  | -1.14764500 | 0.92227700  | 0.88046900  |
| C  | -0.29812600 | -0.44210000 | -0.55776800 |
| O  | -3.80600000 | -0.41735900 | 1.35141000  |
| H  | -0.58199300 | -1.35733100 | -0.03700100 |
| H  | -0.36827900 | -0.66886200 | -1.62508400 |
| C  | 1.15566700  | -0.19980300 | -0.25777700 |
| O  | 1.98696000  | -1.14340200 | -0.45611200 |
| O  | 1.56894400  | 0.91299400  | 0.18311100  |
| O  | -3.15636100 | -1.85985500 | -0.24685900 |
| Zn | 3.53720600  | 0.09339500  | 0.21556100  |

## Molecule:Zn-GLU-03

|    |             |             |             |
|----|-------------|-------------|-------------|
| N  | 2.52325400  | 1.12825800  | -1.26010100 |
| H  | 2.23915300  | 0.36466500  | -1.88020400 |
| H  | 3.50642300  | 0.99484300  | -1.01242700 |
| H  | 2.44000200  | 2.00753000  | -1.77676800 |
| C  | 1.64740000  | 1.15679800  | -0.03780700 |
| H  | 2.06559700  | 1.91174400  | 0.62190100  |
| C  | 0.23579900  | 1.51971200  | -0.48282400 |
| C  | 1.77897600  | -0.21958700 | 0.65729800  |
| H  | 0.25734900  | 2.51570500  | -0.92536000 |
| H  | -0.05161000 | 0.82160800  | -1.27244400 |
| C  | -0.80188600 | 1.47082800  | 0.65594200  |
| O  | 1.32880500  | -1.24362800 | 0.01645700  |
| H  | -0.43947300 | 0.84215100  | 1.47419300  |
| H  | -0.97783000 | 2.46380100  | 1.06074500  |
| C  | -2.13201900 | 0.87284200  | 0.20961100  |
| O  | -3.16286500 | 1.55700900  | 0.24937200  |
| O  | -2.15125200 | -0.35999900 | -0.19661100 |
| O  | 2.33474700  | -0.26532900 | 1.75350100  |
| Zn | -0.59558300 | -1.53759400 | -0.26880000 |



## Molecule: Cd-ARG-01

|    |             |             |             |
|----|-------------|-------------|-------------|
| N  | 1.21580800  | 3.36335400  | -0.00085000 |
| H  | 2.09945000  | 3.56126200  | 0.47319600  |
| H  | 0.58473100  | 4.15509700  | 0.14204100  |
| H  | 1.41497700  | 3.27718600  | -1.00094500 |
| C  | 0.59888600  | 2.10072100  | 0.51730400  |
| H  | 0.47974500  | 2.22409200  | 1.59152600  |
| C  | -0.76124200 | 1.90379400  | -0.15521900 |
| C  | 1.55928000  | 0.95135000  | 0.24708300  |
| H  | -1.31011800 | 2.84342800  | -0.05433300 |
| H  | -0.60736500 | 1.72774800  | -1.22318100 |
| C  | -1.58303900 | 0.77576600  | 0.45551200  |
| O  | 2.46799800  | 1.09255000  | -0.60236400 |
| H  | -1.06249600 | -0.17572500 | 0.34952600  |
| H  | -1.72000400 | 0.95861500  | 1.52464200  |
| C  | -2.93964400 | 0.67378800  | -0.21961600 |
| H  | -3.47997600 | 1.62029400  | -0.14015600 |
| H  | -2.80248100 | 0.45052600  | -1.27984400 |
| N  | -3.71827800 | -0.39336600 | 0.40196100  |
| H  | -3.37320200 | -0.78788000 | 1.26511400  |
| C  | -4.88761000 | -0.83541300 | -0.04419100 |
| N  | -5.42984700 | -0.33219400 | -1.14976000 |
| N  | -5.53942000 | -1.78257000 | 0.63530600  |
| H  | -4.96436400 | 0.38388300  | -1.68185300 |
| H  | -6.28911600 | -0.71704100 | -1.50884300 |
| H  | -5.09077900 | -2.23896000 | 1.41359500  |
| H  | -6.36750700 | -2.20206000 | 0.24378200  |
| O  | 1.36456900  | -0.12382200 | 0.88797400  |
| Cd | 3.00438200  | -1.29660200 | -0.13356200 |

## Molecule: Cd-ARG-02

|    |             |             |             |
|----|-------------|-------------|-------------|
| N  | -2.35051800 | 2.82506400  | -0.89268100 |
| H  | -3.33331900 | 2.63216900  | -1.09753100 |
| H  | -1.92732000 | 3.27016800  | -1.71025800 |
| H  | -2.32083500 | 3.47399500  | -0.09987000 |
| C  | -1.62038100 | 1.57335100  | -0.52198200 |
| H  | -1.84919600 | 0.82945900  | -1.28284800 |
| C  | -0.12341000 | 1.87428700  | -0.48834900 |
| C  | -2.14833300 | 1.11806700  | 0.84403500  |
| H  | 0.15268600  | 2.28833300  | -1.46157700 |
| H  | 0.06158000  | 2.64780600  | 0.26170600  |
| C  | 0.73809900  | 0.65317100  | -0.19665500 |
| O  | -2.53644800 | 1.98592800  | 1.63426600  |
| H  | 0.50732700  | 0.25123800  | 0.79094300  |
| H  | 0.52660800  | -0.13292900 | -0.93026100 |
| C  | 2.21152600  | 1.01646800  | -0.25258400 |
| H  | 2.45826400  | 1.43262400  | -1.23218300 |
| H  | 2.43071600  | 1.77551400  | 0.50165100  |
| N  | 3.02988800  | -0.16596600 | 0.00103400  |
| H  | 2.56754900  | -1.06099700 | 0.06597800  |
| C  | 4.35144200  | -0.14883400 | 0.13132500  |
| N  | 5.03114000  | 0.98852700  | 0.01378000  |
| N  | 5.00794800  | -1.28044400 | 0.39032800  |
| H  | 4.56155000  | 1.86032000  | -0.16234100 |
| H  | 6.02647300  | 0.99690400  | 0.16961000  |
| H  | 4.51124400  | -2.15425900 | 0.45436600  |
| H  | 6.01398600  | -1.28671100 | 0.42872600  |
| O  | -2.12892200 | -0.13288800 | 1.11374700  |
| Cd | -1.63640000 | -1.76536000 | -0.21587900 |

## Molecule: Cu-ARG-01

|    |             |             |             |
|----|-------------|-------------|-------------|
| N  | 2.13793900  | 2.76891800  | -0.24612900 |
| H  | 3.03856100  | 2.89606000  | 0.22080400  |
| H  | 1.67236500  | 3.67836900  | -0.30299000 |
| H  | 2.31621400  | 2.43870500  | -1.19831800 |
| C  | 1.27228300  | 1.79545800  | 0.49359400  |
| H  | 1.15629300  | 2.17723100  | 1.50451200  |
| C  | -0.07791400 | 1.70206700  | -0.21834900 |
| C  | 1.96090300  | 0.44037200  | 0.56980800  |
| H  | -0.51932800 | 2.70132500  | -0.21246200 |
| H  | 0.09539200  | 1.42240500  | -1.26076300 |
| C  | -1.03032800 | 0.70998100  | 0.43660600  |
| O  | 2.65376800  | 0.10994100  | -0.47343000 |
| H  | -0.60841300 | -0.29579800 | 0.40088700  |
| H  | -1.17175200 | 0.96653800  | 1.48933100  |
| C  | -2.37461100 | 0.69837700  | -0.26893100 |
| H  | -2.84337400 | 1.68357500  | -0.21262900 |
| H  | -2.23887700 | 0.44946300  | -1.32412100 |
| N  | -3.24357300 | -0.29546000 | 0.35705800  |
| H  | -2.89563800 | -0.77803200 | 1.17274000  |
| C  | -4.47015400 | -0.59625600 | -0.05052700 |
| N  | -5.00108800 | -0.00751000 | -1.11834100 |
| N  | -5.19308600 | -1.48968000 | 0.63281200  |
| H  | -4.50501700 | 0.70457500  | -1.62742800 |
| H  | -5.94015300 | -0.23765500 | -1.40139400 |
| H  | -4.74927200 | -2.03719200 | 1.35334600  |
| H  | -6.05530900 | -1.83421900 | 0.24036400  |
| O  | 1.79891600  | -0.28238800 | 1.54925700  |
| Cu | 3.27739400  | -1.65136800 | -0.36550000 |

## Molecule: Cu-ARG-02

|    |             |             |             |
|----|-------------|-------------|-------------|
| N  | 2.87272700  | -2.25851600 | -0.87088700 |
| H  | 3.80836200  | -1.96429300 | -1.15992000 |
| H  | 2.45929600  | -2.81620500 | -1.62140300 |
| H  | 2.97734600  | -2.84543500 | -0.03812500 |
| C  | 2.00610300  | -1.08199700 | -0.55148700 |
| H  | 2.03410500  | -0.41535900 | -1.41210300 |
| C  | 0.58194100  | -1.57906900 | -0.29646400 |
| C  | 2.61878400  | -0.38994000 | 0.66689100  |
| H  | 0.31577600  | -2.24223200 | -1.12306400 |
| H  | 0.57214800  | -2.17521000 | 0.61917700  |
| C  | -0.43671300 | -0.45272700 | -0.21286300 |
| O  | 3.25016300  | -1.05479300 | 1.48355000  |
| H  | -0.18938100 | 0.22045300  | 0.61323200  |
| H  | -0.40271400 | 0.13545100  | -1.13549800 |
| C  | -1.84251700 | -0.98750100 | -0.01444300 |
| H  | -2.09470700 | -1.68129900 | -0.81952400 |
| H  | -1.90338500 | -1.53033600 | 0.93169000  |
| N  | -2.79366200 | 0.12108100  | -0.00883300 |
| H  | -2.43406400 | 1.05178700  | -0.16264200 |
| C  | -4.10951400 | -0.01735600 | 0.10684400  |
| N  | -4.64916800 | -1.21676900 | 0.30895100  |
| N  | -4.90257700 | 1.05071200  | -0.00908500 |
| H  | -4.07250200 | -2.02488700 | 0.47321700  |
| H  | -5.64442700 | -1.30428300 | 0.44006100  |
| H  | -4.49751700 | 1.96902200  | -0.09737600 |
| H  | -5.88088800 | 0.97756100  | 0.22039700  |
| O  | 2.43528800  | 0.88149800  | 0.80393800  |
| Cu | 1.47824900  | 2.04164200  | -0.28137600 |

## Molecule: Fe-ARG-02

|    |             |             |             |
|----|-------------|-------------|-------------|
| N  | 2.91157300  | -2.24730000 | -0.83833100 |
| H  | 3.84490800  | -1.94821900 | -1.13222100 |
| H  | 2.50405500  | -2.81796500 | -1.58324400 |
| H  | 3.01765600  | -2.83107900 | -0.00315600 |
| C  | 2.02647900  | -1.07851500 | -0.54553000 |
| H  | 2.02182400  | -0.44245900 | -1.42918800 |
| C  | 0.62189900  | -1.59475700 | -0.22924500 |
| C  | 2.65185100  | -0.32631800 | 0.62432500  |
| H  | 0.31618100  | -2.21483600 | -1.07521100 |
| H  | 0.67241300  | -2.23795700 | 0.65222700  |
| C  | -0.38867900 | -0.47963600 | -0.02201000 |
| O  | 3.30790200  | -0.88307700 | 1.47395700  |
| H  | -0.14684300 | 0.09128200  | 0.87757900  |
| H  | -0.34798600 | 0.21333800  | -0.86986400 |
| C  | -1.80465900 | -1.01528500 | 0.09329100  |
| H  | -2.04556400 | -1.61643900 | -0.78555500 |
| H  | -1.89930200 | -1.65071200 | 0.97677800  |
| N  | -2.73454800 | 0.10691800  | 0.18412600  |
| H  | -2.34452300 | 1.03633300  | 0.23897600  |
| C  | -4.05595500 | 0.00350300  | 0.09628800  |
| N  | -4.63892200 | -1.19024000 | 0.02409500  |
| N  | -4.80606300 | 1.10694800  | 0.05792300  |
| H  | -4.10568400 | -2.03653200 | 0.13288300  |
| H  | -5.64336100 | -1.25691400 | -0.02080800 |
| H  | -4.37646500 | 2.01343400  | 0.14895200  |
| H  | -5.80862500 | 1.03731700  | 0.12783000  |
| O  | 2.42859900  | 0.98094800  | 0.67211600  |
| Fe | 1.50074600  | 2.16885400  | -0.36622900 |

## Molecule: Fe-ARG-011

|    |             |             |             |
|----|-------------|-------------|-------------|
| N  | 2.22273200  | 2.82067100  | -0.03229000 |
| H  | 3.14906800  | 2.87581300  | 0.39995900  |
| H  | 1.72623700  | 3.69527600  | 0.15870800  |
| H  | 2.34624900  | 2.73860600  | -1.04618800 |
| C  | 1.43404600  | 1.67274700  | 0.50676700  |
| H  | 1.38056500  | 1.78863600  | 1.58776000  |
| C  | 0.02849000  | 1.68666000  | -0.10792600 |
| C  | 2.16151700  | 0.39711300  | 0.20882600  |
| H  | -0.40346200 | 2.65880600  | 0.14032800  |
| H  | 0.12195600  | 1.62862200  | -1.19455200 |
| C  | -0.86831000 | 0.56783000  | 0.40835300  |
| O  | 2.98873400  | 0.26736200  | -0.73729300 |
| H  | -0.48877300 | -0.40046700 | 0.07772500  |
| H  | -0.87184600 | 0.56351400  | 1.50038800  |
| C  | -2.28564700 | 0.74251600  | -0.10895700 |
| H  | -2.72688000 | 1.64603600  | 0.31663100  |
| H  | -2.27548800 | 0.85277600  | -1.19618000 |
| N  | -3.09591800 | -0.41634100 | 0.25846400  |
| H  | -2.62623200 | -1.21697700 | 0.65610100  |
| C  | -4.38215800 | -0.54900200 | -0.04880000 |
| N  | -5.04018300 | 0.44730700  | -0.63627900 |
| N  | -5.01812300 | -1.68906000 | 0.22066100  |
| H  | -4.60129500 | 1.34003600  | -0.78535000 |
| H  | -6.02627200 | 0.35861000  | -0.82305800 |
| H  | -4.53274000 | -2.45504500 | 0.65911000  |
| H  | -6.00563100 | -1.77399300 | 0.04119400  |
| O  | 1.94271300  | -0.65192800 | 0.90519000  |
| Fe | 3.16830000  | -1.78726700 | -0.21766200 |

## Molecule: Hg-ARG-01

|    |             |             |             |
|----|-------------|-------------|-------------|
| N  | 0.31721600  | 3.37474500  | -0.18092200 |
| H  | 1.13676400  | 3.69977200  | 0.33686800  |
| H  | -0.34212800 | 4.15265900  | -0.26212800 |
| H  | 0.62233400  | 3.10864500  | -1.12097600 |
| C  | -0.33503100 | 2.21682400  | 0.50907700  |
| H  | -0.57593600 | 2.54658400  | 1.51636000  |
| C  | -1.60237700 | 1.84124200  | -0.25639800 |
| C  | 0.64619500  | 1.04923400  | 0.61366600  |
| H  | -2.23051700 | 2.73509300  | -0.29058100 |
| H  | -1.33499100 | 1.58867800  | -1.28535400 |
| C  | -2.37756500 | 0.69435800  | 0.38160500  |
| O  | 1.51567600  | 0.99671000  | -0.34046300 |
| H  | -1.80881500 | -0.23396200 | 0.30420400  |
| H  | -2.53346900 | 0.89564700  | 1.44395700  |
| C  | -3.72179700 | 0.51554300  | -0.30184900 |
| H  | -4.32810500 | 1.41398600  | -0.16802900 |
| H  | -3.58018800 | 0.36016200  | -1.37438800 |
| N  | -4.42230100 | -0.63235500 | 0.26777100  |
| H  | -3.94615800 | -1.18351100 | 0.96714900  |
| C  | -5.65104700 | -1.00305500 | -0.07006600 |
| N  | -6.33370600 | -0.33014900 | -0.99189400 |
| N  | -6.21835500 | -2.05098000 | 0.53462700  |
| H  | -5.94533200 | 0.48321500  | -1.43930700 |
| H  | -7.27609000 | -0.60320600 | -1.22052600 |
| H  | -5.66362800 | -2.63735500 | 1.13811300  |
| H  | -7.08613200 | -2.42125800 | 0.18024300  |
| O  | 0.53648400  | 0.24847500  | 1.53591800  |
| Hg | 2.79156100  | -0.72850400 | -0.13690700 |

## Molecule: Hg-ARG-02

|    |             |             |             |
|----|-------------|-------------|-------------|
| N  | -1.85609400 | 3.25659100  | -0.95001000 |
| H  | -2.84303100 | 3.10726200  | -1.17147700 |
| H  | -1.39552500 | 3.66060400  | -1.76856100 |
| H  | -1.80978800 | 3.92593100  | -0.17497700 |
| C  | -1.19321100 | 1.98008100  | -0.53978300 |
| H  | -1.44084800 | 1.23018300  | -1.28882600 |
| C  | 0.31688100  | 2.21014800  | -0.47426200 |
| C  | -1.77151100 | 1.59121900  | 0.82229900  |
| H  | 0.63476600  | 2.59257400  | -1.44705600 |
| H  | 0.52295600  | 2.98475100  | 0.26902200  |
| C  | 1.09070700  | 0.94303100  | -0.14562300 |
| O  | -2.13328800 | 2.48358400  | 1.58743600  |
| H  | 0.81441700  | 0.57512700  | 0.84325600  |
| H  | 0.82807000  | 0.16180100  | -0.86801000 |
| C  | 2.59189300  | 1.16790500  | -0.18680800 |
| H  | 2.88740000  | 1.58900500  | -1.15068700 |
| H  | 2.88273500  | 1.87313300  | 0.59434500  |
| N  | 3.27185800  | -0.10766600 | 0.02601200  |
| H  | 2.70537400  | -0.94363900 | 0.02789400  |
| C  | 4.58623200  | -0.26972000 | 0.12413700  |
| N  | 5.40935200  | 0.77405300  | 0.08843200  |
| N  | 5.09078600  | -1.50249800 | 0.23704400  |
| H  | 5.06242300  | 1.71353900  | -0.00745600 |
| H  | 6.40267100  | 0.63515400  | 0.18276700  |
| H  | 4.47113200  | -2.28266300 | 0.38843500  |
| H  | 6.06733400  | -1.62299200 | 0.45488500  |
| O  | -1.82889000 | 0.34451600  | 1.15787000  |
| Hg | -1.39037400 | -1.30629900 | -0.12820100 |

## Molecule: Mn-ARG-01

|    |             |             |             |
|----|-------------|-------------|-------------|
| N  | 2.03068900  | 2.86656800  | 0.01773400  |
| H  | 2.91319700  | 2.99413200  | 0.51704800  |
| H  | 1.47070100  | 3.71550500  | 0.12510500  |
| H  | 2.25172100  | 2.73829600  | -0.97321200 |
| C  | 1.28768500  | 1.67283400  | 0.53616000  |
| H  | 1.17244100  | 1.81365800  | 1.60813900  |
| C  | -0.07713400 | 1.61075400  | -0.14670800 |
| C  | 2.13240700  | 0.42998700  | 0.28125400  |
| H  | -0.57433500 | 2.56843000  | 0.03056700  |
| H  | 0.06925000  | 1.51297200  | -1.22534700 |
| C  | -0.96047400 | 0.48013200  | 0.36759100  |
| O  | 2.95270300  | 0.44959600  | -0.67929600 |
| H  | -0.54717700 | -0.48636600 | 0.07468800  |
| H  | -0.99816900 | 0.50318700  | 1.45910200  |
| C  | -2.36600800 | 0.61650400  | -0.19091800 |
| H  | -2.81292500 | 1.54903400  | 0.16035300  |
| H  | -2.33363200 | 0.64918700  | -1.28303000 |
| N  | -3.19419700 | -0.50693100 | 0.23982700  |
| H  | -2.74958500 | -1.26916900 | 0.73022200  |
| C  | -4.48330200 | -0.63104000 | -0.05219600 |
| N  | -5.11179400 | 0.31526200  | -0.74465300 |
| N  | -5.16224100 | -1.70228000 | 0.36501700  |
| H  | -4.63672400 | 1.15800700  | -1.02060500 |
| H  | -6.09782700 | 0.23278800  | -0.93394600 |
| H  | -4.67358100 | -2.47599700 | 0.78656000  |
| H  | -6.11343300 | -1.84061000 | 0.06313700  |
| O  | 1.96111400  | -0.56366900 | 1.02918800  |
| Mn | 3.64853200  | -1.77335300 | -0.27337900 |

## Molecule: Ni-ARG-01

|    |             |             |             |
|----|-------------|-------------|-------------|
| N  | 2.14446500  | 2.78806400  | 0.08118500  |
| H  | 3.04642300  | 2.83871500  | 0.56195500  |
| H  | 1.63546700  | 3.65796900  | 0.25718000  |
| H  | 2.32635100  | 2.71814000  | -0.92436700 |
| C  | 1.33804700  | 1.62376000  | 0.56014900  |
| H  | 1.22305000  | 1.72889000  | 1.63682200  |
| C  | -0.02730400 | 1.63336500  | -0.13639100 |
| C  | 2.10419900  | 0.36089400  | 0.26970100  |
| H  | -0.44063200 | 2.63675100  | -0.01025600 |
| H  | 0.12005300  | 1.46847800  | -1.20628700 |
| C  | -0.99196100 | 0.60539100  | 0.43824500  |
| O  | 2.95906400  | 0.31885700  | -0.66901800 |
| H  | -0.58299400 | -0.40065800 | 0.33328500  |
| H  | -1.13185200 | 0.79267400  | 1.50584900  |
| C  | -2.33673900 | 0.66605100  | -0.26522400 |
| H  | -2.76598200 | 1.66741800  | -0.18129200 |
| H  | -2.21405300 | 0.44021400  | -1.32693400 |
| N  | -3.24069300 | -0.30770400 | 0.34121500  |
| H  | -2.91213500 | -0.81483300 | 1.14974000  |
| C  | -4.49222600 | -0.52808000 | -0.04385500 |
| N  | -5.00786600 | 0.10582300  | -1.09378300 |
| N  | -5.24241000 | -1.40097200 | 0.62990200  |
| H  | -4.47930500 | 0.79410000  | -1.60258400 |
| H  | -5.96769300 | -0.05534600 | -1.35439000 |
| H  | -4.85429900 | -1.90937400 | 1.40800200  |
| H  | -6.18137300 | -1.60645100 | 0.32929200  |
| O  | 1.88239800  | -0.70043400 | 0.92461400  |
| Ni | 3.22531200  | -1.62031500 | -0.25950600 |

## Molecule: Mn-ARG-24

|    |             |             |             |
|----|-------------|-------------|-------------|
| N  | 2.95076700  | -2.16835600 | -0.81723500 |
| H  | 3.89188600  | -1.87184500 | -1.08308400 |
| H  | 2.56203400  | -2.73808700 | -1.57111200 |
| H  | 3.03310500  | -2.73315100 | 0.03517800  |
| C  | 2.07888700  | -0.99106500 | -0.51210900 |
| H  | 2.24815600  | -0.25152100 | -1.29228700 |
| C  | 0.62441700  | -1.45807200 | -0.50105600 |
| C  | 2.52078500  | -0.43564700 | 0.85230300  |
| H  | 0.41028200  | -1.89390400 | -1.48072500 |
| H  | 0.52218100  | -2.25439800 | 0.24115000  |
| C  | -0.37897900 | -0.35048800 | -0.20630500 |
| O  | 2.96542400  | -1.24601900 | 1.68140600  |
| H  | -0.20799700 | 0.06162700  | 0.78951200  |
| H  | -0.25850200 | 0.46792100  | -0.92449200 |
| C  | -1.79864300 | -0.88166700 | -0.28337600 |
| H  | -2.00182300 | -1.27675700 | -1.28158000 |
| H  | -1.92297700 | -1.69681800 | 0.43300900  |
| N  | -2.74565600 | 0.18497200  | 0.02852900  |
| H  | -2.38367600 | 1.11933000  | 0.15099500  |
| C  | -4.05680100 | 0.01139100  | 0.14237500  |
| N  | -4.59910900 | -1.18628500 | -0.06115800 |
| N  | -4.83973900 | 1.04120000  | 0.47506200  |
| H  | -4.02266000 | -1.99111200 | -0.24124300 |
| H  | -5.58342400 | -1.32775000 | 0.10126700  |
| H  | -4.45499800 | 1.97170700  | 0.51038800  |
| H  | -5.84133200 | 0.93949500  | 0.43317700  |
| O  | 2.37195800  | 0.81059800  | 1.05127900  |
| Mn | 1.68035400  | 2.25964800  | -0.44036100 |

## Molecule: Ni-ARG-02

|    |             |             |             |
|----|-------------|-------------|-------------|
| N  | 2.81362000  | -2.34055600 | -0.77759000 |
| H  | 3.75497700  | -2.05929300 | -1.06244000 |
| H  | 2.40859900  | -2.91631000 | -1.51956600 |
| H  | 2.90032800  | -2.90832000 | 0.07068100  |
| C  | 1.94802400  | -1.15143300 | -0.50986500 |
| H  | 1.99952400  | -0.51413700 | -1.39103600 |
| C  | 0.51332400  | -1.62458900 | -0.27585100 |
| C  | 2.53060500  | -0.43190500 | 0.70468400  |
| H  | 0.22076300  | -2.20766100 | -1.15252200 |
| H  | 0.49879200  | -2.29393100 | 0.58757400  |
| C  | -0.46676900 | -0.47808300 | -0.07515300 |
| O  | 3.07819500  | -1.06280400 | 1.59122000  |
| H  | -0.25065900 | 0.04564000  | 0.85873700  |
| H  | -0.35923500 | 0.24559000  | -0.89098200 |
| C  | -1.89985900 | -0.97875300 | -0.04563900 |
| H  | -2.14191600 | -1.46413600 | -0.99331200 |
| H  | -2.02635900 | -1.71170900 | 0.75483100  |
| N  | -2.80251300 | 0.14788400  | 0.16782300  |
| H  | -2.39322300 | 1.05285900  | 0.34778900  |
| C  | -4.12723400 | 0.07497700  | 0.11263800  |
| N  | -4.73275700 | -1.08835400 | -0.10747100 |
| N  | -4.85893800 | 1.18346700  | 0.25680300  |
| H  | -4.20526100 | -1.93637700 | -0.22857400 |
| H  | -5.73777700 | -1.13370000 | -0.15614500 |
| H  | -4.41163300 | 2.04682300  | 0.52016400  |
| H  | -5.85998000 | 1.11447700  | 0.34775400  |
| O  | 2.39896300  | 0.86963900  | 0.76375600  |
| Ni | 1.70933400  | 2.08596900  | -0.39909300 |

## Molecule: Zn-ARG-01

|    |             |             |             |
|----|-------------|-------------|-------------|
| N  | 2.09240700  | 2.88305500  | -0.06140100 |
| H  | 2.99501200  | 2.98040100  | 0.40918100  |
| H  | 1.58767600  | 3.76917700  | 0.02032500  |
| H  | 2.27099500  | 2.69976000  | -1.05258300 |
| C  | 1.28580300  | 1.77224300  | 0.53572800  |
| H  | 1.19134400  | 1.98181500  | 1.59812700  |
| C  | -0.08788600 | 1.74272300  | -0.13881800 |
| C  | 2.02771500  | 0.46183700  | 0.34577700  |
| H  | -0.52407200 | 2.73852900  | -0.02866200 |
| H  | 0.05152700  | 1.55902900  | -1.20726700 |
| C  | -1.02465100 | 0.70123300  | 0.45855800  |
| O  | 2.77527200  | 0.32616900  | -0.67453500 |
| H  | -0.59097800 | -0.29522200 | 0.36295500  |
| H  | -1.16227000 | 0.89616700  | 1.52510500  |
| C  | -2.37360100 | 0.71647300  | -0.23855900 |
| H  | -2.83936900 | 1.70087800  | -0.15023400 |
| H  | -2.24524200 | 0.49851500  | -1.30142800 |
| N  | -3.24207900 | -0.29355800 | 0.36245000  |
| H  | -2.89597900 | -0.79196000 | 1.16935800  |
| C  | -4.47258800 | -0.57761800 | -0.04493600 |
| N  | -5.00602400 | 0.03658600  | -1.09710100 |
| N  | -5.19750200 | -1.48140500 | 0.62332200  |
| H  | -4.51207000 | 0.76243400  | -1.58844900 |
| H  | -5.95073600 | -0.17707200 | -1.37435900 |
| H  | -4.74942600 | -2.05285500 | 1.32249500  |
| H  | -6.05948300 | -1.81729500 | 0.22262400  |
| O  | 1.84179800  | -0.46945900 | 1.16065500  |
| Zn | 3.12800500  | -1.67400200 | -0.27045100 |

## Molecule: Zn-ARG-021

|    |             |             |             |
|----|-------------|-------------|-------------|
| N  | 2.83431100  | -2.32008300 | -0.80016900 |
| H  | 3.78808000  | -2.04598400 | -1.04579600 |
| H  | 2.44498000  | -2.86953000 | -1.56942900 |
| H  | 2.88743400  | -2.90702200 | 0.03806100  |
| C  | 1.98335500  | -1.12401400 | -0.51313700 |
| H  | 2.10524200  | -0.43227200 | -1.34566500 |
| C  | 0.52865500  | -1.57977700 | -0.39244500 |
| C  | 2.49363200  | -0.48499700 | 0.78171500  |
| H  | 0.26525600  | -2.08868100 | -1.32316400 |
| H  | 0.45993000  | -2.31348100 | 0.41513000  |
| C  | -0.45179200 | -0.44100900 | -0.14182200 |
| O  | 3.02364000  | -1.20744000 | 1.62869500  |
| H  | -0.27268100 | 0.00490800  | 0.83760100  |
| H  | -0.30835000 | 0.34737700  | -0.89006700 |
| C  | -1.88288200 | -0.94365700 | -0.20437300 |
| H  | -2.08445700 | -1.39107100 | -1.18045200 |
| H  | -2.03412900 | -1.71120300 | 0.55814300  |
| N  | -2.80862600 | 0.16057600  | 0.02999700  |
| H  | -2.42869000 | 1.09416300  | 0.08699300  |
| C  | -4.12472600 | 0.02122600  | 0.13038300  |
| N  | -4.68727800 | -1.17906300 | 0.01465200  |
| N  | -4.89358400 | 1.08925200  | 0.36537900  |
| H  | -4.12451600 | -2.00851500 | -0.07411000 |
| H  | -5.67750000 | -1.28629600 | 0.16782100  |
| H  | -4.49418000 | 2.01231000  | 0.30085000  |
| H  | -5.89521100 | 1.00117300  | 0.29578300  |
| O  | 2.30667100  | 0.77537700  | 0.93635400  |
| Zn | 1.61117000  | 2.03697400  | -0.36743400 |

## Molecule: Cd-HIS-02

|    |             |             |             |
|----|-------------|-------------|-------------|
| N  | -3.28940400 | 0.40244600  | -1.03140700 |
| H  | -3.83754600 | 0.78295000  | -0.25372200 |
| H  | -3.67232300 | -0.51872800 | -1.25433500 |
| H  | -3.39392600 | 1.00760100  | -1.84929400 |
| C  | -1.85778400 | 0.29528600  | -0.61746400 |
| H  | -1.33473900 | -0.26187900 | -1.38982900 |
| C  | -1.29500000 | 1.72343100  | -0.50768600 |
| C  | -1.81716900 | -0.46178100 | 0.71891700  |
| H  | -1.45354800 | 2.22162700  | -1.46439200 |
| H  | -1.85663900 | 2.26874100  | 0.25355800  |
| C  | 0.15367100  | 1.77649700  | -0.19299800 |
| O  | -2.80710000 | -0.38401500 | 1.45419500  |
| N  | 0.65074900  | 1.78658100  | 1.09887900  |
| C  | 1.24314400  | 1.80541600  | -1.01086400 |
| H  | 0.08889000  | 1.74743800  | 1.94028200  |
| C  | 1.97806100  | 1.80956400  | 1.07912100  |
| N  | 2.35463200  | 1.82170200  | -0.19422900 |
| H  | 1.31790000  | 1.81725300  | -2.08247500 |
| H  | 2.62741100  | 1.82166800  | 1.93626700  |
| H  | 3.31730900  | 1.85284800  | -0.50355200 |
| O  | -0.75215400 | -1.10184200 | 1.01616100  |
| Cd | 1.00478900  | -1.47121400 | -0.22962900 |

## Molecule: Cd-HIS-011

|    |             |             |             |
|----|-------------|-------------|-------------|
| N  | 0.83249000  | 3.23829600  | -0.23719400 |
| H  | 0.58319100  | 3.50152200  | 0.72030400  |
| H  | 0.10374000  | 3.60475800  | -0.85330200 |
| H  | 1.72310900  | 3.68111300  | -0.47394800 |
| C  | 0.93536100  | 1.75335100  | -0.36956500 |
| H  | 1.27853600  | 1.55429200  | -1.38355600 |
| C  | 1.95354900  | 1.23263700  | 0.66200000  |
| C  | -0.46817600 | 1.16343500  | -0.20189000 |
| H  | 2.73890900  | 1.97933600  | 0.78046200  |
| H  | 1.46062900  | 1.12638600  | 1.63124600  |
| C  | 2.62765600  | -0.03907900 | 0.28541300  |
| O  | -1.42330200 | 1.90465400  | 0.03793500  |
| N  | 1.95718300  | -1.18197500 | -0.10679500 |
| C  | 3.94942700  | -0.36167700 | 0.28948900  |
| H  | 0.94492100  | -1.19838200 | -0.24751300 |
| C  | 2.82256900  | -2.16021700 | -0.33817600 |
| N  | 4.03843800  | -1.68265900 | -0.09520300 |
| H  | 4.81640800  | 0.22295800  | 0.53623500  |
| H  | 2.58621900  | -3.15581300 | -0.66817500 |
| H  | 4.89261200  | -2.21548000 | -0.19208400 |
| O  | -0.53999200 | -0.10895700 | -0.32908800 |
| Cd | -2.58627100 | -0.74192900 | 0.07479700  |

## Molecule: Cu-HIS-01

|    |             |             |             |
|----|-------------|-------------|-------------|
| N  | 0.78346300  | 3.04204400  | 0.00895800  |
| H  | 1.05241100  | 3.03476900  | -0.97953800 |
| H  | 1.63458500  | 3.15379700  | 0.56646200  |
| H  | 0.18212000  | 3.85434800  | 0.17307100  |
| C  | 0.06343200  | 1.78905600  | 0.37690100  |
| H  | -0.18341200 | 1.85473200  | 1.43471600  |
| C  | -1.22607700 | 1.68803100  | -0.45969500 |
| C  | 0.98476200  | 0.60859400  | 0.18577500  |
| H  | -1.83748200 | 2.55890000  | -0.22238100 |
| H  | -0.97110600 | 1.73409700  | -1.51922900 |
| C  | -1.99165900 | 0.44378400  | -0.18879800 |
| O  | 2.05779900  | 0.68885900  | -0.46398500 |
| N  | -2.08924600 | -0.58279000 | -1.10951400 |
| C  | -2.66062300 | 0.01813000  | 0.91652900  |
| H  | -1.69105600 | -0.57282900 | -2.04019100 |
| C  | -2.77949300 | -1.59430400 | -0.59556900 |
| N  | -3.13361000 | -1.24407400 | 0.63537000  |
| H  | -2.82494000 | 0.49247300  | 1.86635100  |
| H  | -3.01812600 | -2.51896900 | -1.08992800 |
| H  | -3.67238900 | -1.82791500 | 1.26216400  |
| O  | 0.66063300  | -0.50474500 | 0.70890900  |
| Cu | 2.28674600  | -1.36077000 | 0.01498500  |

## Molecule: Cu-HIS-022

|    |             |             |             |
|----|-------------|-------------|-------------|
| N  | 2.95302900  | -1.09916800 | -0.88786700 |
| H  | 3.22534300  | -1.75042100 | -0.14166700 |
| H  | 3.66576300  | -0.36340500 | -0.93462900 |
| H  | 2.95459600  | -1.60498100 | -1.78106700 |
| C  | 1.60008200  | -0.52268800 | -0.61474600 |
| H  | 1.38137100  | 0.18087300  | -1.41851800 |
| C  | 0.57854000  | -1.68391700 | -0.62492100 |
| C  | 1.65361400  | 0.22669900  | 0.72309600  |
| H  | 0.58090100  | -2.11505100 | -1.62916000 |
| H  | 0.91354000  | -2.45415300 | 0.07719600  |
| C  | -0.81540400 | -1.28383200 | -0.28076100 |
| O  | 2.43576900  | -0.14854200 | 1.60221000  |
| N  | -1.32729600 | -1.38211400 | 1.00675100  |
| C  | -1.84263300 | -0.80704000 | -1.05333400 |
| H  | -0.80924800 | -1.70541700 | 1.81897900  |
| C  | -2.59841500 | -0.97935300 | 1.03060400  |
| N  | -2.92515600 | -0.62325700 | -0.21264300 |
| H  | -1.88997800 | -0.58972000 | -2.10806100 |
| H  | -3.24173500 | -0.94783100 | 1.89578300  |
| H  | -3.83942100 | -0.27701800 | -0.48750200 |
| O  | 0.84577900  | 1.23546600  | 0.88527100  |
| Cu | -0.39835300 | 1.89532000  | -0.33153500 |

## Molecule: Fe-HIS-01

|    |             |             |             |
|----|-------------|-------------|-------------|
| N  | -0.50533200 | 2.77873800  | -0.18965100 |
| H  | -0.86040500 | 2.98769700  | 0.74892200  |
| H  | -1.26666400 | 2.92965200  | -0.85811500 |
| H  | 0.24696000  | 3.43918400  | -0.40472200 |
| C  | 0.01648400  | 1.38191600  | -0.27255300 |
| H  | 0.39283800  | 1.24697100  | -1.28819100 |
| C  | 1.14670900  | 1.17355300  | 0.75305800  |
| C  | -1.14225900 | 0.43712400  | -0.11592000 |
| H  | 1.64470600  | 2.13316900  | 0.88923600  |
| H  | 0.72407600  | 0.88523000  | 1.71602200  |
| C  | 2.19077100  | 0.21057400  | 0.31884300  |
| O  | -2.33999600 | 0.85806300  | -0.16017300 |
| N  | 2.02412500  | -1.16214400 | 0.24556700  |
| C  | 3.47327400  | 0.45153000  | -0.06226600 |
| H  | 1.16427300  | -1.65866500 | 0.44527000  |
| C  | 3.15073300  | -1.73431300 | -0.16398900 |
| N  | 4.04178300  | -0.76845200 | -0.35219700 |
| H  | 4.01792200  | 1.37397100  | -0.14517800 |
| H  | 3.31309200  | -2.78708500 | -0.31107700 |
| H  | 4.99518100  | -0.91931500 | -0.65514700 |
| O  | -0.99270700 | -0.81458600 | 0.02149900  |
| Fe | -3.06341000 | -1.05530500 | 0.01166500  |

## Molecule: Fe-HIS-021

|    |             |             |             |
|----|-------------|-------------|-------------|
| N  | 2.91891700  | -1.23326200 | -0.81084700 |
| H  | 3.33382100  | -1.62192900 | 0.04196800  |
| H  | 3.56246600  | -0.52565700 | -1.17452900 |
| H  | 2.83406900  | -1.98102600 | -1.50451400 |
| C  | 1.58297500  | -0.63598800 | -0.52427700 |
| H  | 1.21804400  | -0.19022800 | -1.44699800 |
| C  | 0.63148400  | -1.75648400 | -0.05384100 |
| C  | 1.77865600  | 0.44615600  | 0.52590100  |
| H  | 0.70673000  | -2.56881100 | -0.77827100 |
| H  | 0.96936600  | -2.13557700 | 0.91142500  |
| C  | -0.78924200 | -1.33402700 | 0.03085300  |
| O  | 2.74938600  | 0.47733100  | 1.24710600  |
| N  | -1.41061700 | -0.96440000 | 1.21043200  |
| C  | -1.73020100 | -1.17430500 | -0.94759500 |
| H  | -0.96937100 | -0.94959700 | 2.12249400  |
| C  | -2.66479400 | -0.59796500 | 0.97376000  |
| N  | -2.87382200 | -0.72059400 | -0.33250300 |
| H  | -1.67970400 | -1.35993600 | -2.00474500 |
| H  | -3.38025700 | -0.26839400 | 1.70584300  |
| H  | -3.75514000 | -0.52809500 | -0.79118300 |
| O  | 0.80571100  | 1.33281300  | 0.62543000  |
| Fe | -0.56059300 | 1.86121400  | -0.48308300 |



## Molecule: Hg-HIS-01

|    |             |             |             |
|----|-------------|-------------|-------------|
| N  | 1.02742200  | 3.15810300  | 0.10768900  |
| H  | 0.46943600  | 3.06106600  | 0.96075500  |
| H  | 0.43262400  | 3.57970300  | -0.60945200 |
| H  | 1.80688300  | 3.79394300  | 0.29691800  |
| C  | 1.53760500  | 1.82539500  | -0.33958800 |
| H  | 2.06165900  | 1.97847800  | -1.27847200 |
| C  | 2.50054900  | 1.29442400  | 0.73801800  |
| C  | 0.37211900  | 0.86058300  | -0.57121800 |
| H  | 3.26503200  | 2.05413500  | 0.90261900  |
| H  | 1.95122100  | 1.16233100  | 1.67223100  |
| C  | 3.18143700  | 0.02716400  | 0.37039000  |
| O  | -0.66554200 | 1.12298200  | 0.14796600  |
| N  | 2.65744900  | -1.22762200 | 0.63016600  |
| C  | 4.38210200  | -0.19024100 | -0.23002600 |
| H  | 1.75735800  | -1.40865800 | 1.05597300  |
| C  | 3.48987100  | -2.16870400 | 0.20175600  |
| N  | 4.54406800  | -1.55489200 | -0.32270400 |
| H  | 5.12277300  | 0.50158200  | -0.58637900 |
| H  | 3.33720200  | -3.23097300 | 0.26851500  |
| H  | 5.34391300  | -2.03145200 | -0.71856900 |
| O  | 0.51963300  | -0.07958800 | -1.34080200 |
| Hg | -2.18456900 | -0.37910200 | 0.04570600  |

## Molecule: Hg-HIS-021

|    |             |             |             |
|----|-------------|-------------|-------------|
| N  | -3.41428100 | -0.70918700 | -1.05811400 |
| H  | -4.09103800 | -0.49400700 | -0.31793500 |
| H  | -3.43365100 | -1.71984800 | -1.21382400 |
| H  | -3.70417200 | -0.24314500 | -1.92135500 |
| C  | -2.05381700 | -0.26039000 | -0.63857400 |
| H  | -1.33938600 | -0.67187100 | -1.34667400 |
| C  | -2.03805800 | 1.27741000  | -0.67856800 |
| C  | -1.79944400 | -0.82307800 | 0.76668900  |
| H  | -2.27413600 | 1.58210600  | -1.69816700 |
| H  | -2.82591200 | 1.65501300  | -0.02379300 |
| C  | -0.74252100 | 1.89574500  | -0.29888300 |
| O  | -2.75467100 | -0.95468000 | 1.52850600  |
| N  | -0.43607400 | 2.28736600  | 0.99278100  |
| C  | 0.34735100  | 2.22141200  | -1.05236800 |
| H  | -1.03942400 | 2.16965700  | 1.79767800  |
| C  | 0.77784000  | 2.82466300  | 1.03378100  |
| N  | 1.26636200  | 2.79450200  | -0.20003200 |
| H  | 0.53230600  | 2.10751600  | -2.10467500 |
| H  | 1.27289800  | 3.21331200  | 1.90559700  |
| H  | 2.17839600  | 3.14548000  | -0.46254800 |
| O  | -0.59303800 | -1.12407400 | 1.11776600  |
| Hg | 1.15807000  | -0.84421900 | -0.10899200 |

## Molecule: Mn-HIS-11

|    |             |             |             |
|----|-------------|-------------|-------------|
| N  | 0.58975600  | 3.13118500  | -0.04921200 |
| H  | 1.06830900  | 3.01556200  | -0.94713100 |
| H  | 1.28815500  | 3.42662100  | 0.63658000  |
| H  | -0.11018200 | 3.87178100  | -0.13853100 |
| C  | -0.04428900 | 1.84258800  | 0.36198400  |
| H  | -0.43660600 | 1.97737500  | 1.36609900  |
| C  | -1.18583300 | 1.53303200  | -0.62358400 |
| C  | 1.00336300  | 0.73584500  | 0.35508300  |
| H  | -1.88977100 | 2.36469400  | -0.59547400 |
| H  | -0.77621000 | 1.47241800  | -1.63384000 |
| C  | -1.91373200 | 0.27940300  | -0.30496700 |
| O  | 2.02809200  | 0.87721100  | -0.35969600 |
| N  | -1.57359800 | -0.94969400 | -0.84147700 |
| C  | -2.97407500 | 0.04602900  | 0.51357500  |
| H  | -0.79309200 | -1.11849100 | -1.46343900 |
| C  | -2.37559100 | -1.89510700 | -0.36683900 |
| N  | -3.23467300 | -1.30606600 | 0.45736300  |
| H  | -3.55523900 | 0.71689600  | 1.11879300  |
| H  | -2.33896500 | -2.94245600 | -0.60741800 |
| H  | -3.97327400 | -1.78721500 | 0.95379600  |
| O  | 0.73906500  | -0.29943700 | 1.01853400  |
| Mn | 2.55400600  | -1.47992400 | -0.02153400 |

## Molecule: Mn-HIS-21

|    |             |             |             |
|----|-------------|-------------|-------------|
| N  | 2.94021300  | -0.88011500 | -1.01994800 |
| H  | 3.40289500  | -1.30104600 | -0.20715300 |
| H  | 3.51728400  | -0.09651300 | -1.33209600 |
| H  | 2.88843200  | -1.56627700 | -1.77634800 |
| C  | 1.58335900  | -0.40721600 | -0.60969500 |
| H  | 1.21485100  | 0.25448500  | -1.38953900 |
| C  | 0.67498700  | -1.64139400 | -0.48189300 |
| C  | 1.73654700  | 0.35912500  | 0.71636100  |
| H  | 0.70432700  | -2.17751200 | -1.43063600 |
| H  | 1.07353300  | -2.30186300 | 0.29026700  |
| C  | -0.73959900 | -1.30984900 | -0.18027700 |
| O  | 2.63995100  | -0.00532400 | 1.48470100  |
| N  | -1.24274900 | -1.19464000 | 1.10475700  |
| C  | -1.78512500 | -1.04229200 | -1.01166000 |
| H  | -0.70578500 | -1.31948000 | 1.95400500  |
| C  | -2.52643400 | -0.85628100 | 1.06673700  |
| N  | -2.87083600 | -0.75745100 | -0.21193500 |
| H  | -1.84198500 | -1.02211500 | -2.08431800 |
| H  | -3.16849600 | -0.69778500 | 1.91446200  |
| H  | -3.79990700 | -0.52356400 | -0.53720000 |
| O  | 0.90806000  | 1.29417800  | 0.93802600  |
| Mn | -0.68472200 | 1.98614900  | -0.43563300 |

## Molecule: Ni-HIS-01

|    |             |             |             |
|----|-------------|-------------|-------------|
| N  | -0.49551800 | 2.86056200  | -0.21457500 |
| H  | -0.85538600 | 3.02570900  | 0.73030600  |
| H  | -1.26049200 | 3.02756400  | -0.87406000 |
| H  | 0.24913900  | 3.53775800  | -0.39997000 |
| C  | 0.03286700  | 1.47130300  | -0.35101300 |
| H  | 0.42346500  | 1.37878500  | -1.36447800 |
| C  | 1.14769100  | 1.23707800  | 0.68664600  |
| C  | -1.12148400 | 0.50910500  | -0.20851000 |
| H  | 1.67289800  | 2.18063300  | 0.83125600  |
| H  | 0.69793700  | 0.96476200  | 1.64354900  |
| C  | 2.17311500  | 0.23569100  | 0.28976500  |
| O  | -2.31216300 | 0.91652300  | -0.12061900 |
| N  | 1.91340800  | -1.09922900 | 0.03159700  |
| C  | 3.51785300  | 0.38633700  | 0.15418800  |
| H  | 0.98278300  | -1.50472300 | 0.01064100  |
| C  | 3.04272200  | -1.73555800 | -0.25296200 |
| N  | 4.02886100  | -0.84939200 | -0.17951200 |
| H  | 4.14246500  | 1.25198400  | 0.27555600  |
| H  | 3.13973100  | -2.77642900 | -0.50472000 |
| H  | 5.00384500  | -1.06267500 | -0.34502900 |
| O  | -0.90272800 | -0.74368700 | -0.16063900 |
| Ni | -2.83432500 | -1.08619200 | 0.10270500  |

## Molecule: Ni-HIS-02

|    |             |             |             |
|----|-------------|-------------|-------------|
| N  | -2.79163500 | 1.65461700  | -0.63970800 |
| H  | -3.13186500 | 1.98470000  | 0.26860700  |
| H  | -3.55990600 | 1.14270200  | -1.08036900 |
| H  | -2.55724400 | 2.46609900  | -1.21677300 |
| C  | -1.60885000 | 0.76242400  | -0.47369700 |
| H  | -1.29500300 | 0.47809000  | -1.47733200 |
| C  | -0.50950200 | 1.53667300  | 0.25868300  |
| C  | -2.07226500 | -0.48945700 | 0.27825000  |
| H  | -0.48640000 | 2.56011900  | -0.12942400 |
| H  | -0.73907700 | 1.60479700  | 1.32357200  |
| C  | 0.86985900  | 1.01329300  | 0.08821000  |
| O  | -3.23351400 | -0.58336500 | 0.64783100  |
| N  | 1.85839200  | 1.32909200  | 0.98155900  |
| C  | 1.49812200  | 0.30526000  | -0.92850000 |
| H  | 1.71588600  | 1.81415300  | 1.86200200  |
| C  | 3.04499400  | 0.90310200  | 0.53819200  |
| N  | 2.85780800  | 0.30252400  | -0.61581400 |
| H  | 1.14885800  | 0.10064100  | -1.93033400 |
| H  | 3.98389600  | 1.02032900  | 1.05271600  |
| H  | 3.59099800  | -0.12045100 | -1.17466200 |
| O  | -1.18253000 | -1.39996300 | 0.49382700  |
| Ni | 0.56614700  | -1.58485500 | -0.11715600 |

## Molecule: Zn-HIS-01

|    |             |             |             |
|----|-------------|-------------|-------------|
| N  | -0.43024200 | 3.05061400  | -0.06801700 |
| H  | -0.81251700 | 3.09931800  | 0.88050700  |
| H  | -1.19033800 | 3.26581400  | -0.71779200 |
| H  | 0.29482400  | 3.76539500  | -0.16688900 |
| C  | 0.13145900  | 1.69345400  | -0.33912500 |
| H  | 0.47632300  | 1.68791900  | -1.37021800 |
| C  | 1.31326500  | 1.45552400  | 0.61655600  |
| C  | -0.97888900 | 0.67047100  | -0.17958900 |
| H  | 1.95681200  | 2.33409400  | 0.56608000  |
| H  | 0.94108800  | 1.37371800  | 1.63896000  |
| C  | 2.13772700  | 0.26863200  | 0.27441800  |
| O  | -2.04856600 | 0.99076700  | 0.38492200  |
| N  | 1.91498400  | -0.99816200 | 0.78401900  |
| C  | 3.22927400  | 0.15864400  | -0.52971000 |
| H  | 1.14913300  | -1.25666000 | 1.39281300  |
| C  | 2.81889600  | -1.84721500 | 0.31051200  |
| N  | 3.62596600  | -1.15996100 | -0.48988600 |
| H  | 3.74914900  | 0.89801000  | -1.11067100 |
| H  | 2.88633500  | -2.89648900 | 0.53546100  |
| H  | 4.41878800  | -1.55505800 | -0.97863800 |
| O  | -0.77161900 | -0.49709000 | -0.62637000 |
| Zn | -2.63311500 | -1.17699900 | -0.04130700 |

## Molecule: Zn-HIS-03

|    |             |             |             |
|----|-------------|-------------|-------------|
| N  | -2.95966400 | 1.04439400  | -0.93595100 |
| H  | -3.37599000 | 1.47359900  | -0.10311500 |
| H  | -3.57208800 | 0.28001900  | -1.22896400 |
| H  | -2.92139300 | 1.73576700  | -1.68877100 |
| C  | -1.59817900 | 0.53196000  | -0.60122400 |
| H  | -1.27808200 | -0.10300400 | -1.42256900 |
| C  | -0.65372600 | 1.73591300  | -0.45623300 |
| C  | -1.70342800 | -0.28220700 | 0.69571600  |
| H  | -0.68849800 | 2.30249500  | -1.38682100 |
| H  | -1.01937300 | 2.38096900  | 0.34458100  |
| C  | 0.75652300  | 1.35708600  | -0.18569500 |
| O  | -2.59501500 | 0.00440400  | 1.49590600  |
| N  | 1.29648700  | 1.30517600  | 1.08717000  |
| C  | 1.76690100  | 1.01386500  | -1.03169800 |
| H  | 0.79022300  | 1.49632900  | 1.94296200  |
| C  | 2.57380800  | 0.94637500  | 1.02963200  |
| N  | 2.87585600  | 0.76587800  | -0.25081400 |
| H  | 1.79184700  | 0.94045100  | -2.10323000 |
| H  | 3.23978100  | 0.82770500  | 1.86545300  |
| H  | 3.79064700  | 0.49851100  | -0.59060600 |
| O  | -0.82674200 | -1.19834700 | 0.89334000  |
| Zn | 0.50922800  | -1.86358000 | -0.35829100 |



## Molecule: Cd-LYS-01

|    |             |             |             |
|----|-------------|-------------|-------------|
| N  | 0.05668700  | 3.15198500  | -0.03756400 |
| H  | 0.29440500  | 3.10919700  | -1.03201700 |
| H  | 0.88505200  | 3.47389500  | 0.46729100  |
| H  | -0.69024400 | 3.83800500  | 0.09278200  |
| C  | -0.38208800 | 1.80564900  | 0.45169300  |
| H  | -0.55032800 | 1.90049800  | 1.52211100  |
| C  | -1.67838600 | 1.41982600  | -0.26096900 |
| C  | 0.75254400  | 0.81921100  | 0.22054600  |
| H  | -2.37214700 | 2.25440800  | -0.12931200 |
| H  | -1.48207600 | 1.32475800  | -1.33209500 |
| C  | -2.32087100 | 0.14741000  | 0.27947100  |
| O  | 1.61330200  | 1.07821000  | -0.66130900 |
| H  | -1.70395400 | -0.71871700 | 0.03362600  |
| H  | -2.37446200 | 0.20197500  | 1.37008800  |
| C  | -3.72483200 | -0.04526200 | -0.28537700 |
| H  | -4.34446200 | 0.82004800  | -0.03277500 |
| H  | -3.68463000 | -0.10923000 | -1.37661000 |
| C  | -4.37038400 | -1.29809400 | 0.26863800  |
| H  | -3.82337400 | -2.19566600 | -0.01158800 |
| H  | -4.45748000 | -1.26064700 | 1.35230400  |
| N  | -5.76114000 | -1.45577300 | -0.26900600 |
| H  | -5.74800900 | -1.55149100 | -1.28647000 |
| H  | -6.21574500 | -2.28237200 | 0.12367800  |
| H  | -6.33184300 | -0.63913100 | -0.03930500 |
| O  | 0.78249000  | -0.22415700 | 0.92596000  |
| Cd | 2.78558800  | -0.91591400 | -0.07785300 |

## Molecule: Cd-LYS-02

|    |             |             |             |
|----|-------------|-------------|-------------|
| N  | -1.52318200 | 2.89633300  | -1.02230700 |
| H  | -1.49314200 | 3.56684600  | -0.24760400 |
| H  | -2.50307900 | 2.77030000  | -1.28434700 |
| H  | -1.01898500 | 3.28317700  | -1.82259800 |
| C  | -0.91065800 | 1.60668000  | -0.57305300 |
| H  | -1.16044400 | 0.85498800  | -1.31969000 |
| C  | 0.60321200  | 1.79178700  | -0.47876100 |
| C  | -1.53407100 | 1.24630900  | 0.78049800  |
| H  | 0.95628500  | 2.11152500  | -1.46254800 |
| H  | 0.81334400  | 2.60273000  | 0.22393400  |
| C  | 1.34974300  | 0.53308400  | -0.05425700 |
| O  | -1.87360400 | 2.17161000  | 1.52765300  |
| H  | 1.07642400  | 0.26217700  | 0.96717600  |
| H  | 1.05474800  | -0.30417300 | -0.69748500 |
| C  | 2.86093500  | 0.71860200  | -0.14257200 |
| H  | 3.14469600  | 0.95561700  | -1.17180100 |
| H  | 3.16895600  | 1.56054700  | 0.48390800  |
| C  | 3.58725500  | -0.53234200 | 0.30515700  |
| H  | 3.38180700  | -0.76777500 | 1.34713400  |
| H  | 3.32737100  | -1.39199800 | -0.30907700 |
| N  | 5.07123000  | -0.35470100 | 0.18859500  |
| H  | 5.38745900  | 0.43727800  | 0.75250000  |
| H  | 5.56791000  | -1.18903600 | 0.50596100  |
| H  | 5.33980200  | -0.17487000 | -0.78143400 |
| O  | -1.63800600 | 0.00858800  | 1.08779900  |
| Cd | -1.24010600 | -1.70823000 | -0.19361900 |

## Molecule: Cu-LYS-01

|    |             |             |             |
|----|-------------|-------------|-------------|
| N  | 1.15464700  | 2.87771500  | -0.16505100 |
| H  | 1.33906200  | 2.72212000  | -1.16029700 |
| H  | 2.04601900  | 3.07997200  | 0.29420200  |
| H  | 0.55074600  | 3.69866900  | -0.07432400 |
| C  | 0.48682700  | 1.68415900  | 0.44405000  |
| H  | 0.35973800  | 1.89060700  | 1.50451600  |
| C  | -0.86696900 | 1.45626300  | -0.23834000 |
| C  | 1.38760900  | 0.48959700  | 0.27210100  |
| H  | -1.40464600 | 2.40668400  | -0.21066900 |
| H  | -0.69173000 | 1.20706600  | -1.28812400 |
| C  | -1.71125000 | 0.37627300  | 0.42803900  |
| O  | 2.20750400  | 0.42862500  | -0.69583700 |
| H  | -1.16831600 | -0.57003400 | 0.44404600  |
| H  | -1.90087800 | 0.65427500  | 1.46804200  |
| C  | -3.03438800 | 0.17826500  | -0.30431100 |
| H  | -3.59054000 | 1.11925100  | -0.34034100 |
| H  | -2.84121300 | -0.12574900 | -1.33714500 |
| C  | -3.87900300 | -0.87788100 | 0.37813700  |
| H  | -3.37342400 | -1.84048600 | 0.41292400  |
| H  | -4.15214800 | -0.58641900 | 1.38986500  |
| N  | -5.15967100 | -1.09285300 | -0.37011300 |
| H  | -4.97126800 | -1.40549200 | -1.32523400 |
| H  | -5.73970100 | -1.79895500 | 0.08640200  |
| H  | -5.69848200 | -0.22567300 | -0.42712200 |
| O  | 1.29801200  | -0.50784200 | 1.04330600  |
| Cu | 2.65278900  | -1.44573000 | -0.14994500 |

## Molecule: Cu-LYS-02

|    |             |             |             |
|----|-------------|-------------|-------------|
| N  | 2.17726600  | -2.32460300 | -0.85175900 |
| H  | 2.26101700  | -2.90353300 | -0.01098100 |
| H  | 3.12250200  | -2.06816200 | -1.14531800 |
| H  | 1.74302600  | -2.87745800 | -1.59417700 |
| C  | 1.35369400  | -1.11469900 | -0.54691300 |
| H  | 1.40751600  | -0.45730500 | -1.41365200 |
| C  | -0.08871200 | -1.55761500 | -0.29140300 |
| C  | 1.98874300  | -0.43338800 | 0.66500300  |
| H  | -0.39506500 | -2.16463800 | -1.14732500 |
| H  | -0.10686900 | -2.20301400 | 0.59068500  |
| C  | -1.06506900 | -0.40170700 | -0.11886300 |
| O  | 2.58145300  | -1.11276600 | 1.49854200  |
| H  | -0.79995400 | 0.17988100  | 0.76795900  |
| H  | -0.98398000 | 0.27215000  | -0.98025000 |
| C  | -2.50651300 | -0.87962500 | 0.00945400  |
| H  | -2.77842600 | -1.48124500 | -0.86230300 |
| H  | -2.60675900 | -1.51683000 | 0.89252400  |
| C  | -3.45565100 | 0.29489700  | 0.12393300  |
| H  | -3.23654500 | 0.90898100  | 0.99470600  |
| H  | -3.43086100 | 0.92139700  | -0.76519300 |
| N  | -4.86829900 | -0.18009400 | 0.27602600  |
| H  | -4.97064400 | -0.74477400 | 1.12232000  |
| H  | -5.51642800 | 0.60709400  | 0.33914500  |
| H  | -5.14476300 | -0.75713700 | -0.52123400 |
| O  | 1.86786200  | 0.84845400  | 0.77629400  |
| Cu | 0.94206800  | 2.01671700  | -0.32699100 |

## Molecule: Fe-LYS-01

|    |             |             |             |
|----|-------------|-------------|-------------|
| N  | 1.26935700  | 2.86350900  | -0.14896900 |
| H  | 1.42525500  | 2.73983000  | -1.15417800 |
| H  | 2.17208700  | 3.04856500  | 0.29675200  |
| H  | 0.67352700  | 3.68617100  | -0.01832300 |
| C  | 0.59955200  | 1.66622300  | 0.44546000  |
| H  | 0.49696200  | 1.84382700  | 1.51402400  |
| C  | -0.77401100 | 1.46650100  | -0.21060800 |
| C  | 1.46880400  | 0.46320700  | 0.23928400  |
| H  | -1.31594400 | 2.40586400  | -0.08204200 |
| H  | -0.62839100 | 1.30931100  | -1.28196300 |
| C  | -1.58349300 | 0.32315300  | 0.38907000  |
| O  | 2.23713400  | 0.33065600  | -0.76231200 |
| H  | -1.05643900 | -0.62377900 | 0.25913500  |
| H  | -1.69922500 | 0.48129800  | 1.46418800  |
| C  | -2.95609800 | 0.22350000  | -0.26887700 |
| H  | -3.50388000 | 1.16006100  | -0.13258800 |
| H  | -2.83956600 | 0.06640100  | -1.34492200 |
| C  | -3.75715500 | -0.91787900 | 0.32143900  |
| H  | -3.26992400 | -1.87794100 | 0.16484400  |
| H  | -3.93095800 | -0.78032800 | 1.38649100  |
| N  | -5.10488800 | -1.00804000 | -0.32654700 |
| H  | -5.01295100 | -1.17563500 | -1.33088700 |
| H  | -5.65472800 | -1.76961600 | 0.07457600  |
| H  | -5.62612600 | -0.13776000 | -0.19985400 |
| O  | 1.42161400  | -0.53092600 | 1.03267600  |
| Fe | 2.66782400  | -1.58117800 | -0.15169800 |

## Molecule: Fe-LYS-02

|    |             |             |             |
|----|-------------|-------------|-------------|
| N  | 2.22390100  | -2.31229400 | -0.81760000 |
| H  | 2.22546600  | -2.93784600 | -0.00612000 |
| H  | 3.19439600  | -2.06156200 | -1.02289300 |
| H  | 1.84351000  | -2.82388000 | -1.61798700 |
| C  | 1.38787500  | -1.10450700 | -0.54525700 |
| H  | 1.46107000  | -0.45439900 | -1.41655700 |
| C  | -0.06062100 | -1.54847900 | -0.31631100 |
| C  | 1.98027400  | -0.39799500 | 0.66626100  |
| H  | -0.35658300 | -2.12275500 | -1.19755800 |
| H  | -0.08538500 | -2.22424600 | 0.54230800  |
| C  | -1.03380800 | -0.39623000 | -0.10871700 |
| O  | 2.55768400  | -0.99254600 | 1.54679200  |
| H  | -0.78161100 | 0.14439000  | 0.80708000  |
| H  | -0.93924300 | 0.31551400  | -0.93731900 |
| C  | -2.48061400 | -0.86792100 | -0.02082400 |
| H  | -2.74850200 | -1.42404300 | -0.92323200 |
| H  | -2.59670300 | -1.54483300 | 0.83008000  |
| C  | -3.41477400 | 0.31318900  | 0.14045100  |
| H  | -3.19198700 | 0.88417500  | 1.03933100  |
| H  | -3.37381900 | 0.97936400  | -0.71871800 |
| N  | -4.83613600 | -0.14245000 | 0.26304500  |
| H  | -4.95482400 | -0.74380200 | 1.08142400  |
| H  | -5.46763900 | 0.65469100  | 0.36096100  |
| H  | -5.12094900 | -0.67507400 | -0.56170100 |
| O  | 1.81740000  | 0.91897300  | 0.71369500  |
| Fe | 0.99645400  | 2.14683700  | -0.35979700 |

## Molecule: Hg-LYS-01

|    |             |             |             |
|----|-------------|-------------|-------------|
| N  | -0.68546000 | 3.34507100  | -0.12794500 |
| H  | -0.45672000 | 3.26719500  | -1.12266500 |
| H  | 0.12875600  | 3.73755500  | 0.35055700  |
| H  | -1.46742900 | 3.99628800  | -0.02319300 |
| C  | -1.05325000 | 2.00644900  | 0.43475900  |
| H  | -1.24902100 | 2.15298300  | 1.49420600  |
| C  | -2.30256000 | 1.48909400  | -0.27961100 |
| C  | 0.13398500  | 1.06679500  | 0.28085900  |
| H  | -3.04683400 | 2.28852000  | -0.23707400 |
| H  | -2.06504500 | 1.31948500  | -1.33282400 |
| C  | -2.88204300 | 0.22739500  | 0.34780100  |
| O  | 0.96981600  | 1.29980900  | -0.63489500 |
| H  | -2.17029100 | -0.59566800 | 0.26292200  |
| H  | -3.04780600 | 0.39730900  | 1.41512000  |
| C  | -4.19741500 | -0.17124700 | -0.31550300 |
| H  | -4.91572900 | 0.65011100  | -0.24051400 |
| H  | -4.03313500 | -0.36528500 | -1.37946700 |
| C  | -4.78002100 | -1.40709800 | 0.33609700  |
| H  | -4.11409600 | -2.26287500 | 0.24962600  |
| H  | -5.00704000 | -1.24086800 | 1.38689500  |
| N  | -6.06797600 | -1.79655300 | -0.32536000 |
| H  | -5.92203000 | -1.99523400 | -1.31768600 |
| H  | -6.46979100 | -2.62939000 | 0.10945900  |
| H  | -6.75451200 | -1.04189700 | -0.25696700 |
| O  | 0.21719400  | 0.08945800  | 1.06250000  |
| Hg | 2.23570600  | -0.61125400 | -0.05540600 |

## Molecule: Hg-LYS-02

|    |             |             |             |
|----|-------------|-------------|-------------|
| N  | -0.82317600 | 3.37923400  | -1.02720600 |
| H  | -0.67176700 | 4.05241200  | -0.26961100 |
| H  | -1.81456200 | 3.40607800  | -1.27512500 |
| H  | -0.27504500 | 3.66459400  | -1.84175000 |
| C  | -0.41658300 | 2.01448800  | -0.56840200 |
| H  | -0.76347400 | 1.30517800  | -1.31719800 |
| C  | 1.10660900  | 1.97627000  | -0.44574700 |
| C  | -1.12101600 | 1.75868300  | 0.76676000  |
| H  | 1.51519700  | 2.29696400  | -1.40708600 |
| H  | 1.41594400  | 2.71008200  | 0.30331600  |
| C  | 1.66189200  | 0.60381700  | -0.09313700 |
| O  | -1.34599900 | 2.71425800  | 1.50834200  |
| H  | 1.30817600  | 0.29903100  | 0.89397500  |
| H  | 1.28091300  | -0.13479900 | -0.80976900 |
| C  | 3.18624400  | 0.58184000  | -0.10419700 |
| H  | 3.55882900  | 0.89245600  | -1.08422600 |
| H  | 3.57041200  | 1.29298200  | 0.63285900  |
| C  | 3.70623400  | -0.80346600 | 0.21543600  |
| H  | 3.36147900  | -1.15082600 | 1.18702100  |
| H  | 3.41574400  | -1.52845200 | -0.54149900 |
| N  | 5.20379000  | -0.80907400 | 0.26563700  |
| H  | 5.54448600  | -0.18059100 | 0.99632500  |
| H  | 5.56126100  | -1.74584100 | 0.46066700  |
| H  | 5.59997000  | -0.49686600 | -0.62380800 |
| O  | -1.44425300 | 0.55114600  | 1.09975100  |
| Hg | -1.12112700 | -1.19483200 | -0.11827700 |

## Molecule: Mn-LYS-11

|    |             |             |             |
|----|-------------|-------------|-------------|
| N  | 1.11770300  | 2.87582800  | -0.11928300 |
| H  | 1.34882800  | 2.72568800  | -1.10494800 |
| H  | 1.98326900  | 3.10896800  | 0.37208900  |
| H  | 0.47903000  | 3.67094300  | -0.04733700 |
| C  | 0.48706600  | 1.64259900  | 0.45298300  |
| H  | 0.36622200  | 1.81395200  | 1.51988800  |
| C  | -0.86905400 | 1.42602300  | -0.21881300 |
| C  | 1.43502500  | 0.47455100  | 0.23115700  |
| H  | -1.44168000 | 2.34966300  | -0.10163000 |
| H  | -0.71113500 | 1.27192600  | -1.28978600 |
| C  | -1.66134100 | 0.26351300  | 0.36810400  |
| O  | 2.21021400  | 0.49851100  | -0.76364900 |
| H  | -1.11390200 | -0.67101800 | 0.23294200  |
| H  | -1.77886100 | 0.41050500  | 1.44513100  |
| C  | -3.03489700 | 0.14089000  | -0.28371100 |
| H  | -3.59750800 | 1.06853700  | -0.14528400 |
| H  | -2.92224100 | -0.01472600 | -1.36051600 |
| C  | -3.81553600 | -1.01218200 | 0.31135300  |
| H  | -3.31619900 | -1.96527800 | 0.15062800  |
| H  | -3.98248900 | -0.87771700 | 1.37796200  |
| N  | -5.16811100 | -1.12172500 | -0.32440700 |
| H  | -5.08295100 | -1.28520600 | -1.32992500 |
| H  | -5.70197800 | -1.89281700 | 0.08011400  |
| H  | -5.70117000 | -0.25990900 | -0.18996500 |
| O  | 1.39442600  | -0.49495600 | 1.03441300  |
| Mn | 3.01763700  | -1.57492100 | -0.15344300 |

## Molecule: Mn-LYS-21

|    |             |             |             |
|----|-------------|-------------|-------------|
| N  | 2.25913000  | -2.17004800 | -0.95457100 |
| H  | 2.33839300  | -2.78442400 | -0.13765600 |
| H  | 3.20400700  | -1.88218100 | -1.21648700 |
| H  | 1.84608700  | -2.68582900 | -1.73417700 |
| C  | 1.42013900  | -0.99063400 | -0.57258900 |
| H  | 1.56916800  | -0.22800100 | -1.33521300 |
| C  | -0.04227700 | -1.43146200 | -0.51253600 |
| C  | 1.92571100  | -0.48991700 | 0.78925800  |
| H  | -0.30438300 | -1.84816500 | -1.48879700 |
| H  | -0.12975800 | -2.23821800 | 0.22061400  |
| C  | -1.01561700 | -0.31217400 | -0.16238600 |
| O  | 2.40526500  | -1.33051500 | 1.56773700  |
| H  | -0.77663100 | 0.09598300  | 0.82140500  |
| H  | -0.90955900 | 0.50856700  | -0.88111100 |
| C  | -2.45784700 | -0.80603800 | -0.15716500 |
| H  | -2.72065800 | -1.21225400 | -1.13769600 |
| H  | -2.56172400 | -1.61645100 | 0.57030100  |
| C  | -3.41552400 | 0.31060500  | 0.20129500  |
| H  | -3.17955000 | 0.74711800  | 1.16939500  |
| H  | -3.42225000 | 1.09782100  | -0.54950600 |
| N  | -4.81821500 | -0.20962600 | 0.29584700  |
| H  | -4.88428400 | -0.93786300 | 1.01020000  |
| H  | -5.47305100 | 0.53525700  | 0.54052800  |
| H  | -5.11665600 | -0.61861400 | -0.59257000 |
| O  | 1.78759200  | 0.74763600  | 1.04101300  |
| Mn | 1.05616300  | 2.26822900  | -0.36133700 |

## Molecule: Ni-LYS-01

|    |             |             |             |
|----|-------------|-------------|-------------|
| N  | 1.13208800  | 2.84739800  | -0.09741600 |
| H  | 1.31076400  | 2.74645000  | -1.10066200 |
| H  | 2.02449100  | 3.03743800  | 0.36543700  |
| H  | 0.51936400  | 3.65524000  | 0.04091600  |
| C  | 0.48238200  | 1.61724800  | 0.45460200  |
| H  | 0.36193800  | 1.76830400  | 1.52520000  |
| C  | -0.87744100 | 1.41636000  | -0.22088200 |
| C  | 1.40381200  | 0.44814200  | 0.23088800  |
| H  | -1.42717000 | 2.35297200  | -0.10223100 |
| H  | -0.71935500 | 1.25877100  | -1.29073700 |
| C  | -1.69260100 | 0.27270800  | 0.37098100  |
| O  | 2.24164600  | 0.44275500  | -0.72289600 |
| H  | -1.16769800 | -0.67485900 | 0.23800500  |
| H  | -1.80769600 | 0.42699400  | 1.44701700  |
| C  | -3.06716500 | 0.18256800  | -0.28412500 |
| H  | -3.60459300 | 1.12597600  | -0.15250300 |
| H  | -2.95532900 | 0.01757800  | -1.35952900 |
| C  | -3.88018300 | -0.94488400 | 0.31609300  |
| H  | -3.40740900 | -1.91252500 | 0.16193400  |
| H  | -4.04596800 | -0.79922200 | 1.38137500  |
| N  | -5.23303500 | -1.02001100 | -0.32343900 |
| H  | -5.14958100 | -1.20099100 | -1.32616100 |
| H  | -5.79387600 | -1.76718400 | 0.08940700  |
| H  | -5.73861200 | -0.13934600 | -0.20505600 |
| O  | 1.33873700  | -0.57571700 | 0.97611700  |
| Ni | 2.76612400  | -1.41344500 | -0.14276900 |

## Molecule: Ni-LYS-022

|    |             |             |             |
|----|-------------|-------------|-------------|
| N  | 2.10325900  | -2.39867700 | -0.84803900 |
| H  | 2.13738400  | -3.00607100 | -0.02413100 |
| H  | 3.06526400  | -2.16027600 | -1.10064000 |
| H  | 1.68318900  | -2.91846900 | -1.62235800 |
| C  | 1.29783200  | -1.17526000 | -0.54877100 |
| H  | 1.37731100  | -0.52064200 | -1.41511300 |
| C  | -0.15711400 | -1.59024900 | -0.32014200 |
| C  | 1.91943100  | -0.50624800 | 0.67431500  |
| H  | -0.47554800 | -2.14199200 | -1.20825100 |
| H  | -0.19650300 | -2.27779400 | 0.52867500  |
| C  | -1.09357500 | -0.41199700 | -0.09108500 |
| O  | 2.44619400  | -1.18439200 | 1.54144000  |
| H  | -0.83256300 | 0.09600000  | 0.84027400  |
| H  | -0.95966600 | 0.31504200  | -0.90154100 |
| C  | -2.55759200 | -0.83310100 | -0.03859000 |
| H  | -2.83729000 | -1.32899900 | -0.97213600 |
| H  | -2.71018400 | -1.54987900 | 0.77301400  |
| C  | -3.44723200 | 0.37353200  | 0.17757900  |
| H  | -3.22815600 | 0.87229400  | 1.11917300  |
| H  | -3.35159200 | 1.09343900  | -0.63250900 |
| N  | -4.89069000 | -0.02618200 | 0.22778900  |
| H  | -5.06045700 | -0.68139300 | 0.99419600  |
| H  | -5.49065000 | 0.78891900  | 0.36765800  |
| H  | -5.17159800 | -0.48344400 | -0.64238600 |
| O  | 1.85172100  | 0.79639800  | 0.76002400  |
| Ni | 1.12175900  | 2.10147000  | -0.33191900 |

## Molecule: Zn-LYS-01

|    |             |             |             |
|----|-------------|-------------|-------------|
| N  | 0.87771900  | 2.88188600  | -0.05905000 |
| H  | 1.12457000  | 2.79052500  | -1.04813100 |
| H  | 1.72658900  | 3.13521200  | 0.45134900  |
| H  | 0.20080500  | 3.64170200  | 0.03969200  |
| C  | 0.29635600  | 1.60033900  | 0.45471200  |
| H  | 0.12171600  | 1.73644600  | 1.51963900  |
| C  | -1.01920500 | 1.32468500  | -0.27664600 |
| C  | 1.31219900  | 0.49342200  | 0.25195900  |
| H  | -1.59917300 | 2.25051400  | -0.25071600 |
| H  | -0.80528800 | 1.10449300  | -1.32579100 |
| C  | -1.84333800 | 0.20548400  | 0.34924800  |
| O  | 2.21276900  | 0.64081800  | -0.62498000 |
| H  | -1.31023100 | -0.74372200 | 0.27674800  |
| H  | -1.98313900 | 0.41386400  | 1.41355100  |
| C  | -3.20500000 | 0.07806800  | -0.32623900 |
| H  | -3.73601000 | 1.03277900  | -0.27107700 |
| H  | -3.07567100 | -0.16210300 | -1.38545900 |
| C  | -4.04272100 | -0.99542400 | 0.33586100  |
| H  | -3.58410900 | -1.97836000 | 0.25362200  |
| H  | -4.22008200 | -0.77606400 | 1.38662900  |
| N  | -5.38859500 | -1.09076600 | -0.31586200 |
| H  | -5.29635500 | -1.32989700 | -1.30563600 |
| H  | -5.96526200 | -1.80542400 | 0.13145600  |
| H  | -5.88217600 | -0.19744200 | -0.25401300 |
| O  | 1.22075400  | -0.55820800 | 0.93664400  |
| Zn | 2.98006700  | -1.28502300 | -0.14113900 |

## Molecule: Zn-LYS-022

|    |             |             |             |
|----|-------------|-------------|-------------|
| N  | -1.80996500 | 2.50884600  | -0.86811700 |
| H  | -1.70230500 | 3.14274400  | -0.07041700 |
| H  | -2.80988800 | 2.37267100  | -1.03122200 |
| H  | -1.40262400 | 2.94525800  | -1.69881500 |
| C  | -1.12888100 | 1.21417900  | -0.55844100 |
| H  | -1.45126400 | 0.49612800  | -1.30993700 |
| C  | 0.38258400  | 1.42763600  | -0.61921900 |
| C  | -1.58163500 | 0.75903900  | 0.83492700  |
| H  | 0.64160000  | 1.66378500  | -1.65433100 |
| H  | 0.63162800  | 2.30130500  | -0.01099300 |
| C  | 1.19966200  | 0.23448800  | -0.13666300 |
| O  | -1.78829300 | 1.61884100  | 1.69401300  |
| H  | 0.99662100  | 0.05342600  | 0.92108600  |
| H  | 0.90432600  | -0.67036800 | -0.67653200 |
| C  | 2.69344300  | 0.48524200  | -0.32157500 |
| H  | 2.93726800  | 0.52338100  | -1.38672400 |
| H  | 2.95503400  | 1.45717300  | 0.10731900  |
| C  | 3.52355100  | -0.58650200 | 0.35218400  |
| H  | 3.33638000  | -0.62310800 | 1.42327400  |
| H  | 3.34524600  | -1.57253700 | -0.07121200 |
| N  | 4.98511200  | -0.29950700 | 0.18270300  |
| H  | 5.22011900  | 0.61018300  | 0.58588800  |
| H  | 5.55649400  | -1.00968400 | 0.64378400  |
| H  | 5.24026100  | -0.27927100 | -0.80721700 |
| O  | -1.67573800 | -0.50576700 | 1.04824000  |
| Zn | -1.64816800 | -1.89951800 | -0.31371200 |

## Molecule: Cd-CYS-01

|    |             |             |             |
|----|-------------|-------------|-------------|
| N  | -1.97086000 | 2.33129000  | -0.02644900 |
| H  | -1.50888800 | 2.44233000  | -0.93320400 |
| H  | -1.49619000 | 2.93874900  | 0.64585900  |
| H  | -2.94270200 | 2.63990700  | -0.11040700 |
| C  | -1.91212900 | 0.90179900  | 0.41515100  |
| H  | -2.33061500 | 0.85842400  | 1.41657800  |
| C  | -2.74234600 | 0.07688300  | -0.56444200 |
| C  | -0.45730300 | 0.43648200  | 0.44884900  |
| H  | -3.76287100 | 0.45421000  | -0.55403500 |
| H  | -2.33187300 | 0.17811800  | -1.56855400 |
| O  | 0.32693400  | 0.96970200  | -0.40333800 |
| O  | -0.13830600 | -0.45262500 | 1.25120600  |
| Cd | 2.19760500  | -0.19604200 | -0.10708300 |
| S  | -2.77138300 | -1.69028800 | -0.07998700 |
| H  | -3.81209300 | -2.00375900 | -0.87163400 |

## Molecule: Cd-CYS-02

|    |             |             |             |
|----|-------------|-------------|-------------|
| N  | 3.18438100  | 0.39877800  | 0.62154300  |
| H  | 3.69152100  | 0.33110600  | -0.26490600 |
| H  | 3.52287700  | -0.35651100 | 1.22137400  |
| H  | 3.40115800  | 1.29602400  | 1.06169400  |
| C  | 1.71276000  | 0.26098300  | 0.39469200  |
| H  | 1.24879900  | 0.34041000  | 1.37660100  |
| C  | 1.26441600  | 1.39610100  | -0.53845100 |
| C  | 1.44687100  | -1.14330800 | -0.18216100 |
| H  | 1.93599900  | 2.24626800  | -0.43483100 |
| H  | 1.25570200  | 1.07849500  | -1.57715200 |
| O  | 2.42023600  | -1.81701900 | -0.53149800 |
| O  | 0.23331900  | -1.52675200 | -0.26332900 |
| Cd | -1.62047100 | -0.39011700 | 0.11724700  |
| S  | -0.40621600 | 2.02579800  | -0.10534300 |
| H  | -0.83740400 | 2.25310400  | -1.36180400 |

## Molecule: Cd-CYS-03

|    |             |             |             |
|----|-------------|-------------|-------------|
| N  | -2.13796000 | 1.72901900  | 0.04686700  |
| H  | -1.96202600 | 1.87436800  | -0.95130500 |
| H  | -1.64079000 | 2.46127000  | 0.55873900  |
| H  | -3.14127300 | 1.83363900  | 0.22171800  |
| C  | -1.67400600 | 0.37641100  | 0.47531700  |
| H  | -1.88226500 | 0.29471400  | 1.54082400  |
| C  | -2.40425000 | -0.71733400 | -0.29764200 |
| C  | -0.16604100 | 0.27471000  | 0.27119100  |
| H  | -2.17044600 | -0.66044000 | -1.35977000 |
| H  | -2.05682000 | -1.67729100 | 0.07461700  |
| O  | 0.45829100  | 1.24938300  | -0.20636000 |
| O  | 0.37922400  | -0.81850200 | 0.59422600  |
| Cd | 2.47009700  | -0.17019100 | -0.08174600 |
| S  | -4.21718900 | -0.70350700 | -0.07542000 |
| H  | -4.50463900 | 0.14611200  | -1.07849800 |

## Molecule: Cu-CYS-01

|    |             |             |             |
|----|-------------|-------------|-------------|
| N  | -1.45852300 | 2.34445000  | 0.10509100  |
| H  | -1.23266100 | 2.53025300  | -0.87667900 |
| H  | -0.84485300 | 2.92389700  | 0.68436600  |
| H  | -2.42736200 | 2.62765600  | 0.27441600  |
| C  | -1.28729300 | 0.89477600  | 0.42639800  |
| H  | -1.52672400 | 0.76671400  | 1.47977400  |
| C  | -2.24218600 | 0.08778200  | -0.45273300 |
| C  | 0.15877400  | 0.51883900  | 0.19916900  |
| H  | -3.25060900 | 0.45687000  | -0.28040800 |
| H  | -1.98468200 | 0.22915700  | -1.50170600 |
| O  | 0.92477200  | 1.21601300  | -0.50321100 |
| O  | 0.59499100  | -0.55937800 | 0.72345800  |
| Cu | 2.35435200  | -0.38420000 | -0.08315600 |
| S  | -2.20511700 | -1.69538700 | -0.02721200 |
| H  | -3.45165000 | -1.93916400 | -0.46748000 |

## Molecule: Cu-CYS-02

|    |             |             |             |
|----|-------------|-------------|-------------|
| N  | -2.88252200 | 0.72528700  | 0.03599800  |
| H  | -3.03295200 | 0.71205100  | 1.04937400  |
| H  | -3.45785200 | -0.02022600 | -0.36726000 |
| H  | -3.18932700 | 1.63109300  | -0.32695400 |
| C  | -1.44916400 | 0.47441400  | -0.29669200 |
| H  | -1.35082400 | 0.66373200  | -1.36786500 |
| C  | -0.58932600 | 1.44010800  | 0.50869500  |
| C  | -1.18130300 | -1.02496100 | -0.07317800 |
| H  | -1.03314600 | 2.43414100  | 0.49753900  |
| H  | -0.46345000 | 1.10664900  | 1.53560300  |
| O  | -2.14169100 | -1.78359400 | -0.00438500 |
| O  | 0.03656500  | -1.43390600 | -0.01322900 |
| Cu | 1.73507900  | -0.65611600 | 0.05923000  |
| S  | 1.05349500  | 1.60561100  | -0.27931000 |
| H  | 1.69175000  | 2.13576700  | 0.78682800  |

## Molecule: Cu-CYS-33

|    |             |             |             |
|----|-------------|-------------|-------------|
| N  | -1.42893900 | 1.72636600  | 0.09550100  |
| H  | -1.27544400 | 1.89345900  | -0.90372500 |
| H  | -0.87444100 | 2.41064300  | 0.61681200  |
| H  | -2.41785600 | 1.89100200  | 0.30390600  |
| C  | -1.05057200 | 0.33261000  | 0.47035900  |
| H  | -1.23796800 | 0.22580200  | 1.53822900  |
| C  | -1.85677800 | -0.69476900 | -0.32219800 |
| C  | 0.42971000  | 0.14892000  | 0.23244700  |
| H  | -1.63990500 | -0.61531800 | -1.38634600 |
| H  | -1.55301100 | -1.68343900 | 0.01282900  |
| O  | 1.13585400  | 1.07433900  | -0.25305700 |
| O  | 0.98360300  | -0.95564400 | 0.51866700  |
| S  | -3.65793400 | -0.59027800 | -0.05332500 |
| H  | -3.91720800 | 0.33010700  | -1.00037600 |
| Cu | 2.73639700  | -0.23318900 | -0.11741900 |

## Molecule: Fe-CYS-01

|    |             |             |             |
|----|-------------|-------------|-------------|
| N  | 1.28432400  | 2.36518400  | -0.08943500 |
| H  | 1.08985100  | 2.55606600  | 0.89851400  |
| H  | 0.62550100  | 2.90883900  | -0.65475400 |
| H  | 2.23293300  | 2.69071400  | -0.29760800 |
| C  | 1.18173400  | 0.90565300  | -0.39090900 |
| H  | 1.42452300  | 0.77974800  | -1.44537400 |
| C  | 2.18547600  | 0.14425700  | 0.48584900  |
| C  | -0.23665700 | 0.45688500  | -0.18791300 |
| H  | 3.15472300  | 0.62738700  | 0.37814800  |
| H  | 1.88832600  | 0.20439000  | 1.53260000  |
| O  | -1.12311100 | 1.17189400  | 0.35541300  |
| O  | -0.59914900 | -0.70280400 | -0.57864000 |
| Fe | -2.49032500 | -0.44990200 | 0.07956500  |
| S  | 2.34326900  | -1.62201100 | 0.10171400  |
| H  | 2.84477900  | -1.46730400 | -1.13792000 |

## Molecule: Fe-CYS-02

|    |             |             |             |
|----|-------------|-------------|-------------|
| N  | -2.96703800 | -0.04574600 | 0.23315100  |
| H  | -2.94359100 | -0.28894600 | 1.22878400  |
| H  | -3.40043500 | -0.82819900 | -0.26526400 |
| H  | -3.55254500 | 0.78549100  | 0.11412200  |
| C  | -1.59415200 | 0.21021700  | -0.28969000 |
| H  | -1.70409800 | 0.49900800  | -1.33662300 |
| C  | -0.96185800 | 1.33477400  | 0.52478200  |
| C  | -0.81565200 | -1.09950800 | -0.24669100 |
| H  | -1.66810300 | 2.15915600  | 0.61613200  |
| H  | -0.68362900 | 0.98969400  | 1.51919600  |
| O  | -1.33275300 | -2.15087200 | 0.04123700  |
| O  | 0.45002100  | -0.98446400 | -0.61696500 |
| Fe | 2.03153900  | -0.58187300 | 0.21742600  |
| S  | 0.51626600  | 1.98678800  | -0.32449000 |
| H  | 0.93322300  | 2.75391800  | 0.70577700  |

## Molecule: Fe-CYS-33

|    |             |             |             |
|----|-------------|-------------|-------------|
| N  | -1.32251100 | 1.70073400  | 0.07399700  |
| H  | -1.19368300 | 1.83525800  | -0.93442100 |
| H  | -0.73933400 | 2.38697400  | 0.56176700  |
| H  | -2.30172300 | 1.89607700  | 0.30308700  |
| C  | -0.97758000 | 0.30735200  | 0.48022700  |
| H  | -1.16314200 | 0.22649100  | 1.55190100  |
| C  | -1.80374600 | -0.72715700 | -0.28796600 |
| C  | 0.49321200  | 0.09485600  | 0.25772100  |
| H  | -1.55903500 | -0.70136100 | -1.34824800 |
| H  | -1.54689400 | -1.70972700 | 0.10020500  |
| O  | 1.23553600  | 1.02448800  | -0.18458300 |
| O  | 1.06490300  | -1.01044900 | 0.50087700  |
| S  | -3.60300000 | -0.53330400 | -0.06853500 |
| H  | -3.79423200 | 0.35194300  | -1.06449900 |
| Fe | 2.86649200  | -0.22386800 | -0.14697900 |

## Molecule: Hg-CYS-01

|    |             |             |             |
|----|-------------|-------------|-------------|
| N  | -3.25705500 | -1.98327700 | -0.17054800 |
| H  | -3.17154200 | -2.25040500 | 0.81422400  |
| H  | -2.84545300 | -2.73353700 | -0.73046600 |
| H  | -4.24961500 | -1.90738200 | -0.40668400 |
| C  | -2.55876200 | -0.68636300 | -0.42452400 |
| H  | -2.66773800 | -0.46504900 | -1.48307600 |
| C  | -3.21853400 | 0.39227600  | 0.43133800  |
| C  | -1.07693700 | -0.86865300 | -0.08283400 |
| H  | -4.28789500 | 0.37936800  | 0.23350600  |
| H  | -3.05164500 | 0.18002800  | 1.48695800  |
| O  | -0.70215700 | -1.81633000 | 0.59687000  |
| O  | -0.35483300 | 0.08686000  | -0.55970200 |
| Hg | 1.72351600  | 0.07193600  | 0.01055100  |
| S  | -2.59360300 | 2.06487600  | 0.01492400  |
| H  | -3.72901000 | 2.69923500  | 0.35529400  |

## Molecule: Hg-CYS-02

|    |             |             |             |
|----|-------------|-------------|-------------|
| N  | 3.48559700  | 0.36867000  | 0.66749300  |
| H  | 4.02068500  | 0.27927600  | -0.20078700 |
| H  | 3.78966400  | -0.38391200 | 1.28964500  |
| H  | 3.70390500  | 1.26791500  | 1.10333400  |
| C  | 2.02073100  | 0.25341300  | 0.39497100  |
| H  | 1.52691200  | 0.32854600  | 1.36236000  |
| C  | 1.61292500  | 1.40119400  | -0.54410900 |
| C  | 1.75874100  | -1.14256400 | -0.20271000 |
| H  | 2.29883200  | 2.23836700  | -0.42806200 |
| H  | 1.60999500  | 1.08713200  | -1.58378200 |
| O  | 2.72882200  | -1.82065200 | -0.54225800 |
| O  | 0.54367600  | -1.53145300 | -0.31507300 |
| Hg | -1.23306100 | -0.24078600 | 0.08041000  |
| S  | -0.04874400 | 2.08192500  | -0.14183600 |
| H  | -0.45877700 | 2.29861800  | -1.40887000 |

## Molecule: Hg-CYS-03

|    |             |             |             |
|----|-------------|-------------|-------------|
| N  | -2.97846900 | 1.73287600  | 0.16509000  |
| H  | -2.87051100 | 1.97708300  | -0.82366600 |
| H  | -2.58029200 | 2.49648900  | 0.71636500  |
| H  | -3.97631200 | 1.66604400  | 0.38317800  |
| C  | -2.28792300 | 0.44569900  | 0.46840600  |
| H  | -2.40821300 | 0.25893900  | 1.53261300  |
| C  | -2.87790100 | -0.69821100 | -0.35369800 |
| C  | -0.80100200 | 0.61068800  | 0.14019700  |
| H  | -2.72213900 | -0.52769500 | -1.41772600 |
| H  | -2.35526100 | -1.61037600 | -0.07607700 |
| O  | -0.41703900 | 1.55728600  | -0.53908100 |
| O  | -0.07621900 | -0.33822900 | 0.62077000  |
| Hg | 1.96297000  | -0.15000200 | -0.02601200 |
| S  | -4.64935100 | -1.01054700 | -0.04038900 |
| H  | -5.13896700 | -0.12321900 | -0.92605400 |

## Molecule: Mn-CYS-011

|    |             |             |             |
|----|-------------|-------------|-------------|
| N  | -1.32929800 | 2.34548000  | 0.09016100  |
| H  | -0.97097600 | 2.51231300  | -0.85399500 |
| H  | -0.75538900 | 2.88894100  | 0.73887700  |
| H  | -2.29300600 | 2.68376600  | 0.14521300  |
| C  | -1.25876600 | 0.88708900  | 0.42088800  |
| H  | -1.55790300 | 0.78238900  | 1.46060100  |
| C  | -2.22334600 | 0.14397700  | -0.49791600 |
| C  | 0.18183100  | 0.41322800  | 0.25706000  |
| H  | -3.21251700 | 0.58380600  | -0.39031000 |
| H  | -1.89942500 | 0.24513500  | -1.53333700 |
| O  | 0.96668300  | 1.10763900  | -0.44417600 |
| O  | 0.50405200  | -0.66173100 | 0.81609100  |
| S  | -2.34173900 | -1.62879700 | -0.04515000 |
| H  | -3.57794200 | -1.79064800 | -0.54813400 |
| Mn | 2.76303500  | -0.41985300 | -0.11932600 |

## Molecule: Mn-CYS-24

|    |             |             |             |
|----|-------------|-------------|-------------|
| N  | -2.86368000 | 0.57852500  | -0.27589000 |
| H  | -3.18931600 | 0.60079100  | 0.69436800  |
| H  | -3.33602300 | -0.20618300 | -0.73227900 |
| H  | -3.12790900 | 1.45474500  | -0.73075500 |
| C  | -1.38499500 | 0.36428300  | -0.33470600 |
| H  | -1.10893000 | 0.48320200  | -1.38323200 |
| C  | -0.69616400 | 1.41003800  | 0.54348500  |
| C  | -1.10310900 | -1.09401400 | 0.06893000  |
| H  | -1.26655300 | 2.33665900  | 0.53057800  |
| H  | -0.60798700 | 1.06029000  | 1.56861400  |
| O  | -2.06303300 | -1.86201000 | 0.18298500  |
| O  | 0.11433300  | -1.41124200 | 0.24866100  |
| S  | 0.97668300  | 1.80806500  | -0.09878900 |
| H  | 1.50069100  | 2.21681500  | 1.07219900  |
| Mn | 2.01000300  | -0.75283500 | -0.10508300 |

## Molecule: Mn-CYS-31

|    |             |             |             |
|----|-------------|-------------|-------------|
| N  | 1.76271800  | -1.75583700 | -0.60905700 |
| H  | 1.61580900  | -1.23744200 | -1.47868900 |
| C  | 1.26310200  | -0.97868100 | 0.56770700  |
| H  | 1.30482300  | -1.64987700 | 1.42450700  |
| C  | -0.18703300 | -0.57857900 | 0.32010800  |
| O  | -0.80975200 | -0.04302000 | 1.27297000  |
| C  | 2.15888100  | 0.22113100  | 0.84733900  |
| H  | 1.83008900  | 0.67335800  | 1.78008600  |
| H  | 3.18951900  | -0.10363700 | 0.97807300  |
| H  | 2.75843700  | -1.96914500 | -0.51044700 |
| H  | 1.24887300  | -2.63510700 | -0.69725700 |
| O  | -0.68213700 | -0.78612300 | -0.81765300 |
| S  | 2.08676000  | 1.55805900  | -0.39531200 |
| H  | 2.81049300  | 0.94734500  | -1.35210200 |
| Mn | -2.71839200 | 0.31945300  | -0.14437000 |

## Molecule: Ni-CYS-01

|    |             |             |             |
|----|-------------|-------------|-------------|
| N  | -1.21018300 | 2.38443700  | 0.10114900  |
| H  | -0.99153800 | 2.55308000  | -0.88556700 |
| H  | -0.52994800 | 2.89831300  | 0.66840500  |
| H  | -2.14231000 | 2.76090200  | 0.29397800  |
| C  | -1.18033200 | 0.92367300  | 0.41731100  |
| H  | -1.44528400 | 0.81333000  | 1.46696500  |
| C  | -2.19315800 | 0.20774900  | -0.47704300 |
| C  | 0.22186100  | 0.40980400  | 0.22367900  |
| H  | -3.15802100 | 0.68899300  | -0.33461100 |
| H  | -1.89536500 | 0.30572700  | -1.52012000 |
| O  | 1.09623500  | 1.07943700  | -0.40625600 |
| O  | 0.55068300  | -0.72850400 | 0.67535500  |
| Ni | 2.35593200  | -0.43402300 | -0.09645900 |
| S  | -2.37090000 | -1.56096700 | -0.02778600 |
| H  | -3.66349900 | -1.63810600 | -0.38813500 |

## Molecule: Ni-CYS-02

|    |             |             |             |
|----|-------------|-------------|-------------|
| N  | -2.80068700 | 0.84667700  | -0.12513500 |
| H  | -3.05286800 | 0.84806500  | 0.86809000  |
| H  | -3.39271200 | 0.15110000  | -0.58776200 |
| H  | -2.99443000 | 1.77321200  | -0.51274400 |
| C  | -1.36522200 | 0.48732300  | -0.31278500 |
| H  | -1.15540800 | 0.62867100  | -1.37478900 |
| C  | -0.51140900 | 1.41830100  | 0.54604800  |
| C  | -1.20773800 | -1.01303100 | -0.00804000 |
| H  | -0.93108400 | 2.42237400  | 0.54883600  |
| H  | -0.42236800 | 1.05747400  | 1.56770500  |
| O  | -2.21381200 | -1.69645100 | 0.12501700  |
| O  | -0.01200600 | -1.49057500 | 0.05774700  |
| Ni | 1.69501300  | -0.70771200 | -0.01468300 |
| S  | 1.16295900  | 1.57207600  | -0.18536000 |
| H  | 1.79871000  | 1.99571800  | 0.93004100  |

## Molecule: Ni-CYS-03

|    |             |             |             |
|----|-------------|-------------|-------------|
| N  | -1.36299900 | 1.72358700  | 0.10487500  |
| H  | -1.22877200 | 1.89723800  | -0.89630100 |
| H  | -0.78796300 | 2.39498300  | 0.62128800  |
| H  | -2.34473600 | 1.90226100  | 0.33526600  |
| C  | -1.00452600 | 0.32077600  | 0.46123100  |
| H  | -1.18539700 | 0.20385300  | 1.52956400  |
| C  | -1.83052100 | -0.68778800 | -0.33717800 |
| C  | 0.46870200  | 0.11459900  | 0.22087400  |
| H  | -1.62358400 | -0.59601900 | -1.40221000 |
| H  | -1.53387800 | -1.68397000 | -0.01805600 |
| O  | 1.19951900  | 1.03682100  | -0.25397200 |
| O  | 1.01302700  | -0.99787800 | 0.49597300  |
| Ni | 2.73740400  | -0.22570600 | -0.11503700 |
| S  | -3.62619200 | -0.56463200 | -0.04462500 |
| H  | -3.88522500 | 0.37337800  | -0.97421800 |

## Molecule: Zn-CYS-02

|    |             |             |             |
|----|-------------|-------------|-------------|
| N  | -2.84084800 | 0.77344000  | -0.28649400 |
| H  | -3.17410500 | 0.77327900  | 0.68167800  |
| H  | -3.38324600 | 0.06804200  | -0.79086400 |
| H  | -3.01604800 | 1.69432200  | -0.69488900 |
| C  | -1.38721700 | 0.43390700  | -0.34792000 |
| H  | -1.09726600 | 0.53933800  | -1.39399700 |
| C  | -0.63284200 | 1.42406700  | 0.54470900  |
| C  | -1.22765300 | -1.04519000 | 0.05260600  |
| H  | -1.13103100 | 2.39099700  | 0.52635600  |
| H  | -0.57732300 | 1.07018700  | 1.57054800  |
| O  | -2.24483500 | -1.69461900 | 0.28909300  |
| O  | -0.04103400 | -1.52472800 | 0.09765500  |
| Zn | 1.71013800  | -0.68672000 | -0.07869100 |
| S  | 1.06913800  | 1.71848100  | -0.07703400 |
| H  | 1.62783600  | 2.03372700  | 1.10954300  |

## Molecule: Zn-CYS-11

|    |             |             |             |
|----|-------------|-------------|-------------|
| N  | -1.41306000 | 2.36439900  | 0.08505900  |
| H  | -1.19764300 | 2.54527300  | -0.89932100 |
| H  | -0.75747300 | 2.90847500  | 0.65103600  |
| H  | -2.36337200 | 2.69160700  | 0.27621100  |
| C  | -1.29757800 | 0.90536300  | 0.39506500  |
| H  | -1.56268100 | 0.78315300  | 1.44332000  |
| C  | -2.27036200 | 0.14082300  | -0.50063600 |
| C  | 0.14279000  | 0.46942500  | 0.20225300  |
| H  | -3.25100900 | 0.60196100  | -0.40960700 |
| H  | -1.94527500 | 0.20462400  | -1.53835900 |
| O  | 0.98797800  | 1.25269200  | -0.29767100 |
| O  | 0.44332400  | -0.71017000 | 0.54090200  |
| S  | -2.43292200 | -1.61516400 | 0.00308200  |
| H  | -3.73279200 | -1.71028600 | -0.32637700 |
| Zn | 2.42429700  | -0.40556100 | -0.07891900 |

## Molecule: Zn-CYS-33

|    |             |             |             |
|----|-------------|-------------|-------------|
| N  | -1.60871600 | 1.73173300  | 0.11476400  |
| H  | -1.48625200 | 1.93597800  | -0.88119100 |
| H  | -1.07841400 | 2.43141000  | 0.63930700  |
| H  | -2.59928600 | 1.83199200  | 0.35188800  |
| C  | -1.12857200 | 0.35587800  | 0.44020400  |
| H  | -1.28002000 | 0.21347200  | 1.50897000  |
| C  | -1.90127000 | -0.69188900 | -0.35388700 |
| C  | 0.36578400  | 0.27963000  | 0.15470500  |
| H  | -1.73172100 | -0.56959700 | -1.42260800 |
| H  | -1.53235200 | -1.67208100 | -0.06250600 |
| O  | 0.96039700  | 1.25351700  | -0.33955200 |
| O  | 0.94828600  | -0.81279500 | 0.45639000  |
| S  | -3.69613100 | -0.70757500 | -0.01959100 |
| H  | -4.04126000 | 0.26746900  | -0.88071600 |
| Zn | 2.82877700  | -0.28090200 | -0.07079600 |



## Molecule: Cd-SER-01

|    |             |             |             |
|----|-------------|-------------|-------------|
| N  | 2.40354400  | -1.84929000 | 0.01801800  |
| H  | 1.91109300  | -2.03857100 | -0.85953000 |
| H  | 2.01858000  | -2.47105700 | 0.73220500  |
| H  | 3.39379900  | -2.07713200 | -0.10418600 |
| C  | 2.23144700  | -0.41819100 | 0.41055900  |
| H  | 2.69334100  | -0.28763700 | 1.38510100  |
| C  | 2.93453300  | 0.44172700  | -0.63700500 |
| C  | 0.74165300  | -0.08568100 | 0.49643600  |
| H  | 3.98143600  | 0.12785900  | -0.69325600 |
| H  | 2.46652800  | 0.27846900  | -1.61283900 |
| O  | 2.82504300  | 1.79689200  | -0.23291600 |
| O  | 0.00511600  | -0.67490200 | -0.37007300 |
| H  | 3.23707200  | 2.34334000  | -0.91417700 |
| O  | 0.34771000  | 0.72787500  | 1.33635000  |
| Cd | -2.02907100 | 0.05507700  | -0.11554700 |

## Molecule: Cd-SER-02

|    |             |             |             |
|----|-------------|-------------|-------------|
| N  | 3.11200200  | 0.57342700  | 0.52987000  |
| H  | 3.58455300  | 0.51752400  | -0.37615200 |
| H  | 3.49680100  | -0.17018000 | 1.11578000  |
| H  | 3.32269900  | 1.47827900  | 0.95718100  |
| C  | 1.64062300  | 0.39314600  | 0.37171200  |
| H  | 1.19906500  | 0.51683100  | 1.36020700  |
| C  | 1.10752700  | 1.48774800  | -0.55447000 |
| C  | 1.36740200  | -1.03354000 | -0.13201200 |
| H  | 1.65864300  | 2.41287300  | -0.37524300 |
| H  | 1.21997600  | 1.20112200  | -1.60044300 |
| O  | -0.27719100 | 1.71746900  | -0.24492200 |
| O  | 2.33688000  | -1.74720200 | -0.41386400 |
| H  | -0.66502900 | 2.25396800  | -0.95058300 |
| O  | 0.14690300  | -1.39603500 | -0.23098500 |
| Cd | -1.62389100 | -0.12296600 | 0.10764500  |

## Molecule: Cd-SER-03

|    |             |             |             |
|----|-------------|-------------|-------------|
| N  | -2.63859500 | 1.48283800  | -0.01183500 |
| H  | -2.33780600 | 1.68536000  | -0.96889800 |
| H  | -2.34721400 | 2.26251900  | 0.58017700  |
| H  | -3.65941400 | 1.40906700  | 0.00194400  |
| C  | -2.04800500 | 0.19445600  | 0.45924400  |
| H  | -2.29250800 | 0.09966500  | 1.51648200  |
| C  | -2.67242000 | -0.95221500 | -0.32234600 |
| C  | -0.53816700 | 0.22455200  | 0.29436000  |
| H  | -2.41380300 | -0.86346200 | -1.38081400 |
| H  | -2.26947700 | -1.88934300 | 0.06298600  |
| O  | -4.08231000 | -0.87629000 | -0.13705600 |
| O  | 0.01021500  | 1.23807200  | -0.18979200 |
| H  | -4.51130700 | -1.29574100 | -0.89278400 |
| O  | 0.09173100  | -0.81783400 | 0.64227100  |
| Cd | 2.11867000  | -0.10292200 | -0.08223300 |

## Molecule: Cd-SER-04

|    |             |             |             |
|----|-------------|-------------|-------------|
| N  | 1.19948300  | 0.06144000  | 1.98625100  |
| H  | 0.19582900  | -0.13355000 | 1.94055500  |
| H  | 1.32032800  | 0.98072300  | 2.41704500  |
| H  | 1.63383400  | -0.63597600 | 2.59635600  |
| C  | 1.81587500  | 0.02545700  | 0.62536700  |
| H  | 2.87265100  | 0.24421900  | 0.74997400  |
| C  | 1.63652300  | -1.38168700 | 0.06671400  |
| C  | 1.20206300  | 1.11628400  | -0.26357600 |
| H  | 2.16792200  | -2.08484800 | 0.71466700  |
| H  | 0.57258300  | -1.64876500 | 0.07730300  |
| O  | 2.15830800  | -1.39572900 | -1.25056300 |
| O  | -0.06244400 | 1.32775400  | -0.17689400 |
| H  | 2.11876000  | -2.30349500 | -1.57706300 |
| O  | 1.96111600  | 1.75171900  | -0.99539800 |
| Cd | -1.65960200 | -0.14330600 | -0.08355800 |

## Molecule: Cu-SER-01

|    |             |             |             |
|----|-------------|-------------|-------------|
| N  | 1.99247700  | -1.78058900 | 0.10240200  |
| H  | 1.74431000  | -2.00064600 | -0.86720700 |
| H  | 1.52196300  | -2.45332200 | 0.71358800  |
| H  | 3.00299600  | -1.90507300 | 0.21262300  |
| C  | 1.60829600  | -0.38116800 | 0.44966000  |
| H  | 1.83863000  | -0.22299400 | 1.50002900  |
| C  | 2.41346300  | 0.57467800  | -0.42978800 |
| C  | 0.12482700  | -0.20622100 | 0.22930300  |
| H  | 3.47624700  | 0.39243100  | -0.24395800 |
| H  | 2.19571900  | 0.36783600  | -1.48158200 |
| O  | 2.03827200  | 1.89323100  | -0.07196000 |
| O  | -0.45090900 | -0.74406700 | -0.76096200 |
| H  | 2.43480500  | 2.49992400  | -0.70987900 |
| O  | -0.56599700 | 0.49746800  | 1.02139300  |
| Cu | -2.17974000 | 0.09273000  | -0.09804300 |

## Molecule: Cu-SER-02

|    |             |             |             |
|----|-------------|-------------|-------------|
| N  | -2.71754600 | 0.68285500  | -0.21284200 |
| H  | -2.99507300 | 0.72863500  | 0.77209200  |
| H  | -3.22285200 | -0.10296100 | -0.63086400 |
| H  | -2.99795500 | 1.55188400  | -0.67301500 |
| C  | -1.25221600 | 0.45581400  | -0.34775400 |
| H  | -1.00469600 | 0.57185000  | -1.40369800 |
| C  | -0.50507800 | 1.51084400  | 0.45651700  |
| C  | -0.95372700 | -0.99784000 | 0.04886500  |
| H  | -0.94927600 | 2.49114600  | 0.28528900  |
| H  | -0.52024800 | 1.27978400  | 1.52176100  |
| O  | 0.85503800  | 1.54479300  | -0.02511500 |
| O  | -1.88745400 | -1.77697300 | 0.21552000  |
| H  | 1.37106300  | 2.13866600  | 0.54246000  |
| O  | 0.28331900  | -1.33780300 | 0.16072200  |
| Cu | 1.77933700  | -0.23076000 | -0.09237600 |

## Molecule: Cu-SER-03

|    |             |             |             |
|----|-------------|-------------|-------------|
| N  | 1.83495900  | 1.53693500  | -0.12039700 |
| H  | 1.52739200  | 1.77440400  | 0.82684300  |
| H  | 1.41406400  | 2.20519400  | -0.76894700 |
| H  | 2.85422500  | 1.62886900  | -0.16170600 |
| C  | 1.46677300  | 0.13220200  | -0.46572400 |
| H  | 1.72148300  | -0.01640200 | -1.51486800 |
| C  | 2.27772100  | -0.82285700 | 0.40173700  |
| C  | -0.01757200 | -0.08341100 | -0.29683600 |
| H  | 2.03239900  | -0.66439700 | 1.45439100  |
| H  | 2.01348900  | -1.84455500 | 0.12574700  |
| O  | 3.65300200  | -0.55694200 | 0.15325400  |
| O  | -0.72887600 | 0.87575600  | 0.16848100  |
| H  | 4.14320600  | -0.68933300 | 0.97368900  |
| O  | -0.54318200 | -1.16975300 | -0.59727600 |
| Cu | -2.41241600 | -0.05863500 | 0.14747900  |

## Molecule: Cu-SER-04

|    |             |             |             |
|----|-------------|-------------|-------------|
| N  | 0.73956600  | -0.06713500 | 1.98664800  |
| H  | -0.24837900 | -0.33244600 | 1.94499400  |
| H  | 0.81274100  | 0.83552800  | 2.46234500  |
| H  | 1.22781600  | -0.76595200 | 2.55448200  |
| C  | 1.34536600  | -0.00695300 | 0.62166700  |
| H  | 2.38958400  | 0.25903200  | 0.75627800  |
| C  | 1.23625500  | -1.38237600 | -0.02592400 |
| C  | 0.70485300  | 1.11057600  | -0.21554500 |
| H  | 1.86452200  | -2.08237000 | 0.53264900  |
| H  | 0.20478500  | -1.75254800 | 0.01571300  |
| O  | 1.67910100  | -1.24168200 | -1.36601800 |
| O  | -0.57713800 | 1.11283000  | -0.39554200 |
| H  | 1.58057000  | -2.09391300 | -1.80921600 |
| O  | 1.42865500  | 1.97840500  | -0.68721900 |
| Cu | -1.82663400 | -0.23176900 | -0.10533600 |

## Molecule: Fe-SER-01

|    |             |             |             |
|----|-------------|-------------|-------------|
| N  | -1.84286000 | 1.82763900  | 0.10529700  |
| H  | -1.59552100 | 2.06350900  | -0.86130600 |
| H  | -1.33515100 | 2.46496800  | 0.72521300  |
| H  | -2.84604000 | 1.99394200  | 0.22692900  |
| C  | -1.52652400 | 0.40386000  | 0.41520700  |
| H  | -1.79688000 | 0.21704900  | 1.45335100  |
| C  | -2.35051300 | -0.50713000 | -0.50666500 |
| C  | -0.05346000 | 0.18923700  | 0.23717300  |
| H  | -3.37968500 | -0.13522000 | -0.49592600 |
| H  | -1.96724400 | -0.44640200 | -1.52758900 |
| O  | -2.27023300 | -1.82266900 | 0.00550400  |
| O  | 0.65738400  | 1.03141100  | -0.39402600 |
| H  | -2.40626600 | -2.44018200 | -0.72385500 |
| O  | 0.54774700  | -0.84050100 | 0.67502500  |
| Fe | 2.32040800  | -0.15280200 | -0.10385400 |

## Molecule: Fe-SER-02

|    |             |             |             |
|----|-------------|-------------|-------------|
| N  | -2.72412800 | 0.63252700  | -0.16692800 |
| H  | -2.98095400 | 0.59302400  | 0.82480200  |
| H  | -3.25334700 | -0.09708800 | -0.65194800 |
| H  | -3.00698100 | 1.54490800  | -0.53706800 |
| C  | -1.26376400 | 0.43119500  | -0.35684900 |
| H  | -1.05231100 | 0.55707500  | -1.41984700 |
| C  | -0.51856400 | 1.50038600  | 0.42790600  |
| C  | -0.89850200 | -1.00513700 | 0.02169600  |
| H  | -0.93042100 | 2.48423600  | 0.21215000  |
| H  | -0.53930200 | 1.30504400  | 1.49969300  |
| O  | 0.84715600  | 1.48904000  | -0.04457900 |
| O  | -1.75298900 | -1.83660900 | 0.23610200  |
| H  | 1.35540600  | 2.21004600  | 0.36583700  |
| O  | 0.38938700  | -1.28459000 | 0.06312300  |
| Fe | 1.91128300  | -0.21255100 | -0.06610800 |

## Molecule: Fe-SER-03

|    |             |             |             |
|----|-------------|-------------|-------------|
| N  | 1.44675100  | 1.50941800  | -0.29602400 |
| H  | 1.02677900  | 1.77161000  | 0.59986400  |
| H  | 0.92943300  | 1.98121800  | -1.04040200 |
| H  | 2.41954000  | 1.83251700  | -0.30466700 |
| C  | 1.44658300  | 0.02803700  | -0.47781100 |
| H  | 1.77667800  | -0.16413600 | -1.49896700 |
| C  | 2.43678700  | -0.58897400 | 0.50541400  |
| C  | 0.05648100  | -0.56257200 | -0.32291500 |
| H  | 2.10845400  | -0.40488500 | 1.53040500  |
| H  | 2.46889500  | -1.66420500 | 0.32793300  |
| O  | 3.70173400  | 0.01220500  | 0.25801500  |
| O  | -0.87990000 | 0.34719400  | -0.10066200 |
| H  | 4.14267800  | 0.16476800  | 1.10210700  |
| O  | -0.14628400 | -1.75120700 | -0.40724400 |
| Fe | -2.69397000 | 0.14587300  | 0.19718800  |

## Molecule: Hg-SER-01

|    |             |             |             |
|----|-------------|-------------|-------------|
| N  | -3.44499200 | 1.36140500  | 0.09887200  |
| H  | -3.15086500 | 1.73128900  | -0.80963700 |
| H  | -3.34404400 | 2.10892200  | 0.78748500  |
| H  | -4.42887200 | 1.07994100  | 0.04941800  |
| C  | -2.61575500 | 0.17551500  | 0.46149400  |
| H  | -2.75011600 | -0.00301400 | 1.52616800  |
| C  | -3.09957400 | -1.02762200 | -0.33856100 |
| C  | -1.15133900 | 0.48157400  | 0.15886500  |
| H  | -2.92500100 | -0.85902700 | -1.40397300 |
| H  | -2.53133400 | -1.90217900 | -0.01892400 |
| O  | -4.48891600 | -1.18573500 | -0.07148200 |
| O  | -0.85110300 | 1.48585600  | -0.47873500 |
| H  | -4.90479200 | -1.58509700 | -0.84529200 |
| O  | -0.34547400 | -0.42095400 | 0.60366100  |
| Hg | 1.68542400  | -0.08638500 | -0.02619600 |

## Molecule: Hg-SER-02

|    |             |             |             |
|----|-------------|-------------|-------------|
| N  | -3.50091200 | 0.42025400  | -0.62522800 |
| H  | -4.01862300 | 0.30109000  | 0.24962600  |
| H  | -3.79149900 | -0.33320900 | -1.25193400 |
| H  | -3.75822600 | 1.31772600  | -1.04291700 |
| C  | -2.03082700 | 0.35622300  | -0.37951700 |
| H  | -1.53869300 | 0.50832600  | -1.33889900 |
| C  | -1.63417600 | 1.48990200  | 0.57308000  |
| C  | -1.69685700 | -1.03610000 | 0.16235100  |
| H  | -2.29611600 | 2.34259900  | 0.40529200  |
| H  | -1.72437200 | 1.17017300  | 1.61132500  |
| O  | -0.28882800 | 1.88587700  | 0.28250300  |
| O  | -2.62084400 | -1.79095600 | 0.46774400  |
| H  | 0.07724400  | 2.31717700  | 1.06683300  |
| O  | -0.45923800 | -1.36619900 | 0.28791900  |
| Hg | 1.25848900  | -0.06569500 | -0.07204400 |

## Molecule: Hg-SER-41

|    |             |             |             |
|----|-------------|-------------|-------------|
| N  | -1.49982900 | -0.24644300 | -1.98353800 |
| H  | -0.50999100 | -0.50122700 | -1.92312200 |
| H  | -1.57188800 | 0.62700100  | -2.51147700 |
| H  | -1.97654300 | -0.97922100 | -2.51681400 |
| C  | -2.13353900 | -0.10653900 | -0.63717500 |
| H  | -3.18881800 | 0.07448400  | -0.82127800 |
| C  | -1.96606100 | -1.40401700 | 0.13666700  |
| C  | -1.61394700 | 1.12029900  | 0.12811800  |
| H  | -2.41465100 | -2.21850600 | -0.43967400 |
| H  | -0.90203200 | -1.62596000 | 0.27952300  |
| O  | -2.62395400 | -1.22312600 | 1.37996000  |
| O  | -0.35833600 | 1.26319300  | 0.40617900  |
| H  | -2.55280500 | -2.04495900 | 1.88132700  |
| O  | -2.43821500 | 1.95443200  | 0.48939200  |
| Hg | 1.26576100  | -0.06526200 | 0.04958000  |

## Molecule: Mn-SER-1

|    |             |             |             |
|----|-------------|-------------|-------------|
| N  | -1.93856300 | 1.79493100  | 0.20931100  |
| H  | -1.68507100 | 2.06585700  | -0.74526700 |
| H  | -1.42637000 | 2.40653600  | 0.84829700  |
| H  | -2.94000200 | 1.95063800  | 0.34824400  |
| C  | -1.57744100 | 0.36562000  | 0.44905400  |
| H  | -1.73171500 | 0.16224600  | 1.50579900  |
| C  | -2.50558400 | -0.50433400 | -0.39335300 |
| C  | -0.10207000 | 0.17915200  | 0.10183900  |
| H  | -3.53887500 | -0.24746100 | -0.13863800 |
| H  | -2.34396400 | -0.29204800 | -1.45516300 |
| O  | -2.22930800 | -1.86294200 | -0.09184200 |
| O  | 0.41645100  | 0.94918000  | -0.74073700 |
| H  | -2.83894200 | -2.40802500 | -0.60535300 |
| O  | 0.52248500  | -0.74050800 | 0.69931400  |
| Mn | 2.62033700  | -0.12842900 | -0.04408900 |

## Molecule: Mn-SER-2

|    |             |             |             |
|----|-------------|-------------|-------------|
| N  | -2.64384600 | 0.63428300  | -0.49668200 |
| H  | -3.11397400 | 0.53911600  | 0.40699000  |
| H  | -3.05289400 | -0.06245800 | -1.12157200 |
| H  | -2.82846700 | 1.56833500  | -0.86838900 |
| C  | -1.17523000 | 0.40020300  | -0.35229000 |
| H  | -0.73963700 | 0.53045600  | -1.34197600 |
| C  | -0.58839600 | 1.45582900  | 0.58915300  |
| C  | -0.95584200 | -1.04969200 | 0.11272800  |
| H  | -1.21962800 | 2.34771700  | 0.56986100  |
| H  | -0.54616300 | 1.08204400  | 1.61308100  |
| O  | 0.72175600  | 1.79704400  | 0.12523600  |
| O  | -1.95888200 | -1.73084400 | 0.38018200  |
| H  | 1.15998600  | 2.31627300  | 0.81299200  |
| O  | 0.24548900  | -1.44857800 | 0.19154800  |
| Mn | 2.12390400  | -0.26162000 | -0.17069900 |

## Molecule: Mn-SER-3

|    |             |             |             |
|----|-------------|-------------|-------------|
| N  | 2.27718300  | 1.38437300  | -0.14772400 |
| H  | 1.91429500  | 1.80273400  | 0.71467700  |
| H  | 2.19473900  | 2.08224700  | -0.88833100 |
| H  | 3.26343000  | 1.13702500  | -0.03034900 |
| C  | 1.48178900  | 0.16012600  | -0.46216100 |
| H  | 1.60143800  | -0.04635600 | -1.52328700 |
| C  | 2.02260100  | -0.99793800 | 0.36209800  |
| C  | 0.01110900  | 0.41893900  | -0.13298100 |
| H  | 1.88405700  | -0.79228300 | 1.42671600  |
| H  | 1.46330400  | -1.89712000 | 0.09933600  |
| O  | 3.40734300  | -1.13951000 | 0.05248200  |
| O  | -0.27701100 | 1.41057400  | 0.55569000  |
| H  | 3.84376300  | -1.56852800 | 0.79877500  |
| O  | -0.80087200 | -0.45214600 | -0.57976400 |
| Mn | -2.87335900 | -0.25785700 | 0.06430100  |

## Molecule: Mn-SER-41

|    |             |             |             |
|----|-------------|-------------|-------------|
| N  | 0.67272300  | 0.17829900  | 1.97909200  |
| H  | -0.34376800 | 0.13749400  | 1.85797100  |
| H  | 0.89879800  | 1.06471600  | 2.43461000  |
| H  | 0.96596200  | -0.58348800 | 2.59569700  |
| C  | 1.33394600  | 0.08457700  | 0.64136800  |
| H  | 2.38201100  | 0.33514100  | 0.77671900  |
| C  | 1.19392200  | -1.35312200 | 0.15015500  |
| C  | 0.68778100  | 1.10454200  | -0.31286200 |
| H  | 1.75281200  | -2.00850700 | 0.82485600  |
| H  | 0.14264200  | -1.65835000 | 0.18240700  |
| O  | 1.70477000  | -1.41620000 | -1.17094100 |
| O  | -0.57429900 | 1.27475200  | -0.20447700 |
| H  | 1.63448100  | -2.33076800 | -1.47166200 |
| O  | 1.42767300  | 1.69405500  | -1.10630300 |
| Mn | -2.07604200 | -0.30564700 | -0.16289800 |

|                     |             |             |             |                     |             |             |             |                     |             |             |             |                     |             |             |             |
|---------------------|-------------|-------------|-------------|---------------------|-------------|-------------|-------------|---------------------|-------------|-------------|-------------|---------------------|-------------|-------------|-------------|
| Molecule: Ni-SER-01 |             |             |             | Molecule: Ni-SER-02 |             |             |             | Molecule: Ni-SER-03 |             |             |             | Molecule: Ni-SER-04 |             |             |             |
| N                   | -1.90180000 | 1.80854400  | 0.13547000  | N                   | -2.67816800 | 0.71783300  | -0.22707200 | N                   | 1.88207500  | 1.54227100  | -0.02787300 | N                   | 0.85874000  | -0.04701100 | 1.99671600  |
| H                   | -1.67652500 | 2.03865700  | -0.83731500 | H                   | -2.95942000 | 0.77787900  | 0.75611700  | H                   | 1.64542800  | 1.74197000  | 0.94840800  | H                   | -0.08639600 | -0.44184500 | 1.98858000  |
| H                   | -1.38465000 | 2.45167400  | 0.74091700  | H                   | -3.19817300 | -0.06071800 | -0.64090000 | H                   | 1.46814500  | 2.27165000  | -0.61300300 | H                   | 0.82470400  | 0.84845100  | 2.49115500  |
| H                   | -2.90269300 | 1.96856200  | 0.28138200  | H                   | -2.93828500 | 1.58817400  | -0.69682400 | H                   | 2.90095400  | 1.57788400  | -0.12577000 | H                   | 1.46348600  | -0.68128300 | 2.52621500  |
| C                   | -1.56013100 | 0.38992400  | 0.44519800  | C                   | -1.21779000 | 0.45967500  | -0.35338900 | C                   | 1.40891400  | 0.18548700  | -0.42800400 | C                   | 1.39095800  | 0.12641300  | 0.61058300  |
| H                   | -1.78489300 | 0.21363400  | 1.49454000  | H                   | -0.96123800 | 0.57030500  | -1.40790700 | H                   | 1.61799000  | 0.07228900  | -1.49252200 | H                   | 2.39119600  | 0.54021700  | 0.70357100  |
| C                   | -2.41539200 | -0.51721100 | -0.44153400 | C                   | -0.45884000 | 1.50327100  | 0.45707700  | C                   | 2.17056900  | -0.87266900 | 0.35791700  | C                   | 1.44916300  | -1.24361400 | -0.06051700 |
| C                   | -0.08486700 | 0.18022800  | 0.21704100  | C                   | -0.94833300 | -0.99800000 | 0.04736900  | C                   | -0.07616100 | 0.07658900  | -0.22647100 | C                   | 0.54951700  | 1.12428000  | -0.18573400 |
| H                   | -3.46476300 | -0.26861900 | -0.25496100 | H                   | -0.87022000 | 2.49352400  | 0.26717700  | H                   | 1.99368100  | -0.73482300 | 1.42792300  | H                   | 2.07832600  | -1.90010200 | 0.54844200  |
| H                   | -2.18474500 | -0.31843100 | -1.49221500 | H                   | -0.49431400 | 1.28236300  | 1.52368200  | H                   | 1.79978700  | -1.85445500 | 0.05988000  | H                   | 0.44285900  | -1.67742300 | -0.10913300 |
| O                   | -2.12858300 | -1.85838000 | -0.09034800 | O                   | 0.91487400  | 1.50538000  | 0.00095500  | O                   | 3.54485200  | -0.70918900 | 0.03752200  | O                   | 1.98908500  | -1.05414900 | -1.35592900 |
| O                   | 0.54828800  | 0.87606000  | -0.63498700 | O                   | -1.89307700 | -1.74899100 | 0.25703100  | O                   | -0.76056800 | 1.05992300  | 0.18765600  | O                   | -0.75872800 | 1.02472400  | -0.09678100 |
| H                   | -2.57265900 | -2.43344800 | -0.72659200 | H                   | 1.42426300  | 2.14368000  | 0.52593500  | H                   | 4.07201800  | -1.10606000 | 0.74207200  | H                   | 1.94977800  | -1.89765800 | -1.82443900 |
| O                   | 0.55276900  | -0.69676000 | 0.87007000  | O                   | 0.28681300  | -1.36657600 | 0.11253400  | O                   | -0.67374800 | -1.01422400 | -0.46942000 | O                   | 1.08856400  | 1.97845800  | -0.85832100 |
| Ni                  | 2.20950200  | -0.11417300 | -0.09414800 | Ni                  | 1.78662400  | -0.24029400 | -0.09315300 | Ni                  | -2.37774100 | -0.13546000 | 0.10647900  | Ni                  | -1.92729700 | -0.36057200 | -0.14282700 |
| Molecule: Zn-SER-01 |             |             |             | Molecule: Zn-SER-02 |             |             |             | Molecule: Zn-SER-03 |             |             |             | Molecule: Zn-SER-04 |             |             |             |
| N                   | -2.51820700 | 1.49846200  | 0.28149200  | N                   | -2.75154400 | 0.68470200  | -0.18822600 | N                   | 1.76390900  | 1.54354700  | -0.30033300 | N                   | 0.70179400  | -0.14355700 | 1.99143200  |
| H                   | -2.42250500 | 1.81994400  | -0.68668700 | H                   | -2.98645800 | 0.83334700  | 0.79736900  | H                   | 1.27013000  | 1.84455900  | 0.54340000  | H                   | -0.29482200 | -0.36244200 | 1.92014200  |
| H                   | -2.16741900 | 2.23965900  | 0.89183300  | H                   | -3.26095600 | -0.15065700 | -0.49049100 | H                   | 1.38265200  | 2.06869200  | -1.08914000 | H                   | 0.80160100  | 0.73584700  | 2.50387600  |
| H                   | -3.51000100 | 1.35434400  | 0.48761700  | H                   | -3.06246700 | 1.49789000  | -0.72310400 | H                   | 2.75848900  | 1.76515200  | -0.20193900 | H                   | 1.14539200  | -0.88428900 | 2.54209400  |
| C                   | -1.74123700 | 0.24030800  | 0.47783600  | C                   | -1.28792000 | 0.44811900  | -0.36083100 | C                   | 1.60064100  | 0.07276100  | -0.50517600 | C                   | 1.34956700  | -0.05190800 | 0.64463400  |
| H                   | -1.75072500 | 0.00762300  | 1.53882500  | H                   | -1.06653000 | 0.56646900  | -1.42172300 | H                   | 1.99283500  | -0.15602000 | -1.49458600 | H                   | 2.39734800  | 0.16837100  | 0.82694200  |
| C                   | -2.42579200 | -0.86665800 | -0.32017500 | C                   | -0.54127800 | 1.52045100  | 0.43202700  | C                   | 2.40515600  | -0.66407800 | 0.55325200  | C                   | 1.22089300  | -1.39742100 | -0.05681100 |
| C                   | -0.31161500 | 0.47643700  | -0.01168700 | C                   | -0.99858600 | -1.01765300 | 0.02122000  | C                   | 0.13146900  | -0.33487700 | -0.44732100 | C                   | 0.77698300  | 1.11648000  | -0.18003000 |
| H                   | -3.46658500 | -0.93767200 | 0.01044500  | H                   | -1.02010000 | 2.48564700  | 0.26579700  | H                   | 2.03578200  | -0.40165900 | 1.54856700  | H                   | 1.78628200  | -2.14348400 | 0.50973700  |
| H                   | -2.41228500 | -0.60812700 | -1.38350400 | H                   | -0.54601200 | 1.28904600  | 1.49796500  | H                   | 2.27334600  | -1.73573900 | 0.39787300  | H                   | 0.17576700  | -1.72703500 | -0.09206400 |
| O                   | -1.72717900 | -2.07709400 | -0.07512300 | O                   | 0.81157300  | 1.59548600  | -0.05650000 | O                   | 3.76787200  | -0.27885000 | 0.40026700  | O                   | 1.75070700  | -1.23100500 | -1.36283900 |
| O                   | -0.11849400 | 1.24334300  | -0.95718800 | O                   | -1.95910600 | -1.74869800 | 0.27751600  | O                   | -0.68089200 | 0.58222800  | -0.06196100 | O                   | -0.48776300 | 1.16743300  | -0.40474100 |
| H                   | -2.11997700 | -2.76293500 | -0.62961300 | H                   | 1.28511800  | 2.28054400  | 0.43689400  | H                   | 4.22710800  | -0.44168000 | 1.23363900  | H                   | 1.66243300  | -2.06891000 | -1.83434800 |
| O                   | 0.57708100  | -0.19573300 | 0.62244200  | O                   | 0.21924800  | -1.40981400 | 0.00883100  | O                   | -0.16088500 | -1.49317500 | -0.74365400 | O                   | 1.57039600  | 1.95832400  | -0.59752900 |
| Zn                  | 2.41658500  | -0.08222400 | 0.00679100  | Zn                  | 1.81037300  | -0.22655000 | -0.04794700 | Zn                  | -2.55066900 | 0.04424700  | 0.22675900  | Zn                  | -1.84459800 | -0.19580300 | -0.12807600 |

## Molecule: Cd-PHE-01

|    |             |             |             |
|----|-------------|-------------|-------------|
| N  | 0.00310600  | 3.33195000  | -0.04440200 |
| H  | -0.41077300 | 3.38261800  | 0.89031300  |
| H  | -0.72329400 | 3.58152700  | -0.71949400 |
| H  | 0.75701600  | 4.02008600  | -0.10761400 |
| C  | 0.53013200  | 1.95521000  | -0.30481500 |
| H  | 0.88054200  | 1.93909800  | -1.33322700 |
| C  | 1.68850300  | 1.67819700  | 0.66371500  |
| C  | -0.61330900 | 0.96322800  | -0.15144900 |
| H  | 2.38349800  | 2.51655300  | 0.57486400  |
| H  | 1.30012200  | 1.67214300  | 1.68319100  |
| C  | 2.40704000  | 0.38973000  | 0.36792900  |
| O  | -1.61499600 | 1.28994300  | 0.53099000  |
| C  | 2.27124900  | -0.71098700 | 1.21041500  |
| C  | 3.21335600  | 0.27733800  | -0.76554900 |
| H  | 1.64621800  | -0.63167900 | 2.09130300  |
| C  | 2.92787300  | -1.90448000 | 0.92761500  |
| C  | 3.86675800  | -0.91385800 | -1.05314900 |
| H  | 3.32721800  | 1.12889800  | -1.42571700 |
| H  | 2.81646000  | -2.75074000 | 1.59341600  |
| C  | 3.72450300  | -2.01001800 | -0.20674700 |
| H  | 4.48950300  | -0.98691400 | -1.93566800 |
| H  | 4.23587500  | -2.93787000 | -0.42859200 |
| O  | -0.49436500 | -0.15961300 | -0.71753700 |
| Cd | -2.58220600 | -0.86762800 | -0.06682000 |

## Molecule: Cu-PHE-01

|    |             |             |             |
|----|-------------|-------------|-------------|
| N  | -1.23900900 | 2.96648100  | 0.01444800  |
| H  | -1.60036600 | 2.90519800  | 0.97045500  |
| H  | -2.03862600 | 3.02919500  | -0.62092100 |
| H  | -0.69273700 | 3.82795500  | -0.06900400 |
| C  | -0.37904900 | 1.78600700  | -0.30552700 |
| H  | -0.05075400 | 1.89740400  | -1.33625900 |
| C  | 0.82657000  | 1.76954400  | 0.64836900  |
| C  | -1.21391900 | 0.53589100  | -0.19873000 |
| H  | 1.32397900  | 2.73578300  | 0.53837300  |
| H  | 0.45798100  | 1.69483300  | 1.67243300  |
| C  | 1.79203200  | 0.65197500  | 0.35943700  |
| O  | -2.29160400 | 0.51644600  | 0.45619800  |
| C  | 1.91749200  | -0.41711100 | 1.24352900  |
| C  | 2.56466200  | 0.66317700  | -0.80238100 |
| H  | 1.31946900  | -0.43355200 | 2.14645800  |
| C  | 2.80095500  | -1.45753400 | 0.97551300  |
| C  | 3.44358600  | -0.37702500 | -1.07527000 |
| H  | 2.47550700  | 1.49002100  | -1.49685400 |
| H  | 2.89210900  | -2.27948100 | 1.67405500  |
| C  | 3.56441800  | -1.44120600 | -0.18583100 |
| H  | 4.03672500  | -0.35654100 | -1.98062600 |
| H  | 4.25175000  | -2.25025300 | -0.39690200 |
| O  | -0.83182100 | -0.52881400 | -0.77451200 |
| Cu | -2.43500200 | -1.48997600 | -0.09001700 |

## Molecule: Cd-PHE-02

|    |             |             |             |
|----|-------------|-------------|-------------|
| N  | -3.35201000 | 0.63937900  | -1.04150500 |
| H  | -3.87528400 | 1.09410100  | -0.28700900 |
| H  | -3.80135700 | -0.25863900 | -1.23192100 |
| H  | -3.40472700 | 1.21574300  | -1.88454300 |
| C  | -1.93142000 | 0.44884000  | -0.61299000 |
| H  | -1.44674300 | -0.17005600 | -1.36494800 |
| C  | -1.25605600 | 1.82764300  | -0.52941300 |
| C  | -1.95113400 | -0.26812400 | 0.74488300  |
| H  | -1.39285900 | 2.31937600  | -1.49433500 |
| H  | -1.76999800 | 2.41945200  | 0.22997700  |
| C  | 0.20844200  | 1.71813700  | -0.21099900 |
| O  | -2.88505900 | -0.01050500 | 1.51342700  |
| C  | 0.66308000  | 1.81396500  | 1.10283300  |
| C  | 1.12743300  | 1.43270000  | -1.22496900 |
| H  | -0.04315900 | 2.03367800  | 1.89388200  |
| C  | 2.00475400  | 1.60881800  | 1.40525800  |
| C  | 2.46914300  | 1.21319300  | -0.92267300 |
| H  | 0.78641100  | 1.36536100  | -2.25080200 |
| H  | 2.34202700  | 1.68343100  | 2.43100800  |
| C  | 2.90904100  | 1.29740700  | 0.39620000  |
| H  | 3.16863200  | 0.98281800  | -1.71568800 |
| H  | 3.95122500  | 1.12672400  | 0.63240600  |
| O  | -0.99854400 | -1.07372800 | 1.02952300  |
| Cd | 0.71998000  | -1.58685900 | -0.18541400 |

## Molecule: Cu-PHE-02

|    |             |             |             |
|----|-------------|-------------|-------------|
| N  | -2.97762700 | 1.71138600  | -0.22726900 |
| H  | -3.40715400 | 1.70801200  | 0.70197700  |
| H  | -3.67787200 | 1.36692200  | -0.88725600 |
| H  | -2.73499900 | 2.67417900  | -0.47187500 |
| C  | -1.76058900 | 0.84451200  | -0.24764800 |
| H  | -1.35149600 | 0.91017000  | -1.25416800 |
| C  | -0.74703900 | 1.37294400  | 0.78363500  |
| C  | -2.21771100 | -0.59569500 | 0.00839200  |
| H  | -0.81880500 | 2.46219600  | 0.78332700  |
| H  | -1.02395700 | 1.02258600  | 1.77741400  |
| C  | 0.67811500  | 1.00387800  | 0.47065000  |
| O  | -3.39314100 | -0.81513900 | 0.28723400  |
| C  | 1.35639700  | 0.02666900  | 1.23280900  |
| C  | 1.36615200  | 1.63544300  | -0.57524000 |
| H  | 0.85756900  | -0.42457100 | 2.08153000  |
| C  | 2.70230900  | -0.27252000 | 0.96784600  |
| C  | 2.68858800  | 1.32567000  | -0.83549500 |
| H  | 0.85508900  | 2.38214400  | -1.16911700 |
| H  | 3.21339300  | -1.00530800 | 1.57669600  |
| C  | 3.36172900  | 0.37152400  | -0.06604600 |
| H  | 3.20779600  | 1.82829200  | -1.64052500 |
| H  | 4.39767800  | 0.14206800  | -0.27510200 |
| O  | -1.34101700 | -1.53657800 | -0.09585300 |
| Cu | 0.50454200  | -1.39680000 | -0.39987900 |

## Molecule: Fe-PHE-011

|    |             |             |             |
|----|-------------|-------------|-------------|
| N  | -1.32964900 | 2.94766300  | 0.01792800  |
| H  | -1.72928900 | 2.84453400  | 0.95586700  |
| H  | -2.09905200 | 3.03672100  | -0.65182200 |
| H  | -0.78814400 | 3.81721800  | -0.00108500 |
| C  | -0.43617900 | 1.79894900  | -0.31979700 |
| H  | -0.05657000 | 1.95880100  | -1.32561500 |
| C  | 0.71741600  | 1.72953900  | 0.70237900  |
| C  | -1.22940200 | 0.52675000  | -0.29385900 |
| H  | 1.22453900  | 2.69441500  | 0.65804700  |
| H  | 0.28436000  | 1.61434600  | 1.69717400  |
| C  | 1.68233300  | 0.61278800  | 0.41124500  |
| O  | -2.14016000 | 0.32315400  | 0.57508100  |
| C  | 1.53422000  | -0.63016600 | 1.02577600  |
| C  | 2.72325400  | 0.80002300  | -0.49760600 |
| H  | 0.72824300  | -0.78187400 | 1.73372900  |
| C  | 2.40941600  | -1.67035300 | 0.73530000  |
| C  | 3.60187800  | -0.23694000 | -0.78608400 |
| H  | 2.84797300  | 1.76462500  | -0.97447500 |
| H  | 2.28424800  | -2.63034100 | 1.21940100  |
| C  | 3.44588200  | -1.47535800 | -0.17123000 |
| H  | 4.41084500  | -0.07748200 | -1.48733800 |
| H  | 4.13113900  | -2.28271800 | -0.39483200 |
| O  | -0.98783600 | -0.42826400 | -1.08241100 |
| Fe | -2.44614200 | -1.55701600 | -0.08971700 |

## Molecule: Hg-PHE-01

|    |             |             |             |
|----|-------------|-------------|-------------|
| N  | 0.92746000  | 3.52397400  | 0.05774000  |
| H  | 0.46973000  | 3.52020800  | 0.97404200  |
| H  | 0.27983300  | 3.93192100  | -0.62042100 |
| H  | 1.75557500  | 4.12287200  | 0.11270400  |
| C  | 1.32102400  | 2.13485000  | -0.33538300 |
| H  | 1.71893700  | 2.18398200  | -1.34412600 |
| C  | 2.38082200  | 1.62165200  | 0.65494900  |
| C  | 0.09262200  | 1.23583000  | -0.31949900 |
| H  | 3.24860800  | 2.27685600  | 0.56240400  |
| H  | 1.98058000  | 1.72493200  | 1.66488200  |
| C  | 2.76860900  | 0.19067300  | 0.39848200  |
| O  | -0.76367900 | 1.42417000  | 0.59105200  |
| C  | 2.15843100  | -0.84177400 | 1.11033500  |
| C  | 3.70925000  | -0.12695600 | -0.58053400 |
| H  | 1.42567100  | -0.60192000 | 1.87126500  |
| C  | 2.47896300  | -2.16850300 | 0.84686900  |
| C  | 4.03230700  | -1.45246300 | -0.84534500 |
| H  | 4.18889700  | 0.66943800  | -1.13666500 |
| H  | 1.99837200  | -2.96009800 | 1.40744400  |
| C  | 3.41625500  | -2.47704900 | -0.13300700 |
| H  | 4.76612700  | -1.68598500 | -1.60606300 |
| H  | 3.66848000  | -3.50944200 | -0.33819300 |
| O  | 0.01779700  | 0.31921400  | -1.16629300 |
| Hg | -2.00219600 | -0.46231500 | -0.02663400 |

## Molecule: Fe-PHE-021

|    |             |             |             |
|----|-------------|-------------|-------------|
| N  | 3.16995200  | -1.06600700 | -0.74806000 |
| H  | 3.66168100  | -1.21964200 | 0.13744700  |
| H  | 3.69965600  | -0.37449700 | -1.28492700 |
| H  | 3.15813400  | -1.94452900 | -1.27278800 |
| C  | 1.77386600  | -0.59549400 | -0.49164800 |
| H  | 1.34443600  | -0.32279100 | -1.45190900 |
| C  | 0.97628600  | -1.74528400 | 0.15539300  |
| C  | 1.87599100  | 0.63264700  | 0.41286000  |
| H  | 1.12004600  | -2.62461800 | -0.47544900 |
| H  | 1.39291100  | -1.95348400 | 1.14137500  |
| C  | -0.47990800 | -1.40228000 | 0.24189200  |
| O  | 2.78898800  | 0.74093300  | 1.20752900  |
| C  | -1.02648300 | -0.86877200 | 1.40867300  |
| C  | -1.27838900 | -1.47467400 | -0.90984300 |
| H  | -0.42138300 | -0.80725100 | 2.30391500  |
| C  | -2.32463900 | -0.36007300 | 1.40727900  |
| C  | -2.58348600 | -0.98954700 | -0.90391100 |
| H  | -0.86345100 | -1.89945700 | -1.81520000 |
| H  | -2.72904600 | 0.07700800  | 2.31056100  |
| C  | -3.10237500 | -0.41222900 | 0.25014700  |
| H  | -3.18565200 | -1.05279700 | -1.80017500 |
| H  | -4.10880800 | -0.01607700 | 0.25691500  |
| O  | 0.94990900  | 1.55501600  | 0.29470600  |
| Fe | -0.69825200 | 1.71257000  | -0.54831800 |

## Molecule: Hg-PHE-02

|    |             |             |             |
|----|-------------|-------------|-------------|
| N  | -3.55851300 | 0.25408100  | -1.07250000 |
| H  | -4.17665800 | 0.56568000  | -0.31665900 |
| H  | -3.80902200 | -0.71048600 | -1.30154200 |
| H  | -3.71568500 | 0.83763800  | -1.89733200 |
| C  | -2.13703300 | 0.34472100  | -0.61730600 |
| H  | -1.52676400 | -0.18554800 | -1.34434900 |
| C  | -1.73440600 | 1.82808900  | -0.54539500 |
| C  | -2.05693100 | -0.32826200 | 0.75598300  |
| H  | -1.96982500 | 2.27537400  | -1.51339700 |
| H  | -2.34890200 | 2.31610100  | 0.21315000  |
| C  | -0.27384600 | 2.00136000  | -0.23621600 |
| O  | -3.04309700 | -0.27978900 | 1.49059400  |
| C  | 0.15691300  | 2.27463500  | 1.05983500  |
| C  | 0.68087000  | 1.80993300  | -1.24081000 |
| H  | -0.57603900 | 2.42008500  | 1.84366600  |
| C  | 1.51462200  | 2.33647900  | 1.35740500  |
| C  | 2.04071800  | 1.85903200  | -0.94162600 |
| H  | 0.35674800  | 1.61555400  | -2.25575800 |
| H  | 1.83357500  | 2.54287200  | 2.37088500  |
| C  | 2.45891000  | 2.11761100  | 0.36179300  |
| H  | 2.76925500  | 1.70693500  | -1.72730100 |
| H  | 3.51511000  | 2.15550000  | 0.59416300  |
| O  | -0.95840900 | -0.89329800 | 1.12914900  |
| Hg | 0.78338700  | -1.16744000 | -0.09797400 |

## Molecule: Mn-PHE-01

|    |             |             |             |
|----|-------------|-------------|-------------|
| N  | -1.19444800 | 3.10659200  | 0.01737000  |
| H  | -1.59664500 | 2.96388100  | 0.94796400  |
| H  | -1.96502500 | 3.23763700  | -0.64160800 |
| H  | -0.63015200 | 3.95967600  | 0.02908900  |
| C  | -0.35990000 | 1.92217800  | -0.35895900 |
| H  | -0.05884000 | 2.05548500  | -1.39375900 |
| C  | 0.86373700  | 1.86957400  | 0.56789300  |
| C  | -1.21075600 | 0.66421800  | -0.22642800 |
| H  | 1.45420000  | 2.76918700  | 0.38540600  |
| H  | 0.51141200  | 1.89805500  | 1.60053800  |
| C  | 1.69918100  | 0.63721500  | 0.34918800  |
| O  | -2.02834500 | 0.58678500  | 0.72136300  |
| C  | 1.53362600  | -0.47821700 | 1.16929500  |
| C  | 2.61838500  | 0.57492700  | -0.69750500 |
| H  | 0.81826400  | -0.43746800 | 1.98166800  |
| C  | 2.27293900  | -1.63493900 | 0.94995200  |
| C  | 3.36048900  | -0.57924400 | -0.91840300 |
| H  | 2.75126400  | 1.43588600  | -1.34144400 |
| H  | 2.13690900  | -2.49174400 | 1.59747000  |
| C  | 3.18893500  | -1.68812700 | -0.09507500 |
| H  | 4.07279500  | -0.61395500 | -1.73289500 |
| H  | 3.76841200  | -2.58633300 | -0.26534500 |
| O  | -1.01236600 | -0.25606300 | -1.06735500 |
| Mn | -2.49502300 | -1.77231000 | -0.11842000 |

## Molecule: Ni-PHE-01

|    |             |             |             |
|----|-------------|-------------|-------------|
| N  | -1.44732200 | 2.93951800  | 0.05251000  |
| H  | -1.82186400 | 2.78164700  | 0.99279700  |
| H  | -2.23324000 | 3.00191400  | -0.60008900 |
| H  | -0.95911000 | 3.83968700  | 0.05057900  |
| C  | -0.49938000 | 1.85004200  | -0.33385400 |
| H  | -0.19099400 | 2.03180800  | -1.35954000 |
| C  | 0.70961400  | 1.87339900  | 0.61833300  |
| C  | -1.20703900 | 0.52203800  | -0.26696200 |
| H  | 1.21116400  | 2.83012700  | 0.46598200  |
| H  | 0.33727300  | 1.83950900  | 1.64317500  |
| C  | 1.65571600  | 0.72855800  | 0.37530700  |
| O  | -2.03233300 | 0.25778900  | 0.65921500  |
| C  | 1.57406900  | -0.42535400 | 1.15365300  |
| C  | 2.59533700  | 0.78675300  | -0.65326200 |
| H  | 0.84505400  | -0.47622100 | 1.95339500  |
| C  | 2.41631400  | -1.50404400 | 0.90912500  |
| C  | 3.43923000  | -0.28975300 | -0.89871800 |
| H  | 2.66449700  | 1.67959200  | -1.26285300 |
| H  | 2.34483100  | -2.39244000 | 1.52342300  |
| C  | 3.35087100  | -1.43875600 | -0.11852200 |
| H  | 4.16710200  | -0.23198700 | -1.69787500 |
| H  | 4.00949000  | -2.27643400 | -0.30820000 |
| O  | -0.93911100 | -0.38529400 | -1.10928000 |
| Ni | -2.16713500 | -1.60003900 | -0.10280100 |

## Molecule: Zn-PHE-03

|    |             |             |             |
|----|-------------|-------------|-------------|
| N  | -2.92396800 | 1.82862000  | -0.08206500 |
| H  | -3.38720200 | 1.69590600  | 0.82023500  |
| H  | -3.61231800 | 1.62414200  | -0.80933600 |
| H  | -2.63575600 | 2.80612900  | -0.16194700 |
| C  | -1.73920700 | 0.92229100  | -0.20372100 |
| H  | -1.31428700 | 1.11009700  | -1.18756800 |
| C  | -0.72119500 | 1.28361400  | 0.89782200  |
| C  | -2.25932100 | -0.52274500 | -0.15785300 |
| H  | -0.82398500 | 2.35223800  | 1.09989500  |
| H  | -0.96702100 | 0.75368700  | 1.81778600  |
| C  | 0.70835000  | 1.02439200  | 0.50094200  |
| O  | -3.44612100 | -0.70936300 | 0.11697800  |
| C  | 1.49031900  | 0.06796100  | 1.17529700  |
| C  | 1.28491700  | 1.72566600  | -0.55939000 |
| H  | 1.08902900  | -0.42446600 | 2.05484500  |
| C  | 2.81611800  | -0.17744400 | 0.77875200  |
| C  | 2.59753400  | 1.48578900  | -0.93891300 |
| H  | 0.70034100  | 2.47031200  | -1.08468000 |
| H  | 3.40271000  | -0.91126800 | 1.31470800  |
| C  | 3.36491300  | 0.52793000  | -0.28015200 |
| H  | 3.02606200  | 2.04610400  | -1.75953000 |
| H  | 4.38525900  | 0.34238500  | -0.58677900 |
| O  | -1.43981200 | -1.46773100 | -0.44591500 |
| Zn | 0.48126200  | -1.57578600 | -0.18627900 |

## Molecule: Mn-PHE-21

|    |             |             |             |
|----|-------------|-------------|-------------|
| N  | 3.23924000  | -1.01318900 | -0.79492300 |
| H  | 3.72643500  | -1.10714600 | 0.10187800  |
| H  | 3.76579600  | -0.34770000 | -1.36434000 |
| H  | 3.22763900  | -1.91624000 | -1.27368300 |
| C  | 1.84957000  | -0.51586600 | -0.53379100 |
| H  | 1.43136500  | -0.21141300 | -1.48907300 |
| C  | 1.03668400  | -1.66983500 | 0.07421600  |
| C  | 1.97381100  | 0.69056700  | 0.41258500  |
| H  | 1.17641100  | -2.54115800 | -0.56965900 |
| H  | 1.44846700  | -1.90750800 | 1.05634000  |
| C  | -0.42792800 | -1.35033300 | 0.17575300  |
| O  | 2.89373200  | 0.65620300  | 1.24925600  |
| C  | -0.98579300 | -0.91226200 | 1.37687800  |
| C  | -1.24124600 | -1.42697500 | -0.95816000 |
| H  | -0.36346500 | -0.85205600 | 2.26091900  |
| C  | -2.32452800 | -0.53547500 | 1.44167600  |
| C  | -2.57550700 | -1.04103000 | -0.89980600 |
| H  | -0.81825500 | -1.77132300 | -1.89404100 |
| H  | -2.74265300 | -0.19135700 | 2.37864300  |
| C  | -3.11886500 | -0.58726400 | 0.30029100  |
| H  | -3.19048100 | -1.09192100 | -1.78897100 |
| H  | -4.15600400 | -0.28170700 | 0.34492000  |
| O  | 1.13900200  | 1.63463900  | 0.28229900  |
| Mn | -0.94236000 | 1.80303800  | -0.51155000 |

## Molecule: Ni-PHE-02

|    |             |             |             |
|----|-------------|-------------|-------------|
| N  | 3.23289000  | -1.09718600 | -0.76171200 |
| H  | 3.58078600  | -1.49272100 | 0.11643300  |
| H  | 3.90400500  | -0.38807400 | -1.06571600 |
| H  | 3.19495700  | -1.83697100 | -1.46703900 |
| C  | 1.88314700  | -0.49405300 | -0.56342900 |
| H  | 1.60785100  | -0.02505100 | -1.50600400 |
| C  | 0.89856900  | -1.61422900 | -0.19953300 |
| C  | 2.00189700  | 0.58102500  | 0.51980200  |
| H  | 0.95653400  | -2.36641500 | -0.99104800 |
| H  | 1.22292800  | -2.08169000 | 0.73034000  |
| C  | -0.53086500 | -1.17124700 | -0.06588100 |
| O  | 3.00085800  | 0.62295600  | 1.22781400  |
| C  | -1.25029600 | -1.44121300 | 1.09721100  |
| C  | -1.18755000 | -0.49515500 | -1.12272200 |
| H  | -0.75755800 | -1.94632000 | 1.91685200  |
| C  | -2.58409600 | -1.06836700 | 1.21153700  |
| C  | -2.54240000 | -0.12143400 | -0.99798900 |
| H  | -0.68371800 | -0.37049500 | -2.07497900 |
| H  | -3.12140100 | -1.29021500 | 2.12382100  |
| C  | -3.23271800 | -0.39888400 | 0.17431500  |
| H  | -3.03374700 | 0.36882600  | -1.82714400 |
| H  | -4.26820900 | -0.10657500 | 0.27637900  |
| O  | 1.01889300  | 1.41253200  | 0.63429000  |
| Ni | -0.64731400 | 1.43833700  | -0.21845000 |

## Molecule: Zn-PHE-011

|    |             |             |             |
|----|-------------|-------------|-------------|
| N  | -1.15850600 | 3.10384500  | 0.02888300  |
| H  | -1.65422100 | 2.92454900  | 0.90703300  |
| H  | -1.85431200 | 3.30212500  | -0.69446400 |
| H  | -0.57381000 | 3.93494200  | 0.14965200  |
| C  | -0.31518400 | 1.92555100  | -0.33796400 |
| H  | 0.07565200  | 2.10065500  | -1.33586400 |
| C  | 0.82618000  | 1.80108400  | 0.68903000  |
| C  | -1.16875100 | 0.67365800  | -0.32131600 |
| H  | 1.39574300  | 2.73108700  | 0.65089900  |
| H  | 0.38032600  | 1.71487800  | 1.68169500  |
| C  | 1.72580900  | 0.62562000  | 0.41881000  |
| O  | -2.07258900 | 0.55424200  | 0.55051000  |
| C  | 1.49670600  | -0.60001900 | 1.04354400  |
| C  | 2.77559600  | 0.73300500  | -0.49227500 |
| H  | 0.68069200  | -0.69242700 | 1.75018700  |
| C  | 2.29748300  | -1.70005100 | 0.75902900  |
| C  | 3.57983600  | -0.36432300 | -0.77672600 |
| H  | 2.96313000  | 1.68267200  | -0.97867400 |
| H  | 2.10629300  | -2.64626900 | 1.24905800  |
| C  | 3.34003600  | -1.58539800 | -0.15434700 |
| H  | 4.39426500  | -0.26652000 | -1.48314100 |
| H  | 3.96485300  | -2.44084000 | -0.37673600 |
| O  | -0.88632900 | -0.26487000 | -1.11431200 |
| Zn | -2.24813300 | -1.51471700 | -0.07260400 |



## Molecule: Cd-TRP-01

|    |             |             |             |
|----|-------------|-------------|-------------|
| N  | -0.91788300 | 3.37200000  | -0.14678700 |
| H  | -1.44815200 | 3.53886700  | -1.00476400 |
| H  | -0.26549200 | 4.14861300  | -0.01353600 |
| H  | -1.58011100 | 3.36126000  | 0.63416300  |
| C  | -0.17910700 | 2.07210300  | -0.21031500 |
| H  | 0.40345600  | 2.07860300  | -1.12638300 |
| C  | 0.73525500  | 1.96733300  | 1.02225000  |
| C  | -1.18332500 | 0.93253200  | -0.25603800 |
| H  | 1.40750500  | 2.82913800  | 0.98739400  |
| H  | 0.11854900  | 2.06462200  | 1.91791000  |
| C  | 1.50757700  | 0.69409400  | 1.07503800  |
| O  | -2.28331600 | 1.07573900  | 0.35170500  |
| C  | 1.33644800  | -0.31615800 | 1.98422300  |
| C  | 2.53670700  | 0.26051100  | 0.16862800  |
| H  | 0.65985900  | -0.37666700 | 2.82085000  |
| N  | 2.19959500  | -1.35028600 | 1.70541600  |
| C  | 2.94888700  | -1.02885900 | 0.59905500  |
| C  | 3.14335700  | 0.82541400  | -0.96106300 |
| H  | 2.28571400  | -2.19716800 | 2.24345900  |
| C  | 3.94195200  | -1.74898800 | -0.06169000 |
| C  | 4.12947400  | 0.11048600  | -1.62046000 |
| H  | 2.84367400  | 1.80441500  | -1.31396600 |
| H  | 4.24388500  | -2.72981600 | 0.28261200  |
| C  | 4.52477500  | -1.16363500 | -1.17442700 |
| H  | 4.60606600  | 0.53440400  | -2.49508200 |
| H  | 5.29820600  | -1.69749800 | -1.71152600 |
| O  | -0.86908300 | -0.11750100 | -0.86759900 |
| Cd | -2.97870700 | -1.05845200 | -0.23740800 |

## Molecule: Cu-TRP-01

|    |             |             |             |
|----|-------------|-------------|-------------|
| N  | -1.59870900 | 2.99938100  | 0.06928600  |
| H  | -2.14655800 | 3.24495800  | -0.75904300 |
| H  | -0.94367700 | 3.76245400  | 0.25983200  |
| H  | -2.24100800 | 2.92370500  | 0.86348800  |
| C  | -0.84836400 | 1.72145600  | -0.12923300 |
| H  | -0.22358800 | 1.83955300  | -1.01001700 |
| C  | 0.01137900  | 1.43657500  | 1.12361100  |
| C  | -1.82881700 | 0.60045200  | -0.33775300 |
| H  | 0.59444700  | 2.34064500  | 1.31437500  |
| H  | -0.66011900 | 1.28758700  | 1.97095700  |
| C  | 0.91470200  | 0.26548400  | 0.94881300  |
| O  | -2.96151900 | 0.62393400  | 0.23792600  |
| C  | 0.67833700  | -1.02631600 | 1.34356900  |
| C  | 2.18106400  | 0.26178300  | 0.26981700  |
| H  | -0.16411000 | -1.43853300 | 1.87422200  |
| N  | 1.71905700  | -1.83288300 | 0.95029300  |
| C  | 2.66016100  | -1.07430300 | 0.29426600  |
| C  | 2.95758600  | 1.25420800  | -0.34142400 |
| H  | 1.79428500  | -2.81831900 | 1.14393700  |
| C  | 3.88250600  | -1.43296900 | -0.26968600 |
| C  | 4.17451000  | 0.90052500  | -0.90027800 |
| H  | 2.61330800  | 2.28057100  | -0.37110600 |
| H  | 4.23282100  | -2.45674200 | -0.24101300 |
| C  | 4.63133300  | -0.42961900 | -0.86483700 |
| H  | 4.78877400  | 1.65733000  | -1.37111300 |
| H  | 5.58721700  | -0.67389100 | -1.31005100 |
| O  | -1.51283600 | -0.42600700 | -0.99918500 |
| Cu | -3.26778500 | -1.26075400 | -0.35285000 |

## Molecule: Cd-TRP-02

|    |             |             |             |
|----|-------------|-------------|-------------|
| N  | -3.58261500 | -0.30055600 | 1.41406900  |
| H  | -3.98047800 | 0.63586800  | 1.50898400  |
| H  | -3.56428900 | -0.74125100 | 2.33653100  |
| H  | -4.19405600 | -0.83974400 | 0.79201500  |
| C  | -2.21464100 | -0.24815400 | 0.81146100  |
| H  | -1.66119500 | 0.52711300  | 1.33300700  |
| C  | -1.55590200 | -1.62279000 | 1.00432100  |
| C  | -2.37517500 | 0.11192200  | -0.67106000 |
| H  | -1.45667200 | -1.78220400 | 2.08176000  |
| H  | -2.23907500 | -2.38329400 | 0.62093600  |
| C  | -0.23740600 | -1.76788600 | 0.32195300  |
| O  | -3.36592500 | -0.33506500 | -1.26390900 |
| C  | 0.03049300  | -2.61561500 | -0.72331600 |
| C  | 0.97266000  | -1.03862200 | 0.56885300  |
| H  | -0.62170300 | -3.32190700 | -1.21015900 |
| N  | 1.33080000  | -2.46554400 | -1.13512900 |
| C  | 1.93928400  | -1.50486300 | -0.36791000 |
| C  | 1.33501500  | 0.00881500  | 1.44765400  |
| H  | 1.77090300  | -2.98873200 | -1.87521000 |
| C  | 3.23556500  | -1.00513400 | -0.41035200 |
| C  | 2.63804000  | 0.51862100  | 1.38481600  |
| H  | 0.64715300  | 0.35208800  | 2.21124500  |
| H  | 3.95503000  | -1.39071500 | -1.12108900 |
| C  | 3.57303800  | 0.00991400  | 0.47274500  |
| H  | 2.93007500  | 1.30381700  | 2.06881900  |
| H  | 4.57424300  | 0.41855500  | 0.45665400  |
| O  | -1.47431700 | 0.82884700  | -1.22361700 |
| Cd | 0.29747700  | 1.67803300  | -0.29772600 |

## Molecule: Cu-TRP-02

|    |             |             |             |
|----|-------------|-------------|-------------|
| N  | 3.52214700  | -0.09143600 | 1.42255500  |
| H  | 3.95742400  | -1.01410300 | 1.35636000  |
| H  | 3.47199900  | 0.17319500  | 2.40949200  |
| H  | 4.12395300  | 0.57483400  | 0.92955100  |
| C  | 2.16120500  | -0.08763000 | 0.80925100  |
| H  | 1.60421800  | -0.90862100 | 1.25289000  |
| C  | 1.49059400  | 1.26368500  | 1.12512700  |
| C  | 2.31806500  | -0.31157900 | -0.69563300 |
| H  | 1.39127300  | 1.32605700  | 2.21195900  |
| H  | 2.16069800  | 2.06342400  | 0.80476100  |
| C  | 0.16986900  | 1.42892400  | 0.45616900  |
| O  | 3.35380900  | 0.05207900  | -1.24927600 |
| C  | -0.13069600 | 2.30841900  | -0.54486300 |
| C  | -1.00042600 | 0.60258000  | 0.63408400  |
| H  | 0.48544400  | 3.07131200  | -0.99097900 |
| N  | -1.41806600 | 2.10052600  | -0.99295200 |
| C  | -1.98122300 | 1.06730100  | -0.30449500 |
| C  | -1.34316300 | -0.44478900 | 1.52209400  |
| H  | -1.86741200 | 2.62460400  | -1.72757100 |
| C  | -3.24915700 | 0.49767400  | -0.38769300 |
| C  | -2.60559700 | -1.00857600 | 1.42204800  |
| H  | -0.63502000 | -0.78649300 | 2.26504900  |
| H  | -3.97531200 | 0.85751800  | -1.10413200 |
| C  | -3.54171000 | -0.54309700 | 0.47606300  |
| H  | -2.88108500 | -1.81752200 | 2.08473000  |
| H  | -4.51496800 | -1.01272100 | 0.42789100  |
| O  | 1.34174800  | -0.86379500 | -1.33402900 |
| Cu | -0.32209700 | -1.42616700 | -0.66667900 |

## Molecule: Cd-TRP-031

|    |             |             |             |
|----|-------------|-------------|-------------|
| N  | -1.99760000 | 3.02294000  | 0.27033600  |
| H  | -2.50753900 | 3.37613200  | -0.54111100 |
| H  | -1.19975700 | 3.63494200  | 0.45474000  |
| H  | -2.63498300 | 3.06264200  | 1.06952900  |
| C  | -1.53500200 | 1.61914200  | 0.04063400  |
| H  | -0.89059400 | 1.65162300  | -0.83402000 |
| C  | -0.74654400 | 1.14247200  | 1.28440500  |
| C  | -2.76729700 | 0.76286000  | -0.28821600 |
| H  | -0.38815800 | 2.03279800  | 1.80859700  |
| H  | -1.41491200 | 0.61924500  | 1.96752200  |
| C  | 0.45154800  | 0.29691900  | 0.98216400  |
| O  | -3.88539600 | 1.27670100  | -0.16021700 |
| C  | 0.73838100  | -0.96565300 | 1.50719700  |
| C  | 1.63323600  | 0.71139900  | 0.27703100  |
| H  | 0.17426400  | -1.54171700 | 2.22487800  |
| N  | 2.02360100  | -1.32117500 | 1.17015300  |
| C  | 2.58584700  | -0.32992600 | 0.40873000  |
| C  | 1.98191900  | 1.87802400  | -0.41914800 |
| H  | 2.45122000  | -2.20737800 | 1.38797300  |
| C  | 3.85225300  | -0.25290400 | -0.17158400 |
| C  | 3.24250400  | 1.96420900  | -0.97693100 |
| H  | 1.27818400  | 2.69520400  | -0.51302100 |
| H  | 4.56172100  | -1.06380400 | -0.07425100 |
| C  | 4.16355200  | 0.90428300  | -0.86083100 |
| H  | 3.53286600  | 2.85804400  | -1.51306100 |
| H  | 5.14036900  | 1.00280400  | -1.31622200 |
| O  | -2.56927000 | -0.43186500 | -0.69636100 |
| Cd | -0.79687000 | -1.69117800 | -0.37610500 |

## Molecule: Cu-TRP-03

|    |             |             |             |
|----|-------------|-------------|-------------|
| N  | 2.84255900  | -2.20541400 | 0.63456000  |
| H  | 3.52320000  | -2.45261500 | -0.08716500 |
| H  | 2.28183800  | -3.02871600 | 0.86385200  |
| H  | 3.36936400  | -1.92792100 | 1.46698900  |
| C  | 1.96897000  | -1.09081000 | 0.16233800  |
| H  | 1.39705900  | -1.48316000 | -0.67673500 |
| C  | 1.03806700  | -0.65951300 | 1.30054600  |
| C  | 2.87025800  | 0.03241000  | -0.35642600 |
| H  | 0.71430100  | -1.56323400 | 1.82408200  |
| H  | 1.59963100  | -0.05523800 | 2.01375200  |
| C  | -0.20332200 | 0.07778200  | 0.87746300  |
| O  | 4.09063600  | -0.12499900 | -0.37109700 |
| C  | -0.68928500 | 1.21881900  | 1.56155900  |
| C  | -1.37667000 | -0.51329100 | 0.23647900  |
| H  | -0.14994800 | 1.88906600  | 2.21098000  |
| N  | -1.99569200 | 1.37491100  | 1.31807500  |
| C  | -2.46452200 | 0.34323200  | 0.50731800  |
| C  | -1.58715100 | -1.66274600 | -0.52730300 |
| H  | -2.55134500 | 2.15436300  | 1.64302300  |
| C  | -3.74258200 | 0.10918300  | 0.02586600  |
| C  | -2.86607800 | -1.91380100 | -1.00300800 |
| H  | -0.77360800 | -2.34149300 | -0.74373000 |
| H  | -4.55850400 | 0.78507400  | 0.24258200  |
| C  | -3.92679100 | -1.03736500 | -0.73668400 |
| H  | -3.05003100 | -2.80144700 | -1.59339600 |
| H  | -4.91040500 | -1.25992600 | -1.12814300 |
| O  | 2.28457600  | 1.09899400  | -0.76771700 |
| Cu | 0.41563200  | 1.40287600  | -0.78906600 |

|                      |             |             |             |                      |             |             |             |
|----------------------|-------------|-------------|-------------|----------------------|-------------|-------------|-------------|
| Molecule: Fe-TRP-011 |             |             |             | Molecule: Fe-TRP-031 |             |             |             |
| N                    | -1.70324100 | 2.96138500  | 0.08566300  | N                    | -3.09356300 | 1.96797500  | -0.59314500 |
| H                    | -2.26825800 | 3.12404600  | -0.75138800 | H                    | -3.61563400 | 1.71367400  | -1.43481900 |
| H                    | -1.08422100 | 3.76474600  | 0.22201600  | H                    | -2.71927700 | 2.91166900  | -0.71470200 |
| H                    | -2.34323400 | 2.90269000  | 0.88252500  | H                    | -3.75404700 | 1.96445100  | 0.19027700  |
| C                    | -0.91007400 | 1.70490600  | -0.04888500 | C                    | -1.99912300 | 0.98718200  | -0.33112000 |
| H                    | -0.29940800 | 1.80487700  | -0.94325200 | H                    | -1.41013000 | 0.90618700  | -1.24049800 |
| C                    | -0.01182000 | 1.53800700  | 1.19225200  | C                    | -1.13566600 | 1.53102600  | 0.82670200  |
| C                    | -1.85369300 | 0.52994400  | -0.21895000 | C                    | -2.64321800 | -0.36012700 | 0.02249100  |
| H                    | 0.56462200  | 2.45874600  | 1.30313200  | H                    | -0.85218700 | 2.55362000  | 0.57296300  |
| H                    | -0.63734300 | 1.40953700  | 2.07574700  | H                    | -1.73973800 | 1.55260200  | 1.73482500  |
| C                    | 0.92150300  | 0.39725900  | 1.04794900  | C                    | 0.09113100  | 0.72992900  | 1.04092800  |
| O                    | -3.08842700 | 0.68061800  | -0.03172700 | O                    | -3.77263300 | -0.35897400 | 0.51206400  |
| C                    | 0.79847200  | -0.86777900 | 1.69873800  | C                    | 0.22870000  | -0.36081900 | 1.94696300  |
| C                    | 2.07274200  | 0.31091100  | 0.23081900  | C                    | 1.32923200  | 0.82793700  | 0.34784700  |
| H                    | 0.04456600  | -1.18866900 | 2.39871400  | H                    | -0.49375200 | -0.74446400 | 2.64856900  |
| N                    | 1.78756500  | -1.65833200 | 1.31733400  | N                    | 1.43892500  | -0.88784000 | 1.82496600  |
| C                    | 2.61603000  | -0.98544000 | 0.40259800  | C                    | 2.16563700  | -0.20373600 | 0.83909000  |
| C                    | 2.69798900  | 1.21148800  | -0.64403100 | C                    | 1.79901200  | 1.67144600  | -0.66655000 |
| H                    | 1.92892000  | -2.60871000 | 1.63747100  | H                    | 1.78561100  | -1.67401100 | 2.36071300  |
| C                    | 3.74107400  | -1.41167000 | -0.24813600 | C                    | 3.43257100  | -0.42219800 | 0.36551100  |
| C                    | 3.84267300  | 0.79197500  | -1.31373100 | C                    | 3.08586000  | 1.46188500  | -1.15572500 |
| H                    | 2.29860400  | 2.20598800  | -0.78850000 | H                    | 1.17639400  | 2.46531900  | -1.05606700 |
| H                    | 4.14447900  | -2.40452400 | -0.10650800 | H                    | 4.05742700  | -1.21643800 | 0.74943200  |
| C                    | 4.35441900  | -0.48925800 | -1.12030900 | C                    | 3.88571100  | 0.43937400  | -0.65173600 |
| H                    | 4.34366000  | 1.46698000  | -1.99321300 | H                    | 3.47187900  | 2.10125700  | -1.93720400 |
| H                    | 5.24708400  | -0.79193100 | -1.65046300 | H                    | 4.88240200  | 0.29770200  | -1.04656000 |
| O                    | -1.35890500 | -0.59274700 | -0.52179500 | O                    | -1.94379500 | -1.41495300 | -0.18286000 |
| Fe                   | -3.32949900 | -1.47500700 | -0.52111400 | Fe                   | -0.18900600 | -1.69278800 | -1.06114200 |

  

|                     |             |             |             |                     |             |             |             |                      |             |             |             |
|---------------------|-------------|-------------|-------------|---------------------|-------------|-------------|-------------|----------------------|-------------|-------------|-------------|
| Molecule: Hg-TRP-01 |             |             |             | Molecule: Hg-TRP-02 |             |             |             | Molecule: Hg-TRP-031 |             |             |             |
| N                   | -0.04762500 | 3.44748500  | 0.10622400  | N                   | 3.68326900  | 0.57146200  | 1.30957100  | N                    | -2.01134700 | 3.18854700  | 0.14120000  |
| H                   | -0.54234500 | 3.74578600  | -0.73735800 | H                   | 4.13483500  | -0.34580700 | 1.32119100  | H                    | -2.59378400 | 3.45776600  | -0.65387000 |
| H                   | 0.63980200  | 4.16622300  | 0.34796400  | H                   | 3.67969200  | 0.94423700  | 2.26177400  | H                    | -1.20346000 | 3.81362200  | 0.18853500  |
| H                   | -0.72943100 | 3.38272500  | 0.86705000  | H                   | 4.23815100  | 1.19022500  | 0.70981100  | H                    | -2.57582000 | 3.31216600  | 0.98555300  |
| C                   | 0.63611000  | 2.13235700  | -0.09724400 | C                   | 2.29040200  | 0.47848600  | 0.76503200  | C                    | -1.56784300 | 1.76755600  | 0.01339400  |
| H                   | 1.29850800  | 2.24550100  | -0.95002000 | H                   | 1.79063900  | -0.30503400 | 1.32492200  | H                    | -1.01518400 | 1.70322000  | -0.92002300 |
| C                   | 1.42640200  | 1.78502500  | 1.17745300  | C                   | 1.61646300  | 1.84027700  | 1.00051900  | C                    | -0.66659100 | 1.41488200  | 1.21678300  |
| C                   | -0.38571200 | 1.04342400  | -0.41238400 | C                   | 2.42261000  | 0.08307500  | -0.71750000 | C                    | -2.82149000 | 0.88348000  | -0.08051800 |
| H                   | 2.14590700  | 2.59363300  | 1.33344300  | H                   | 1.54904700  | 1.96689400  | 2.08502800  | H                    | -0.22621900 | 2.34392300  | 1.58834000  |
| H                   | 0.73367700  | 1.78792600  | 2.02147200  | H                   | 2.28673800  | 2.61671300  | 0.62645600  | H                    | -1.27696900 | 1.00681400  | 2.02205900  |
| C                   | 2.11652100  | 0.46767300  | 1.08765600  | C                   | 0.27635700  | 2.03852300  | 0.36767300  | C                    | 0.48482800  | 0.48467900  | 0.93349600  |
| O                   | -1.51151500 | 1.18045600  | 0.20354900  | O                   | 3.30145900  | 0.64512500  | -1.37949200 | O                    | -3.92049800 | 1.40045300  | 0.15880500  |
| C                   | 1.74033700  | -0.68953100 | 1.71769900  | C                   | -0.01550400 | 3.04014300  | -0.53357300 | C                    | 0.90194200  | -0.53966200 | 1.82912000  |
| C                   | 3.24435400  | 0.13629000  | 0.26023600  | C                   | -0.93007400 | 1.29479600  | 0.52633200  | C                    | 1.68972300  | 0.84671100  | 0.19153500  |
| H                   | 0.93349800  | -0.86094000 | 2.41124100  | H                   | 0.62885800  | 3.81490600  | -0.91544000 | H                    | 0.32997500  | -1.00664100 | 2.61398000  |
| N                   | 2.56894200  | -1.72012600 | 1.33986100  | N                   | -1.31684300 | 2.95675400  | -0.93644800 | N                    | 2.20312400  | -0.80182800 | 1.65018500  |
| C                   | 3.50053300  | -1.24818900 | 0.44598500  | C                   | -1.91089500 | 1.88817100  | -0.31525600 | C                    | 2.72368000  | 0.00484600  | 0.64634500  |
| C                   | 4.05419100  | 0.86609500  | -0.61968100 | C                   | -1.30273000 | 0.13485000  | 1.27049200  | C                    | 1.96588200  | 1.81056200  | -0.77847800 |
| H                   | 2.51136600  | -2.66638800 | 1.67907000  | H                   | -1.76831200 | 3.58375900  | -1.58405300 | H                    | 2.70600400  | -1.54513200 | 2.11450900  |
| C                   | 4.53472600  | -1.90592600 | -0.21683000 | C                   | -3.20485500 | 1.40041500  | -0.41672900 | C                    | 4.00995900  | 0.05316600  | 0.12665100  |
| C                   | 5.08254200  | 0.21416300  | -1.27975400 | C                   | -2.62785900 | -0.35519500 | 1.14705200  | C                    | 3.25155600  | 1.87808500  | -1.29244400 |
| H                   | 3.87723500  | 1.92210600  | -0.78186700 | H                   | -0.69092500 | -0.19603700 | 2.10376800  | H                    | 1.19374700  | 2.48415700  | -1.12536000 |
| H                   | 4.71471700  | -2.96220800 | -0.06302900 | H                   | -3.92860000 | 1.89058900  | -0.10549700 | H                    | 4.78378200  | -0.61505800 | 0.47935400  |
| C                   | 5.31953100  | -1.15815200 | -1.08034200 | C                   | -3.55086000 | 0.26505400  | 0.31021000  | C                    | 4.25679300  | 1.00300100  | -0.85380700 |
| H                   | 5.71635100  | 0.76562400  | -1.96239000 | H                   | -2.92130500 | -1.20769900 | 1.74370200  | H                    | 3.48598800  | 2.61508100  | -2.04890700 |
| H                   | 6.12983400  | -1.63936300 | -1.61278800 | H                   | -4.55345000 | -0.13161600 | 0.23404100  | H                    | 5.24730200  | 1.07583500  | -1.28291100 |
| O                   | -0.07488600 | 0.11538300  | -1.15163800 | O                   | 1.64770100  | -0.82336200 | -1.19422200 | O                    | -2.65762300 | -0.34237400 | -0.39948500 |
| Hg                  | -2.75005400 | -0.55997800 | -0.13734300 | Hg                  | -0.23727500 | -1.37180400 | -0.14129900 | Hg                   | -0.53679300 | -1.26826600 | -0.32860000 |



Molecule:Mn-TRP-02

|    |             |             |             |
|----|-------------|-------------|-------------|
| N  | 3.30425600  | 0.56765700  | 1.63471500  |
| H  | 3.71182700  | -0.29280700 | 2.00625800  |
| H  | 3.08890500  | 1.18862300  | 2.41776400  |
| H  | 4.00587900  | 1.01004600  | 1.03300600  |
| C  | 2.08028400  | 0.27985700  | 0.82196400  |
| H  | 1.44583600  | -0.36803900 | 1.41967400  |
| C  | 1.37740000  | 1.61484500  | 0.51973300  |
| C  | 2.52296100  | -0.43187800 | -0.46298300 |
| H  | 1.21077800  | 2.12033700  | 1.47514200  |
| H  | 2.05661700  | 2.23587000  | -0.06742000 |
| C  | 0.08686900  | 1.43289600  | -0.20113100 |
| O  | 3.61627600  | -0.09346600 | -0.95039400 |
| C  | -0.15006300 | 1.63381000  | -1.53532100 |
| C  | -1.12812300 | 0.90011600  | 0.35469400  |
| H  | 0.50921800  | 2.01289000  | -2.29862500 |
| N  | -1.43620300 | 1.25311400  | -1.84616300 |
| C  | -2.05786200 | 0.78286600  | -0.71452500 |
| C  | -1.48942200 | 0.44015100  | 1.62989200  |
| H  | -1.85327400 | 1.31248200  | -2.76081600 |
| C  | -3.32668200 | 0.23545900  | -0.53322300 |
| C  | -2.74870100 | -0.10932900 | 1.80789800  |
| H  | -0.79184200 | 0.50409400  | 2.45525900  |
| H  | -4.02136800 | 0.14916800  | -1.35867100 |
| C  | -3.65601700 | -0.21017600 | 0.73707000  |
| H  | -3.04106300 | -0.47558400 | 2.78348400  |
| H  | -4.62993700 | -0.65025600 | 0.90803800  |
| O  | 1.73732200  | -1.29557200 | -0.95781900 |
| Mn | -0.26642400 | -1.99166500 | -0.23246600 |

Molecule:Ni-TRP-01

|    |             |             |             |
|----|-------------|-------------|-------------|
| N  | -2.01021700 | 2.90148300  | -0.04733600 |
| H  | -2.56980900 | 2.99858300  | -0.89862900 |
| H  | -1.51869500 | 3.78461100  | 0.11537700  |
| H  | -2.64544300 | 2.74039600  | 0.74020200  |
| C  | -1.01958000 | 1.78799200  | -0.16585900 |
| H  | -0.42697100 | 1.96659700  | -1.05853500 |
| C  | -0.12901100 | 1.76057100  | 1.09319700  |
| C  | -1.74856600 | 0.48233300  | -0.31638200 |
| H  | 0.40361600  | 2.71415100  | 1.11827000  |
| H  | -0.77927700 | 1.71389400  | 1.96852200  |
| C  | 0.81809400  | 0.61072200  | 1.09699500  |
| O  | -2.83453100 | 0.25427300  | 0.30377300  |
| C  | 0.72415100  | -0.51344100 | 1.87571700  |
| C  | 1.95430000  | 0.42219100  | 0.23745000  |
| H  | 0.00443900  | -0.75936000 | 2.63904800  |
| N  | 1.73685000  | -1.38687000 | 1.55979700  |
| C  | 2.50996600  | -0.84383500 | 0.56034300  |
| C  | 2.55015900  | 1.19169400  | -0.76977100 |
| H  | 1.90066900  | -2.27187900 | 2.01124400  |
| C  | 3.63695100  | -1.34495700 | -0.08783700 |
| C  | 3.66948400  | 0.69482100  | -1.41654600 |
| H  | 2.14084400  | 2.15780500  | -1.03776800 |
| H  | 4.04890200  | -2.31132400 | 0.17321700  |
| C  | 4.20706800  | -0.56044100 | -1.07815100 |
| H  | 4.14071800  | 1.27823200  | -2.19717200 |
| H  | 5.08261800  | -0.92080800 | -1.60271400 |
| O  | -1.26482400 | -0.45032100 | -1.02824300 |
| Ni | -2.78968700 | -1.58038200 | -0.46205200 |

Molecule:Mn-TRP-03

|    |             |             |             |
|----|-------------|-------------|-------------|
| N  | -3.05429400 | 1.91758600  | -0.69227500 |
| H  | -3.47642600 | 1.70026900  | -1.59671600 |
| H  | -2.67556400 | 2.86606800  | -0.72726000 |
| H  | -3.79525600 | 1.86866800  | 0.01416800  |
| C  | -1.99323500 | 0.91942900  | -0.33681800 |
| H  | -1.34935400 | 0.81395100  | -1.20452700 |
| C  | -1.20620400 | 1.45812200  | 0.87266200  |
| C  | -2.70752000 | -0.40200200 | -0.01119000 |
| H  | -0.97137800 | 2.50557500  | 0.66695100  |
| H  | -1.85604000 | 1.43427300  | 1.74927600  |
| C  | 0.05434600  | 0.70594000  | 1.12212200  |
| O  | -3.83687900 | -0.32109000 | 0.50372100  |
| C  | 0.26002400  | -0.30267900 | 2.02709300  |
| C  | 1.27619900  | 0.84057500  | 0.37177400  |
| H  | -0.41198200 | -0.71073200 | 2.76387900  |
| N  | 1.53385700  | -0.80530100 | 1.88763400  |
| C  | 2.17833900  | -0.13755900 | 0.87327900  |
| C  | 1.67035300  | 1.64063500  | -0.70891700 |
| H  | 1.92861100  | -1.54741800 | 2.44196500  |
| C  | 3.45110400  | -0.31538800 | 0.33465000  |
| C  | 2.93445700  | 1.46299800  | -1.24603600 |
| H  | 0.99418000  | 2.37926800  | -1.12110800 |
| H  | 4.12567700  | -1.06432300 | 0.72911500  |
| C  | 3.81526800  | 0.49576500  | -0.72845800 |
| H  | 3.25230800  | 2.07201400  | -2.08258600 |
| H  | 4.79533800  | 0.37947100  | -1.17285300 |
| O  | -2.09700900 | -1.48548400 | -0.26072500 |
| Mn | -0.03378900 | -1.76902000 | -1.04771100 |

Molecule:Ni-TRP-02

|    |             |             |             |
|----|-------------|-------------|-------------|
| N  | 3.65636200  | 0.07272600  | 1.16989800  |
| H  | 4.09588800  | -0.85065300 | 1.16803000  |
| H  | 3.72167700  | 0.46118500  | 2.11368200  |
| H  | 4.18185300  | 0.67211200  | 0.52615500  |
| C  | 2.23205600  | -0.01115100 | 0.72816300  |
| H  | 1.76307400  | -0.78950400 | 1.32292800  |
| C  | 1.57914800  | 1.36261200  | 0.98139700  |
| C  | 2.22117400  | -0.41973700 | -0.74552300 |
| H  | 1.56675700  | 1.50828900  | 2.06460800  |
| H  | 2.22960500  | 2.12872500  | 0.55469400  |
| C  | 0.21005600  | 1.53026100  | 0.40698100  |
| O  | 3.13883700  | -0.06503700 | -1.47666500 |
| C  | -0.16826600 | 2.52318000  | -0.47492000 |
| C  | -0.93559600 | 0.70594600  | 0.58450800  |
| H  | 0.41778000  | 3.33741700  | -0.86864500 |
| N  | -1.47210100 | 2.36393000  | -0.84272800 |
| C  | -1.97868100 | 1.24530800  | -0.23068500 |
| C  | -1.17419500 | -0.51839600 | 1.26939800  |
| H  | -1.97233100 | 2.95519500  | -1.48875200 |
| C  | -3.21551900 | 0.64089700  | -0.34361600 |
| C  | -2.44516300 | -1.12014900 | -1.15015500 |
| H  | -0.47250200 | -0.88085800 | 2.01132800  |
| H  | -3.98851200 | 1.06916200  | -0.96776800 |
| C  | -3.43555800 | -0.55449500 | 0.34717800  |
| H  | -2.65015300 | -2.02718400 | 1.70175300  |
| H  | -4.39414700 | -1.04620100 | 0.26126600  |
| O  | 1.22442300  | -1.13843800 | -1.15124000 |
| Ni | -0.42970100 | -1.65257600 | -0.41801600 |

Molecule:Mn-TRP-015

|    |             |             |             |
|----|-------------|-------------|-------------|
| N  | -1.94181000 | 2.89109800  | -0.40299200 |
| H  | -2.56841300 | 2.82895800  | -1.20822100 |
| H  | -1.43545700 | 3.77832900  | -0.45396000 |
| H  | -2.51806100 | 2.88726400  | 0.44329500  |
| C  | -0.98513700 | 1.73881400  | -0.36903600 |
| H  | -0.47613800 | 1.71998700  | -1.32770000 |
| C  | 0.00357300  | 1.97073100  | 0.78022100  |
| C  | -1.78898700 | 0.45571700  | -0.19326000 |
| H  | 0.53347000  | 2.90270500  | 0.56171900  |
| H  | -0.56855500 | 2.12497300  | 1.69766300  |
| C  | 0.96495200  | 0.84838600  | 0.97840300  |
| O  | -2.80590500 | 0.48309600  | 0.54215300  |
| C  | 1.04309600  | 0.04820000  | 2.08755100  |
| C  | 1.97747200  | 0.38564300  | 0.06730100  |
| H  | 0.45915500  | 0.07564300  | 2.99290600  |
| N  | 2.04416800  | -0.88188200 | 1.92796800  |
| C  | 2.63883400  | -0.69969700 | 0.70253600  |
| C  | 2.38774100  | 0.77225600  | -1.21575000 |
| H  | 2.32412300  | -1.55763600 | 2.61991700  |
| C  | 3.68872100  | -1.38609200 | 0.09616500  |
| C  | 3.42775600  | 0.08768100  | -1.82246300 |
| H  | 1.89638800  | 1.59074800  | -1.72676800 |
| H  | 4.18420800  | -2.20664500 | 0.59905300  |
| C  | 4.07311700  | -0.97920600 | -1.17149500 |
| H  | 3.75200800  | 0.37422300  | -2.81475600 |
| H  | 4.88413600  | -1.49350400 | -1.67092800 |
| O  | -1.38970400 | -0.57323600 | -0.80546800 |
| Mn | -3.28821300 | -1.83292100 | -0.31686300 |

Molecule:Ni-TRP-03

|    |             |             |             |
|----|-------------|-------------|-------------|
| N  | -2.90183300 | 2.10216900  | 0.78674300  |
| H  | -3.54893900 | 2.44998300  | 0.07652300  |
| H  | -2.35601200 | 2.88508600  | 1.15345000  |
| H  | -3.46307200 | 1.71101100  | 1.54809000  |
| C  | -1.99849000 | 1.06186200  | 0.21108900  |
| H  | -1.44214000 | 1.54504900  | -0.58973000 |
| C  | -1.05525000 | 0.56266200  | 1.31118900  |
| C  | -2.86873800 | -0.03375600 | -0.40694600 |
| H  | -0.72867200 | 1.43395900  | 1.88482900  |
| H  | -1.61127600 | -0.08340300 | 1.99161900  |
| C  | 0.18791700  | -0.15575300 | 0.84417700  |
| O  | -4.09142500 | 0.06765000  | -0.38192300 |
| C  | 0.71760800  | -1.25756300 | 1.56207400  |
| C  | 1.35744700  | 0.47153700  | 0.21167800  |
| H  | 0.19189700  | -1.94538400 | 2.20502900  |
| N  | 2.03197600  | -1.35851400 | 1.35664400  |
| C  | 2.47491600  | -0.33028800 | 0.52716700  |
| C  | 1.54011800  | 1.60923000  | -0.57697400 |
| H  | 2.60966700  | -2.11491100 | 1.69846300  |
| C  | 3.75147700  | -0.06230100 | 0.05959800  |
| C  | 2.81785300  | 1.89759800  | -1.03456200 |
| H  | 0.70863400  | 2.25375800  | -0.82532200 |
| H  | 4.58691300  | -0.70282300 | 0.30694200  |
| C  | 3.90607000  | 1.06933400  | -0.72955500 |
| H  | 2.97823000  | 2.77809800  | -1.64217300 |
| H  | 4.88686600  | 1.31898800  | -1.11142700 |
| O  | -2.24369900 | -1.02215300 | -0.95062700 |
| Ni | -0.39384600 | -1.36051300 | -0.81832900 |

## Molecule:Zn-TRP-03

|    |             |             |             |
|----|-------------|-------------|-------------|
| N  | -2.84593000 | 2.26101800  | 0.40886400  |
| H  | -3.46674400 | 2.48012900  | -0.37244600 |
| H  | -2.28192000 | 3.08568100  | 0.62590800  |
| H  | -3.43761800 | 2.04458000  | 1.21502900  |
| C  | -1.96845500 | 1.09728500  | 0.07791400  |
| H  | -1.37984100 | 1.38992000  | -0.78882900 |
| C  | -1.05581400 | 0.81419000  | 1.28969700  |
| C  | -2.87529600 | -0.07905400 | -0.30751000 |
| H  | -0.79258500 | 1.78594400  | 1.71758900  |
| H  | -1.63115300 | 0.27948400  | 2.04679100  |
| C  | 0.22951700  | 0.08092900  | 1.02297000  |
| O  | -4.09080500 | 0.02500400  | -0.13206200 |
| C  | 0.69901900  | -0.99230200 | 1.77760800  |
| C  | 1.38238800  | 0.57177500  | 0.28239000  |
| H  | 0.16877200  | -1.59334800 | 2.49792300  |
| N  | 2.01935600  | -1.19531500 | 1.53157800  |
| C  | 2.47002300  | -0.27564300 | 0.60737200  |
| C  | 1.59037800  | 1.63357900  | -0.60678800 |
| H  | 2.56076500  | -1.96245700 | 1.90012700  |
| C  | 3.73148000  | -0.12204800 | 0.03937000  |
| C  | 2.84821400  | 1.80007000  | -1.16019600 |
| H  | 0.78222800  | 2.30659800  | -0.86060100 |
| H  | 4.54272600  | -0.79263000 | 0.28999600  |
| C  | 3.90474800  | 0.92647700  | -0.84850600 |
| H  | 3.02408400  | 2.61505600  | -1.85017300 |
| H  | 4.87249400  | 1.07931400  | -1.30793900 |
| O  | -2.31253100 | -1.12284200 | -0.80439400 |
| Zn | -0.38952400 | -1.47090100 | -0.80835800 |

## Molecule:Zn-TRP-011

|    |             |             |             |
|----|-------------|-------------|-------------|
| N  | -1.70315500 | 3.22393600  | -0.21179300 |
| H  | -2.18186400 | 3.38333800  | -1.10040600 |
| H  | -1.08256400 | 4.01618800  | -0.02976200 |
| H  | -2.41562600 | 3.18250400  | 0.52318400  |
| C  | -0.93734000 | 1.93986700  | -0.23468000 |
| H  | -0.33293100 | 1.93499200  | -1.13659700 |
| C  | -0.05106000 | 1.87256500  | 1.02381200  |
| C  | -1.93687200 | 0.78947300  | -0.24526200 |
| H  | 0.55581600  | 2.78169300  | 1.03442300  |
| H  | -0.69963200 | 1.89682900  | 1.90187500  |
| C  | 0.82245200  | 0.66663700  | 1.05859000  |
| O  | -3.03968600 | 0.93999800  | 0.28864400  |
| C  | 0.65049900  | -0.44927200 | 1.83443500  |
| C  | 1.97211700  | 0.41839400  | 0.23278400  |
| H  | -0.10267900 | -0.65941900 | 2.57588700  |
| N  | 1.62434400  | -1.37745000 | 1.54401700  |
| C  | 2.45301600  | -0.87485000 | 0.56895900  |
| C  | 2.63891300  | 1.15912600  | -0.75172200 |
| H  | 1.73128800  | -2.26829100 | 2.00107800  |
| C  | 3.57382900  | -1.43029800 | -0.04513500 |
| C  | 3.75221000  | 0.60831100  | -1.36433200 |
| H  | 2.28913000  | 2.14631000  | -1.02730000 |
| H  | 3.92930300  | -2.41644700 | 0.22495200  |
| C  | 4.21453900  | -0.67331900 | -1.01370800 |
| H  | 4.27797900  | 1.16987400  | -2.12600200 |
| H  | 5.08760800  | -1.07565200 | -1.51120600 |
| O  | -1.49621300 | -0.29167600 | -0.77853100 |
| Zn | -2.57102600 | -1.87879000 | -0.43730200 |

## Molecule:Zn-TRP-021

|    |             |             |             |
|----|-------------|-------------|-------------|
| N  | 3.17798500  | -1.40390200 | -1.31181800 |
| H  | 3.64422000  | -0.78021100 | -1.97353900 |
| H  | 2.88172100  | -2.24551900 | -1.81082700 |
| H  | 3.85924700  | -1.65995500 | -0.59024300 |
| C  | 2.01166000  | -0.72927100 | -0.66444700 |
| H  | 1.41296500  | -0.28200400 | -1.45395500 |
| C  | 1.20269400  | -1.78816400 | 0.10335800  |
| C  | 2.56115700  | 0.35140700  | 0.27217400  |
| H  | 0.98813500  | -2.59787800 | -0.59890000 |
| H  | 1.83477000  | -2.19681000 | 0.89418700  |
| C  | -0.06227300 | -1.25284100 | 0.67927600  |
| O  | 3.65602800  | 0.15808800  | 0.80840200  |
| C  | -0.29113900 | -0.93077100 | 1.99114700  |
| C  | -1.26436600 | -0.92166700 | -0.04010700 |
| H  | 0.36275500  | -1.02457200 | 2.84247300  |
| N  | -1.55808300 | -0.41507700 | 2.13461900  |
| C  | -2.17882100 | -0.38673100 | 0.90904900  |
| C  | -1.64525900 | -0.99417500 | -1.38800800 |
| H  | -1.96449800 | -0.10834200 | 3.00351400  |
| C  | -3.45107500 | 0.04997500  | 0.54492500  |
| C  | -2.90956300 | -0.55984600 | -1.74935700 |
| H  | -0.96321700 | -1.38914500 | -2.13050900 |
| H  | -4.13696800 | 0.44901200  | 1.28110400  |
| C  | -3.80251800 | -0.04432100 | -0.79219100 |
| H  | -3.21988200 | -0.61472400 | -2.78483400 |
| H  | -4.78340000 | 0.28752100  | -1.10725600 |
| O  | 1.84149300  | 1.39297400  | 0.48135900  |
| Zn | 0.12472300  | 1.85751400  | -0.36146100 |

## Molecule: Cd-TYR-01

|    |             |             |             |
|----|-------------|-------------|-------------|
| N  | -0.97551800 | 3.37025600  | -0.08000100 |
| H  | -1.35190500 | 3.33872500  | 0.87105100  |
| H  | -1.76578100 | 3.43128800  | -0.72595700 |
| H  | -0.40970800 | 4.21672900  | -0.18071600 |
| C  | -0.14405400 | 2.15550000  | -0.35337100 |
| H  | 0.18055000  | 2.22160500  | -1.38827400 |
| C  | 1.06220700  | 2.16478900  | 0.59532400  |
| C  | -1.01546300 | 0.91994500  | -0.19106800 |
| H  | 1.57844300  | 3.11529100  | 0.43876100  |
| H  | 0.69438400  | 2.15144500  | 1.62267800  |
| C  | 2.00570600  | 1.01601700  | 0.36953300  |
| O  | -2.02587000 | 0.98257700  | 0.56067500  |
| C  | 2.11738600  | -0.00807300 | 1.30574900  |
| C  | 2.78138800  | 0.94236500  | -0.78859600 |
| H  | 1.52464800  | 0.03044200  | 2.21145800  |
| C  | 2.97937800  | -1.07916700 | 1.10152000  |
| C  | 3.64113100  | -0.12215000 | -1.01094400 |
| H  | 2.71219000  | 1.72834100  | -1.53109300 |
| H  | 3.06404800  | -1.86678200 | 1.84050100  |
| C  | 3.73911200  | -1.13649500 | -0.06141300 |
| H  | 4.24006500  | -0.17442500 | -1.91075800 |
| O  | 4.60715600  | -2.17203800 | -0.31805900 |
| H  | 4.57496200  | -2.80619500 | 0.41184000  |
| O  | -0.69267300 | -0.11866800 | -0.82241800 |
| Cd | -2.63172800 | -1.20061700 | -0.04711400 |

## Molecule: Cd-TYR-02

|    |             |             |             |
|----|-------------|-------------|-------------|
| N  | 3.57447600  | -0.92590800 | -0.89206800 |
| H  | 4.05486800  | -1.28730300 | -0.06189100 |
| H  | 4.07140600  | -0.08657200 | -1.19754100 |
| H  | 3.62215400  | -1.62094100 | -1.63963100 |
| C  | 2.15572000  | -0.61119000 | -0.53191000 |
| H  | 1.73228600  | -0.03798100 | -1.35292600 |
| C  | 1.39449000  | -1.93666800 | -0.35107400 |
| C  | 2.20131400  | 0.22315600  | 0.75883300  |
| H  | 1.55270900  | -2.52823600 | -1.25474000 |
| H  | 1.83428900  | -2.47675700 | 0.48928400  |
| C  | -0.07331400 | -1.70463500 | -0.13445500 |
| O  | 3.08596100  | -0.05078600 | 1.57903800  |
| C  | -0.58678000 | -1.50188100 | 1.14565300  |
| C  | -0.93131400 | -1.54451600 | -1.22564500 |
| H  | 0.06119100  | -1.62129200 | 2.00507700  |
| C  | -1.90703100 | -1.11724900 | 1.33825100  |
| C  | -2.25362900 | -1.15455000 | -1.05083700 |
| H  | -0.55445400 | -1.70352200 | -2.22849100 |
| H  | -2.29568500 | -0.95657600 | 2.33654000  |
| C  | -2.73630900 | -0.92597800 | 0.23632400  |
| H  | -2.91290900 | -1.02577100 | -1.89893400 |
| O  | -4.04502400 | -0.52914200 | 0.36521800  |
| H  | -4.25706400 | -0.40671500 | 1.30130000  |
| O  | 1.33380300  | 1.14633100  | 0.93541400  |
| Cd | -0.38556100 | 1.61130900  | -0.30003700 |

## Molecule: Cu-TYR-01

|    |             |             |             |
|----|-------------|-------------|-------------|
| N  | -2.21322700 | 2.74291200  | -0.04726000 |
| H  | -2.59577400 | 2.56068500  | 0.88496500  |
| H  | -2.97062400 | 2.64642300  | -0.72809800 |
| H  | -1.87866200 | 3.70975100  | -0.07269900 |
| C  | -1.08611800 | 1.80737800  | -0.35044800 |
| H  | -0.75665900 | 2.00938900  | -1.36627900 |
| C  | 0.05799800  | 2.05316200  | 0.65184200  |
| C  | -1.58728800 | 0.38941200  | -0.27116200 |
| H  | 0.35336300  | 3.09770600  | 0.53966800  |
| H  | -0.33720300 | 1.91918100  | 1.66024100  |
| C  | 1.23388900  | 1.14359500  | 0.42713000  |
| O  | -2.51674100 | 0.05928300  | 0.52026400  |
| C  | 1.40066300  | -0.00701800 | 1.19469000  |
| C  | 2.16080600  | 1.40907800  | -0.58118800 |
| H  | 0.68853500  | -0.23235800 | 1.97914400  |
| C  | 2.46137200  | -0.87436100 | 0.96815500  |
| C  | 3.22550200  | 0.55338000  | -0.82039500 |
| H  | 2.04906300  | 2.29912500  | -1.18842500 |
| H  | 2.58585800  | -1.76599800 | 1.57085400  |
| C  | 3.37438000  | -0.59245800 | -0.04322300 |
| H  | 3.94445200  | 0.76496300  | -1.60098600 |
| O  | 4.44352300  | -1.41288300 | -0.31285400 |
| H  | 4.43955300  | -2.16021300 | 0.30139000  |
| O  | -1.04365400 | -0.51584900 | -0.97086600 |
| Cu | -2.22557100 | -1.87539600 | -0.08943800 |

## Molecule: Cu-TYR-02

|    |             |             |             |
|----|-------------|-------------|-------------|
| N  | -3.31444800 | 1.71221000  | -0.13017400 |
| H  | -3.71225900 | 1.66298300  | 0.81137900  |
| H  | -4.03692500 | 1.39650800  | -0.78067700 |
| H  | -3.08102000 | 2.68651700  | -0.33431000 |
| C  | -2.10057000 | 0.84898500  | -0.23930000 |
| H  | -1.71930700 | 0.98420900  | -1.25039100 |
| C  | -1.06054400 | 1.29094200  | 0.79907100  |
| C  | -2.54259200 | -0.60784200 | -0.07361400 |
| H  | -1.08712700 | 2.38141300  | 0.85566900  |
| H  | -1.33812400 | 0.90398700  | 1.77902400  |
| C  | 0.35061100  | 0.88675500  | 0.46178800  |
| O  | -3.73652900 | -0.86241100 | 0.07250900  |
| C  | 1.10011700  | 0.06260300  | 1.33174100  |
| C  | 1.01737900  | 1.46114000  | -0.64787200 |
| H  | 0.62471500  | -0.33821000 | 2.21741600  |
| C  | 2.44328400  | -0.20753500 | 1.08690000  |
| C  | 2.34671500  | 1.20881900  | -0.88449600 |
| H  | 0.46929000  | 2.11751200  | -1.31054300 |
| H  | 3.00444600  | -0.84822600 | 1.75420000  |
| C  | 3.06877500  | 0.36761300  | -0.01811800 |
| H  | 2.85643200  | 1.65116100  | -1.72930900 |
| O  | 4.36864700  | 0.15534000  | -0.30651300 |
| H  | 4.77493900  | -0.43064100 | 0.35117400  |
| O  | -1.62865700 | -1.51284600 | -0.09944300 |
| Cu | 0.23032200  | -1.31938700 | -0.33384200 |

## Molecule: Fe-TYR-02

|    |             |             |             |
|----|-------------|-------------|-------------|
| N  | -3.47554200 | 1.06500600  | -0.69444700 |
| H  | -3.95226800 | 1.17980800  | 0.20512800  |
| H  | -4.01203000 | 0.38937300  | -1.24415500 |
| H  | -3.47426800 | 1.95970000  | -1.19032500 |
| C  | -2.08096900 | 0.57625200  | -0.46944100 |
| H  | -1.67204400 | 0.30974400  | -1.44017800 |
| C  | -1.26474100 | 1.72177300  | 0.16964700  |
| C  | -2.17598800 | -0.66101200 | 0.43379400  |
| H  | -1.41783100 | 2.60824800  | -0.44966900 |
| H  | -1.65514700 | 1.91735900  | 1.16860400  |
| C  | 0.18909600  | 1.39177000  | 0.22119100  |
| O  | -3.10693100 | -0.73693000 | 1.23000700  |
| C  | 0.76795500  | 0.86452300  | 1.38896200  |
| C  | 0.97720300  | 1.49130200  | -0.95390400 |
| H  | 0.17659300  | 0.79763700  | 2.29176500  |
| C  | 2.05343200  | 0.37695500  | 1.37208500  |
| C  | 2.26824100  | 1.03194400  | -0.98338100 |
| H  | 0.53687200  | 1.92298900  | -1.84280600 |
| H  | 2.50271800  | -0.06017500 | 2.25428000  |
| C  | 2.81450100  | 0.45073900  | 0.18061600  |
| H  | 2.87657100  | 1.09862100  | -1.87408600 |
| O  | 4.06143600  | -0.00506700 | 0.11411800  |
| H  | 4.34579700  | -0.38630100 | 0.96189900  |
| O  | -1.26854400 | -1.56639600 | 0.31165900  |
| Fe | 0.43437600  | -1.69963000 | -0.59165500 |

## Molecule: Fe-TYR-011

|    |             |             |             |
|----|-------------|-------------|-------------|
| N  | -1.92955500 | 2.79304100  | 0.00458100  |
| H  | -2.31003700 | 2.67776500  | 0.94777200  |
| H  | -2.70787900 | 2.72067600  | -0.65469700 |
| H  | -1.52425800 | 3.72969100  | -0.06810300 |
| C  | -0.89888700 | 1.75449900  | -0.28897200 |
| H  | -0.55178300 | 1.94049700  | -1.30400300 |
| C  | 0.25206700  | 1.88372500  | 0.71777800  |
| C  | -1.52175600 | 0.36665400  | -0.25276400 |
| H  | 0.62205000  | 2.91267200  | 0.66275700  |
| H  | -0.12789600 | 1.70802600  | 1.72395600  |
| C  | 1.38528900  | 0.96332100  | 0.42001500  |
| O  | -2.77836400 | 0.27118500  | -0.06541000 |
| C  | 1.77074400  | -0.02408000 | 1.36326900  |
| C  | 2.10973200  | 1.08991500  | -0.79598500 |
| H  | 1.21701900  | -0.10561100 | 2.28790400  |
| C  | 2.80797800  | -0.86742800 | 1.10539300  |
| C  | 3.15121100  | 0.26051800  | -1.07305300 |
| H  | 1.82359200  | 1.85761600  | -1.50180900 |
| H  | 3.11001200  | -1.63655300 | 1.80399500  |
| C  | 3.50732100  | -0.74147400 | -0.12642700 |
| H  | 3.71980700  | 0.33236900  | -1.98926300 |
| O  | 4.50046000  | -1.53607500 | -0.44730300 |
| H  | 4.67711800  | -2.20217100 | 0.24213000  |
| O  | -0.77771100 | -0.61631600 | -0.40840800 |
| Fe | -2.97608200 | -1.79040500 | -0.04728000 |

## Molecule:Hg-TYR-01

|    |             |             |             |
|----|-------------|-------------|-------------|
| N  | 0.18961700  | 3.56779400  | -0.17026400 |
| H  | -0.28211300 | 3.69726400  | 0.72864100  |
| H  | -0.48721200 | 3.77965500  | -0.90707400 |
| H  | 0.96374200  | 4.23276600  | -0.23572500 |
| C  | 0.69783600  | 2.16498900  | -0.29640000 |
| H  | 1.14309700  | 2.07809700  | -1.28375600 |
| C  | 1.74377400  | 1.90359100  | 0.80240700  |
| C  | -0.49491100 | 1.22663000  | -0.18141900 |
| H  | 2.32827300  | 2.82031100  | 0.90524800  |
| H  | 1.22924400  | 1.73493500  | 1.74945900  |
| C  | 2.67359300  | 0.76564500  | 0.48394600  |
| O  | -1.55118500 | 1.65945200  | 0.31642400  |
| C  | 2.52784500  | -0.48861400 | 1.07043800  |
| C  | 3.72372600  | 0.95884500  | -0.41564300 |
| H  | 1.72089900  | -0.66001000 | 1.77182800  |
| C  | 3.40478800  | -1.52636700 | 0.77437000  |
| C  | 4.60671700  | -0.06398900 | -0.72171300 |
| H  | 3.85837000  | 1.92980200  | -0.87736300 |
| H  | 3.28702800  | -2.49842800 | 1.23792900  |
| C  | 4.44659700  | -1.31042400 | -0.12207300 |
| H  | 5.42455400  | 0.09491400  | -1.41238700 |
| O  | 5.35148800  | -2.29312400 | -0.44802600 |
| H  | 5.14651500  | -3.09876900 | 0.04603900  |
| O  | -0.33878400 | 0.03202200  | -0.58622300 |
| Hg | -2.41664600 | -0.70067100 | -0.03939800 |

## Molecule:Mn-TYR-02

|    |             |             |             |
|----|-------------|-------------|-------------|
| N  | 3.47951900  | -0.95067000 | -0.82025700 |
| H  | 4.00694200  | -1.05969600 | 0.05218900  |
| H  | 3.96371500  | -0.25265900 | -1.38802300 |
| H  | 3.46953200  | -1.83706200 | -1.32894200 |
| C  | 2.09287300  | -0.49517200 | -0.48348300 |
| H  | 1.64112900  | -0.13244000 | -1.40285700 |
| C  | 1.29665800  | -1.69155400 | 0.06973000  |
| C  | 2.22244900  | 0.64216600  | 0.54241200  |
| H  | 1.44724400  | -2.53176000 | -0.61146800 |
| H  | 1.70881000  | -1.96753200 | 1.04193000  |
| C  | -0.16751100 | -1.37455100 | 0.17193800  |
| O  | 3.19555500  | 0.59894400  | 1.31658600  |
| C  | -0.71064300 | -0.83938600 | 1.33890200  |
| C  | -0.99023900 | -1.48356200 | -0.95229500 |
| H  | -0.09157500 | -0.74417100 | 2.22186000  |
| C  | -2.02379100 | -0.38813500 | 1.37800100  |
| C  | -2.30578600 | -1.03923800 | -0.93020000 |
| H  | -0.58884100 | -1.90324900 | -1.86654900 |
| H  | -2.43416800 | 0.04131400  | 2.28388800  |
| C  | -2.81538900 | -0.47043200 | 0.23506800  |
| H  | -2.93589000 | -1.11913600 | -1.80590300 |
| O  | -4.11155900 | -0.01477500 | 0.21007000  |
| H  | -4.33993700 | 0.35661700  | 1.07362100  |
| O  | 1.32101500  | 1.53212900  | 0.55345800  |
| Mn | -0.52141600 | 1.74853000  | -0.69557200 |

## Molecule:Ni-TYR-01

|    |             |             |             |
|----|-------------|-------------|-------------|
| N  | -2.21985800 | 2.70584000  | -0.04873800 |
| H  | -2.60192600 | 2.53258800  | 0.88559700  |
| H  | -2.97839000 | 2.60933100  | -0.72869700 |
| H  | -1.88034500 | 3.67098000  | -0.08079900 |
| C  | -1.09540100 | 1.76614100  | -0.34815200 |
| H  | -0.75980500 | 1.96611400  | -1.36230500 |
| C  | 0.04485700  | 2.00275300  | 0.66167600  |
| C  | -1.60281300 | 0.35316800  | -0.27256000 |
| H  | 0.33373900  | 3.05023000  | 0.56233600  |
| H  | -0.35427800 | 1.85428500  | 1.66644800  |
| C  | 1.22778900  | 1.10477700  | 0.42883400  |
| O  | -2.52189700 | 0.02143100  | 0.54138500  |
| C  | 1.38333700  | -0.07293200 | 1.15699000  |
| C  | 2.17927400  | 1.41577700  | -0.54284200 |
| H  | 0.65283000  | -0.33255700 | 1.91352900  |
| C  | 2.45764000  | -0.92240500 | 0.92747200  |
| C  | 3.25844200  | 0.57894600  | -0.78338000 |
| H  | 2.07652000  | 2.32799200  | -1.11787500 |
| H  | 2.57364400  | -1.83461900 | 1.50021600  |
| C  | 3.39668200  | -0.59393700 | -0.04545300 |
| H  | 3.99794600  | 0.82671400  | -1.53346600 |
| O  | 4.48191500  | -1.39290500 | -0.31360900 |
| H  | 4.46857200  | -2.16262000 | 0.27218800  |
| O  | -1.09127900 | -0.55907000 | -0.99054200 |
| Ni | -2.30136600 | -1.84995300 | -0.09390700 |

## Molecule:Hg-TYR-02

|    |             |             |             |
|----|-------------|-------------|-------------|
| N  | -3.23490100 | 2.25427200  | -0.52964200 |
| H  | -3.76421800 | 2.35067000  | 0.34147700  |
| H  | -3.88009300 | 1.90268100  | -1.24015400 |
| H  | -2.89689700 | 3.17410600  | -0.82057300 |
| C  | -2.09211600 | 1.30892200  | -0.33292000 |
| H  | -1.62602900 | 1.17487400  | -1.30534000 |
| C  | -1.09554800 | 1.94347400  | 0.66712700  |
| C  | -2.69256500 | -0.01825700 | 0.15523900  |
| H  | -1.18878700 | 3.02612600  | 0.56334800  |
| H  | -1.39685700 | 1.69091400  | 1.68375300  |
| C  | 0.34899900  | 1.58251200  | 0.44073500  |
| O  | -3.78372700 | 0.01162000  | 0.72829700  |
| C  | 1.00508100  | 0.63538700  | 1.25960000  |
| C  | 1.09204700  | 2.19883000  | -0.56483500 |
| H  | 0.49129400  | 0.23839300  | 2.12719800  |
| C  | 2.37309200  | 0.34591700  | 1.08357600  |
| C  | 2.43550000  | 1.91335300  | -0.74676200 |
| H  | 0.61391000  | 2.92701800  | -1.20760600 |
| H  | 2.87115100  | -0.35046800 | 1.74540100  |
| C  | 3.07934900  | 0.98671600  | 0.07320800  |
| H  | 3.00030200  | 2.40565600  | -1.52743300 |
| O  | 4.40660600  | 0.75403800  | -0.15550300 |
| H  | 4.74560600  | 0.11430100  | 0.48702500  |
| O  | -2.05586000 | -1.11383000 | -0.07589800 |
| Hg | 0.13019700  | -1.21287400 | -0.16655700 |

## Molecule:Mn-TYR-014

|    |             |             |             |
|----|-------------|-------------|-------------|
| N  | -2.16681200 | 2.82011300  | -0.03137100 |
| H  | -2.64352400 | 2.50897600  | 0.81972900  |
| H  | -2.85742200 | 2.85371400  | -0.78407600 |
| H  | -1.80227000 | 3.76376400  | 0.11736500  |
| C  | -1.05645200 | 1.86947100  | -0.35904100 |
| H  | -0.65995800 | 2.15369300  | -1.32915700 |
| C  | 0.02123700  | 1.98263300  | 0.73169100  |
| C  | -1.61941200 | 0.45536100  | -0.41034500 |
| H  | 0.35520700  | 3.02154000  | 0.75487900  |
| H  | -0.44414400 | 1.75680900  | 1.69339300  |
| C  | 1.18684900  | 1.06464500  | 0.48834500  |
| O  | -2.51876000 | 0.15872600  | 0.43067900  |
| C  | 1.22283900  | -0.21131300 | 1.04819900  |
| C  | 2.23716000  | 1.45248900  | -0.34324100 |
| H  | 0.41473200  | -0.53456300 | 1.69327000  |
| C  | 2.27289200  | -1.08145900 | 0.78554500  |
| C  | 3.29455200  | 0.59634200  | -0.61462200 |
| H  | 2.22932700  | 2.44185900  | -0.78436700 |
| H  | 2.29407900  | -2.07201100 | 1.22402800  |
| C  | 3.30898800  | -0.67589700 | -0.05032300 |
| H  | 4.10904100  | 0.90464600  | -1.25702600 |
| O  | 4.37385200  | -1.49497700 | -0.34553500 |
| H  | 4.26592100  | -2.34099500 | 0.11083400  |
| O  | -1.12869200 | -0.35972900 | -1.22369500 |
| Mn | -2.44465700 | -2.13376000 | -0.02352500 |

## Molecule:Ni-TYR-02

|    |             |             |             |
|----|-------------|-------------|-------------|
| N  | -3.49854700 | 1.23048000  | -0.63135000 |
| H  | -3.85618500 | 1.51424100  | 0.28523100  |
| H  | -4.18473400 | 0.59420000  | -1.04266800 |
| H  | -3.41841500 | 2.05841500  | -1.22608300 |
| C  | -2.17287000 | 0.55829300  | -0.48729800 |
| H  | -1.89335000 | 0.21087700  | -1.48037300 |
| C  | -1.15873400 | 1.58432800  | 0.03690100  |
| C  | -2.36276800 | -0.65544800 | 0.43069200  |
| H  | -1.22734100 | 2.46843500  | -0.60281000 |
| H  | -1.44293700 | 1.88237100  | 1.04612000  |
| C  | 0.26983400  | 1.11000800  | 0.04041800  |
| O  | -3.41499600 | -0.79133200 | 1.04503900  |
| C  | 1.04509000  | 1.19238500  | 1.21210300  |
| C  | 0.90241800  | 0.64107100  | -1.13446300 |
| H  | 0.58389500  | 1.55451100  | 2.12065400  |
| C  | 2.37258200  | 0.81788600  | 1.22554400  |
| C  | 2.23747400  | 0.21037600  | -1.11760200 |
| H  | 0.36300000  | 0.64333000  | -2.07420400 |
| H  | 2.95450400  | 0.89082500  | 2.13524100  |
| C  | 2.97935700  | 0.31529300  | 0.06229200  |
| H  | 2.70949100  | -0.14685000 | -2.02160600 |
| O  | 4.26651900  | -0.07564400 | 0.03037800  |
| H  | 4.68165000  | 0.03289300  | 0.89971000  |
| O  | -1.38495700 | -1.49618500 | 0.50211900  |
| Ni | 0.31476500  | -1.28773100 | -0.28041300 |

| Molecule:Zn-TYR-01 |             |             |             | Molecule:Zn-TYR-02 |             |             |             | Molecule:Zn-TYR-011 |             |             |             |
|--------------------|-------------|-------------|-------------|--------------------|-------------|-------------|-------------|---------------------|-------------|-------------|-------------|
| N                  | -1.70275500 | 2.87133700  | 0.06159800  | N                  | -3.41838100 | 1.14810600  | -0.78441600 | N                   | -2.05267200 | 2.99785400  | -0.22660100 |
| H                  | -2.24931700 | 2.51213300  | 0.84882700  | H                  | -3.85538600 | 1.46873700  | 0.08475600  | H                   | -2.51037500 | 2.91030900  | 0.68554100  |
| H                  | -2.34335500 | 3.03556700  | -0.71799400 | H                  | -4.01766200 | 0.42178400  | -1.18213400 | H                   | -2.77702200 | 2.94294800  | -0.94573300 |
| H                  | -1.28351900 | 3.76480900  | 0.32998500  | H                  | -3.36814900 | 1.92714700  | -1.44426100 | H                   | -1.60222500 | 3.91361900  | -0.28800000 |
| C                  | -0.63826300 | 1.88406300  | -0.30951100 | C                  | -2.05077800 | 0.61489200  | -0.48864900 | C                   | -1.04924500 | 1.90046300  | -0.38982900 |
| H                  | -0.17696800 | 2.23854700  | -1.22656000 | H                  | -1.68233600 | 0.15277000  | -1.40100300 | H                   | -0.71658400 | 1.91434000  | -1.42346900 |
| C                  | 0.39039300  | 1.82481500  | 0.83000000  | C                  | -1.14550100 | 1.78678400  | -0.07249100 | C                   | 0.12489600  | 2.16397500  | 0.56628800  |
| C                  | -1.27611000 | 0.51965200  | -0.56174300 | C                  | -2.19983800 | -0.42981600 | 0.62202500  | C                   | -1.74491300 | 0.58081500  | -0.06737100 |
| H                  | 0.76798300  | 2.83923600  | 0.97585300  | H                  | -1.25820500 | 2.56779500  | -0.82780600 | H                   | 0.46622300  | 3.18421500  | 0.38030500  |
| H                  | -0.12599800 | 1.52347700  | 1.74361600  | H                  | -1.50637400 | 2.18521300  | 0.87719300  | H                   | -0.24816000 | 2.11869500  | 1.59118000  |
| C                  | 1.52611200  | 0.88322500  | 0.53953300  | C                  | 0.29825300  | 1.38404800  | 0.03463300  | C                   | 1.26253200  | 1.19951900  | 0.37689900  |
| O                  | -2.29101300 | 0.26195700  | 0.18616900  | O                  | -3.08378300 | -0.26077000 | 1.46556800  | O                   | -2.65131100 | 0.56733500  | 0.77134100  |
| C                  | 1.53736100  | -0.40685600 | 1.06462800  | C                  | 0.86224900  | 1.03268800  | 1.26018900  | C                   | 1.39449800  | 0.07270000  | 1.18529900  |
| C                  | 2.57769700  | 1.26859500  | -0.29259100 | C                  | 1.08502800  | 1.26384500  | -1.11329400 | C                   | 2.19916300  | 1.39957400  | -0.63784700 |
| H                  | 0.72820800  | -0.72703400 | 1.70967100  | H                  | 0.26480100  | 1.10336700  | 2.16072900  | H                   | 0.67762700  | -0.10248900 | 1.97826000  |
| C                  | 2.56711700  | -1.29274600 | 0.77325600  | C                  | 2.17281700  | 0.58027600  | 1.34743600  | C                   | 2.42866300  | -0.83453500 | 0.99058900  |
| C                  | 3.61298800  | 0.39635400  | -0.59458200 | C                  | 2.39302900  | 0.80479100  | -1.04462800 | C                   | 3.23743900  | 0.50399500  | -0.84612300 |
| H                  | 2.58897400  | 2.26853100  | -0.70927400 | H                  | 0.66701500  | 1.53029100  | -2.07639000 | H                   | 2.11769100  | 2.27251000  | -1.27426100 |
| H                  | 2.57024300  | -2.29390500 | 1.18754100  | H                  | 2.60291700  | 0.31193200  | 2.30488300  | H                   | 2.52615000  | -1.70752600 | 1.62482900  |
| C                  | 3.60537400  | -0.88912200 | -0.05982900 | C                  | 2.93779700  | 0.46336700  | 0.19078800  | C                   | 3.34942200  | -0.61789300 | -0.02969400 |
| H                  | 4.42842500  | 0.70201400  | -1.23704800 | H                  | 2.99937000  | 0.72043900  | -1.93676800 | H                   | 3.96325300  | 0.66744400  | -1.63202900 |
| O                  | 4.65145600  | -1.72264400 | -0.38066700 | O                  | 4.23825100  | 0.01924400  | 0.21328800  | O                   | 4.39188900  | -1.48223500 | -0.26989400 |
| H                  | 4.53190700  | -2.57399200 | 0.06284400  | H                  | 4.50163100  | -0.16810100 | 1.12512900  | H                   | 4.35737100  | -2.21112300 | 0.36491600  |
| O                  | -0.77825700 | -0.23172300 | -1.39850900 | O                  | -1.39147400 | -1.42550300 | 0.63109500  | O                   | -1.28351300 | -0.43758200 | -0.69563200 |
| Zn                 | -3.11969300 | -1.49924500 | 0.03368200  | Zn                 | 0.14529200  | -1.73090500 | -0.50296900 | Zn                  | -2.09188300 | -2.14265800 | -0.16037100 |

## Molecule: Cd-LEU-01

|    |             |             |             |
|----|-------------|-------------|-------------|
| N  | -1.59517600 | 2.68616600  | 0.14959800  |
| H  | -1.37952000 | 2.87716300  | -0.83221900 |
| H  | -0.94717100 | 3.23133800  | 0.72225300  |
| H  | -2.54812100 | 3.00153800  | 0.34384300  |
| C  | -1.46682000 | 1.21960600  | 0.43050800  |
| H  | -1.64707300 | 1.09218000  | 1.49415900  |
| C  | -2.51137800 | 0.47909200  | -0.40740800 |
| C  | -0.03777700 | 0.79810600  | 0.10882000  |
| H  | -3.48081000 | 0.93514200  | -0.18448100 |
| H  | -2.29794500 | 0.66909600  | -1.46278700 |
| C  | -2.61358700 | -1.03056500 | -0.16864700 |
| O  | 0.64024100  | 1.46970700  | -0.68838900 |
| H  | -1.65093600 | -1.48492400 | -0.41694000 |
| C  | -2.94525200 | -1.36625700 | 1.28425400  |
| C  | -3.66648400 | -1.61116700 | -1.11161300 |
| H  | -3.87311400 | -0.87550500 | 1.59133200  |
| H  | -3.08038100 | -2.44286800 | 1.40537400  |
| H  | -2.15538900 | -1.05493500 | 1.96914100  |
| H  | -3.43352500 | -1.38536100 | -2.15458900 |
| H  | -3.72532100 | -2.69588500 | -1.00499200 |
| H  | -4.65447900 | -1.19754500 | -0.89129500 |
| O  | 0.37268500  | -0.25970000 | 0.68762400  |
| Cd | 2.44550900  | -0.41844900 | -0.05073600 |

## Molecule: Cu-LEU-01

|    |             |             |             |
|----|-------------|-------------|-------------|
| N  | -0.60808400 | 2.65147000  | 0.20950700  |
| H  | -0.37738700 | 2.82129000  | -0.77359500 |
| H  | 0.13364600  | 3.05716700  | 0.78528000  |
| H  | -1.48445600 | 3.13341400  | 0.42349400  |
| C  | -0.75706700 | 1.18217300  | 0.46638300  |
| H  | -0.93463600 | 1.06496800  | 1.53160100  |
| C  | -1.93160800 | 0.65756800  | -0.36162900 |
| C  | 0.55193300  | 0.51761500  | 0.10843800  |
| H  | -2.80891300 | 1.24171100  | -0.06944400 |
| H  | -1.72749700 | 0.87309500  | -1.41377900 |
| C  | -2.24280900 | -0.83226400 | -0.19441200 |
| O  | 1.27516600  | 0.94786400  | -0.81638600 |
| H  | -1.37397700 | -1.40543700 | -0.53268100 |
| C  | -2.53174300 | -1.20824700 | 1.25795200  |
| C  | -3.42604500 | -1.19015800 | -1.09275500 |
| H  | -3.35193300 | -0.60511600 | 1.65734700  |
| H  | -2.82414900 | -2.25773500 | 1.32641500  |
| H  | -1.66283900 | -1.06663200 | 1.90199000  |
| H  | -3.22566700 | -0.93434000 | -2.13529100 |
| H  | -3.64169200 | -2.25884300 | -1.04147300 |
| H  | -4.32401900 | -0.65084600 | -0.77884200 |
| O  | 0.92832500  | -0.50686900 | 0.77667500  |
| Cu | 2.62952500  | -0.68486400 | -0.10806000 |

## Molecule: Cd-LEU-02

|    |             |             |             |
|----|-------------|-------------|-------------|
| N  | -2.32653400 | -1.69149300 | -1.24470200 |
| H  | -2.94070500 | -2.08905200 | -0.52797200 |
| H  | -1.86992900 | -2.47002700 | -1.72460500 |
| H  | -2.89001200 | -1.17581400 | -1.92378100 |
| C  | -1.32160300 | -0.79374300 | -0.59076000 |
| H  | -0.59151100 | -0.53074700 | -1.35165200 |
| C  | -2.04464200 | 0.44420400  | -0.05199800 |
| C  | -0.66039000 | -1.59913700 | 0.53326500  |
| H  | -2.75767700 | 0.77295100  | -0.81399800 |
| H  | -2.62657700 | 0.14254900  | 0.82243400  |
| C  | -1.14638500 | 1.63500200  | 0.30301100  |
| O  | -1.32524400 | -2.48161400 | 1.08716400  |
| H  | -0.33517900 | 1.28668900  | 0.94904300  |
| C  | -0.53480000 | 2.27851500  | -0.94160200 |
| C  | -1.96219000 | 2.65673000  | 1.09292200  |
| H  | -1.31998300 | 2.64280500  | -1.60992400 |
| H  | 0.09396900  | 3.12694000  | -0.66589500 |
| H  | 0.08651100  | 1.58100000  | -1.51145300 |
| H  | -2.34885500 | 2.22145700  | 2.01675500  |
| H  | -1.35345200 | 3.52386200  | 1.35580600  |
| H  | -2.81410900 | 3.00967000  | 0.50497900  |
| O  | 0.53676800  | -1.29914000 | 0.87705100  |
| Cd | 1.88085700  | 0.04822400  | -0.09561600 |

## Molecule: Cu-LEU-021

|    |             |             |             |
|----|-------------|-------------|-------------|
| N  | -0.66163500 | -2.55419700 | 1.12296100  |
| H  | -0.72093400 | -3.22979600 | 0.35550800  |
| H  | -1.57496800 | -2.52745500 | 1.58206100  |
| H  | 0.03564300  | -2.87827500 | 1.79607300  |
| C  | -0.28492100 | -1.21102900 | 0.58289200  |
| H  | -0.35665200 | -0.50545200 | 1.40714100  |
| C  | 1.13965700  | -1.28432300 | 0.02835600  |
| C  | -1.30045900 | -0.86085000 | -0.50222900 |
| H  | 1.75582100  | -1.79673500 | 0.77327300  |
| H  | 1.12183000  | -1.91365500 | -0.86493900 |
| C  | 1.79328700  | 0.06264300  | -0.29620500 |
| O  | -1.85229400 | -1.76044600 | -1.12998500 |
| H  | 1.11126800  | 0.64310300  | -0.92746000 |
| C  | 2.09905800  | 0.87232700  | 0.96401100  |
| C  | 3.07329400  | -0.18349600 | -1.09338100 |
| H  | 2.75308800  | 0.30770800  | 1.63396100  |
| H  | 2.60379100  | 1.80479700  | 0.70557000  |
| H  | 1.19732300  | 1.13528800  | 1.52515300  |
| H  | 2.86516400  | -0.71938600 | -2.02168100 |
| H  | 3.56083300  | 0.75966000  | -1.34660800 |
| H  | 3.77996700  | -0.78122700 | -0.51059200 |
| O  | -1.52372900 | 0.38942500  | -0.74623600 |
| Cu | -0.88317400 | 1.86818400  | 0.17037600  |

## Molecule: Cd-LEU-031

|    |             |             |             |
|----|-------------|-------------|-------------|
| N  | 0.10350600  | 1.59013300  | 1.82440300  |
| H  | -0.75385700 | 1.03169800  | 1.83962300  |
| H  | -0.16133400 | 2.57480000  | 1.74676300  |
| H  | 0.57848000  | 1.45893200  | 2.72076400  |
| C  | 1.01223600  | 1.17946000  | 0.70290000  |
| H  | 1.88418200  | 1.82108000  | 0.78540700  |
| C  | 1.39632100  | -0.28502800 | 0.89427900  |
| C  | 0.35156700  | 1.47994000  | -0.65090200 |
| H  | 1.94698800  | -0.36250100 | 1.83652500  |
| H  | 0.48476300  | -0.87964100 | 1.01575900  |
| C  | 2.23851500  | -0.87916600 | -0.23792600 |
| O  | -0.87619400 | 1.14520700  | -0.83839700 |
| H  | 1.67966700  | -0.76664100 | -1.17295900 |
| C  | 3.58238800  | -0.16792600 | -0.39127500 |
| C  | 2.44128100  | -2.37199200 | 0.01187700  |
| H  | 4.15751400  | -0.23130100 | 0.53663100  |
| H  | 4.17103600  | -0.63540900 | -1.18302200 |
| H  | 3.46426100  | 0.88573800  | -0.64547400 |
| H  | 1.48579400  | -2.89481400 | 0.09211100  |
| H  | 3.01023800  | -2.82741800 | -0.80075000 |
| H  | 2.99394800  | -2.53552400 | 0.94103800  |
| O  | 1.03410700  | 2.04977100  | -1.50434200 |
| Cd | -1.93882000 | -0.56378100 | -0.07739700 |

## Molecule: Cu-LEU-031

|    |             |             |             |
|----|-------------|-------------|-------------|
| N  | -0.62520800 | 1.29553300  | 1.84127300  |
| H  | -1.35245100 | 0.57580700  | 1.83303300  |
| H  | -1.07903700 | 2.21080200  | 1.78803500  |
| H  | -0.13506800 | 1.23393200  | 2.73757300  |
| C  | 0.35046000  | 1.10199200  | 0.71619400  |
| H  | 1.06461000  | 1.91350900  | 0.81034600  |
| C  | 1.03872500  | -0.24852500 | 0.87511700  |
| C  | -0.34723400 | 1.28471100  | -0.63675700 |
| H  | 1.57279100  | -0.23684700 | 1.82988100  |
| H  | 0.28310800  | -1.03575000 | 0.94852200  |
| C  | 2.01614000  | -0.59806800 | -0.25212000 |
| O  | -1.35861800 | 0.53281600  | -0.93983100 |
| H  | 1.46454700  | -0.57834200 | -1.19805800 |
| C  | 3.17077800  | 0.39790400  | -0.34835400 |
| C  | 2.53687700  | -2.01870200 | -0.04667400 |
| H  | 3.72478000  | 0.43805700  | 0.59362300  |
| H  | 3.86651800  | 0.09711000  | -1.13395500 |
| H  | 2.82693500  | 1.40651100  | -0.58174300 |
| H  | 1.71809200  | -2.74053100 | -0.01331300 |
| H  | 3.20820700  | -2.30523200 | -0.85824500 |
| H  | 3.09342300  | -2.09509100 | 0.89145200  |
| O  | 0.07743600  | 2.13508000  | -1.41081900 |
| Cu | -2.00775900 | -0.99350700 | -0.12328600 |

## Molecule: Fe-LEU-01

|    |             |             |             |
|----|-------------|-------------|-------------|
| N  | -0.43908300 | 2.64861600  | 0.09697400  |
| H  | -0.16909300 | 2.74829200  | -0.88644600 |
| H  | 0.29423600  | 3.06433300  | 0.67770800  |
| H  | -1.30400000 | 3.17591800  | 0.24413100  |
| C  | -0.66890400 | 1.21081900  | 0.44569000  |
| H  | -0.90595000 | 1.17126400  | 1.50542400  |
| C  | -1.81713800 | 0.66502100  | -0.41147600 |
| C  | 0.60685100  | 0.45551500  | 0.21450700  |
| H  | -2.68800800 | 1.28773900  | -0.18961000 |
| H  | -1.55670400 | 0.81935400  | -1.46115200 |
| C  | -2.17165300 | -0.80627000 | -0.17958900 |
| O  | 1.40909400  | 0.75936700  | -0.72308500 |
| H  | -1.29990000 | -1.41622300 | -0.43670000 |
| C  | -2.55357600 | -1.09475100 | 1.27097600  |
| C  | -3.30801700 | -1.18890300 | -1.12611100 |
| H  | -3.38566300 | -0.45796300 | 1.58390000  |
| H  | -2.86857600 | -2.13408000 | 1.37979700  |
| H  | -1.72323000 | -0.92977700 | 1.95910600  |
| H  | -3.04113500 | -0.99679400 | -2.16733400 |
| H  | -3.55126200 | -2.24810700 | -1.02737200 |
| H  | -4.20936400 | -0.61359500 | -0.89786600 |
| O  | 0.94654400  | -0.52909300 | 0.93783800  |
| Fe | 2.69660600  | -0.74236400 | -0.15247700 |

## Molecule: Hg-LEU-02

|    |             |             |             |
|----|-------------|-------------|-------------|
| N  | 2.67800600  | -1.70178900 | 1.26383300  |
| H  | 3.32382800  | -2.07669100 | 0.56295300  |
| H  | 2.21423000  | -2.49446000 | 1.71333900  |
| H  | 3.21234000  | -1.19429600 | 1.97242500  |
| C  | 1.68702000  | -0.79571800 | 0.60161800  |
| H  | 0.94368100  | -0.53826500 | 1.35109000  |
| C  | 2.42257700  | 0.44606200  | 0.08681200  |
| C  | 1.05127700  | -1.58757700 | -0.54220100 |
| H  | 3.10297100  | 0.77834600  | 0.87662900  |
| H  | 3.03956200  | 0.14427600  | -0.76309700 |
| C  | 1.53032400  | 1.62913100  | -0.30618400 |
| O  | 1.71243400  | -2.46024300 | -1.10091700 |
| H  | 0.73793800  | 1.27054100  | -0.96945400 |
| C  | 0.87949000  | 2.27881800  | 0.91467500  |
| C  | 2.36302100  | 2.64819500  | -1.08105700 |
| H  | 1.64119600  | 2.65720800  | 1.60197900  |
| H  | 0.24918000  | 3.11733500  | 0.61371600  |
| H  | 0.24902500  | 1.57797500  | 1.47065900  |
| H  | 2.78134700  | 2.20738100  | -1.98832200 |
| H  | 1.75574300  | 3.50778200  | -1.37085700 |
| H  | 3.19346600  | 3.01436600  | -0.47086200 |
| O  | -0.14987800 | -1.29893000 | -0.93348900 |
| Hg | -1.46616600 | 0.02876200  | 0.05982800  |

## Molecule: Fe-LEU-027

|    |             |             |             |
|----|-------------|-------------|-------------|
| N  | 0.69670700  | 2.53090100  | 1.09864500  |
| H  | 0.70954800  | 3.22259000  | 0.34332000  |
| H  | 1.62802100  | 2.51228400  | 1.52223500  |
| H  | 0.02356300  | 2.83460000  | 1.80603200  |
| C  | 0.31197500  | 1.18745400  | 0.56837900  |
| H  | 0.36982800  | 0.48608100  | 1.39802900  |
| C  | -1.10305000 | 1.26295300  | -0.01234600 |
| C  | 1.33839900  | 0.80996000  | -0.48640800 |
| H  | -1.71418400 | 1.81310800  | 0.70871400  |
| H  | -1.06166600 | 1.86211600  | -0.92485000 |
| C  | -1.78398500 | -0.07990000 | -0.29595600 |
| O  | 1.94652800  | 1.63575300  | -1.12949800 |
| H  | -1.12213700 | -0.69592200 | -0.91672700 |
| C  | -2.10648500 | -0.84532000 | 0.98668000  |
| C  | -3.06255700 | 0.17960900  | -1.09256800 |
| H  | -2.75309600 | -0.24972400 | 1.63656400  |
| H  | -2.62442000 | -1.77740000 | 0.75560700  |
| H  | -1.21197700 | -1.10052400 | 1.56073400  |
| H  | -2.84781500 | 0.68877700  | -2.03409500 |
| H  | -3.57657100 | -0.75598600 | -1.31882300 |
| H  | -3.74781700 | 0.80890700  | -0.51749200 |
| O  | 1.51712000  | -0.48698100 | -0.68577400 |
| Fe | 0.91449200  | -1.98630400 | 0.18483600  |

## Molecule: Hg-LEU-011

|    |             |             |             |
|----|-------------|-------------|-------------|
| N  | -1.79814500 | 2.61846900  | -0.14927600 |
| H  | -1.38107000 | 2.59395100  | -1.08311300 |
| H  | -1.16886200 | 3.14183000  | 0.46332200  |
| H  | -2.68844600 | 3.11920400  | -0.20559800 |
| C  | -2.02568000 | 1.22808800  | 0.36396200  |
| H  | -2.44234100 | 1.33441600  | 1.36136900  |
| C  | -3.00143800 | 0.52011400  | -0.57704700 |
| C  | -0.69076000 | 0.49422900  | 0.48377600  |
| H  | -3.90014600 | 1.14259600  | -0.63043300 |
| H  | -2.55837200 | 0.50158400  | -1.57628300 |
| C  | -3.40384000 | -0.90078800 | -0.17024100 |
| O  | 0.21572600  | 0.89891400  | -0.34099000 |
| H  | -2.50216300 | -1.51924200 | -0.14750300 |
| C  | -4.05832000 | -0.94939700 | 1.20945300  |
| C  | -4.33999500 | -1.47552400 | -1.23214700 |
| H  | -4.94489900 | -0.30945400 | 1.23877000  |
| H  | -4.37390700 | -1.96783900 | 1.44415000  |
| H  | -3.38070100 | -0.62435400 | 2.00005700  |
| H  | -3.87461500 | -1.46612600 | -2.22006300 |
| H  | -4.60722800 | -2.50664500 | -0.99337300 |
| H  | -5.26400400 | -0.89357200 | -1.28967900 |
| O  | -0.56986600 | -0.41012000 | 1.30417100  |
| Hg | 2.04533800  | -0.22857900 | -0.06860800 |

## Molecule: Fe-LEU-031

|    |             |             |             |
|----|-------------|-------------|-------------|
| N  | 0.65181500  | -1.28465500 | 1.84738300  |
| H  | 1.37939700  | -0.56331400 | 1.85108500  |
| H  | 1.10677900  | -2.20066800 | 1.80497400  |
| H  | 0.14417000  | -1.22171700 | 2.73448600  |
| C  | -0.30889300 | -1.09565600 | 0.71108800  |
| H  | -1.01659000 | -1.91590500 | 0.77974200  |
| C  | -1.00883700 | 0.25148200  | 0.86470300  |
| C  | 0.39239800  | -1.24323400 | -0.63729900 |
| H  | -1.53737800 | 0.22917300  | 1.82218800  |
| H  | -0.25944800 | 1.04439600  | 0.93621200  |
| C  | -1.99482800 | 0.59743500  | -0.25589600 |
| O  | 1.45903000  | -0.47562000 | -0.85816300 |
| H  | -1.43996600 | 0.63099500  | -1.19969700 |
| C  | -3.11202500 | -0.43543700 | -0.39220100 |
| C  | -2.56779500 | 1.98971200  | 0.00012700  |
| H  | -3.66113800 | -0.53665400 | 0.54770600  |
| H  | -3.81965500 | -0.12444600 | -1.16286700 |
| H  | -2.73276000 | -1.41928300 | -0.67159700 |
| H  | -1.77692100 | 2.73934000  | 0.07046700  |
| H  | -3.24264300 | 2.28329200  | -0.80565300 |
| H  | -3.13371200 | 2.00780700  | 0.93550000  |
| O  | -0.01317800 | -1.99662000 | -1.48823400 |
| Fe | 2.13308600  | 1.05506500  | -0.13639200 |

## Molecule: Hg-LEU-021

|    |             |             |             |
|----|-------------|-------------|-------------|
| N  | 2.67850800  | -1.70155300 | 1.26363800  |
| H  | 3.32415100  | -2.07637100 | 0.56255500  |
| H  | 2.21504200  | -2.49427100 | 1.71338800  |
| H  | 3.21297900  | -1.19388900 | 1.97201000  |
| C  | 1.68712400  | -0.79570400 | 0.60172400  |
| H  | 0.94384400  | -0.53861000 | 1.35136800  |
| C  | 2.42238300  | 0.44629900  | 0.08698500  |
| C  | 1.05137400  | -1.58759800 | -0.54210600 |
| H  | 3.10261300  | 0.77871900  | 0.87689100  |
| H  | 3.03953900  | 0.14459800  | -0.76283400 |
| C  | 1.53008200  | 1.62924600  | -0.30622100 |
| O  | 1.71273500  | -2.45996700 | -1.10105100 |
| H  | 0.73774100  | 1.27054800  | -0.96949400 |
| C  | 0.87917200  | 2.27909600  | 0.91449800  |
| C  | 2.36280200  | 2.64826300  | -1.08114300 |
| H  | 1.64081500  | 2.65765600  | 1.60177800  |
| H  | 0.24879900  | 3.11750700  | 0.61336900  |
| H  | 0.24876500  | 1.57832200  | 1.47060600  |
| H  | 2.78109200  | 2.20741100  | -1.98840800 |
| H  | 1.75556900  | 3.50788400  | -1.37093800 |
| H  | 3.19329000  | 3.01438800  | -0.47097100 |
| O  | -0.14999800 | -1.29940300 | -0.93305400 |
| Hg | -1.46616600 | 0.02867900  | 0.05982000  |



## Molecule:Mn-LEU-11

|    |             |             |             |
|----|-------------|-------------|-------------|
| N  | -0.82314900 | 2.69667900  | -0.05591400 |
| H  | -0.39811700 | 2.76567700  | -0.98491500 |
| H  | -0.27762800 | 3.28147700  | 0.58040000  |
| H  | -1.77659600 | 3.06224000  | -0.09567000 |
| C  | -0.81790700 | 1.26386100  | 0.38593000  |
| H  | -1.10396000 | 1.25397300  | 1.43303900  |
| C  | -1.80666100 | 0.48676500  | -0.48736200 |
| C  | 0.59834400  | 0.72646700  | 0.20770000  |
| H  | -2.76646800 | 1.01121000  | -0.45595900 |
| H  | -1.44705500 | 0.52877400  | -1.51889800 |
| C  | -2.02966700 | -0.97241100 | -0.07817700 |
| O  | 1.28500500  | 1.19276500  | -0.72837700 |
| H  | -1.05563200 | -1.46410800 | -0.00935100 |
| C  | -2.72308000 | -1.07938900 | 1.27879400  |
| C  | -2.83903300 | -1.68279600 | -1.16173400 |
| H  | -3.68556400 | -0.56010000 | 1.25775100  |
| H  | -2.91190100 | -2.12397600 | 1.53354500  |
| H  | -2.12484200 | -0.64588400 | 2.08186400  |
| H  | -2.31866300 | -1.65788000 | -2.12161900 |
| H  | -3.00957900 | -2.72801600 | -0.89643200 |
| H  | -3.81489800 | -1.20756300 | -1.29536300 |
| O  | 0.97157200  | -0.20621400 | 0.97902400  |
| Mn | 2.88433400  | -0.82959800 | -0.07972300 |

## Molecule:Ni-LEU-01

|    |             |             |             |
|----|-------------|-------------|-------------|
| N  | -0.47363900 | 2.66024900  | 0.07606600  |
| H  | -0.17646600 | 2.74333500  | -0.90044200 |
| H  | 0.24164000  | 3.09190400  | 0.66663300  |
| H  | -1.34657800 | 3.18117000  | 0.19175500  |
| C  | -0.69227700 | 1.22446600  | 0.44010600  |
| H  | -0.94306100 | 1.19874300  | 1.49665500  |
| C  | -1.82780100 | 0.66408100  | -0.42353700 |
| C  | 0.59566400  | 0.47581600  | 0.22511800  |
| H  | -2.70344000 | 1.29105900  | -0.23333000 |
| H  | -1.54916300 | 0.79472000  | -1.47210300 |
| C  | -2.19182600 | -0.80107000 | -0.16681500 |
| O  | 1.41422800  | 0.82830100  | -0.67986100 |
| H  | -1.31175900 | -1.41650400 | -0.37519100 |
| C  | -2.62649800 | -1.04899200 | 1.27651200  |
| C  | -3.29229100 | -1.21448700 | -1.14242400 |
| H  | -3.47468300 | -0.41012100 | 1.53790100  |
| H  | -2.93664900 | -2.08740800 | 1.40681600  |
| H  | -1.82428200 | -0.85359900 | 1.98954200  |
| H  | -2.98184800 | -1.06438300 | -2.17850500 |
| H  | -3.54402100 | -2.26861800 | -1.01328900 |
| H  | -4.19986300 | -0.62852100 | -0.97388800 |
| O  | 0.88003000  | -0.54378900 | 0.92269300  |
| Ni | 2.56863400  | -0.72387500 | -0.13826500 |

## Molecule:Mn-LEU-022

|    |             |             |             |
|----|-------------|-------------|-------------|
| N  | 2.20965500  | 1.19816700  | 1.27335500  |
| H  | 2.80540500  | 1.63222000  | 0.56194000  |
| H  | 2.77306700  | 0.50032400  | 1.76280800  |
| H  | 1.90902700  | 1.90713000  | 1.94452500  |
| C  | 1.03345800  | 0.56166900  | 0.59930400  |
| H  | 0.55470000  | -0.07479900 | 1.33957800  |
| C  | 0.08710700  | 1.65648400  | 0.10339500  |
| C  | 1.56786500  | -0.28394700 | -0.56608000 |
| H  | -0.02100800 | 2.40068700  | 0.89848700  |
| H  | 0.56093900  | 2.15858000  | -0.74371500 |
| C  | -1.30998500 | 1.16343200  | -0.29213900 |
| O  | 2.61773300  | 0.09153700  | -1.11399800 |
| H  | -1.20069600 | 0.27475800  | -0.92164200 |
| C  | -2.13829800 | 0.77996300  | 0.93356500  |
| C  | -2.02288600 | 2.24005100  | -1.10642700 |
| H  | -2.31011000 | 1.65289900  | 1.56881600  |
| H  | -3.11015500 | 0.38287900  | 0.63495000  |
| H  | -1.64415700 | 0.02094100  | 1.54571600  |
| H  | -1.46781500 | 2.48290500  | -2.01484200 |
| H  | -3.02298700 | 1.91221400  | -1.39649200 |
| H  | -2.12725200 | 3.15839600  | -0.52156600 |
| O  | 0.87725300  | -1.29016300 | -0.92184200 |
| Mn | -0.81720000 | -2.15652800 | 0.18739900  |

## Molecule:Ni-LEU-021

|    |             |             |             |
|----|-------------|-------------|-------------|
| N  | -0.76610600 | 2.52270600  | 1.13108100  |
| H  | -1.10118400 | 3.12164800  | 0.37129000  |
| H  | 0.04692100  | 2.97800400  | 1.55282900  |
| H  | -1.50115900 | 2.44714700  | 1.83782400  |
| C  | -0.41561500 | 1.16821700  | 0.59877000  |
| H  | 0.02464000  | 0.61218400  | 1.42254400  |
| C  | -1.69288900 | 0.49746700  | 0.08539600  |
| C  | 0.60342400  | 1.37440500  | -0.51810600 |
| H  | -2.44964400 | 0.59022500  | 0.87016400  |
| H  | -2.04622800 | 1.06767100  | -0.77727800 |
| C  | -1.55470700 | -0.98143600 | -0.28865800 |
| O  | 0.57243900  | 2.38954400  | -1.19512500 |
| H  | -0.69723500 | -1.09480600 | -0.95956300 |
| C  | -1.33657300 | -1.86500800 | 0.93897200  |
| C  | -2.80299900 | -1.42535600 | -1.04845300 |
| H  | -2.19712100 | -1.80706400 | 1.61125300  |
| H  | -1.20922500 | -2.90780800 | 0.64410200  |
| H  | -0.45427000 | -1.57660000 | 1.51927400  |
| H  | -2.93400100 | -0.84587200 | -1.96436600 |
| H  | -2.73742100 | -2.48064600 | -1.31965100 |
| H  | -3.69694100 | -1.29211800 | -0.43290600 |
| O  | 1.47599400  | 0.42659800  | -0.73758900 |
| Ni | 1.89729600  | -1.12892100 | 0.16289600  |

## Molecule:Mn-LEU-031

|    |             |             |             |
|----|-------------|-------------|-------------|
| N  | 0.66579700  | -1.27593900 | 1.80015200  |
| H  | 1.39141600  | -0.55874400 | 1.73709100  |
| H  | 1.12078800  | -2.19037100 | 1.75804500  |
| H  | 0.20748800  | -1.18605700 | 2.70966300  |
| C  | -0.33555500 | -1.11405200 | 0.69418100  |
| H  | -1.06584700 | -1.90530300 | 0.83332900  |
| C  | -0.97732300 | 0.26450800  | 0.83392200  |
| C  | 0.35621100  | -1.32536700 | -0.66139700 |
| H  | -1.46127000 | 0.31081800  | 1.81431100  |
| H  | -0.18328500 | 1.01663700  | 0.84122000  |
| C  | -1.99782700 | 0.62224100  | -0.24902500 |
| O  | 1.52862200  | -0.84293700 | -0.80798900 |
| H  | -1.52302600 | 0.48943900  | -1.22592400 |
| C  | -3.23294300 | -0.27388200 | -0.18856500 |
| C  | -2.38372200 | 2.09357300  | -0.11170200 |
| H  | -3.72604400 | -0.18088100 | 0.78312600  |
| H  | -3.95201500 | 0.01401300  | -0.95798700 |
| H  | -2.98514700 | -1.32479300 | -0.34367600 |
| H  | -1.50861800 | 2.74078300  | -0.20455100 |
| H  | -3.10124700 | 2.38057800  | -0.88264600 |
| H  | -2.84248900 | 2.28604600  | 0.86210900  |
| O  | -0.26985100 | -1.94803700 | -1.52901600 |
| Mn | 2.25302000  | 1.11060300  | -0.14134500 |

## Molecule:Ni-LEU-031

|    |             |             |             |
|----|-------------|-------------|-------------|
| N  | -0.49512700 | 1.49701100  | 1.77841300  |
| H  | -1.19456100 | 0.75917700  | 1.89933400  |
| H  | -0.98507500 | 2.38459700  | 1.64240300  |
| H  | 0.04869800  | 1.56094400  | 2.64321900  |
| C  | 0.41805800  | 1.18966100  | 0.62966800  |
| H  | 1.13148500  | 2.00662700  | 0.58049800  |
| C  | 1.11377900  | -0.14371800 | 0.90013500  |
| C  | -0.36592200 | 1.18653000  | -0.67803700 |
| H  | 1.69830800  | -0.02542200 | 1.81700900  |
| H  | 0.34840200  | -0.89950400 | 1.10429900  |
| C  | 2.02598400  | -0.63910600 | -0.22516800 |
| O  | -1.54609000 | 0.59897000  | -0.67398300 |
| H  | 1.41901900  | -0.76443700 | -1.12785100 |
| C  | 3.15328800  | 0.34515800  | -0.53355200 |
| C  | 2.58880600  | -2.00630500 | 0.15654500  |
| H  | 3.75200200  | 0.53663500  | 0.36114900  |
| H  | 3.81604800  | -0.06391400 | -1.29848600 |
| H  | 2.77772600  | 1.30104500  | -0.90053700 |
| H  | 1.78954800  | -2.71920100 | 0.37042600  |
| H  | 3.19978100  | -2.41303500 | -0.65120700 |
| H  | 3.21816800  | -1.92831100 | 1.04728400  |
| O  | 0.08394800  | 1.71785100  | -1.67265000 |
| Ni | -2.12358900 | -1.01222000 | -0.09503200 |



## Molecule:Zn-LEU-02

|    |             |             |             |
|----|-------------|-------------|-------------|
| N  | -1.05175100 | 2.36180300  | 1.23388500  |
| H  | -1.51180200 | 2.92479100  | 0.51259900  |
| H  | -0.28119800 | 2.91381300  | 1.61637400  |
| H  | -1.71777600 | 2.16880100  | 1.98501900  |
| C  | -0.55327600 | 1.08675500  | 0.62675700  |
| H  | 0.06610100  | 0.60582000  | 1.37867300  |
| C  | -1.76255700 | 0.23011600  | 0.24728800  |
| C  | 0.29449000  | 1.45930300  | -0.59403100 |
| H  | -2.38930800 | 0.12518000  | 1.13850700  |
| H  | -2.34252700 | 0.78614500  | -0.49419400 |
| C  | -1.43473900 | -1.16362800 | -0.29868600 |
| O  | -0.03803300 | 2.44362800  | -1.25924700 |
| H  | -0.67995100 | -1.05857400 | -1.08253700 |
| C  | -0.88891600 | -2.09207400 | 0.78554800  |
| C  | -2.68462600 | -1.76984900 | -0.93482100 |
| H  | -1.66649400 | -2.32211000 | 1.51885100  |
| H  | -0.54353900 | -3.03263700 | 0.35350600  |
| H  | -0.05589200 | -1.64826600 | 1.33797300  |
| H  | -3.05774900 | -1.14526200 | -1.74890200 |
| H  | -2.47181800 | -2.76210600 | -1.33765000 |
| H  | -3.48349300 | -1.87398300 | -0.19520600 |
| O  | 1.29721400  | 0.71019100  | -0.88633200 |
| Zn | 1.98673300  | -0.79828400 | 0.15173600  |

## Molecule:Zn-LEU-03

|    |             |             |             |
|----|-------------|-------------|-------------|
| N  | 0.56098900  | -1.33912900 | 1.80308700  |
| H  | 1.29663500  | -0.62807700 | 1.79499800  |
| H  | 1.00529500  | -2.25838200 | 1.74613800  |
| H  | 0.07350900  | -1.27533000 | 2.70032800  |
| C  | -0.40967100 | -1.12917500 | 0.67690100  |
| H  | -1.14437700 | -1.92255500 | 0.77232000  |
| C  | -1.06171800 | 0.24026900  | 0.84041100  |
| C  | 0.29959300  | -1.32058100 | -0.67029800 |
| H  | -1.56449200 | 0.25541800  | 1.81217000  |
| H  | -0.28365000 | 1.00736800  | 0.88382700  |
| C  | -2.06982600 | 0.60270300  | -0.25444300 |
| O  | 1.41798500  | -0.71203100 | -0.87252100 |
| H  | -1.58970200 | 0.45880800  | -1.22777600 |
| C  | -3.31376100 | -0.28145300 | -0.19675500 |
| C  | -2.44298400 | 2.07847300  | -0.13187900 |
| H  | -3.81380500 | -0.17469200 | 0.76989200  |
| H  | -4.02331100 | 0.00587300  | -0.97502500 |
| H  | -3.07531600 | -1.33635700 | -0.34003800 |
| H  | -1.56257700 | 2.71708000  | -0.23230400 |
| H  | -3.15852900 | 2.36299700  | -0.90552700 |
| H  | -2.89951800 | 2.28484300  | 0.84004700  |
| O  | -0.22996600 | -2.05612200 | -1.50242300 |
| Zn | 2.04329900  | 0.96269000  | -0.09482400 |

## Molecule:Zn-LEU-012

|    |             |             |             |
|----|-------------|-------------|-------------|
| N  | -0.76224900 | 2.69243400  | 0.11127100  |
| H  | -0.47207200 | 2.80479900  | -0.86430800 |
| H  | -0.08044800 | 3.17145900  | 0.70421000  |
| H  | -1.67117200 | 3.14518100  | 0.23258000  |
| C  | -0.85509600 | 1.23638300  | 0.45517200  |
| H  | -1.05296600 | 1.17726500  | 1.52063500  |
| C  | -1.98288800 | 0.61444600  | -0.36908200 |
| C  | 0.48742500  | 0.59504400  | 0.14546700  |
| H  | -2.90467000 | 1.14437200  | -0.11157500 |
| H  | -1.77506500 | 0.80942700  | -1.42445500 |
| C  | -2.18687600 | -0.88913600 | -0.16053000 |
| O  | 1.10533400  | 0.91664400  | -0.89297000 |
| H  | -1.25260500 | -1.40046400 | -0.41314800 |
| C  | -2.54602000 | -1.23109000 | 1.28432800  |
| C  | -3.26570500 | -1.38527800 | -1.12114500 |
| H  | -3.45281100 | -0.70209100 | 1.59062400  |
| H  | -2.73258600 | -2.30188000 | 1.38725700  |
| H  | -1.74874500 | -0.96760400 | 1.98055700  |
| H  | -3.00427500 | -1.16652700 | -2.15870100 |
| H  | -3.40301500 | -2.46400800 | -1.02647700 |
| H  | -4.22462600 | -0.90495700 | -0.90799500 |
| O  | 0.93078500  | -0.28185300 | 0.95253000  |
| Zn | 2.63056000  | -0.66375200 | -0.10566100 |

Molecule: Cd-MET-01

|    |             |             |             |
|----|-------------|-------------|-------------|
| N  | -0.35963900 | 3.12069500  | -0.00963400 |
| H  | -0.11810400 | 3.08098900  | -1.00358200 |
| H  | 0.43720000  | 3.52313900  | 0.48896200  |
| H  | -1.16401400 | 3.74138000  | 0.10865200  |
| C  | -0.68284600 | 1.75161000  | 0.50406500  |
| H  | -0.88524500 | 1.85217600  | 1.56747200  |
| C  | -1.91834300 | 1.23080600  | -0.23504900 |
| C  | 0.52854200  | 0.85333800  | 0.30752100  |
| H  | -2.69962600 | 1.98690300  | -0.12619600 |
| H  | -1.68516200 | 1.14501600  | -1.29869000 |
| C  | -2.41172800 | -0.10062000 | 0.30988200  |
| O  | 1.34099700  | 1.12602100  | -0.61844900 |
| H  | -1.68884600 | -0.89327500 | 0.12165000  |
| H  | -2.57936100 | -0.03564500 | 1.38590300  |
| S  | -3.97953200 | -0.54990900 | -0.50350500 |
| C  | -4.24917900 | -2.16058700 | 0.28116400  |
| H  | -4.32626500 | -2.05518700 | 1.36328100  |
| H  | -5.18785800 | -2.55744000 | -0.10360600 |
| H  | -3.44298500 | -2.85148500 | 0.03489900  |
| O  | 0.65377900  | -0.14416200 | 1.06275700  |
| Cd | 2.62444500  | -0.77677200 | -0.10365000 |

Molecule: Cd-MET-02

|    |              |             |             |
|----|--------------|-------------|-------------|
| N  | -3.20958000  | -2.03574600 | -0.16852200 |
| H  | -3.59156000  | -1.82301000 | -1.09549400 |
| H  | -3.98350500  | -2.36454600 | 0.41172400  |
| H  | -2.51697400  | -2.78312400 | -0.24297500 |
| C  | -2.61968900  | -0.78323200 | 0.39920100  |
| H  | -2.44254100  | -0.96050400 | 1.45662700  |
| C  | -1.30695200  | -0.50073200 | -0.33335800 |
| C  | -3.64394400  | 0.35747000  | 0.22056700  |
| H  | -2.64389500  | -1.35809500 | -0.19122900 |
| H  | -1.51240000  | -0.40853500 | -1.40246500 |
| C  | -0.63866700  | 0.76161700  | 0.18379300  |
| O  | -4.42593000  | 0.26051400  | -0.75639900 |
| H  | -1.625931700 | 1.64106100  | 0.01965700  |
| H  | -0.39232800  | 0.69322500  | 1.24107100  |
| S  | 0.89102100   | 1.10034600  | -0.75024000 |
| C  | 1.47909300   | 2.58784100  | 0.10504800  |
| H  | 1.52460000   | 2.41422900  | 1.17667500  |
| H  | 2.46889000   | 2.81278500  | -0.28650000 |
| H  | 0.79291900   | 3.40005700  | -0.12638700 |
| O  | -3.57606500  | 1.28832400  | 1.05525500  |
| Cd | 2.58674500   | -0.65723700 | 0.13292600  |

Molecule: Cd-MET-031

|    |             |             |             |
|----|-------------|-------------|-------------|
| N  | -0.70522700 | 3.08110300  | -0.97175300 |
| H  | -0.47951600 | 3.71353700  | -0.19763000 |
| H  | -1.69776700 | 3.19507000  | -1.18819200 |
| H  | -0.15934300 | 3.34600400  | -1.79460800 |
| C  | -0.40449200 | 1.67614600  | -0.55651700 |
| H  | -0.84024800 | 1.02022300  | -1.30755500 |
| C  | 1.11395200  | 1.50414200  | -0.50157600 |
| C  | -1.06536300 | 1.44022800  | 0.80705500  |
| H  | 1.50082500  | 1.71066700  | -1.50222100 |
| H  | 1.52393600  | 2.25774500  | 0.17482300  |
| C  | 1.55241200  | 0.11878200  | -0.05152000 |
| O  | -1.16564200 | 2.40079700  | 1.57808700  |
| H  | 1.27308800  | -0.06233500 | 0.98546500  |
| H  | 1.10004700  | -0.65864700 | -0.67526600 |
| S  | 3.36399000  | -0.01182500 | -0.18375000 |
| C  | 3.59942300  | -1.60561300 | 0.64285500  |
| H  | 3.06077400  | -2.39718000 | 0.12178500  |
| H  | 4.66579000  | -1.82718500 | 0.61827800  |
| H  | 3.27032800  | -1.55584700 | 1.68061200  |
| O  | -1.44563800 | 0.25201800  | 1.09450200  |
| Cd | -1.45813600 | -1.46135800 | -0.22074400 |

Molecule: Cu-MET-01

|    |             |             |             |
|----|-------------|-------------|-------------|
| N  | 0.35425300  | 3.13465400  | 0.18514600  |
| H  | 0.54193100  | 3.22529900  | -0.81765000 |
| H  | 1.18331700  | 3.45564900  | 0.69019800  |
| H  | -0.42980800 | 3.74322400  | 0.43185200  |
| C  | 0.04003400  | 1.71128600  | 0.52043200  |
| H  | 0.00677400  | 1.63485700  | 1.60394700  |
| C  | -1.31429600 | 1.34455900  | -0.09151100 |
| C  | 1.17034300  | 0.84726200  | -0.02590800 |
| H  | -2.04649000 | 2.05368600  | 0.30172500  |
| H  | -1.26373300 | 1.48379200  | -1.17369400 |
| C  | -1.74281900 | -0.07676700 | 0.24207700  |
| O  | 1.80949400  | 1.19372600  | -1.01576500 |
| H  | -1.10581400 | -0.80528600 | -0.25784100 |
| H  | -1.68732600 | -0.25165100 | 1.31752400  |
| S  | -3.45927000 | -0.34113400 | -0.30787500 |
| C  | -3.62729400 | -2.09116800 | 0.12881400  |
| H  | -3.45996700 | -2.24059000 | 1.19550800  |
| H  | -4.64597000 | -2.39044100 | -0.11514600 |
| H  | -2.93030500 | -2.70353200 | -0.44310900 |
| O  | 1.34628300  | -0.25173300 | 0.62959800  |
| Cu | 2.63117000  | -1.43573800 | -0.02267000 |

Molecule: Cu-MET-02

|    |             |             |             |
|----|-------------|-------------|-------------|
| N  | 2.62156100  | -1.79963400 | -0.56281300 |
| H  | 2.84507800  | -2.02134000 | 0.41240000  |
| H  | 3.48684900  | -1.88994800 | -1.09857000 |
| H  | 1.94096700  | -2.46973600 | -0.92597800 |
| C  | 2.10879200  | -0.39531000 | -0.63085600 |
| H  | 2.10472500  | -0.10681700 | -1.67890600 |
| C  | 0.68980600  | -0.37187500 | -0.05656000 |
| C  | 3.06608900  | 0.51236800  | 0.16996500  |
| H  | 0.12917900  | -1.19128200 | -0.51703200 |
| H  | 0.73672700  | -0.55712300 | 1.01918400  |
| C  | -0.01403200 | 0.94366500  | -0.35257500 |
| O  | 3.76953500  | -0.04968500 | 1.04369800  |
| H  | 0.55051500  | 1.80169900  | 0.00961300  |
| H  | -0.21335100 | 1.06700900  | -1.41577300 |
| S  | -1.61521700 | 1.00679400  | 0.51850900  |
| C  | -2.60605800 | 2.03128600  | -0.58466100 |
| H  | -2.61277900 | 1.60849700  | -1.58653600 |
| H  | -3.61119900 | 2.07865700  | -0.17151800 |
| H  | -2.15892000 | 3.02542700  | -0.59211500 |
| O  | 3.02296800  | 1.73179800  | -0.10886800 |
| Cu | -2.39699500 | -1.19427700 | 0.11856100  |

Molecule: Cu-MET-011

|    |             |             |             |
|----|-------------|-------------|-------------|
| N  | 0.58180300  | 2.90467900  | 0.06677300  |
| H  | 0.82206400  | 2.88007300  | -0.92859200 |
| H  | 1.41597600  | 3.18722900  | 0.58737000  |
| H  | -0.14116500 | 3.61514600  | 0.20633600  |
| C  | 0.08325600  | 1.56994600  | 0.52361700  |
| H  | -0.07326000 | 1.63261100  | 1.59791100  |
| C  | -1.23026400 | 1.25546800  | -0.20035500 |
| C  | 1.14771900  | 0.54047600  | 0.23690700  |
| H  | -1.90158800 | 2.09675000  | -0.01526300 |
| H  | -1.03774500 | 1.21041200  | -1.27462400 |
| C  | -1.87607300 | -0.03332800 | 0.28520800  |
| O  | 1.96024000  | 0.68631900  | -0.71373500 |
| H  | -1.26653400 | -0.89965500 | 0.02998200  |
| H  | -2.00788800 | -0.00943400 | 1.36794400  |
| S  | -3.51108100 | -0.22141800 | -0.49678200 |
| C  | -4.03635600 | -1.75417400 | 0.31213500  |
| H  | -4.08090300 | -1.62364800 | 1.39323300  |
| H  | -5.03366300 | -1.98795300 | -0.05893100 |
| H  | -3.36370000 | -2.57579600 | 0.06673400  |
| O  | 1.21817100  | -0.51308600 | 0.94711400  |
| Cu | 2.71779700  | -1.21282700 | -0.14838300 |

Molecule: Cu-MET-032

|    |             |             |             |
|----|-------------|-------------|-------------|
| N  | 1.88251800  | -2.33951500 | -0.92664100 |
| H  | 2.01014400  | -2.92254600 | -0.09445900 |
| H  | 2.81122600  | -2.10227800 | -1.28232800 |
| H  | 1.38683900  | -2.87976600 | -1.63937800 |
| C  | 1.11128300  | -1.11090100 | -0.56456900 |
| H  | 1.10638700  | -0.46094300 | -1.43812400 |
| C  | -0.31654100 | -1.52632900 | -0.18746900 |
| C  | 1.85605000  | -0.44058400 | 0.59109500  |
| H  | -0.66063400 | -2.23240300 | -0.94662400 |
| H  | -0.29109400 | -2.05417000 | 0.76831900  |
| C  | -1.27914600 | -0.35132800 | -0.13271400 |
| O  | 2.52408300  | -1.13011500 | 1.35631800  |
| H  | -0.96900100 | 0.37654200  | 0.62091500  |
| H  | -1.31167800 | 0.14894100  | -1.10256700 |
| S  | -2.95885800 | -0.91624600 | 0.27958600  |
| C  | -3.82603500 | 0.66388600  | 0.09957600  |
| H  | -3.73759400 | 1.03761100  | -0.92048200 |
| H  | -4.87730900 | 0.48529200  | 0.32234000  |
| H  | -3.43544600 | 1.40255800  | 0.79949600  |
| O  | 1.73984600  | 0.83770700  | 0.73379600  |
| Cu | 0.78438500  | 2.04029300  | -0.29760100 |

## Molecule:Fe-MET-011

|    |             |             |             |
|----|-------------|-------------|-------------|
| N  | 0.67632900  | 2.87529200  | 0.08786800  |
| H  | 0.88272200  | 2.87988200  | -0.91539200 |
| H  | 1.53712500  | 3.11357600  | 0.58712700  |
| H  | -0.01905400 | 3.60157900  | 0.27969700  |
| C  | 0.15938600  | 1.54173800  | 0.51868200  |
| H  | 0.01696900  | 1.58285800  | 1.59622400  |
| C  | -1.17241000 | 1.27534200  | -0.19014300 |
| C  | 1.19696700  | 0.48893700  | 0.20842700  |
| H  | -1.83455500 | 2.10992300  | 0.04615000  |
| H  | -1.00262900 | 1.27103900  | -1.26859600 |
| C  | -1.80721500 | -0.03161200 | 0.26101800  |
| O  | 2.08697800  | 0.67797000  | -0.66070600 |
| H  | -1.19815600 | -0.89884400 | -0.00666700 |
| H  | -1.96500200 | -0.05331300 | 1.34137200  |
| S  | -3.41209200 | -0.24492000 | -0.52978800 |
| C  | -4.03039800 | -1.67483700 | 0.35265000  |
| H  | -4.11990200 | -1.44024700 | 1.41437200  |
| H  | -5.00633800 | -1.91764900 | -0.06244200 |
| H  | -3.34444800 | -2.51269900 | 0.21821200  |
| O  | 1.15783900  | -0.61581000 | 0.83703800  |
| Fe | 2.84138100  | -1.30919700 | -0.14165400 |

## Molecule:Hg-MET-02

|    |             |             |             |
|----|-------------|-------------|-------------|
| N  | 3.25443600  | -2.02571500 | -0.41185600 |
| H  | 3.54248800  | -2.16967200 | 0.56194100  |
| H  | 4.04475300  | -2.29278700 | -1.00134500 |
| H  | 2.46056500  | -2.62754500 | -0.63870500 |
| C  | 2.93280200  | -0.57564100 | -0.58979700 |
| H  | 2.92500900  | -0.37319500 | -1.65779400 |
| C  | 1.55728700  | -0.30570400 | 0.02365000  |
| C  | 4.03958800  | 0.24906100  | 0.10498400  |
| H  | 0.85114100  | -1.05191600 | -0.35553700 |
| H  | 1.61995700  | -0.42637700 | 1.10775100  |
| C  | 1.05010100  | 1.07671000  | -0.34571500 |
| O  | 4.68666800  | -0.33716800 | 1.00662500  |
| H  | 1.74449100  | 1.86075100  | -0.04361900 |
| H  | 0.84574800  | 1.16509200  | -1.41067500 |
| S  | -0.48661100 | 1.46921500  | 0.55029200  |
| C  | -1.19865500 | 2.76130300  | -0.49408000 |
| H  | -1.26699400 | 2.42355600  | -1.52347800 |
| H  | -2.18130800 | 2.99420400  | -0.09042700 |
| H  | -0.54201700 | 3.62614200  | -0.40660900 |
| O  | 4.15931600  | 1.43518000  | -0.27463200 |
| Hg | -1.87617100 | -0.50592700 | 0.01858300  |

## Molecule:Fe-MET-023

|    |             |             |             |
|----|-------------|-------------|-------------|
| N  | -2.83533900 | -1.89249400 | -0.10660800 |
| H  | -3.28895500 | -1.63697000 | -0.99096800 |
| H  | -3.57144300 | -2.18691900 | 0.53758100  |
| H  | -2.19675700 | -2.67700300 | -0.25144400 |
| C  | -2.13256900 | -0.67553100 | 0.41255600  |
| H  | -1.97013900 | -0.82284500 | 1.47704700  |
| C  | -0.79874900 | -0.53865000 | -0.32334600 |
| C  | -3.05563800 | 0.54151800  | 0.18289700  |
| H  | -0.24021900 | -1.46846300 | -0.18884500 |
| H  | -0.99179700 | -0.41552500 | -1.39163700 |
| C  | 0.02053500  | 0.63025200  | 0.20011000  |
| O  | -3.90218200 | 0.43710500  | -0.73900000 |
| H  | -0.47693800 | 1.58360400  | 0.03279800  |
| H  | 0.24627000  | 0.53109600  | 1.26106200  |
| S  | 1.59371000  | 0.73355300  | -0.71065700 |
| C  | 2.35910200  | 2.16153100  | 0.09237400  |
| H  | 2.38649900  | 2.01450900  | 1.16991600  |
| H  | 3.36724800  | 2.25404000  | -0.30670900 |
| H  | 1.77822000  | 3.04704800  | -0.16036900 |
| O  | -2.85083300 | 1.53044100  | 0.92168900  |
| Fe | 2.88361800  | -1.04488700 | 0.23381800  |

## Molecule:Hg-MET-03

|    |             |             |             |
|----|-------------|-------------|-------------|
| N  | 0.58607300  | 3.34683600  | -1.02210000 |
| H  | 1.01055200  | 3.91325000  | -0.28166100 |
| H  | -0.33058100 | 3.74757600  | -1.23199900 |
| H  | 1.16716100  | 3.40236700  | -1.86190600 |
| C  | 0.46112500  | 1.93002600  | -0.55873400 |
| H  | -0.10275900 | 1.39156600  | -1.31724100 |
| C  | 1.86744600  | 1.34387000  | -0.41185800 |
| C  | -0.30822200 | 1.95037700  | 0.76513100  |
| H  | 2.37179900  | 1.47035500  | -1.37259100 |
| H  | 2.41516600  | 1.92753100  | 0.33166600  |
| C  | 1.86135400  | -0.12532100 | -0.02458100 |
| O  | -0.19102700 | 2.92910200  | 1.50054800  |
| H  | 1.46973900  | -0.26341100 | 0.98228700  |
| H  | 1.24027900  | -0.69976200 | -0.72035600 |
| S  | 3.54807200  | -0.80592900 | -0.07833000 |
| C  | 3.18446800  | -2.46885900 | 0.54145700  |
| H  | 2.45979300  | -2.96796400 | -0.10211800 |
| H  | 4.11692500  | -3.03193000 | 0.52852400  |
| H  | 2.80580400  | -2.42828800 | 1.56245700  |
| O  | -1.03823500 | 0.93506300  | 1.09387100  |
| Hg | -1.40073100 | -0.79610200 | -0.13416200 |

## Molecule:Fe-MET-32

|    |             |             |             |
|----|-------------|-------------|-------------|
| N  | 2.04976300  | -2.25621100 | -0.82780800 |
| H  | 2.15067900  | -2.82369400 | 0.01923700  |
| H  | 2.98681000  | -1.97500200 | -1.12583600 |
| H  | 1.63375800  | -2.83116800 | -1.56461600 |
| C  | 1.19389900  | -1.06547200 | -0.53985900 |
| H  | 1.22801400  | -0.42204900 | -1.41693800 |
| C  | -0.23297200 | -1.55947700 | -0.28198000 |
| C  | 1.80216300  | -0.34157900 | 0.66783400  |
| H  | -0.54932700 | -2.11227400 | -1.16919700 |
| H  | -0.22626200 | -2.24984700 | 0.56334400  |
| C  | -1.18605600 | -0.40885300 | -0.01440500 |
| O  | 2.39655900  | -0.98826800 | 1.51937300  |
| H  | -1.00391900 | 0.06925400  | 0.94942500  |
| H  | -1.08355900 | 0.36738500  | -0.79199200 |
| S  | -2.90391000 | -0.91628600 | -0.05739200 |
| C  | -3.68559900 | 0.59231200  | 0.51538700  |
| H  | -3.43927300 | 1.40876500  | -0.16580100 |
| H  | -4.76036100 | 0.42544700  | 0.52466100  |
| H  | -3.32889000 | 0.82983600  | 1.51851800  |
| O  | 1.63772400  | 0.94296900  | 0.73243700  |
| Fe | 0.72629500  | 2.18570000  | -0.41247000 |

## Molecule:Hg-MET-011

|    |             |             |             |
|----|-------------|-------------|-------------|
| N  | -1.52727700 | 3.37512600  | 0.14104000  |
| H  | -1.31828200 | 3.48468900  | -0.85555400 |
| H  | -0.84386700 | 3.92798300  | 0.66338500  |
| H  | -2.46118300 | 3.74717100  | 0.32715900  |
| C  | -1.45397500 | 1.93016500  | 0.52083800  |
| H  | -1.56047100 | 1.87481200  | 1.60072900  |
| C  | -2.58625800 | 1.17495200  | -0.18193100 |
| C  | -0.08208300 | 1.40888900  | 0.09226500  |
| H  | -3.50742200 | 1.73648200  | -0.01057200 |
| H  | -2.39552200 | 1.17316400  | -1.25770400 |
| C  | -2.75922600 | -0.24375700 | 0.33840800  |
| O  | 0.51847000  | 1.94677400  | -0.83300100 |
| H  | -1.86226100 | -0.83825800 | 0.17279600  |
| H  | -2.97238200 | -0.23031700 | 1.40830100  |
| S  | -4.15187300 | -1.04132800 | -0.52565300 |
| C  | -4.16278400 | -2.62459300 | 0.35369700  |
| H  | -4.37847600 | -2.47928200 | 1.41216000  |
| H  | -4.94968700 | -3.23415500 | -0.08911300 |
| H  | -3.20884700 | -3.13936000 | 0.23970300  |
| O  | 0.30132900  | 0.37451100  | 0.76068800  |
| Hg | 2.07858600  | -0.51789700 | -0.02936600 |

|                    |             |             |             |                    |             |             |             |                    |             |             |             |
|--------------------|-------------|-------------|-------------|--------------------|-------------|-------------|-------------|--------------------|-------------|-------------|-------------|
| Molecule:Mn-MET-11 |             |             |             | Molecule:Mn-MET-21 |             |             |             | Molecule:Mn-MET-31 |             |             |             |
| N                  | 0.40391000  | 3.05590400  | 0.13621800  | N                  | -2.49762200 | -1.87627600 | 0.48145300  | N                  | 2.65665400  | -2.11896400 | -0.28035300 |
| H                  | 0.67248200  | 3.06539100  | -0.85235600 | H                  | -2.75864500 | -2.03825100 | -0.49686500 | H                  | 2.83234100  | -2.15249700 | 0.72870100  |
| H                  | 1.19944800  | 3.39906500  | 0.67823500  | H                  | -3.33511400 | -2.02283900 | 1.04796400  | H                  | 3.52692000  | -1.84770800 | -0.74230600 |
| H                  | -0.38458100 | 3.69047000  | 0.27921500  | H                  | -1.78501400 | -2.54861600 | 0.77134800  | H                  | 2.39460300  | -3.05207100 | -0.60618300 |
| C                  | 0.04947400  | 1.65639900  | 0.53423700  | C                  | -2.01648000 | -0.46399900 | 0.61003900  | C                  | 1.57171700  | -1.12300500 | -0.55158600 |
| H                  | -0.03717800 | 1.64183400  | 1.61714700  | H                  | -1.99859400 | -0.22601500 | 1.67046800  | H                  | 1.56781700  | -0.93301300 | -1.62091000 |
| C                  | -1.27896000 | 1.28462700  | -0.12621700 | C                  | -0.61431400 | -0.36625500 | 0.00643700  | C                  | 0.24180500  | -1.72896400 | -0.09791700 |
| C                  | 1.18929600  | 0.74430300  | 0.07882300  | C                  | -3.01892700 | 0.44722500  | -0.13068900 | C                  | 1.91122500  | 0.16917300  | 0.20865200  |
| H                  | -2.01618100 | 2.03632300  | 0.16610800  | H                  | -0.00828800 | -1.18993700 | 0.39889000  | H                  | 0.03415400  | -2.58830800 | -0.73995800 |
| H                  | -1.15960200 | 1.34125800  | -1.21095300 | H                  | -0.68444500 | -0.49701500 | -1.07637000 | H                  | 0.35137600  | -2.09536800 | 0.92535700  |
| C                  | -1.76490600 | -0.09765200 | 0.28179300  | C                  | 0.05656800  | 0.95380400  | 0.35210700  | C                  | -0.90335100 | -0.73198100 | -0.16246200 |
| O                  | 1.80708700  | 1.04998300  | -0.95699000 | O                  | -3.64477000 | -0.07915600 | -1.08430000 | O                  | 2.44014100  | 0.06115700  | 1.32469300  |
| H                  | -1.08918200 | -0.87242900 | -0.07905200 | H                  | -0.56976800 | 1.80343800  | 0.09163400  | H                  | -0.78830000 | 0.02125200  | 0.61810500  |
| H                  | -1.82956500 | -0.17505200 | 1.36813600  | H                  | 0.29292200  | 1.00029500  | 1.41400900  | H                  | -0.93160500 | -0.23110400 | -1.13138300 |
| S                  | -3.41831000 | -0.39867300 | -0.42310000 | S                  | 1.62004800  | 1.12029400  | -0.57551100 | S                  | -2.50098600 | -1.55505000 | 0.11739100  |
| C                  | -3.71416000 | -2.05408100 | 0.24966400  | C                  | 2.57334400  | 2.19196700  | 0.53203800  | C                  | -3.54202800 | -0.07333500 | 0.17341500  |
| H                  | -3.70873100 | -2.03416800 | 1.33947300  | H                  | 2.66710200  | 1.73871000  | 1.51613800  | H                  | -3.48210600 | 0.47545100  | -0.76657800 |
| H                  | -4.69721000 | -2.37430400 | -0.09396100 | H                  | 3.55885600  | 2.31566300  | 0.08645600  | H                  | -4.56957900 | -0.39932600 | 0.32911200  |
| H                  | -2.96583400 | -2.76005500 | -0.11029800 | H                  | 2.08214200  | 3.16059600  | 0.60307500  | H                  | -3.24531900 | 0.57573500  | 0.99781400  |
| O                  | 1.40097800  | -0.28802800 | 0.79052800  | O                  | -3.08931600 | 1.63213100  | 0.26478200  | O                  | 1.60420700  | 1.25143500  | -0.38416000 |
| Mn                 | 3.01331000  | -1.49072500 | -0.08254900 | Mn                 | 2.64371900  | -1.41148200 | -0.07408800 | Mn                 | -0.17208400 | 2.49473700  | -0.11409700 |

  

|                    |             |             |             |                    |             |             |             |
|--------------------|-------------|-------------|-------------|--------------------|-------------|-------------|-------------|
| Molecule:Ni-MET-01 |             |             |             | Molecule:Ni-MET-32 |             |             |             |
| N                  | 0.40391000  | 3.05590400  | 0.13621800  | N                  | 0.66241900  | 2.85129800  | 0.04763400  |
| H                  | 0.67248200  | 3.06539100  | -0.85235600 | H                  | 0.89160900  | 2.81178400  | -0.95005600 |
| H                  | 1.19944800  | 3.39906500  | 0.67823500  | H                  | 1.50788700  | 3.11906100  | 0.55830800  |
| H                  | -0.38458100 | 3.69047000  | 0.27921500  | H                  | -0.04172600 | 3.58102600  | 0.18597700  |
| C                  | 0.04947400  | 1.65639900  | 0.53423700  | C                  | 0.13157500  | 1.53718900  | 0.52480300  |
| H                  | -0.03717800 | 1.64183400  | 1.61714700  | H                  | -0.02045700 | 1.61803300  | 1.59836300  |
| C                  | -1.27896000 | 1.28462700  | -0.12621700 | C                  | -1.19042400 | 1.24596900  | -0.19282100 |
| C                  | 1.18929600  | 0.74430300  | 0.07882300  | C                  | 1.16308200  | 0.47303000  | 0.25873800  |
| H                  | -2.01618100 | 2.03632300  | 0.16610800  | H                  | -1.84388800 | 2.09894000  | 0.00201300  |
| H                  | -1.15960200 | 1.34125800  | -1.21095300 | H                  | -1.00483300 | 1.20350400  | -1.26825800 |
| C                  | -1.76490600 | -0.09765200 | 0.28179300  | C                  | -1.85696200 | -0.03424500 | 0.28838300  |
| O                  | 1.80708700  | 1.04998300  | -0.95699000 | O                  | 1.96660000  | 0.56712800  | -0.71923700 |
| H                  | -1.08918200 | -0.87242900 | -0.07905200 | H                  | -1.27014900 | -0.91089100 | 0.01460300  |
| H                  | -1.82956500 | -0.17505200 | 1.36813600  | H                  | -1.97483600 | -0.02042100 | 1.37283100  |
| S                  | -3.41831000 | -0.39867300 | -0.42310000 | S                  | -3.50313600 | -0.17261500 | -0.47923400 |
| C                  | -3.71416000 | -2.05408100 | 0.24966400  | C                  | -4.04461300 | -1.72545700 | 0.27840200  |
| H                  | -3.70873100 | -2.03416800 | 1.33947300  | H                  | -4.07359200 | -1.63658400 | 1.36425100  |
| H                  | -4.69721000 | -2.37430400 | -0.09396100 | H                  | -5.05053000 | -1.92683900 | -0.08850200 |
| H                  | -2.96583400 | -2.76005500 | -0.11029800 | H                  | -3.39013200 | -2.54875700 | -0.00738100 |
| O                  | 1.40097800  | -0.28802800 | 0.79052800  | O                  | 1.23135500  | -0.55713800 | 0.99315100  |
| Mn                 | 3.01331000  | -1.49072500 | -0.08254900 | Ni                 | 2.74586800  | -1.20160500 | -0.16372100 |

## Molecule:Zn-MET-01

|    |             |             |             |
|----|-------------|-------------|-------------|
| N  | 0.49419600  | 2.91376800  | 0.04165700  |
| H  | 0.74988100  | 2.86889400  | -0.94856600 |
| H  | 1.32079000  | 3.20958200  | 0.56557800  |
| H  | -0.23435800 | 3.62193900  | 0.15906800  |
| C  | 0.00491100  | 1.58080000  | 0.51542400  |
| H  | -0.17590500 | 1.66890100  | 1.58421100  |
| C  | -1.29376400 | 1.24163700  | -0.22434300 |
| C  | 1.09122300  | 0.55013700  | 0.27849000  |
| H  | -1.97342100 | 2.08393800  | -0.07555500 |
| H  | -1.08340200 | 1.16901200  | -1.29394600 |
| C  | -1.94420200 | -0.03688500 | 0.28190000  |
| O  | 1.98146700  | 0.77122400  | -0.59091800 |
| H  | -1.33583100 | -0.90693900 | 0.04088100  |
| H  | -2.07408800 | 0.00373300  | 1.36447200  |
| S  | -3.58058400 | -0.24708500 | -0.49283500 |
| C  | -4.05378200 | -1.81020400 | 0.29045500  |
| H  | -4.08817500 | -1.70328100 | 1.37459200  |
| H  | -5.04802200 | -2.06789100 | -0.07275100 |
| H  | -3.35964700 | -2.60618600 | 0.02115900  |
| O  | 1.05855700  | -0.52566900 | 0.93343700  |
| Zn | 2.79952100  | -1.16340300 | -0.15723600 |

## Molecule:Zn-MET-23

|    |             |             |             |
|----|-------------|-------------|-------------|
| N  | 3.00319800  | -0.86434600 | -1.31903400 |
| H  | 2.86083600  | -1.68505400 | -0.72045600 |
| H  | 4.00738600  | -0.67970600 | -1.35511200 |
| H  | 2.67383000  | -1.06054300 | -2.26643100 |
| C  | 2.27508700  | 0.28903200  | -0.70005000 |
| H  | 2.65142100  | 1.19804600  | -1.16046500 |
| C  | 0.78240400  | 0.10800500  | -0.97774500 |
| C  | 2.57707200  | 0.28459400  | 0.81373700  |
| H  | 0.63177100  | 0.07110200  | -2.05896700 |
| H  | 0.47833500  | -0.86130600 | -0.56895800 |
| C  | -0.05980700 | 1.21674300  | -0.36829100 |
| O  | 2.78368900  | -0.84041400 | 1.33302200  |
| H  | 0.04710800  | 1.26074100  | 0.71215600  |
| H  | 0.18855700  | 2.18902000  | -0.79291400 |
| S  | -1.82751700 | 0.91769700  | -0.72489800 |
| C  | -2.62009300 | 1.97820600  | 0.50993100  |
| H  | -2.38970000 | 3.01256600  | 0.26047800  |
| H  | -3.69245900 | 1.81093500  | 0.43338900  |
| H  | -2.26738600 | 1.73447000  | 1.50800200  |
| O  | 2.54870900  | 1.39642900  | 1.38631700  |
| Zn | -1.91196600 | -1.44435300 | 0.31402300  |

## Molecule:Zn-MET-32

|    |             |             |             |
|----|-------------|-------------|-------------|
| N  | 1.84758000  | -2.37458400 | -0.95346300 |
| H  | 1.99211600  | -2.94955500 | -0.11781400 |
| H  | 2.76938900  | -2.14130700 | -1.32784100 |
| H  | 1.33623300  | -2.91579900 | -1.65376300 |
| C  | 1.09520000  | -1.13992100 | -0.57008900 |
| H  | 1.13700500  | -0.45688800 | -1.41640400 |
| C  | -0.35056500 | -1.53263000 | -0.25282600 |
| C  | 1.81023600  | -0.53450600 | 0.64228600  |
| H  | -0.69996100 | -2.18244300 | -1.05852500 |
| H  | -0.36172300 | -2.11738500 | 0.67010200  |
| C  | -1.28165400 | -0.33639400 | -0.13769800 |
| O  | 2.44239200  | -1.28727200 | 1.38805500  |
| H  | -0.97079700 | 0.32980500  | 0.66768700  |
| H  | -1.28858500 | 0.22823000  | -1.07247300 |
| S  | -2.97548400 | -0.91091300 | 0.20899300  |
| C  | -3.82726800 | 0.68668100  | 0.19809400  |
| H  | -3.74257900 | 1.16353500  | -0.77828800 |
| H  | -4.87873200 | 0.49393400  | 0.40877700  |
| H  | -3.42670100 | 1.34691500  | 0.96719900  |
| O  | 1.68815200  | 0.72507200  | 0.84252400  |
| Zn | 0.83629900  | 2.06786300  | -0.30271800 |

## Molecule: Cd-PRO-02

|    |             |             |             |
|----|-------------|-------------|-------------|
| N  | -2.68906400 | 0.41667500  | 0.68304900  |
| H  | -2.88686900 | 1.36200000  | 0.33417200  |
| H  | -2.88150200 | 0.39122700  | 1.68337000  |
| C  | -3.50012900 | -0.63564900 | -0.04258200 |
| C  | -1.22473200 | 0.14794000  | 0.42714900  |
| H  | -3.82250900 | -0.19516300 | -0.98239500 |
| H  | -4.36582900 | -0.88918100 | 0.56097700  |
| C  | -2.51128400 | -1.76792700 | -0.26163500 |
| C  | -1.20923700 | -1.02882900 | -0.56018200 |
| H  | -0.77066500 | -0.13014500 | 1.37516900  |
| C  | -0.55207400 | 1.40815100  | -0.10972300 |
| H  | -2.82292000 | -2.41710900 | -1.07726400 |
| H  | -2.41283400 | -2.36743300 | 0.64483000  |
| H  | -1.21163800 | -0.65497100 | -1.58526000 |
| H  | -0.32003200 | -1.64094200 | -0.41728800 |
| O  | -1.25368000 | 2.39104500  | -0.37852100 |
| O  | 0.71913700  | 1.37502700  | -0.27415600 |
| Cd | 2.05373600  | -0.31761900 | 0.06636700  |

## Molecule: Cu-PRO-01

|    |             |             |             |
|----|-------------|-------------|-------------|
| N  | 1.87598800  | -1.07393400 | 0.47127500  |
| H  | 1.25844500  | -1.77156300 | 0.04905700  |
| H  | 2.14380600  | -1.41372200 | 1.39495500  |
| C  | 3.10543700  | -0.83964500 | -0.38740200 |
| C  | 1.15025200  | 0.24638500  | 0.61400600  |
| H  | 2.85174500  | -1.16349200 | -1.39308300 |
| H  | 3.91821900  | -1.44361400 | 0.00250100  |
| C  | 3.32047700  | 0.66128400  | -0.31208100 |
| C  | 1.89808900  | 1.21692500  | -0.31219800 |
| H  | 1.23898000  | 0.55625100  | 1.65278600  |
| C  | -0.30464100 | 0.10087600  | 0.28815700  |
| H  | 3.90969500  | 1.01885400  | -1.15356900 |
| H  | 3.83390100  | 0.92656700  | 0.61345900  |
| H  | 1.47172600  | 1.17854700  | -1.31546400 |
| H  | 1.82574200  | 2.23385000  | 0.06292800  |
| O  | -0.79023700 | -0.97946400 | -0.16122000 |
| O  | -1.08346100 | 1.08576000  | 0.46057400  |
| Cu | -2.60732000 | -0.06101500 | -0.17069700 |

## Molecule: Cd-PRO-011

|    |             |             |             |
|----|-------------|-------------|-------------|
| N  | 2.46287500  | -1.03421500 | 0.55079700  |
| H  | 1.78346600  | -1.72474900 | 0.21874800  |
| H  | 2.78311100  | -1.31793900 | 1.47615800  |
| C  | 3.63176800  | -0.90659300 | -0.40346000 |
| C  | 1.77252000  | 0.31259300  | 0.64120500  |
| H  | 3.29909000  | -1.29101800 | -1.36404600 |
| H  | 4.45286300  | -1.51003100 | -0.03021900 |
| C  | 3.89607700  | 0.58780300  | -0.45348800 |
| C  | 2.49386000  | 1.19184400  | -0.39156400 |
| H  | 1.92369900  | 0.68888000  | 1.64910800  |
| C  | 0.28979900  | 0.16500600  | 0.37557600  |
| H  | 4.43256400  | 0.86498200  | -1.35854000 |
| H  | 4.48562100  | 0.89765900  | 0.41078400  |
| H  | 2.00160900  | 1.10694600  | -1.36142100 |
| H  | 2.48217500  | 2.23365500  | -0.08359200 |
| O  | -0.14347000 | -0.92719200 | -0.08262300 |
| O  | -0.44868000 | 1.16010700  | 0.59724500  |
| Cd | -2.34690100 | -0.05575200 | -0.12789900 |

## Molecule: Cu-PRO-021

|    |             |             |             |
|----|-------------|-------------|-------------|
| N  | -2.20691000 | 0.57088100  | 0.63241900  |
| H  | -2.27230000 | 1.54068600  | 0.30348100  |
| H  | -2.48989000 | 0.53499800  | 1.61082600  |
| C  | -3.05729700 | -0.36268400 | -0.19428300 |
| C  | -0.76660700 | 0.13343900  | 0.49707600  |
| H  | -3.14920600 | 0.08286500  | -1.18194700 |
| H  | -4.03684600 | -0.44650400 | 0.26564700  |
| C  | -2.24155700 | -1.64148800 | -0.22681400 |
| C  | -0.80837200 | -1.13150000 | -0.38017900 |
| H  | -0.39466800 | -0.08907400 | 1.49455000  |
| C  | 0.05167100  | 1.27243400  | -0.09080700 |
| H  | -2.54571900 | -2.28773200 | -1.04747000 |
| H  | -2.35972200 | -2.18733800 | 0.71056100  |
| H  | -0.61019800 | -0.86937400 | -1.41986300 |
| H  | -0.05800700 | -1.84916000 | -0.05568400 |
| O  | -0.49300400 | 2.33566100  | -0.38148300 |
| O  | 1.31300500  | 1.05226100  | -0.26482800 |
| Cu | 2.33578900  | -0.52241700 | 0.08391400  |

## Molecule: Cd-PRO-032

|    |             |             |             |
|----|-------------|-------------|-------------|
| N  | 1.58945300  | -0.33049700 | 1.21892600  |
| H  | 0.73288000  | -0.11860100 | 1.73520300  |
| H  | 2.38261100  | -0.23148600 | 1.85088700  |
| C  | 1.53586600  | -1.73084000 | 0.65083900  |
| C  | 1.73578700  | 0.64925900  | 0.06682300  |
| H  | 0.48444700  | -2.00642800 | 0.58159400  |
| H  | 2.04182400  | -2.40496700 | 1.33493900  |
| C  | 2.18075200  | -1.58990700 | -0.71434900 |
| C  | 1.68934900  | -0.22536800 | -1.19364400 |
| H  | 2.70551700  | 1.12383100  | 0.17620100  |
| C  | 0.64872100  | 1.71739300  | 0.10274800  |
| H  | 1.88817600  | -2.40015100 | -1.37881200 |
| H  | 3.26788600  | -1.59200500 | -0.62064800 |
| H  | 0.66331500  | -0.30302400 | -1.56179300 |
| H  | 2.30144500  | 0.20446200  | -1.98218600 |
| O  | -0.49392900 | 1.38741400  | 0.60235700  |
| O  | 0.91684100  | 2.83131400  | -0.34686500 |
| Cd | -1.61917500 | -0.34648300 | -0.08721500 |

## Molecule: Cu-PRO-032

|    |             |             |             |
|----|-------------|-------------|-------------|
| N  | 1.35706000  | 0.00178200  | 1.21833000  |
| H  | 0.49025300  | -0.18156300 | 1.72796500  |
| H  | 2.03793300  | 0.39005600  | 1.86955500  |
| C  | 1.88354900  | -1.27655000 | 0.59622100  |
| C  | 1.09434900  | 0.99853000  | 0.10299500  |
| H  | 1.03639100  | -1.95277500 | 0.50554500  |
| H  | 2.62893900  | -1.70554400 | 1.25806300  |
| C  | 2.39363600  | -0.83236600 | -0.76122900 |
| C  | 1.35940300  | 0.20668400  | -1.18714800 |
| H  | 1.79802400  | 1.81572000  | 0.22382900  |
| C  | -0.32765200 | 1.52983100  | 0.14002800  |
| H  | 2.46035700  | -1.66885300 | -1.45360700 |
| H  | 3.38023800  | -0.37571100 | -0.66718000 |
| H  | 0.43924100  | -0.28899000 | -1.50950000 |
| H  | 1.69766900  | 0.86812000  | -1.98014200 |
| O  | -1.21322300 | 0.70868000  | 0.62769000  |
| O  | -0.58213300 | 2.63716300  | -0.30771900 |
| Cu | -1.70777000 | -0.94608400 | -0.15199300 |



## Molecule: Fe-PRO-01

|    |             |             |             |
|----|-------------|-------------|-------------|
| N  | 1.83503100  | -1.12017100 | 0.34379700  |
| H  | 1.31853100  | -1.76644900 | -0.25671400 |
| H  | 1.97972800  | -1.58407000 | 1.24093400  |
| C  | 3.17101900  | -0.75642000 | -0.30299700 |
| C  | 1.06998800  | 0.16114200  | 0.54905300  |
| H  | 3.12118100  | -1.10480800 | -1.33005700 |
| H  | 3.95824600  | -1.27842600 | 0.23012700  |
| C  | 3.23646800  | 0.75992200  | -0.21613600 |
| C  | 1.77843100  | 1.19108900  | -0.34172200 |
| H  | 1.17264700  | 0.43977400  | 1.59716800  |
| C  | -0.38308400 | 0.02834800  | 0.26187400  |
| H  | 3.86069300  | 1.17123200  | -1.00611000 |
| H  | 3.63879500  | 1.07169900  | 0.74829100  |
| H  | 1.42828800  | 1.09530800  | -1.37061900 |
| H  | 1.58407600  | 2.19974400  | 0.01104900  |
| O  | -0.94059200 | -1.01375900 | -0.19979600 |
| O  | -1.15349000 | 1.02294200  | 0.47832200  |
| Fe | -2.74583400 | -0.03002900 | -0.16151100 |

## Molecule: Fe-PRO-022

|    |             |             |             |
|----|-------------|-------------|-------------|
| N  | -2.12262900 | 0.63280400  | 0.62463000  |
| H  | -2.21335900 | 1.57701200  | 0.23886800  |
| H  | -2.33669400 | 0.67923200  | 1.62066900  |
| C  | -3.05486700 | -0.34493900 | -0.06973700 |
| C  | -0.71017300 | 0.14263100  | 0.43428500  |
| H  | -3.31043500 | 0.09199300  | -1.03094600 |
| H  | -3.94759100 | -0.45895000 | 0.53612600  |
| C  | -2.21555400 | -1.60190200 | -0.22317900 |
| C  | -0.82469700 | -1.05184600 | -0.52410700 |
| H  | -0.33273500 | -0.16984400 | 1.40599400  |
| C  | 0.16861800  | 1.24517700  | -0.10260700 |
| H  | -2.59537300 | -2.23635000 | -1.02082000 |
| H  | -2.20854500 | -2.17251400 | 0.70648100  |
| H  | -0.76340200 | -0.70778000 | -1.55728500 |
| H  | -0.01979600 | -1.76325000 | -0.34484900 |
| O  | -0.23871200 | 2.34575800  | -0.39542000 |
| O  | 1.44297700  | 0.90692200  | -0.26645700 |
| Fe | 2.41431800  | -0.60097500 | 0.12617100  |

## Molecule: Fe-PRO-031

|    |             |             |             |
|----|-------------|-------------|-------------|
| N  | 1.33068500  | 0.12697800  | 1.21075800  |
| H  | 0.53087400  | -0.04597500 | 1.82133300  |
| H  | 2.05521700  | 0.58366600  | 1.76621200  |
| C  | 1.86086700  | -1.16956000 | 0.63579300  |
| C  | 0.97036700  | 1.03728800  | 0.04939300  |
| H  | 1.01512600  | -1.85110100 | 0.56599600  |
| H  | 2.60691400  | -1.57160900 | 1.31368200  |
| C  | 2.36648200  | -0.76458500 | -0.73291100 |
| C  | 1.29280300  | 0.21069300  | -1.20929800 |
| H  | 1.60421800  | 1.91515600  | 0.11839300  |
| C  | -0.47396000 | 1.48764200  | 0.09384100  |
| H  | 2.46676500  | -1.62469000 | -1.39091100 |
| H  | 3.33375200  | -0.26654000 | -0.65254200 |
| H  | 0.41859400  | -0.34888600 | -1.54860500 |
| H  | 1.61105400  | 0.86303900  | -2.01784700 |
| O  | -1.35225600 | 0.56469700  | 0.52242100  |
| O  | -0.82751200 | 2.58463100  | -0.25294600 |
| Fe | -1.67763500 | -1.09790000 | -0.13952800 |

## Molecule: Hg-PRO-01

|    |             |             |             |
|----|-------------|-------------|-------------|
| N  | 3.35768700  | -1.03265900 | 0.36000600  |
| H  | 2.87593700  | -1.79276400 | -0.13010200 |
| H  | 3.72674800  | -1.40108700 | 1.23607900  |
| C  | 4.47353000  | -0.44651100 | -0.48331000 |
| C  | 2.35634300  | 0.06306000  | 0.64560600  |
| H  | 4.26684200  | -0.72084900 | -1.51438100 |
| H  | 5.41503800  | -0.88361500 | -0.16700300 |
| C  | 4.34920300  | 1.05106600  | -0.26204800 |
| C  | 2.83977100  | 1.26451100  | -0.17883300 |
| H  | 2.39477600  | 0.27435100  | 1.71042700  |
| C  | 0.95768900  | -0.39699700 | 0.26201800  |
| H  | 4.80800400  | 1.60969000  | -1.07525100 |
| H  | 4.82910700  | 1.33922400  | 0.67447000  |
| H  | 2.39618800  | 1.23295600  | -1.17547000 |
| H  | 2.55563100  | 2.19774600  | 0.29946000  |
| O  | 0.77555000  | -1.44473400 | -0.34958300 |
| O  | 0.06182200  | 0.45717900  | 0.62713600  |
| Hg | -1.91662800 | 0.05078300  | -0.05624100 |

## Molecule: Hg-PRO-012

|    |             |             |             |
|----|-------------|-------------|-------------|
| N  | 2.99677700  | -1.01918500 | 0.58828300  |
| H  | 2.31366200  | -1.71792600 | 0.28521600  |
| H  | 3.31708400  | -1.27113300 | 1.52297600  |
| C  | 4.16390100  | -0.94472800 | -0.37642600 |
| C  | 2.32971700  | 0.34146600  | 0.63148600  |
| H  | 3.82546000  | -1.37725000 | -1.31403100 |
| H  | 4.98383900  | -1.53102200 | 0.02533100  |
| C  | 4.43475100  | 0.54343500  | -0.50554100 |
| C  | 3.03670700  | 1.15804600  | -0.46018000 |
| H  | 2.51395800  | 0.76167600  | 1.61580500  |
| C  | 0.83626700  | 0.22461500  | 0.41135700  |
| H  | 4.96231200  | 0.76944400  | -1.42982100 |
| H  | 5.03506800  | 0.89529500  | 0.33475900  |
| H  | 2.52915300  | 1.02034400  | -1.41600500 |
| H  | 3.03223900  | 2.21530500  | -0.20996000 |
| O  | 0.37519000  | -0.85813100 | -0.05050900 |
| O  | 0.12778600  | 1.22443400  | 0.66933800  |
| Hg | -1.82902600 | -0.04372300 | -0.08358800 |

## Molecule: Hg-PRO-021

|    |             |             |             |
|----|-------------|-------------|-------------|
| N  | -3.12659500 | 0.38945300  | 0.69570700  |
| H  | -3.35980500 | 1.33160800  | 0.36211400  |
| H  | -3.30190200 | 0.34957100  | 1.69898900  |
| C  | -3.92485900 | -0.67569500 | -0.02769200 |
| C  | -1.66219200 | 0.15335000  | 0.41742300  |
| H  | -4.26990000 | -0.23402600 | -0.95878200 |
| H  | -4.77542300 | -0.95286200 | 0.58675900  |
| C  | -2.91403500 | -1.78362900 | -0.27043100 |
| C  | -1.63303800 | -1.01418800 | -0.58250600 |
| H  | -1.18798600 | -0.12462300 | 1.35563400  |
| C  | -1.02799000 | 1.43046600  | -0.11313200 |
| H  | -3.22311000 | -2.43241300 | -1.08721800 |
| H  | -2.78908600 | -2.38803600 | 0.62936100  |
| H  | -1.65872800 | -0.63138800 | -1.60379200 |
| H  | -0.72582600 | -1.60250900 | -0.45503400 |
| O  | -1.73721100 | 2.40073500  | -0.37602700 |
| O  | 0.25496800  | 1.45976900  | -0.29361100 |
| Hg | 1.57510700  | -0.19484200 | 0.04271400  |

## Molecule: Hg-PRO-032

|    |             |             |             |
|----|-------------|-------------|-------------|
| N  | 1.86250600  | -0.44268000 | 1.21988800  |
| H  | 1.01905100  | -0.18379100 | 1.73279200  |
| H  | 2.65124200  | -0.38927500 | 1.86372100  |
| C  | 1.73226900  | -1.84198100 | 0.65662100  |
| C  | 2.10742200  | 0.50903200  | 0.05443900  |
| H  | 0.66773100  | -2.04421400 | 0.55256200  |
| H  | 2.17582000  | -2.54252800 | 1.35706100  |
| C  | 2.40812300  | -1.75138700 | -0.69696900 |
| C  | 1.98471100  | -0.37089400 | -1.19340300 |
| H  | 3.12527200  | 0.86745100  | 0.16621700  |
| C  | 1.18979400  | 1.72585400  | 0.06518900  |
| H  | 2.08539500  | -2.55434000 | -1.35603700 |
| H  | 3.49272500  | -1.80275600 | -0.58840100 |
| H  | 0.94890100  | -0.39782800 | -1.54087000 |
| H  | 2.60704500  | 0.01652400  | -1.99607400 |
| O  | -0.07319700 | 1.59368900  | 0.33483200  |
| O  | 1.68099700  | 2.82240400  | -0.18586400 |
| Hg | -1.26508800 | -0.16028700 | -0.04046500 |

## Molecule: Fe-PRO-01

|    |             |             |             |
|----|-------------|-------------|-------------|
| N  | 1.83503100  | -1.12017100 | 0.34379700  |
| H  | 1.31853100  | -1.76644900 | -0.25671400 |
| H  | 1.97972800  | -1.58407000 | 1.24093400  |
| C  | 3.17101900  | -0.75642000 | -0.30299700 |
| C  | 1.06998800  | 0.16114200  | 0.54905300  |
| H  | 3.12118100  | -1.10480800 | -1.33005700 |
| H  | 3.95824600  | -1.27842600 | 0.23012700  |
| C  | 3.23646800  | 0.75992200  | -0.21613600 |
| C  | 1.77843100  | 1.19108900  | -0.34172200 |
| H  | 1.17264700  | 0.43977400  | 1.59716800  |
| C  | -0.38308400 | 0.02834800  | 0.26187400  |
| H  | 3.86069300  | 1.17123200  | -1.00611000 |
| H  | 3.63879500  | 1.07169900  | 0.74829100  |
| H  | 1.42828800  | 1.09530800  | -1.37061900 |
| H  | 1.58407600  | 2.19974400  | 0.01104900  |
| O  | -0.94059200 | -1.01375900 | -0.19979600 |
| O  | -1.15349000 | 1.02294200  | 0.47832200  |
| Fe | -2.74583400 | -0.03002900 | -0.16151100 |

## Molecule: Fe-PRO-022

|    |             |             |             |
|----|-------------|-------------|-------------|
| N  | -2.12262900 | 0.63280400  | 0.62463000  |
| H  | -2.21335900 | 1.57701200  | 0.23886800  |
| H  | -2.33669400 | 0.67923200  | 1.62066900  |
| C  | -3.05486700 | -0.34493900 | -0.06973700 |
| C  | -0.71017300 | 0.14263100  | 0.43428500  |
| H  | -3.31043500 | 0.09199300  | -1.03094600 |
| H  | -3.94759100 | -0.45895000 | 0.53612600  |
| C  | -2.21555400 | -1.60190200 | -0.22317900 |
| C  | -0.82469700 | -1.05184600 | -0.52410700 |
| H  | -0.33273500 | -0.16984400 | 1.40599400  |
| C  | 0.16861800  | 1.24517700  | -0.10260700 |
| H  | -2.59537300 | -2.23635000 | -1.02082000 |
| H  | -2.20854500 | -2.17251400 | 0.70648100  |
| H  | -0.76340200 | -0.70778000 | -1.55728500 |
| H  | -0.01979600 | -1.76325000 | -0.34484900 |
| O  | -0.23871200 | 2.34575800  | -0.39542000 |
| O  | 1.44297700  | 0.90692200  | -0.26645700 |
| Fe | 2.41431800  | -0.60097500 | 0.12617100  |

## Molecule: Hg-PRO-01

|    |             |             |             |
|----|-------------|-------------|-------------|
| N  | 3.35768700  | -1.03265900 | 0.36000600  |
| H  | 2.87593700  | -1.79276400 | -0.13010200 |
| H  | 3.72674800  | -1.40108700 | 1.23607900  |
| C  | 4.47353000  | -0.44651100 | -0.48331000 |
| C  | 2.35634300  | 0.06306000  | 0.64560600  |
| H  | 4.26684200  | -0.72084900 | -1.51438100 |
| H  | 5.41503800  | -0.88361500 | -0.16700300 |
| C  | 4.34920300  | 1.05106600  | -0.26204800 |
| C  | 2.83977100  | 1.26451100  | -0.17883300 |
| H  | 2.39477600  | 0.27435100  | 1.71042700  |
| C  | 0.95768900  | -0.39699700 | 0.26201800  |
| H  | 4.80800400  | 1.60969000  | -1.07525100 |
| H  | 4.82910700  | 1.33922400  | 0.67447000  |
| H  | 2.39618800  | 1.23295600  | -1.17547000 |
| H  | 2.55563100  | 2.19774600  | 0.29946000  |
| O  | 0.77555000  | -1.44473400 | -0.34958300 |
| O  | 0.06182200  | 0.45717900  | 0.62713600  |
| Hg | -1.91662800 | 0.05078300  | -0.05624100 |

## Molecule: Hg-PRO-012

|    |             |             |             |
|----|-------------|-------------|-------------|
| N  | 2.99677700  | -1.01918500 | 0.58828300  |
| H  | 2.31366200  | -1.71792600 | 0.28521600  |
| H  | 3.31708400  | -1.27113300 | 1.52297600  |
| C  | 4.16390100  | -0.94472800 | -0.37642600 |
| C  | 2.32971700  | 0.34146600  | 0.63148600  |
| H  | 3.82546000  | -1.37725000 | -1.31403100 |
| H  | 4.98383900  | -1.53102200 | 0.02533100  |
| C  | 4.43475100  | 0.54343500  | -0.50554100 |
| C  | 3.03670700  | 1.15804600  | -0.46018000 |
| H  | 2.51395800  | 0.76167600  | 1.61580500  |
| C  | 0.83626700  | 0.22461500  | 0.41135700  |
| H  | 4.96231200  | 0.76944400  | -1.42982100 |
| H  | 5.03506800  | 0.89529500  | 0.33475900  |
| H  | 2.52915300  | 1.02034400  | -1.41600500 |
| H  | 3.03223900  | 2.21530500  | -0.20999600 |
| O  | 0.37519000  | -0.85813100 | -0.05050900 |
| O  | 0.12778600  | 1.22443400  | 0.66933800  |
| Hg | -1.82902600 | -0.04372300 | -0.08358800 |

## Molecule: Hg-PRO-021

|    |             |             |             |
|----|-------------|-------------|-------------|
| N  | -3.12659500 | 0.38945300  | 0.69570700  |
| H  | -3.35980500 | 1.33160800  | 0.36211400  |
| H  | -3.30190200 | 0.34957100  | 1.69898900  |
| C  | -3.92485900 | -0.67569500 | -0.02769200 |
| C  | -1.66219200 | 0.15335000  | 0.41742300  |
| H  | -4.26990000 | -0.23402600 | -0.95878200 |
| H  | -4.77542300 | -0.95286200 | 0.58675900  |
| C  | -2.91403500 | -1.78362900 | -0.27043100 |
| C  | -1.63303800 | -1.01418800 | -0.58250600 |
| H  | -1.18798600 | -0.12462300 | 1.35563400  |
| C  | -1.02799000 | 1.43046600  | -0.11313200 |
| H  | -3.22311000 | -2.43241300 | -1.08721800 |
| H  | -2.78908600 | -2.38803600 | 0.62936100  |
| H  | -1.65872800 | -0.63138800 | -1.60379200 |
| H  | -0.72582600 | -1.60250900 | -0.45503400 |
| O  | -1.73721100 | 2.40073500  | -0.37602700 |
| O  | 0.25496800  | 1.45976900  | -0.29361100 |
| Hg | 1.57510700  | -0.19484200 | 0.04271400  |

## Molecule: Hg-PRO-032

|    |             |             |             |
|----|-------------|-------------|-------------|
| N  | 1.86250600  | -0.44268000 | 1.21988800  |
| H  | 1.01905100  | -0.18379100 | 1.73279200  |
| H  | 2.65124200  | -0.38927500 | 1.86372100  |
| C  | 1.73226900  | -1.84198100 | 0.65662100  |
| C  | 2.10742200  | 0.50903200  | 0.05443900  |
| H  | 0.66773100  | -2.04421400 | 0.55256200  |
| H  | 2.17582000  | -2.54252800 | 1.35706100  |
| C  | 2.40812300  | -1.75138700 | -0.69696900 |
| C  | 1.98471100  | -0.37089400 | -1.19340300 |
| H  | 3.12527200  | 0.86745100  | 0.16621700  |
| C  | 1.18979400  | 1.72585400  | 0.06518900  |
| H  | 2.08539500  | -2.55434000 | -1.35603700 |
| H  | 3.49272500  | -1.80275600 | -0.58840100 |
| H  | 0.94890100  | -0.39782800 | -1.54087000 |
| H  | 2.60704500  | 0.01652400  | -1.99607400 |
| O  | -0.07319700 | 1.59368900  | 0.33483200  |
| O  | 1.68099700  | 2.82240400  | -0.18586400 |
| Hg | -1.26508800 | -0.16028700 | -0.04046500 |



|                      |             |             |             |                      |             |             |             |                      |             |             |             |                      |             |             |             |
|----------------------|-------------|-------------|-------------|----------------------|-------------|-------------|-------------|----------------------|-------------|-------------|-------------|----------------------|-------------|-------------|-------------|
| Molecule: Mn-PRO-012 |             |             |             | Molecule: Mn-PRO-013 |             |             |             | Molecule: Mn-PRO-021 |             |             |             | Molecule: Mn-PRO-032 |             |             |             |
| N                    | -2.12702700 | 1.02960400  | 0.38320600  | N                    | 1.89157300  | -1.02844800 | 0.56703100  | N                    | -2.17015500 | 0.50571600  | 0.60871400  | N                    | 1.11056100  | -0.11529100 | 1.22829500  |
| H                    | -1.61166200 | 1.77837300  | -0.09405500 | H                    | 1.19202800  | -1.74782600 | 0.35461600  | H                    | -2.26138400 | 1.46502500  | 0.25119300  | H                    | 0.17513800  | -0.24136400 | 1.62363500  |
| H                    | -2.48513200 | 1.39273200  | 1.26534100  | H                    | 2.36635800  | -1.26949200 | 1.43561400  | H                    | -2.47463900 | 0.48117600  | 1.58036300  | H                    | 1.74060000  | 0.18464900  | 1.97016500  |
| C                    | -3.25468200 | 0.48901500  | -0.46766600 | C                    | 2.89106800  | -0.87854200 | -0.55326000 | C                    | -2.95276500 | -0.48679700 | -0.21378700 | C                    | 1.60340100  | -1.39539400 | 0.58821000  |
| C                    | -1.14543600 | -0.09143500 | 0.64261100  | C                    | 1.16527700  | 0.29144500  | 0.72210200  | C                    | -0.70417000 | 0.14525500  | 0.51314700  | C                    | 1.03324400  | 0.95569600  | 0.15671800  |
| H                    | -3.03175700 | 0.75568800  | -1.49764900 | H                    | 2.38346300  | -1.17094500 | -1.46965100 | H                    | -3.05625200 | -0.06416800 | -1.21046500 | H                    | 0.72427100  | -2.00245600 | 0.37418000  |
| H                    | -4.18302300 | 0.95920000  | -0.15910900 | H                    | 3.73123200  | -1.54060700 | -0.36870600 | H                    | -3.93303700 | -0.62170100 | 0.23270600  | H                    | 2.24625400  | -1.91530100 | 1.29120700  |
| C                    | -3.18454700 | -1.01223800 | -0.24779800 | C                    | 3.21308200  | 0.60369600  | -0.53550200 | C                    | -2.06485100 | -1.71744200 | -0.21600000 | C                    | 2.27545000  | -0.92063800 | -0.68589000 |
| C                    | -1.68215100 | -1.27884300 | -0.16958500 | C                    | 1.85295400  | 1.25003600  | -0.26880400 | C                    | -0.66163300 | -1.12649000 | -0.35049800 | C                    | 1.35181400  | 0.20530900  | -1.14350300 |
| H                    | -1.16212600 | -0.30306700 | 1.70834100  | H                    | 1.29210900  | 0.61755100  | 1.75084000  | H                    | -0.34816000 | -0.04783800 | 1.52211000  | H                    | 1.79560100  | 1.69368000  | 0.38466300  |
| C                    | 0.25346800  | 0.34331700  | 0.22654700  | C                    | -0.31110000 | 0.09809200  | 0.42993100  | C                    | 0.06659200  | 1.32882900  | -0.07130500 | C                    | -0.34282000 | 1.61807800  | 0.13256500  |
| H                    | -3.66842800 | -1.55483900 | -1.05748300 | H                    | 3.65304800  | 0.92778900  | -1.47640300 | H                    | -2.31848200 | -2.39139600 | -1.03170900 | H                    | 2.36165400  | -1.72351800 | -1.41492700 |
| H                    | -3.67057100 | -1.28162500 | 0.69146700  | H                    | 3.91268400  | 0.82726100  | 0.27163300  | H                    | -2.16713400 | -2.25685600 | 0.72721800  | H                    | 3.27331100  | -0.53453800 | -0.46970700 |
| H                    | -1.24394200 | -1.27176300 | -1.16930100 | H                    | 1.27449600  | 1.30434700  | -1.19186400 | H                    | -0.45815100 | -0.86465300 | -1.38945600 | H                    | 0.43058100  | -0.22086900 | -1.55243300 |
| H                    | -1.43298500 | -2.22107900 | 0.31089500  | H                    | 1.92657500  | 2.25016500  | 0.14929400  | H                    | 0.11896300  | -1.80199900 | -0.00529500 | H                    | 1.79185700  | 0.87170700  | -1.88028600 |
| O                    | 0.40283900  | 1.42513000  | -0.36499800 | O                    | -0.71263700 | -1.03004200 | 0.03975200  | O                    | -0.57005100 | 2.34578500  | -0.39649900 | O                    | -1.32729300 | 0.92256400  | 0.56051300  |
| O                    | 1.16584100  | -0.49346700 | 0.51863400  | O                    | -1.06321700 | 1.10066500  | 0.55448300  | O                    | 1.32305000  | 1.18618800  | -0.18967600 | O                    | -0.41631300 | 2.76418800  | -0.32555400 |
| Mn                   | 3.15637800  | -0.14452200 | -0.15258500 | Mn                   | -2.94535400 | -0.07009800 | -0.27781100 | Mn                   | 2.55865300  | -0.58214100 | 0.07129600  | Mn                   | -1.75563600 | -1.10309100 | -0.20371300 |
| Molecule: Ni-PRO-01  |             |             |             | Molecule: Ni-PRO-02  |             |             |             | Molecule: Ni-PRO-032 |             |             |             |                      |             |             |             |
| N                    | 1.83463500  | -1.07075600 | 0.48381200  | N                    | -2.14288900 | 0.62874500  | 0.66122400  | N                    | 1.31134200  | -0.03098600 | 1.23146600  |                      |             |             |             |
| H                    | 1.20852500  | -1.77321300 | 0.08319700  | H                    | -2.19756900 | 1.58137700  | 0.28617800  | H                    | 0.46591500  | -0.17273600 | 1.78625700  |                      |             |             |             |
| H                    | 2.12029100  | -1.39763900 | 1.40703300  | H                    | -2.32081900 | 0.67223800  | 1.66406200  | H                    | 2.04444500  | 0.30834000  | 1.85394000  |                      |             |             |             |
| C                    | 3.04772300  | -0.85068800 | -0.40036800 | C                    | -3.13303800 | -0.29760400 | -0.01611300 | C                    | 1.74405700  | -1.32652700 | 0.58078500  |                      |             |             |             |
| C                    | 1.11606500  | 0.25423700  | 0.62364100  | C                    | -0.75261100 | 0.09986700  | 0.40968500  | C                    | 1.08702600  | 0.99191000  | 0.13047200  |                      |             |             |             |
| H                    | 2.76721300  | -1.16697200 | -1.40143500 | H                    | -3.41175100 | 0.17062900  | -0.95623000 | H                    | 0.84320100  | -1.91660700 | 0.42015300  |                      |             |             |             |
| H                    | 3.85994800  | -1.46770400 | -0.03025300 | H                    | -4.00591000 | -0.39686800 | 0.62073500  | H                    | 2.40824400  | -1.85173200 | 1.25992800  |                      |             |             |             |
| C                    | 3.28363700  | 0.64648500  | -0.32397500 | C                    | -2.34320800 | -1.57733400 | -0.23284600 | C                    | 2.36843600  | -0.87119500 | -0.72188600 |                      |             |             |             |
| C                    | 1.86864100  | 1.22103700  | -0.30445700 | C                    | -0.94460800 | -1.06675400 | -0.57220200 | C                    | 1.43903200  | 0.25423500  | -1.17495400 |                      |             |             |             |
| H                    | 1.20311500  | 0.56552100  | 1.66217800  | H                    | -0.35579400 | -0.25329300 | 1.35902200  | H                    | 1.76732300  | 1.81563700  | 0.31746900  |                      |             |             |             |
| C                    | -0.33743400 | 0.11473300  | 0.29538300  | C                    | 0.12805700  | 1.21345700  | -0.12346200 | C                    | -0.32959100 | 1.52844700  | 0.11549300  |                      |             |             |             |
| H                    | 3.86538600  | 0.99871600  | -1.17285100 | H                    | -2.77642400 | -2.17944100 | -1.02850400 | H                    | 2.42297900  | -1.68310300 | -1.44368100 |                      |             |             |             |
| H                    | 3.81336000  | 0.90199500  | 0.59502000  | H                    | -2.32160700 | -2.17029200 | 0.68277600  | H                    | 3.37576600  | -0.49075200 | -0.54513000 |                      |             |             |             |
| H                    | 1.43174300  | 1.19548400  | -1.30337500 | H                    | -0.90934400 | -0.70005300 | -1.59890800 | H                    | 0.53837300  | -0.16599500 | -1.62866100 |                      |             |             |             |
| H                    | 1.81386100  | 2.23600300  | 0.07864500  | H                    | -0.16170600 | -1.81101400 | -0.43918100 | H                    | 1.89426100  | 0.93950200  | -1.88472000 |                      |             |             |             |
| O                    | -0.82459800 | -0.97208600 | -0.14430300 | O                    | -0.33838200 | 2.30428300  | -0.41079400 | O                    | -1.28935700 | 0.68987600  | 0.45964500  |                      |             |             |             |
| O                    | -1.11796900 | 1.10214600  | 0.44803300  | O                    | 1.39739300  | 0.93852200  | -0.28192700 | O                    | -0.55432000 | 2.67587200  | -0.21127400 |                      |             |             |             |
| Ni                   | -2.61632600 | -0.06972200 | -0.18128700 | Ni                   | 2.40219700  | -0.55309800 | 0.12617400  | Ni                   | -1.71586600 | -0.96260200 | -0.15436600 |                      |             |             |             |

## Molecule: Zn-PRO-01

|    |             |             |             |
|----|-------------|-------------|-------------|
| N  | 2.23180900  | -1.02608900 | 0.41990800  |
| H  | 1.73323800  | -1.79230400 | -0.04646200 |
| H  | 2.55813800  | -1.35680100 | 1.32699700  |
| C  | 3.39072300  | -0.51834800 | -0.40747400 |
| C  | 1.25132300  | 0.10980700  | 0.60967800  |
| H  | 3.18864100  | -0.79326800 | -1.43960900 |
| H  | 4.30066800  | -1.00292400 | -0.06791000 |
| C  | 3.33999500  | 0.98569100  | -0.20593600 |
| C  | 1.83992800  | 1.27991100  | -0.19261200 |
| H  | 1.21578300  | 0.33970800  | 1.67122600  |
| C  | -0.12751100 | -0.33009400 | 0.14375600  |
| H  | 3.86631200  | 1.51116500  | -1.00007600 |
| H  | 3.79221700  | 1.25536100  | 0.75005500  |
| H  | 1.44324200  | 1.27081400  | -1.20905700 |
| H  | 1.58876700  | 2.23043600  | 0.26998900  |
| O  | -0.27706100 | -1.43094700 | -0.39404000 |
| O  | -1.04179700 | 0.54486100  | 0.35760800  |
| Zn | -2.89751900 | 0.11491100  | -0.08625100 |

## Molecule: Zn-PRO-02

|    |             |             |             |
|----|-------------|-------------|-------------|
| N  | -2.37024100 | 0.68907100  | 0.13073800  |
| H  | -2.24740500 | 1.52574100  | -0.45073900 |
| H  | -3.01218100 | 0.91352100  | 0.88984700  |
| C  | -2.88503200 | -0.49262700 | -0.65193500 |
| C  | -1.01232900 | 0.31832300  | 0.68994400  |
| H  | -2.53617500 | -0.37514600 | -1.67524200 |
| H  | -3.97026700 | -0.48734100 | -0.62814200 |
| C  | -2.22401200 | -1.67267900 | 0.03476100  |
| C  | -0.81130500 | -1.15867200 | 0.31232000  |
| H  | -1.05959300 | 0.44634400  | 1.76926800  |
| C  | 0.03363800  | 1.28820500  | 0.14990000  |
| H  | -2.23359800 | -2.56024400 | -0.59434300 |
| H  | -2.74110300 | -1.90210300 | 0.96830500  |
| H  | -0.19981400 | -1.22764800 | -0.59099300 |
| H  | -0.30778000 | -1.69671500 | 1.11080500  |
| O  | -0.32947200 | 2.26770300  | -0.50355700 |
| O  | 1.25507500  | 1.03021600  | 0.46729700  |
| Zn | 2.29630100  | -0.51795200 | -0.15445900 |

## Molecule: Zn-PRO-32

|    |             |             |             |
|----|-------------|-------------|-------------|
| N  | 1.26726300  | 0.10051400  | 1.22140000  |
| H  | 0.40667900  | -0.01017200 | 1.75999800  |
| H  | 1.98084000  | 0.49563400  | 1.83259400  |
| C  | 1.72303400  | -1.23379600 | 0.67257900  |
| C  | 1.03333900  | 1.04355200  | 0.04916300  |
| H  | 0.84001700  | -1.86978300 | 0.61032700  |
| H  | 2.43635900  | -1.67118000 | 1.36415000  |
| C  | 2.27659500  | -0.89015200 | -0.69706100 |
| C  | 1.33009900  | 0.20044900  | -1.20132000 |
| H  | 1.74829100  | 1.85297700  | 0.15053800  |
| C  | -0.38015700 | 1.61356500  | 0.08238100  |
| H  | 2.29380300  | -1.76261500 | -1.34703000 |
| H  | 3.29256100  | -0.50273600 | -0.60788900 |
| H  | 0.41493400  | -0.24780800 | -1.59833500 |
| H  | 1.76487800  | 0.81777300  | -1.98310300 |
| O  | -1.32606500 | 0.81806900  | 0.45993200  |
| O  | -0.55427800 | 2.78442300  | -0.24621700 |
| Zn | -1.49679700 | -1.03424400 | -0.12917400 |

|                      |             |             |             |                      |             |             |             |
|----------------------|-------------|-------------|-------------|----------------------|-------------|-------------|-------------|
| Molecule: Cd-THR-012 |             |             |             | Molecule: Cd-THR-021 |             |             |             |
| N                    | 2.28117100  | 1.69160600  | 0.16154700  | N                    | 2.56384800  | 0.46455800  | 0.95084900  |
| H                    | 1.55738200  | 2.41415200  | 0.13396400  | H                    | 2.72252100  | 1.46283400  | 1.12483400  |
| H                    | 3.13897300  | 2.05482400  | -0.25733900 | H                    | 3.46257200  | -0.01697300 | 0.89731200  |
| H                    | 2.46721100  | 1.46711800  | 1.14384800  | H                    | 2.03776000  | 0.07982900  | 1.73992800  |
| C                    | 1.80283000  | 0.46452200  | -0.54773300 | C                    | 1.77965100  | 0.34092300  | -0.31846100 |
| H                    | 1.93307000  | 0.62953600  | -1.61618900 | H                    | 2.48031600  | 0.53306500  | -1.13137600 |
| C                    | 2.61872800  | -0.74832700 | -0.11167800 | C                    | 1.24291200  | -1.06589800 | -0.51804500 |
| C                    | 0.30913400  | 0.29769600  | -0.28857600 | C                    | 0.78007000  | 1.52434800  | -0.34394200 |
| H                    | 2.17337600  | -1.61172200 | -0.60964200 | H                    | 0.76530800  | -1.07706600 | -1.49785300 |
| C                    | 4.08603800  | -0.65195600 | -0.48500800 | C                    | 2.31650800  | -2.13415400 | -0.45378000 |
| O                    | 2.42685000  | -0.84639100 | 1.30422200  | O                    | 0.23479500  | -1.32042700 | 0.49632800  |
| O                    | -0.32554000 | 1.23466200  | 0.25510500  | O                    | 1.20984200  | 2.60045100  | 0.08721700  |
| H                    | 4.57703300  | 0.19328300  | 0.00107500  | H                    | 2.75202600  | -2.20468600 | 0.54459500  |
| H                    | 4.59837100  | -1.56421800 | -0.17599700 | H                    | 1.88381100  | -3.10333200 | -0.70404500 |
| H                    | 4.19475800  | -0.54900700 | -1.56567300 | H                    | 3.10884200  | -1.91586200 | -1.17040800 |
| H                    | 3.05156500  | -1.49443800 | 1.65429500  | H                    | 0.02742900  | -2.26623600 | 0.50085200  |
| O                    | -0.23257100 | -0.77603500 | -0.67047800 | O                    | -0.37580900 | 1.33704200  | -0.84779700 |
| Cd                   | -2.32313000 | -0.13438100 | 0.03433300  | Cd                   | -1.71777100 | -0.15981900 | 0.10332500  |

  

|                     |             |             |             |                      |             |             |             |                      |             |             |             |
|---------------------|-------------|-------------|-------------|----------------------|-------------|-------------|-------------|----------------------|-------------|-------------|-------------|
| Molecule: Cu-THR-02 |             |             |             | Molecule: Cu-THR-012 |             |             |             | Molecule: Cu-THR-021 |             |             |             |
| N                   | -2.46248500 | -0.94336900 | -0.02151400 | N                    | 1.60113900  | 1.72217500  | 0.02150600  | N                    | 2.17795400  | 0.58372000  | 0.88914900  |
| H                   | -2.39144300 | -1.96605600 | 0.00955100  | H                    | 0.88506600  | 2.43644900  | -0.13170300 | H                    | 2.34975400  | 1.58453600  | 1.02608000  |
| H                   | -3.24333800 | -0.66308000 | -0.61568500 | H                    | 2.47759100  | 2.05464100  | -0.38664100 | H                    | 3.07756200  | 0.10876100  | 0.79303100  |
| H                   | -2.64350500 | -0.61680300 | 0.93190300  | H                    | 1.73347100  | 1.61338800  | 1.03162700  | H                    | 1.70970700  | 0.21881000  | 1.72357800  |
| C                   | -1.16060800 | -0.39503600 | -0.51918300 | C                    | 1.19786800  | 0.41692900  | -0.58167200 | C                    | 1.32583700  | 0.40288900  | -0.32931100 |
| H                   | -1.18666800 | -0.44444200 | -1.60773200 | H                    | 1.30329600  | 0.49907400  | -1.66210900 | H                    | 1.96048100  | 0.64469400  | -1.18148900 |
| C                   | -1.00900500 | 1.06071100  | -0.09862700 | C                    | 2.08766600  | -0.71404100 | -0.06274600 | C                    | 0.87008400  | -1.03174200 | -0.51412100 |
| C                   | -0.07137300 | -1.38759400 | -0.07077700 | C                    | -0.25813800 | 0.16540600  | -0.27896800 | C                    | 0.25228400  | 1.51641600  | -0.28931700 |
| H                   | -0.11237000 | 1.44657700  | -0.59332200 | H                    | 1.68205700  | -1.63656100 | -0.48523200 | H                    | 0.39184900  | -1.07647800 | -1.49248700 |
| C                   | -2.18277300 | 1.92590800  | -0.52611300 | C                    | 3.54069000  | -0.56705300 | -0.47242700 | C                    | 1.98071500  | -2.05567700 | -0.43586000 |
| O                   | -0.83098700 | 1.05350100  | 1.32006100  | O                    | 1.91689600  | -0.70637400 | 1.35622000  | O                    | -0.14565200 | -1.31662600 | 0.49585600  |
| O                   | -0.42671200 | -2.49227900 | 0.33346100  | O                    | -0.93939300 | 0.97762700  | 0.41254400  | O                    | 0.65864500  | 2.65934400  | -0.09801400 |
| H                   | -3.10738700 | 1.62836800  | -0.02855300 | H                    | 3.98753200  | 0.34689300  | -0.07709600 | H                    | 2.41872800  | -2.10284400 | 0.56192800  |
| H                   | -1.97725900 | 2.96490600  | -0.26629800 | H                    | 4.10788600  | -1.41524800 | -0.08688900 | H                    | 1.58498800  | -3.04059900 | -0.68433700 |
| H                   | -2.32673600 | 1.86621900  | -1.60600300 | H                    | 3.62853600  | -0.56335500 | -1.55965600 | H                    | 2.76027100  | -1.80711800 | -1.15657900 |
| H                   | -0.86211600 | 1.96600600  | 1.63570900  | H                    | 2.56378900  | -1.30821200 | 1.74690800  | H                    | -0.32298000 | -2.27072100 | 0.50854900  |
| O                   | 1.17257100  | -1.09225300 | -0.23352200 | O                    | -0.83553500 | -0.85802200 | -0.74714700 | O                    | -0.98125300 | 1.22182200  | -0.50074000 |
| Cu                  | 2.14868200  | 0.46366200  | -0.06140600 | Cu                   | -2.55591200 | -0.17915800 | 0.05731700  | Cu                   | -1.86218900 | -0.33974900 | 0.13491500  |

  

|                     |             |             |             |                     |             |             |             |
|---------------------|-------------|-------------|-------------|---------------------|-------------|-------------|-------------|
| Molecule: Fe-THR-01 |             |             |             | Molecule: Fe-THR-02 |             |             |             |
| N                   | 1.52797000  | 1.70975100  | 0.13653800  | N                   | 2.16244700  | 0.63931000  | 0.86142500  |
| H                   | 0.82070200  | 2.43979400  | 0.01847400  | H                   | 2.34374800  | 1.64067900  | 0.98151600  |
| H                   | 2.41448200  | 2.06653800  | -0.22844000 | H                   | 3.06196000  | 0.16269500  | 0.76219500  |
| H                   | 1.63991700  | 1.53214700  | 1.14023900  | H                   | 1.70512400  | 0.28941500  | 1.70910100  |
| C                   | 1.14259100  | 0.45057100  | -0.56837200 | C                   | 1.30146100  | 0.42927300  | -0.34511100 |
| H                   | 1.24690200  | 0.61665800  | -1.64057700 | H                   | 1.91270500  | 0.69153600  | -1.20890600 |
| C                   | 2.03470000  | -0.71498200 | -0.13546000 | C                   | 0.87891400  | -1.01757400 | -0.53003100 |
| C                   | -0.30753400 | 0.17506400  | -0.29015200 | C                   | 0.19183600  | 1.49949100  | -0.28520300 |
| H                   | 1.69195900  | -1.58531400 | -0.70097300 | H                   | 0.44214900  | -1.08942900 | -1.52523200 |
| C                   | 3.50469400  | -0.46774500 | -0.41867700 | C                   | 1.98415800  | -2.03374600 | -0.36725800 |
| O                   | 1.76629000  | -0.88895900 | 1.25593800  | O                   | -0.19234900 | -1.29913300 | 0.43386700  |
| O                   | -1.01599700 | 0.98655600  | 0.38063400  | O                   | 0.50301900  | 2.65509800  | -0.09481500 |
| H                   | 3.89176200  | 0.37060500  | 0.16306100  | H                   | 2.36737500  | -2.05564800 | 0.65317000  |
| H                   | 4.07475700  | -1.35699500 | -0.14795000 | H                   | 1.60274000  | -3.02401300 | -0.61569500 |
| H                   | 3.66172500  | -0.26798600 | -1.47938200 | H                   | 2.79795200  | -1.79652500 | -1.05280500 |
| H                   | 2.40926400  | -1.51050600 | 1.62142100  | H                   | -0.30095600 | -2.25817900 | 0.55737600  |
| O                   | -0.90218200 | -0.85496700 | -0.73801900 | O                   | -1.05275200 | 1.12282000  | -0.47421000 |
| Fe                  | -2.67611000 | -0.18737300 | 0.06099700  | Fe                  | -1.97198000 | -0.38964000 | 0.15216100  |

  

|                     |             |             |             |                     |             |             |             |
|---------------------|-------------|-------------|-------------|---------------------|-------------|-------------|-------------|
| Molecule: Hg-THR-01 |             |             |             | Molecule: Hg-THR-02 |             |             |             |
| N                   | 3.15119400  | 1.61392300  | 0.01744600  | N                   | 3.22018000  | 0.44931700  | 0.68230500  |
| H                   | 2.61230100  | 2.47745800  | -0.07820700 | H                   | 3.38946700  | 1.45097600  | 0.82414000  |
| H                   | 4.06099100  | 1.73235100  | -0.43118300 | H                   | 4.09508900  | -0.01421400 | 0.43360700  |
| H                   | 3.29913100  | 1.44836200  | 1.01735500  | H                   | 2.88432500  | 0.05375400  | 1.56468800  |
| C                   | 2.40135100  | 0.46496700  | -0.57666300 | C                   | 2.19047100  | 0.30179500  | -0.39333000 |
| H                   | 2.48751600  | 0.53577100  | -1.65867200 | H                   | 2.71080800  | 0.45195200  | -1.34029700 |
| C                   | 2.99077800  | -0.85897000 | -0.09446200 | C                   | 1.59666000  | -1.09719600 | -0.41382500 |
| C                   | 0.92711200  | 0.61447800  | -0.18955500 | C                   | 1.22072000  | 1.50059700  | -0.26642700 |
| H                   | 2.37965400  | -1.64474300 | -0.54337100 | H                   | 0.96820800  | -1.14680800 | -1.30382500 |
| C                   | 4.44157600  | -1.06284000 | -0.49149100 | C                   | 2.62811500  | -2.20445600 | -0.46893600 |
| O                   | 2.81830800  | -0.85655900 | 1.32669800  | O                   | 0.75370500  | -1.22374400 | 0.75807100  |
| O                   | 0.55878200  | 1.56810100  | 0.48987600  | O                   | 1.68031300  | 2.54048400  | 0.20577600  |
| H                   | 5.09734100  | -0.31051100 | -0.04955100 | H                   | 3.25934900  | -2.22374300 | 0.42057300  |
| H                   | 4.77331600  | -2.04287100 | -0.14450700 | H                   | 2.12035300  | -3.16643700 | -0.54786600 |
| H                   | 4.54719500  | -1.03117400 | -1.57670700 | H                   | 3.25949500  | -2.07847400 | -1.34960800 |
| H                   | 3.32166700  | -1.59295400 | 1.69668700  | H                   | 0.50385800  | -2.15332500 | 0.85962400  |
| O                   | 0.18339500  | -0.32708700 | -0.65590700 | O                   | 0.03357300  | 1.39244200  | -0.75034800 |
| Hg                  | -1.84607800 | -0.11113300 | 0.00592200  | Hg                  | -1.39110900 | -0.08746000 | 0.04012400  |

| Molecule: Mn-THR-11 |             |             |             | Molecule: Mn-THR-012 |             |             |             | Molecule: Mn-THR-21 |             |             |             |
|---------------------|-------------|-------------|-------------|----------------------|-------------|-------------|-------------|---------------------|-------------|-------------|-------------|
| N                   | 2.03120600  | 1.60479500  | 0.05387500  | N                    | 2.02811400  | 1.60090300  | 0.08330700  | N                   | -2.26672100 | 0.64827600  | -0.74782700 |
| H                   | 1.45250800  | 2.44832300  | 0.03177800  | H                    | 1.37839000  | 2.38436300  | 0.21317900  | H                   | -2.25629600 | 1.65955700  | -0.92911800 |
| H                   | 2.91593500  | 1.77586100  | -0.42532000 | H                    | 2.83275200  | 1.89280200  | -0.47149700 | H                   | -3.21704800 | 0.33715800  | -0.54392900 |
| H                   | 2.22724500  | 1.39086700  | 1.03605700  | H                    | 2.35513600  | 1.31406000  | 1.01067600  | H                   | -1.94179500 | 0.17006800  | -1.59173400 |
| C                   | 1.27619200  | 0.47154900  | -0.56462200 | C                    | 1.28002300  | 0.47515100  | -0.55832600 | C                   | -1.33068300 | 0.39912000  | 0.39317800  |
| H                   | 1.37572600  | 0.56073700  | -1.64470800 | H                    | 1.38444000  | 0.57909300  | -1.63657800 | H                   | -1.89079400 | 0.60194400  | 1.30628100  |
| C                   | 1.85589700  | -0.86144400 | -0.10416500 | C                    | 1.85634700  | -0.86348800 | -0.11333500 | C                   | -0.86889700 | -1.04756500 | 0.43997300  |
| C                   | -0.20670800 | 0.62372000  | -0.19929400 | C                    | -0.20692200 | 0.62882700  | -0.20528900 | C                   | -0.22090300 | 1.47612200  | 0.31597000  |
| H                   | 1.23217500  | -1.63627700 | -0.55421500 | H                    | 1.23576500  | -1.63433100 | -0.57404900 | H                   | -0.28496400 | -1.15171000 | 1.35547100  |
| C                   | 3.30125700  | -1.07754800 | -0.51417500 | C                    | 3.30409400  | -1.06791800 | -0.51969200 | C                   | -2.00642400 | -2.05005000 | 0.44599600  |
| O                   | 1.69826600  | -0.87665300 | 1.32071800  | O                    | 1.69489000  | -0.89477500 | 1.31103600  | O                   | 0.00158600  | -1.26266900 | -0.69560900 |
| O                   | -0.56713700 | 1.62742600  | 0.43474700  | O                    | -0.57258000 | 1.64910300  | 0.40014300  | O                   | -0.52632300 | 2.54493000  | -0.24015200 |
| H                   | 3.96563900  | -0.32757200 | -0.08097300 | H                    | 3.96008900  | -0.31440000 | -0.07969900 | H                   | -2.59021700 | -2.00684100 | -0.47549400 |
| H                   | 3.63224500  | -2.05947500 | -0.17110500 | H                    | 3.64149600  | -2.04936000 | -0.18139100 | H                   | -1.60347100 | -3.05908300 | 0.54427800  |
| H                   | 3.39577500  | -1.04655600 | -1.60059100 | H                    | 3.40202800  | -1.02931300 | -1.60553600 | H                   | -2.66828200 | -1.86193700 | 1.29219900  |
| H                   | 2.20339400  | -1.61940000 | 1.67481600  | H                    | 2.20934800  | -1.63376300 | 1.65949300  | H                   | 0.10976700  | -2.21441200 | -0.82706400 |
| O                   | -0.95153100 | -0.32058500 | -0.60825400 | O                    | -0.94778500 | -0.32457400 | -0.59649300 | O                   | 0.88897700  | 1.20610800  | 0.86357400  |
| Mn                  | -3.01662800 | -0.36397000 | 0.01892000  | Mn                   | -3.01574800 | -0.36755700 | 0.02178500  | Mn                  | 2.23430700  | -0.38341600 | -0.15557300 |

Molecule: Ni-THR-01

|    |             |             |             |
|----|-------------|-------------|-------------|
| N  | 1.60662800  | 1.71989900  | 0.14807300  |
| H  | 0.92465200  | 2.47213600  | 0.02494100  |
| H  | 2.51246800  | 2.04867900  | -0.19368600 |
| H  | 1.69130800  | 1.52644400  | 1.15099900  |
| C  | 1.18603300  | 0.48354200  | -0.57616600 |
| H  | 1.32977300  | 0.65182900  | -1.64246100 |
| C  | 2.01672600  | -0.71995300 | -0.12498400 |
| C  | -0.28206600 | 0.24354100  | -0.33099800 |
| H  | 1.63114000  | -1.57664700 | -0.68258900 |
| C  | 3.50004200  | -0.56424200 | -0.39629000 |
| O  | 1.73217900  | -0.86940100 | 1.26756000  |
| O  | -0.98315500 | 1.04991900  | 0.35062400  |
| H  | 3.92955400  | 0.26611600  | 0.16724100  |
| H  | 4.01455300  | -1.47818000 | -0.09677900 |
| H  | 3.67815800  | -0.40317200 | -1.46023300 |
| H  | 2.34297300  | -1.51934500 | 1.63835700  |
| O  | -0.84360000 | -0.78693800 | -0.80977600 |
| Ni | -2.53817000 | -0.20832600 | 0.07718100  |

Molecule: Ni-THR-02

|    |             |             |             |
|----|-------------|-------------|-------------|
| N  | -2.07510400 | 0.55744700  | -0.97025700 |
| H  | -2.26876300 | 1.55024400  | -1.13209900 |
| H  | -2.96813300 | 0.06246100  | -0.91873500 |
| H  | -1.55237400 | 0.19525600  | -1.77299100 |
| C  | -1.28992500 | 0.40993100  | 0.29682600  |
| H  | -1.97231700 | 0.65449600  | 1.10949800  |
| C  | -0.82919500 | -1.01717900 | 0.52792200  |
| C  | -0.22954600 | 1.53804700  | 0.29692400  |
| H  | -0.33881500 | -1.03083300 | 1.50182000  |
| C  | -1.93527900 | -2.04815400 | 0.49396400  |
| O  | 0.18020000  | -1.33926300 | -0.48522400 |
| O  | -0.65176900 | 2.68253300  | 0.17880700  |
| H  | -2.39209500 | -2.12581900 | -0.49344800 |
| H  | -1.52980200 | -3.02334400 | 0.76427400  |
| H  | -2.70139100 | -1.78130600 | 1.22196200  |
| H  | 0.31448400  | -2.30080000 | -0.51815500 |
| O  | 1.01644900  | 1.24603000  | 0.44503300  |
| Ni | 1.83141300  | -0.36117000 | -0.13475200 |

Molecule: Zn-THR-01

|    |             |             |             |
|----|-------------|-------------|-------------|
| N  | 1.64247100  | 1.71234700  | 0.14694300  |
| H  | 0.91093200  | 2.41607400  | 0.02809100  |
| H  | 2.53013400  | 2.09968500  | -0.17928500 |
| H  | 1.72458200  | 1.51058800  | 1.14780700  |
| C  | 1.29698000  | 0.45935400  | -0.59380700 |
| H  | 1.48109000  | 0.63823100  | -1.65120500 |
| C  | 2.16743100  | -0.69900300 | -0.10806500 |
| C  | -0.18108300 | 0.15132100  | -0.40830300 |
| H  | 1.85013600  | -1.57523900 | -0.67764700 |
| C  | 3.65325500  | -0.47218600 | -0.31438200 |
| O  | 1.83690200  | -0.86779700 | 1.27456400  |
| O  | -0.88168700 | 0.94439100  | 0.29614100  |
| H  | 4.01658800  | 0.38444200  | 0.25619600  |
| H  | 4.20063000  | -1.35536200 | 0.01808800  |
| H  | 3.87069100  | -0.31201300 | -1.37120800 |
| H  | 2.46096300  | -1.49334500 | 1.66425400  |
| O  | -0.65932400 | -0.86761400 | -0.94537900 |
| Zn | -2.61765500 | -0.15360800 | 0.10936800  |

Molecule: Zn-THR-02

|    |             |             |             |
|----|-------------|-------------|-------------|
| N  | -1.12195000 | 0.41683900  | -1.64371900 |
| H  | -0.26724700 | -0.10680900 | -1.85110200 |
| H  | -1.09671200 | 1.29534300  | -2.16665000 |
| H  | -1.91867900 | -0.12858200 | -1.98065400 |
| C  | -1.22600900 | 0.68424500  | -0.17195500 |
| H  | -2.15933200 | 1.21412800  | -0.01199800 |
| C  | -1.27978000 | -0.64142800 | 0.59907800  |
| C  | -0.07451000 | 1.62886200  | 0.24541800  |
| H  | -1.05286500 | -0.42131300 | 1.64264300  |
| C  | -2.62309800 | -1.33204000 | 0.49706700  |
| O  | -0.22999100 | -1.49752300 | 0.06199400  |
| O  | 1.12901100  | 1.24487100  | 0.00248700  |
| H  | -2.90086800 | -1.54356700 | -0.53669300 |
| H  | -2.59734800 | -2.27302000 | 1.04762300  |
| H  | -3.38866300 | -0.69599700 | 0.94266600  |
| H  | -0.23794500 | -2.34300400 | 0.53312700  |
| O  | -0.37040900 | 2.69825900  | 0.77460300  |
| Zn | 1.68216000  | -0.65059100 | 0.00522500  |

## Molecule: Cd-VAL-01

|    |             |             |             |
|----|-------------|-------------|-------------|
| N  | 2.31665900  | 1.94383400  | -0.21928400 |
| H  | 2.01893300  | 2.12386500  | 0.74239600  |
| H  | 1.88080800  | 2.65114300  | -0.81469400 |
| H  | 3.33151500  | 2.05604600  | -0.27664000 |
| C  | 1.92029800  | 0.56359700  | -0.64972800 |
| H  | 2.14943900  | 0.49164800  | -1.70970700 |
| C  | 2.74266500  | -0.48671900 | 0.12841200  |
| C  | 0.42379900  | 0.39842100  | -0.44462400 |
| H  | 3.78036200  | -0.15054500 | 0.03991400  |
| C  | 2.37968400  | -0.55950900 | 1.61095300  |
| C  | 2.64150900  | -1.85882300 | -0.53153100 |
| O  | -0.15897300 | 1.11697600  | 0.41200300  |
| H  | 1.36054600  | -0.92636900 | 1.75046700  |
| H  | 3.05437000  | -1.25308200 | 2.11383400  |
| H  | 2.46673000  | 0.40417100  | 2.11622300  |
| H  | 2.89269700  | -1.81071700 | -1.59229300 |
| H  | 3.33683000  | -2.54524800 | -0.04668900 |
| H  | 1.63789000  | -2.27414300 | -0.43475500 |
| O  | -0.16964000 | -0.49486400 | -1.10506000 |
| Cd | -2.12803200 | -0.11859000 | 0.09396900  |

## Molecule: Cd-VAL-02

|    |             |             |             |
|----|-------------|-------------|-------------|
| N  | 2.40601500  | -0.95515600 | 1.40078300  |
| H  | 3.05720700  | -1.34242900 | 0.71121800  |
| H  | 2.01988100  | -1.73845300 | 1.93088100  |
| H  | 2.91339800  | -0.34436700 | 2.04421500  |
| C  | 1.31785500  | -0.20904600 | 0.69044300  |
| H  | 0.50638600  | -0.08465100 | 1.40361700  |
| C  | 1.83411900  | 1.18045100  | 0.26915900  |
| C  | 0.85912600  | -1.09155900 | -0.47746500 |
| H  | 2.21878400  | 1.62644800  | 1.19207700  |
| C  | 2.97185600  | 1.12017100  | -0.74834400 |
| C  | 0.69693700  | 2.06374400  | -0.23194800 |
| O  | 1.68201500  | -1.86625100 | -0.98001300 |
| H  | 2.63523800  | 0.69033000  | -1.69352100 |
| H  | 3.33212000  | 2.13014300  | -0.94740500 |
| H  | 3.82213000  | 0.53591400  | -0.39153100 |
| H  | -0.12729400 | 2.10039500  | 0.48696000  |
| H  | 1.05914500  | 3.08220100  | -0.37682700 |
| H  | 0.30753500  | 1.70879000  | -1.18741100 |
| O  | -0.34507600 | -0.97035600 | -0.89573800 |
| Cd | -1.98669800 | 0.05483500  | 0.10452500  |

## Molecule: Cd-VAL-031

|    |             |             |             |
|----|-------------|-------------|-------------|
| N  | 0.89223900  | 0.19323000  | 2.01888400  |
| H  | 0.00751600  | -0.27691900 | 1.82412700  |
| H  | 0.66850700  | 1.08011300  | 2.47386700  |
| H  | 1.42400300  | -0.38153300 | 2.67676100  |
| C  | 1.69150000  | 0.42570900  | 0.76929600  |
| H  | 2.55630800  | 1.00362900  | 1.08691700  |
| C  | 2.18121900  | -0.91578800 | 0.18960700  |
| C  | 0.90038000  | 1.29070200  | -0.21744700 |
| H  | 2.58460200  | -1.46462900 | 1.04606700  |
| C  | 1.07248400  | -1.75462300 | -0.44283100 |
| C  | 3.32717200  | -0.68930600 | -0.79427600 |
| O  | -0.37570300 | 1.36792900  | -0.08610200 |
| H  | 0.66066600  | -1.25627400 | -1.32441300 |
| H  | 1.47406200  | -2.71661600 | -0.76329800 |
| H  | 0.25284900  | -1.96179800 | 0.25132400  |
| H  | 4.11735600  | -0.08173200 | -0.34987000 |
| H  | 3.75628600  | -1.64972000 | -1.08259000 |
| H  | 2.97987500  | -0.18919000 | -1.69875600 |
| O  | 1.54612900  | 1.90448000  | -1.06936800 |
| Cd | -1.89849300 | -0.20369500 | -0.12613900 |

## Molecule: Cu-VAL-02

|    |             |             |             |
|----|-------------|-------------|-------------|
| N  | -1.97689700 | -1.06254700 | -1.30347500 |
| H  | -2.59933000 | -1.41477600 | -0.57108000 |
| H  | -1.59404400 | -1.87122300 | -1.79782000 |
| H  | -2.52136100 | -0.50538100 | -1.96609200 |
| C  | -0.88032600 | -0.24280400 | -0.69837900 |
| H  | -0.12946300 | -0.10598300 | -1.47458800 |
| C  | -1.42644800 | 1.13706500  | -0.27546300 |
| C  | -0.29165200 | -1.05541500 | 0.45596800  |
| H  | -1.85524900 | 1.55545000  | -1.19122800 |
| C  | -2.52378200 | 1.05782300  | 0.78407300  |
| C  | -0.30050700 | 2.06047500  | 0.17763800  |
| O  | -1.00344600 | -1.84780100 | 1.06612600  |
| H  | -2.14429800 | 0.63606200  | 1.71647700  |
| H  | -2.89026800 | 2.06307500  | 0.99527100  |
| H  | -3.38039200 | 0.46285200  | 0.46227100  |
| H  | 0.51749300  | 2.07991900  | -0.54992700 |
| H  | -0.67734300 | 3.07793900  | 0.28422300  |
| H  | 0.10409900  | 1.75015600  | 1.14272100  |
| O  | 0.94930800  | -0.85784900 | 0.76691200  |
| Cu | 2.20613200  | 0.12455400  | -0.18114600 |

## Molecule: Cu-VAL-011

|    |             |             |             |
|----|-------------|-------------|-------------|
| N  | 1.56597900  | 2.02371300  | -0.30870200 |
| H  | 1.43997800  | 2.20397200  | 0.69052600  |
| H  | 0.93019900  | 2.64315500  | -0.81667900 |
| H  | 2.52757000  | 2.26748800  | -0.55817300 |
| C  | 1.30798900  | 0.58618800  | -0.64338200 |
| H  | 1.44292700  | 0.49227500  | -1.71963300 |
| C  | 2.31649700  | -0.33043700 | 0.08276000  |
| C  | -0.12993300 | 0.27226400  | -0.32476200 |
| H  | 3.28571200  | 0.15677300  | -0.05771500 |
| C  | 2.04016800  | -0.45531500 | 1.58020200  |
| C  | 2.38224400  | -1.69965900 | -0.58825300 |
| O  | -0.83784800 | 1.05747900  | 0.37303200  |
| H  | 1.09792700  | -0.97699800 | 1.76373500  |
| H  | 2.83734700  | -1.03342800 | 2.04811700  |
| H  | 1.99732500  | 0.51184300  | 2.08529600  |
| H  | 2.57929400  | -1.60891700 | -1.65760900 |
| H  | 3.18764900  | -2.28229900 | -0.13978200 |
| H  | 1.45243100  | -2.25335600 | -0.45489700 |
| O  | -0.66448300 | -0.79289700 | -0.75504700 |
| Cu | -2.38701200 | -0.22901300 | 0.11705000  |

## Molecule: Cu-VAL-031

|    |             |             |             |
|----|-------------|-------------|-------------|
| N  | 0.87343600  | 0.95416200  | 1.86608500  |
| H  | 0.05306100  | 0.37887000  | 2.06826000  |
| H  | 0.61125400  | 1.93020800  | 2.02034400  |
| H  | 1.61315300  | 0.70886900  | 2.52826100  |
| C  | 1.35262200  | 0.74607000  | 0.46033100  |
| H  | 2.17021300  | 1.44650900  | 0.30978200  |
| C  | 1.87671000  | -0.69446300 | 0.28938600  |
| C  | 0.23998900  | 1.09517500  | -0.52289200 |
| H  | 2.55915400  | -0.84621400 | 1.13157600  |
| C  | 0.78119600  | -1.75620500 | 0.36141900  |
| C  | 2.68939500  | -0.82639300 | -0.99566000 |
| O  | -0.96995100 | 1.05703600  | -0.03960200 |
| H  | 0.09109600  | -1.67231200 | -0.48425000 |
| H  | 1.23233800  | -2.74792900 | 0.31533900  |
| H  | 0.20132100  | -1.70618400 | 1.28525600  |
| H  | 3.46790800  | -0.06407700 | -1.05354400 |
| H  | 3.16781000  | -1.80605100 | -1.02313100 |
| H  | 2.05584500  | -0.73721400 | -1.87860000 |
| O  | 0.51383400  | 1.38743300  | -1.67608400 |
| Cu | -2.11475000 | -0.43118800 | -0.07282400 |

## Molecule: Fe-VAL-01

|    |             |             |             |
|----|-------------|-------------|-------------|
| N  | 1.49695700  | 2.01969900  | -0.33864500 |
| H  | 1.38810600  | 2.21692900  | 0.66014200  |
| H  | 0.85332500  | 2.62977500  | -0.84978300 |
| H  | 2.45455800  | 2.26278600  | -0.60638400 |
| C  | 1.24773500  | 0.57675600  | -0.65067500 |
| H  | 1.36904900  | 0.46379700  | -1.72704000 |
| C  | 2.26644400  | -0.33057100 | 0.07958200  |
| C  | -0.17696200 | 0.25723100  | -0.31594500 |
| H  | 3.22897600  | 0.16228900  | -0.08342100 |
| C  | 2.00952400  | -0.43233900 | 1.58158100  |
| C  | 2.32606700  | -1.70641700 | -0.57623300 |
| O  | -0.88157800 | 0.99374200  | 0.43899200  |
| H  | 1.07899000  | -0.96692200 | 1.78697900  |
| H  | 2.82270900  | -0.98855700 | 2.04791400  |
| H  | 1.95740700  | 0.54263100  | 2.07016300  |
| H  | 2.52181100  | -1.62779300 | -1.64651900 |
| H  | 3.13089800  | -2.28472200 | -0.12158400 |
| H  | 1.39571300  | -2.25814400 | -0.43400000 |
| O  | -0.76157600 | -0.77201000 | -0.78494300 |
| Fe | -2.52199400 | -0.24045300 | 0.12814600  |

## Molecule: Hg-VAL-01

|    |             |             |             |
|----|-------------|-------------|-------------|
| N  | 3.16376100  | 1.78347800  | -0.39167400 |
| H  | 3.08106700  | 2.03867600  | 0.59520000  |
| H  | 2.73755900  | 2.53652000  | -0.93585400 |
| H  | 4.15447000  | 1.72557000  | -0.63749800 |
| C  | 2.48292300  | 0.47660300  | -0.66276600 |
| H  | 2.49290600  | 0.34205800  | -1.74141600 |
| C  | 3.26049200  | -0.67182200 | 0.01026000  |
| C  | 1.03558000  | 0.61089000  | -0.18621300 |
| H  | 4.30915800  | -0.48332100 | -0.24057700 |
| C  | 3.11981100  | -0.67990100 | 1.53147900  |
| C  | 2.87909800  | -2.02116000 | -0.59219900 |
| O  | 0.72140300  | 1.50543600  | 0.59426300  |
| H  | 2.09177900  | -0.89650600 | 1.83049800  |
| H  | 3.75952700  | -1.45662000 | 1.95183200  |
| H  | 3.41444500  | 0.26763000  | 1.98690600  |
| H  | 2.97489800  | -2.01184500 | -1.67925100 |
| H  | 3.54178900  | -2.79301300 | -0.19853000 |
| H  | 1.85476600  | -2.29681200 | -0.33968200 |
| O  | 0.25083100  | -0.28636900 | -0.67574100 |
| Hg | -1.76255000 | -0.06871100 | 0.02748200  |

## Molecule: Fe-VAL-02

|    |             |             |             |
|----|-------------|-------------|-------------|
| N  | 2.01286100  | -1.05966800 | 1.26839600  |
| H  | 2.65932100  | -1.34946800 | 0.52954600  |
| H  | 1.65590700  | -1.90807600 | 1.71504700  |
| H  | 2.53224600  | -0.52143200 | 1.96630700  |
| C  | 0.89145700  | -0.23986400 | 0.71079600  |
| H  | 0.17125300  | -0.10378500 | 1.51463800  |
| C  | 1.41742000  | 1.13751600  | 0.24953100  |
| C  | 0.26057100  | -1.05614700 | -0.40399600 |
| H  | 1.97806600  | 1.51431200  | 1.11033100  |
| C  | 2.35845100  | 1.05454700  | -0.94996000 |
| C  | 0.26957300  | 2.10362800  | -0.01790400 |
| O  | 0.87274100  | -1.89213000 | -1.02818200 |
| H  | 1.82874800  | 0.72349500  | -1.84523700 |
| H  | 2.76796800  | 2.04483300  | -1.15114000 |
| H  | 3.20075000  | 0.38216900  | -0.78135200 |
| H  | -0.41476800 | 2.15523500  | 0.83262600  |
| H  | 0.66446200  | 3.10470300  | -0.19221900 |
| H  | -0.30036500 | 1.81199700  | -0.90310200 |
| O  | -1.00761200 | -0.78505400 | -0.67628900 |
| Fe | -2.34382600 | 0.11473400  | 0.17041300  |

## Molecule: Hg-VAL-02

|    |             |             |             |
|----|-------------|-------------|-------------|
| N  | 2.80005500  | -0.96426000 | 1.41264300  |
| H  | 3.47534700  | -1.33858300 | 0.73967300  |
| H  | 2.40431100  | -1.75582700 | 1.92382700  |
| H  | 3.28668500  | -0.35897400 | 2.07730300  |
| C  | 1.72643800  | -0.20953700 | 0.69127600  |
| H  | 0.90839300  | -0.07826500 | 1.39570700  |
| C  | 2.25521800  | 1.17594500  | 0.27092000  |
| C  | 1.27861700  | -1.08713300 | -0.47912700 |
| H  | 2.62321500  | 1.62298100  | 1.19985800  |
| C  | 3.41168200  | 1.10694500  | -0.72497900 |
| C  | 1.12917400  | 2.05800600  | -0.25652600 |
| O  | 2.09184300  | -1.85355500 | -0.99316700 |
| H  | 3.09047300  | 0.67645900  | -1.67519800 |
| H  | 3.77887900  | 2.11518900  | -0.91949500 |
| H  | 4.25335700  | 0.52087600  | -0.35141800 |
| H  | 0.28350000  | 2.08540800  | 0.43704800  |
| H  | 1.49266900  | 3.07826000  | -0.38484500 |
| H  | 0.76916600  | 1.70745100  | -1.22487000 |
| O  | 0.06903900  | -0.98659800 | -0.92890100 |
| Hg | -1.52575300 | 0.03663400  | 0.06576300  |

## Molecule: Fe-VAL-031

|    |             |             |             |
|----|-------------|-------------|-------------|
| N  | 0.34214700  | -0.11451800 | 2.01560200  |
| H  | -0.41522500 | -0.74366000 | 1.73445000  |
| H  | -0.07398800 | 0.66649600  | 2.52955100  |
| H  | 0.95835300  | -0.62524600 | 2.65354500  |
| C  | 1.13562300  | 0.37191800  | 0.84176100  |
| H  | 1.92297000  | 1.00087100  | 1.25029300  |
| C  | 1.77670400  | -0.81713400 | 0.09547800  |
| C  | 0.29693600  | 1.26179000  | -0.06141000 |
| H  | 2.32282600  | -1.36064600 | 0.87255600  |
| C  | 0.76283000  | -1.76828700 | -0.54030100 |
| C  | 2.79278900  | -0.31728800 | -0.92799800 |
| O  | -1.01302500 | 1.01852400  | -0.08874100 |
| H  | 0.16354000  | -1.26172800 | -1.30417500 |
| H  | 1.29380200  | -2.58516100 | -1.03004000 |
| H  | 0.08709300  | -2.22042300 | 0.18767900  |
| H  | 3.49035000  | 0.39229500  | -0.48065000 |
| H  | 3.36452700  | -1.16248700 | -1.31133400 |
| H  | 2.30415700  | 0.16917200  | -1.77332800 |
| O  | 0.78759800  | 2.13992000  | -0.72546700 |
| Fe | -2.17689700 | -0.35082400 | -0.28343400 |

## Molecule: Hg-VAL-01

|    |             |             |             |
|----|-------------|-------------|-------------|
| N  | 1.24026200  | 0.10368100  | 2.02027900  |
| H  | 0.47323200  | -0.54617000 | 1.82988400  |
| H  | 0.83134300  | 0.95701600  | 2.40738500  |
| H  | 1.84196200  | -0.31930300 | 2.73010300  |
| C  | 2.04352100  | 0.39734700  | 0.78706300  |
| H  | 2.89897000  | 0.97188200  | 1.13604100  |
| C  | 2.55464500  | -0.91915900 | 0.16722600  |
| C  | 1.28513300  | 1.30879400  | -0.17693800 |
| H  | 2.92772600  | -1.50010100 | 1.01619100  |
| C  | 1.46635100  | -1.72882400 | -0.53434900 |
| C  | 3.73300300  | -0.65862400 | -0.76783000 |
| O  | -0.00476000 | 1.45519100  | -0.06421400 |
| H  | 1.11829100  | -1.21615200 | -1.43386100 |
| H  | 1.86334000  | -2.69926200 | -0.83450800 |
| H  | 0.60205800  | -1.91951800 | 0.11016500  |
| H  | 4.50493900  | -0.06292700 | -0.27772100 |
| H  | 4.17541100  | -1.60895400 | -1.06905900 |
| H  | 3.41559600  | -0.13345300 | -1.66921300 |
| O  | 1.94305900  | 1.93992400  | -0.99506800 |
| Hg | -1.44171300 | -0.12758700 | -0.08080200 |

## Molecule: Mn-VAL-11

|    |             |             |             |
|----|-------------|-------------|-------------|
| N  | 1.74729200  | 1.94632600  | -0.31142400 |
| H  | 1.51345400  | 2.14710700  | 0.66373900  |
| H  | 1.23884000  | 2.61786800  | -0.89007200 |
| H  | 2.74951500  | 2.08824400  | -0.45167100 |
| C  | 1.35566500  | 0.54067100  | -0.66053500 |
| H  | 1.50276000  | 0.43713300  | -1.73274100 |
| C  | 2.26294000  | -0.45549000 | 0.08929000  |
| C  | -0.12240100 | 0.37594500  | -0.32642800 |
| H  | 3.27996200  | -0.07126400 | -0.03724700 |
| C  | 1.95768500  | -0.53561800 | 1.58458900  |
| C  | 2.20799900  | -1.83511900 | -0.55944800 |
| O  | -0.63257900 | 1.14823100  | 0.51728200  |
| H  | 0.96943700  | -0.96615500 | 1.76090900  |
| H  | 2.69317500  | -1.17688700 | 2.07166500  |
| H  | 1.99570600  | 0.43816600  | 2.07655200  |
| H  | 2.43722400  | -1.78113700 | -1.62507400 |
| H  | 2.94116900  | -2.48950200 | -0.08570400 |
| H  | 1.22417000  | -2.29122300 | -0.44273900 |
| O  | -0.75687700 | -0.55392300 | -0.90527800 |
| Mn | -2.78528500 | -0.23493700 | 0.12846100  |

## Molecule: Ni-VAL-01

|    |             |             |             |
|----|-------------|-------------|-------------|
| N  | 1.53586900  | 2.03222700  | -0.27381000 |
| H  | 1.37532100  | 2.19645400  | 0.72350300  |
| H  | 0.92097400  | 2.66269200  | -0.79432200 |
| H  | 2.50655400  | 2.27597900  | -0.48546700 |
| C  | 1.28675600  | 0.60140400  | -0.63925100 |
| H  | 1.45335400  | 0.52086300  | -1.71196200 |
| C  | 2.27052300  | -0.32917600 | 0.10773800  |
| C  | -0.15450200 | 0.27568900  | -0.36191700 |
| H  | 3.24177500  | 0.16463700  | 0.01333900  |
| C  | 1.93633100  | -0.48472800 | 1.59088900  |
| C  | 2.36722500  | -1.68471800 | -0.58661900 |
| O  | -0.87568300 | 1.04081500  | 0.35229900  |
| H  | 0.99647200  | -1.02499000 | 1.72627000  |
| H  | 2.72304300  | -1.05952900 | 2.07991000  |
| H  | 1.85824000  | 0.47265300  | 2.11008200  |
| H  | 2.59773500  | -1.57274100 | -1.64716400 |
| H  | 3.16203200  | -2.27002300 | -0.12297100 |
| H  | 1.43772200  | -2.24674900 | -0.49258800 |
| O  | -0.67734000 | -0.78528300 | -0.82004400 |
| Ni | -2.38707600 | -0.23785400 | 0.12839100  |

## Molecule: Mn-VAL-21

|    |             |             |             |
|----|-------------|-------------|-------------|
| N  | 1.91167000  | -0.94160600 | 1.38476200  |
| H  | 2.54334700  | -1.33349400 | 0.67945900  |
| H  | 1.54218600  | -1.72157200 | 1.93085200  |
| H  | 2.43363600  | -0.32336600 | 2.00886100  |
| C  | 0.80238100  | -0.21079400 | 0.69072400  |
| H  | -0.00299300 | -0.10236700 | 1.41308700  |
| C  | 1.28788200  | 1.18820300  | 0.26663400  |
| C  | 0.33882700  | -1.09483300 | -0.47619200 |
| H  | 1.67055100  | 1.64417800  | 1.18564300  |
| C  | 2.41835200  | 1.14932700  | -0.75986000 |
| C  | 0.13009600  | 2.04906100  | -0.22875800 |
| O  | 1.16769200  | -1.87073300 | -0.98006400 |
| H  | 2.08083400  | 0.71509800  | -1.70276300 |
| H  | 2.76038000  | 2.16532900  | -0.96083500 |
| H  | 3.28142200  | 0.57864800  | -0.41180500 |
| H  | -0.68821600 | 2.07907400  | 0.49746400  |
| H  | 0.47416400  | 3.07243200  | -0.38292300 |
| H  | -0.26300500 | 1.68223700  | -1.17796800 |
| O  | -0.86363500 | -0.95907200 | -0.86438200 |
| Mn | -2.46046700 | 0.09150800  | 0.20111500  |

## Molecule: Ni-VAL-02

|    |             |             |             |
|----|-------------|-------------|-------------|
| N  | 1.94701000  | -1.13662000 | 1.29001800  |
| H  | 2.56276300  | -1.49972600 | 0.55781000  |
| H  | 1.52407800  | -1.93814600 | 1.76380400  |
| H  | 2.50866500  | -0.61827300 | 1.96994500  |
| C  | 0.89588700  | -0.25283600 | 0.69698700  |
| H  | 0.15811300  | -0.08041400 | 1.47745800  |
| C  | 1.51525700  | 1.09854000  | 0.28423200  |
| C  | 0.25436500  | -1.02105900 | -0.45501400 |
| H  | 1.98840500  | 1.47079300  | 1.19784400  |
| C  | 2.58505000  | 0.96913500  | -0.79759500 |
| C  | 0.43648600  | 2.09740100  | -0.12475900 |
| O  | 0.89796300  | -1.84764700 | -1.08083700 |
| H  | 2.15758800  | 0.61059400  | -1.73571300 |
| H  | 3.02624200  | 1.94911300  | -0.98288900 |
| H  | 3.39745400  | 0.29835500  | -0.51159600 |
| H  | -0.36090600 | 2.15311000  | 0.62238900  |
| H  | 0.87541600  | 3.09034700  | -0.22561700 |
| H  | -0.00853100 | 1.82835600  | -1.08413700 |
| O  | -0.98829500 | -0.74133400 | -0.75355800 |
| Ni | -2.31635600 | 0.14489200  | 0.17759400  |

## Molecule: Mn-VAL-31

|    |             |             |             |
|----|-------------|-------------|-------------|
| N  | 0.30717100  | 0.10489800  | 1.99341200  |
| H  | -0.55079500 | -0.37894800 | 1.72424400  |
| H  | 0.03024300  | 0.95869700  | 2.48069700  |
| H  | 0.82601200  | -0.48872100 | 2.64450800  |
| C  | 1.14813100  | 0.42700900  | 0.79165800  |
| H  | 1.97773900  | 1.02309400  | 1.16518800  |
| C  | 1.71115000  | -0.87510800 | 0.18875600  |
| C  | 0.34126400  | 1.30460100  | -0.17679100 |
| H  | 2.17060400  | -1.39869300 | 1.03327300  |
| C  | 0.64529100  | -1.78747800 | -0.41458500 |
| C  | 2.81360500  | -0.57847300 | -0.82396900 |
| O  | -0.93060600 | 1.30282200  | -0.06281500 |
| H  | 0.18907100  | -1.32827900 | -1.29642300 |
| H  | 1.09403500  | -2.73156200 | -0.72388300 |
| H  | -0.15315600 | -2.02383800 | 0.29568000  |
| H  | 3.57518500  | 0.08022200  | -0.40316600 |
| H  | 3.29564200  | -1.51103900 | -1.12094100 |
| H  | 2.41158400  | -0.10565400 | -1.72024300 |
| O  | 0.98389000  | 1.97854600  | -0.99151600 |
| Mn | -2.29597100 | -0.40095300 | -0.27954300 |

## Molecule: Ni-VAL-031

|    |             |             |             |
|----|-------------|-------------|-------------|
| N  | 0.42323800  | -0.06010700 | 2.02928200  |
| H  | -0.30091600 | -0.74660400 | 1.80518100  |
| H  | -0.02652400 | 0.72979600  | 2.49803800  |
| H  | 1.07240800  | -0.49727300 | 2.68746600  |
| C  | 1.17540900  | 0.39363700  | 0.81189300  |
| H  | 1.95785600  | 1.04863800  | 1.18714400  |
| C  | 1.83715600  | -0.81146900 | 0.11346500  |
| C  | 0.30146100  | 1.25018600  | -0.10424100 |
| H  | 2.33694200  | -1.36098800 | 0.91738700  |
| C  | 0.84496600  | -1.74852000 | -0.56887400 |
| C  | 2.90895900  | -0.34483600 | -0.86765000 |
| O  | -0.99298100 | 1.08876600  | -0.10165000 |
| H  | 0.33407200  | -1.24709600 | -1.39711000 |
| H  | 1.37048400  | -2.61146200 | -0.97830300 |
| H  | 0.08410900  | -2.13315400 | 0.11693100  |
| H  | 3.62670700  | 0.32086500  | -0.38612500 |
| H  | 3.44996800  | -1.21092600 | -1.25048000 |
| H  | 2.47017500  | 0.17991400  | -1.71726400 |
| O  | 0.84601500  | 2.09930400  | -0.79265800 |
| Ni | -2.16321100 | -0.35676800 | -0.24431900 |

## Molecule: Zn-VAL-02

|    |             |             |             |
|----|-------------|-------------|-------------|
| N  | -2.08890400 | -0.96178700 | -1.30891200 |
| H  | -2.69664000 | -1.31764200 | -0.56521600 |
| H  | -1.75829500 | -1.76636600 | -1.84463000 |
| H  | -2.63047700 | -0.35581800 | -1.92883400 |
| C  | -0.93620000 | -0.21933300 | -0.70049300 |
| H  | -0.18882800 | -0.10993900 | -1.48260200 |
| C  | -1.40892600 | 1.17872700  | -0.25096900 |
| C  | -0.38406000 | -1.10451200 | 0.42391900  |
| H  | -1.86081000 | 1.61749400  | -1.14641700 |
| C  | -2.46275300 | 1.14288200  | 0.85471800  |
| C  | -0.23364100 | 2.06317600  | 0.14959200  |
| O  | -1.15942000 | -1.86898900 | 1.00491600  |
| H  | -2.05536700 | 0.72274200  | 1.77595100  |
| H  | -2.79329700 | 2.16024500  | 1.06778200  |
| H  | -3.34634500 | 0.56559400  | 0.57743700  |
| H  | 0.54075200  | 2.07227800  | -0.62335700 |
| H  | -0.57419900 | 3.08879200  | 0.29389700  |
| H  | 0.21693400  | 1.72499300  | 1.08466800  |
| O  | 0.86173900  | -1.00576900 | 0.71787300  |
| Zn | 2.22346100  | 0.09875200  | -0.15630700 |

## Molecule: Zn-VAL-011

|    |             |             |             |
|----|-------------|-------------|-------------|
| N  | 1.79957700  | 1.97002300  | -0.28172700 |
| H  | 1.62322400  | 2.15203100  | 0.70895200  |
| H  | 1.25514000  | 2.64906000  | -0.81790100 |
| H  | 2.79220400  | 2.12316100  | -0.47180500 |
| C  | 1.41220800  | 0.56678100  | -0.64165800 |
| H  | 1.55042600  | 0.47601700  | -1.71690700 |
| C  | 2.33212500  | -0.43621400 | 0.08656300  |
| C  | -0.06005900 | 0.38925800  | -0.31511100 |
| H  | 3.34091500  | -0.02722600 | -0.02456700 |
| C  | 2.02014000  | -0.55826700 | 1.57758200  |
| C  | 2.31115100  | -1.79732700 | -0.60209700 |
| O  | -0.64299400 | 1.22426200  | 0.41095400  |
| H  | 1.03253100  | -0.99632600 | 1.73914000  |
| H  | 2.75460800  | -1.21138300 | 2.04995800  |
| H  | 2.05595900  | 0.40255300  | 2.09508500  |
| H  | 2.53997000  | -1.70636400 | -1.66528400 |
| H  | 3.06071900  | -2.44554800 | -0.14613500 |
| H  | 1.33962400  | -2.28156100 | -0.50011400 |
| O  | -0.65496000 | -0.63200300 | -0.78562100 |
| Zn | -2.45507100 | -0.22160100 | 0.10291100  |

## Molecule: Zn-VAL-031

|    |             |             |             |
|----|-------------|-------------|-------------|
| N  | 0.41887700  | 0.06911300  | 2.01657200  |
| H  | -0.38798400 | -0.51079500 | 1.77771200  |
| H  | 0.06296000  | 0.90361400  | 2.48690000  |
| H  | 1.00753600  | -0.44774600 | 2.67386400  |
| C  | 1.21056700  | 0.44056600  | 0.79737500  |
| H  | 2.01826200  | 1.07603800  | 1.15333500  |
| C  | 1.82391300  | -0.82333100 | 0.16353400  |
| C  | 0.34829500  | 1.28558500  | -0.14289300 |
| H  | 2.34023200  | -1.32547300 | 0.98772000  |
| C  | 0.79158900  | -1.78940800 | -0.41444000 |
| C  | 2.87081700  | -0.45026200 | -0.88330100 |
| O  | -0.93654500 | 1.20626300  | -0.01924600 |
| H  | 0.24531900  | -1.33037500 | -1.24414200 |
| H  | 1.29449100  | -2.67738400 | -0.79874000 |
| H  | 0.06739100  | -2.12900700 | 0.33107600  |
| H  | 3.59959100  | 0.25745400  | -0.48472900 |
| H  | 3.40426900  | -1.34727900 | -1.20011900 |
| H  | 2.40891400  | -0.00376700 | -1.76453700 |
| O  | 0.91792800  | 2.02993700  | -0.93569400 |
| Zn | -2.03717600 | -0.36058600 | -0.25054900 |



## Molecule: Cd-ALA-01

|    |             |             |             |
|----|-------------|-------------|-------------|
| N  | -2.92715100 | -1.24203600 | -0.14883100 |
| H  | -2.57226000 | -1.62096700 | 0.73327800  |
| H  | -2.61122700 | -1.86012300 | -0.89916400 |
| H  | -3.94892200 | -1.25662200 | -0.12408700 |
| C  | -2.42886100 | 0.15602700  | -0.35310500 |
| H  | -2.74397000 | 0.45858600  | -1.34890500 |
| C  | -3.02306100 | 1.07038400  | 0.70648100  |
| C  | -0.90857000 | 0.16064700  | -0.29355100 |
| H  | -2.70070900 | 0.76713300  | 1.70379500  |
| H  | -2.69567400 | 2.09201300  | 0.52512200  |
| H  | -4.11174300 | 1.03838000  | 0.65797900  |
| O  | -0.33229300 | -0.84478400 | 0.22563600  |
| O  | -0.29457000 | 1.16083000  | -0.71907800 |
| Cd | 1.77192600  | -0.03697600 | 0.07046600  |

## Molecule: Cu-ALA-012

|    |             |             |             |
|----|-------------|-------------|-------------|
| N  | -2.41739200 | -1.20442800 | -0.02121400 |
| H  | -2.23872100 | -1.42179400 | 0.96338200  |
| H  | -2.00939600 | -1.95307000 | -0.58615600 |
| H  | -3.42943600 | -1.20075600 | -0.16954100 |
| C  | -1.84597700 | 0.13079200  | -0.38326400 |
| H  | -2.09359300 | 0.30469700  | -1.43009800 |
| C  | -2.44312000 | 1.21242300  | 0.50384200  |
| C  | -0.34574200 | 0.06869300  | -0.25809500 |
| H  | -2.17909700 | 1.04178800  | 1.54841000  |
| H  | -2.06253800 | 2.18317000  | 0.19452200  |
| H  | -3.52796100 | 1.21340500  | 0.40192200  |
| O  | 0.23340800  | -0.99354800 | 0.12907000  |
| O  | 0.36303500  | 1.08376900  | -0.50533000 |
| Cu | 1.98275800  | -0.03205700 | 0.10556000  |

## Molecule: Cd-ALA-022

|    |             |             |             |
|----|-------------|-------------|-------------|
| N  | 3.07510600  | -0.59132900 | -0.65718200 |
| H  | 3.65393800  | -0.23500500 | 0.10739800  |
| H  | 3.25717900  | -0.00695800 | -1.47534300 |
| H  | 3.35668500  | -1.55124200 | -0.86682500 |
| C  | 1.63028400  | -0.54144900 | -0.26714500 |
| H  | 1.05858400  | -0.82671400 | -1.14841600 |
| C  | 1.38512500  | -1.51080500 | 0.87731000  |
| C  | 1.28490800  | 0.89977400  | 0.11567200  |
| H  | 1.94880700  | -1.21371700 | 1.76299000  |
| H  | 0.32527800  | -1.52450400 | 1.12587900  |
| H  | 1.67767400  | -2.52061400 | 0.58807900  |
| O  | 2.20285900  | 1.70814600  | 0.29138100  |
| O  | 0.04515400  | 1.19189600  | 0.25608000  |
| Cd | -1.67895600 | -0.08890400 | -0.08808700 |

## Molecule: Cu-ALA-022

|    |             |             |             |
|----|-------------|-------------|-------------|
| N  | -2.69884000 | -0.41400700 | 0.50736600  |
| H  | -3.15036700 | -0.09481800 | -0.35390400 |
| H  | -2.92662600 | 0.26286200  | 1.23868900  |
| H  | -3.08877800 | -1.32309600 | 0.76411900  |
| C  | -1.21804900 | -0.51500500 | 0.30952600  |
| H  | -0.79057200 | -0.77566600 | 1.27649900  |
| C  | -0.91511200 | -1.58952100 | -0.72333900 |
| C  | -0.71532000 | 0.86800800  | -0.10021900 |
| H  | -1.28478100 | -1.29910600 | -1.70756300 |
| H  | 0.15971800  | -1.75526700 | -0.78664400 |
| H  | -1.38220300 | -2.52969300 | -0.42918400 |
| O  | 0.56247000  | 1.04808900  | -0.17139300 |
| O  | -1.51547700 | 1.76445400  | -0.35124300 |
| Cu | 1.93346300  | -0.16097900 | 0.12799000  |

## Molecule: Cd-ALA-031

|    |             |             |             |
|----|-------------|-------------|-------------|
| N  | -1.36836400 | -1.55730600 | -0.53514000 |
| H  | -0.78081200 | -1.69209400 | 0.29217900  |
| H  | -0.75475900 | -1.49637000 | -1.35012300 |
| H  | -1.97020700 | -2.37719000 | -0.64213600 |
| C  | -2.19658800 | -0.31584000 | -0.37903500 |
| H  | -2.73177800 | -0.18026600 | -1.31438000 |
| C  | -3.15759800 | -0.49944700 | 0.78510300  |
| C  | -1.29589300 | 0.89689400  | -0.12598400 |
| H  | -2.60752500 | -0.63379000 | 1.71786700  |
| H  | -3.78769000 | 0.38404700  | 0.87376700  |
| H  | -3.79673400 | -1.36721500 | 0.61894500  |
| O  | -0.24260700 | 0.69631500  | 0.58653200  |
| O  | -1.68507300 | 1.99403800  | -0.52475400 |
| Cd | 1.69437400  | -0.07809300 | 0.02864900  |

## Molecule: Cu-ALA-032

|    |             |             |             |
|----|-------------|-------------|-------------|
| N  | -1.05921300 | -1.56803200 | -0.48442300 |
| H  | -0.56590700 | -1.78618200 | 0.38514100  |
| H  | -0.37617300 | -1.58288100 | -1.24514500 |
| H  | -1.75157700 | -2.30137200 | -0.65580100 |
| C  | -1.73292200 | -0.23199500 | -0.38479800 |
| H  | -2.19928200 | -0.04545700 | -1.34843100 |
| C  | -2.76551700 | -0.25996600 | 0.73147200  |
| C  | -0.70144600 | 0.86338100  | -0.12719900 |
| H  | -2.28749900 | -0.45435000 | 1.69275600  |
| H  | -3.27209800 | 0.70242000  | 0.77742900  |
| H  | -3.50681900 | -1.03556100 | 0.53745900  |
| O  | 0.31921000  | 0.51046700  | 0.59807000  |
| O  | -0.91174500 | 1.99968700  | -0.52190000 |
| Cu | 1.97632500  | -0.16655700 | 0.04556400  |

## Molecule: Fe-ALA-01

|    |             |             |             |
|----|-------------|-------------|-------------|
| N  | -2.46801000 | -1.12604800 | -0.02387800 |
| H  | -2.29380600 | -1.37994400 | 0.95340100  |
| H  | -2.16742500 | -1.90337400 | -0.61775600 |
| H  | -3.47764200 | -1.00202700 | -0.14196000 |
| C  | -1.77536000 | 0.14645500  | -0.38243100 |
| H  | -2.00008700 | 0.35407400  | -1.42866300 |
| C  | -2.25073100 | 1.28715600  | 0.51106500  |
| C  | -0.29231500 | -0.02128000 | -0.25617800 |
| H  | -2.02329200 | 1.07414200  | 1.55620800  |
| H  | -1.74761200 | 2.20545200  | 0.21673700  |
| H  | -3.32484300 | 1.41828200  | 0.39003400  |
| O  | 0.27723400  | -1.05354400 | 0.20252100  |
| O  | 0.47434500  | 0.95282400  | -0.55932100 |
| Fe | 2.08494500  | -0.02125000 | 0.10995400  |

## Molecule: Fe-ALA-023

|    |             |             |             |
|----|-------------|-------------|-------------|
| N  | 2.67927400  | -0.35705900 | -0.48900300 |
| H  | 3.11626400  | -0.04507100 | 0.38319800  |
| H  | 2.89946000  | 0.33524000  | -1.20970700 |
| H  | 3.09512900  | -1.25160000 | -0.75852100 |
| C  | 1.20109100  | -0.50383000 | -0.31936700 |
| H  | 0.79446100  | -0.75555000 | -1.29797000 |
| C  | 0.89789700  | -1.60178400 | 0.69186700  |
| C  | 0.65724100  | 0.85668500  | 0.09213200  |
| H  | 1.24265500  | -1.31889500 | 1.68695200  |
| H  | -0.17269300 | -1.80341500 | 0.73190900  |
| H  | 1.39817900  | -2.52065000 | 0.38581700  |
| O  | 1.37033900  | 1.78017700  | 0.40929600  |
| O  | -0.66453200 | 0.98647200  | 0.07460000  |
| Fe | -2.05046900 | -0.18385600 | -0.12144700 |

## Molecule: Fe-ALA-031

|    |             |             |             |
|----|-------------|-------------|-------------|
| N  | -0.90405800 | -1.56484500 | -0.57768200 |
| H  | -0.31919900 | -1.79469900 | 0.23042300  |
| H  | -0.30133000 | -1.49340200 | -1.40167000 |
| H  | -1.55722000 | -2.33881100 | -0.72708000 |
| C  | -1.67146400 | -0.30104000 | -0.34785200 |
| H  | -2.27232300 | -0.13333500 | -1.23862100 |
| C  | -2.54937000 | -0.45233400 | 0.88534300  |
| C  | -0.75079400 | 0.89959100  | -0.19715200 |
| H  | -1.94088400 | -0.64492400 | 1.76995900  |
| H  | -3.12003000 | 0.46140900  | 1.03735700  |
| H  | -3.24391100 | -1.27937600 | 0.73823600  |
| O  | 0.48245200  | 0.65790100  | 0.22810000  |
| O  | -1.14979500 | 2.02283000  | -0.38175100 |
| Fe | 2.08660800  | -0.15946500 | 0.10855200  |

## Molecule: Hg-ALA-01

|    |             |             |             |
|----|-------------|-------------|-------------|
| N  | -3.79000000 | -0.93109500 | -0.14533900 |
| H  | -3.65428700 | -1.27968600 | 0.80723000  |
| H  | -3.58160000 | -1.69854400 | -0.78745900 |
| H  | -4.77022700 | -0.66382400 | -0.25963000 |
| C  | -2.89925100 | 0.24596700  | -0.39546100 |
| H  | -3.01992900 | 0.51757800  | -1.44113800 |
| C  | -3.29949500 | 1.39135600  | 0.52028700  |
| C  | -1.45749500 | -0.18957600 | -0.13963100 |
| H  | -3.15497900 | 1.11672600  | 1.56640800  |
| H  | -2.68991300 | 2.26427700  | 0.29763600  |
| H  | -4.34746000 | 1.64670600  | 0.36074700  |
| O  | -1.22336800 | -1.23218300 | 0.46793300  |
| O  | -0.58425400 | 0.64803100  | -0.58108500 |
| Hg | 1.40183500  | 0.00751500  | 0.01834500  |

## Molecule: Hg-ALA-02

|    |             |             |             |
|----|-------------|-------------|-------------|
| N  | 3.44748400  | -0.59377100 | -0.67224000 |
| H  | 4.04173800  | -0.23827000 | 0.08115100  |
| H  | 3.61474100  | -0.01162700 | -1.49563700 |
| H  | 3.72379700  | -1.55454100 | -0.88571000 |
| C  | 2.01015000  | -0.54610900 | -0.25924100 |
| H  | 1.42264700  | -0.83398300 | -1.12926300 |
| C  | 1.77731900  | -1.50865100 | 0.89490900  |
| C  | 1.67881700  | 0.89405100  | 0.12000000  |
| H  | 2.34794500  | -1.20408800 | 1.77336700  |
| H  | 0.71815000  | -1.52132200 | 1.14817800  |
| H  | 2.07103100  | -2.51816900 | 0.60669700  |
| O  | 2.58586800  | 1.70808300  | 0.27794300  |
| O  | 0.43815500  | 1.22195400  | 0.29250000  |
| Hg | -1.23827900 | -0.05547100 | -0.05613300 |

## Molecule: Hg-ALA-031

|    |             |             |             |
|----|-------------|-------------|-------------|
| N  | -1.64865400 | -1.58445300 | -0.63080500 |
| H  | -0.98751400 | -1.75393800 | 0.13392900  |
| H  | -1.10827100 | -1.43746400 | -1.48642900 |
| H  | -2.22084700 | -2.42428800 | -0.74855100 |
| C  | -2.52665800 | -0.41029000 | -0.33048200 |
| H  | -3.19250600 | -0.31437100 | -1.18347600 |
| C  | -3.31449900 | -0.69677500 | 0.94133500  |
| C  | -1.78215900 | 0.92193400  | -0.18439400 |
| H  | -2.64245500 | -0.80007400 | 1.79460700  |
| H  | -4.00650100 | 0.12070800  | 1.13261000  |
| H  | -3.88679200 | -1.61781800 | 0.82484800  |
| O  | -0.59675200 | 1.00529000  | 0.33680600  |
| O  | -2.43394800 | 1.92850400  | -0.44926100 |
| Hg | 1.24463700  | -0.03801400 | 0.02861200  |

## Molecule: Mn-ALA-012

|    |             |             |             |
|----|-------------|-------------|-------------|
| N  | -2.47874500 | -1.17725000 | -0.09215800 |
| H  | -2.33268400 | -1.44112700 | 0.88524900  |
| H  | -2.06231800 | -1.90675900 | -0.67359500 |
| H  | -3.48420200 | -1.14503400 | -0.27405100 |
| C  | -1.85508200 | 0.15586100  | -0.37305600 |
| H  | -2.06485100 | 0.37998400  | -1.41740100 |
| C  | -2.46490200 | 1.20807800  | 0.53672800  |
| C  | -0.34639100 | 0.04677500  | -0.19968400 |
| H  | -2.25227000 | 0.98261000  | 1.58321400  |
| H  | -2.04262000 | 2.18088600  | 0.29442200  |
| H  | -3.54469200 | 1.25227700  | 0.39268700  |
| O  | 0.14397100  | -1.01357000 | 0.26616900  |
| O  | 0.34547900  | 1.04490900  | -0.53719200 |
| Mn | 2.36870000  | -0.03108300 | 0.08955300  |

## Molecule: Ni-ALA-01

|    |             |             |             |
|----|-------------|-------------|-------------|
| N  | -2.40673100 | -1.18998200 | -0.09322500 |
| H  | -2.26594000 | -1.44849400 | 0.88770300  |
| H  | -1.99381600 | -1.92289300 | -0.67529700 |
| H  | -3.41324300 | -1.16120200 | -0.27493600 |
| C  | -1.80441000 | 0.14781500  | -0.38313400 |
| H  | -2.00911200 | 0.36782200  | -1.42999800 |
| C  | -2.41543300 | 1.20644500  | 0.52253800  |
| C  | -0.31246500 | 0.06352600  | -0.21022300 |
| H  | -2.19632000 | 0.99043200  | 1.56893300  |
| H  | -2.00360600 | 2.17993500  | 0.26577100  |
| H  | -3.49473700 | 1.23224700  | 0.37602900  |
| O  | 0.24321800  | -0.97402700 | 0.26532600  |
| O  | 0.42396000  | 1.04629200  | -0.52423900 |
| Ni | 2.00286800  | -0.03545700 | 0.08680700  |

## Molecule: Mn-ALA-021

|    |             |             |             |
|----|-------------|-------------|-------------|
| N  | 2.59896500  | -0.54665900 | -0.58895400 |
| H  | 3.11338700  | -0.17340900 | 0.21259800  |
| H  | 2.81666200  | 0.04705000  | -1.39119200 |
| H  | 2.92376900  | -1.49596500 | -0.78178700 |
| C  | 1.12954600  | -0.53441400 | -0.29289700 |
| H  | 0.62328900  | -0.81053300 | -1.21579700 |
| C  | 0.83055000  | -1.53648100 | 0.80885200  |
| C  | 0.73260200  | 0.89491400  | 0.09634500  |
| H  | 1.33062100  | -1.25329900 | 1.73638300  |
| H  | -0.24241500 | -1.57513500 | 0.98996600  |
| H  | 1.16138100  | -2.53357100 | 0.51590000  |
| O  | 1.63215900  | 1.71056900  | 0.34988400  |
| O  | -0.51328600 | 1.14491900  | 0.14732000  |
| Mn | -2.20106500 | -0.16666200 | -0.14379300 |

## Molecule: Ni-ALA-21

|    |             |             |             |
|----|-------------|-------------|-------------|
| N  | 2.67550800  | -0.35032900 | -0.62658900 |
| H  | 3.19991600  | -0.02783900 | 0.19108300  |
| H  | 2.81076600  | 0.33726400  | -1.37115500 |
| H  | 3.06681000  | -1.24420100 | -0.93298000 |
| C  | 1.22797900  | -0.50779100 | -0.28945600 |
| H  | 0.72447800  | -0.82623500 | -1.20124200 |
| C  | 1.07299500  | -1.55101600 | 0.80682000  |
| C  | 0.68794400  | 0.85379300  | 0.12489300  |
| H  | 1.58376600  | -1.23358000 | 1.71658400  |
| H  | 0.01799900  | -1.70238200 | 1.03256900  |
| H  | 1.48886200  | -2.50119100 | 0.47206700  |
| O  | 1.44211300  | 1.77461600  | 0.39073400  |
| O  | -0.61297000 | 0.98109400  | 0.19434500  |
| Ni | -2.00670700 | -0.18446900 | -0.14482000 |

## Molecule: Mn-ALA-32

|    |             |             |             |
|----|-------------|-------------|-------------|
| N  | -0.64014500 | -1.53917200 | -0.57477200 |
| H  | -0.04909800 | -1.66771300 | 0.25131100  |
| H  | -0.02504200 | -1.34013500 | -1.36637900 |
| H  | -1.13567300 | -2.41429400 | -0.75489400 |
| C  | -1.60986300 | -0.41922100 | -0.35330200 |
| H  | -2.20519500 | -0.35740300 | -1.26219100 |
| C  | -2.49089000 | -0.75950500 | 0.83647400  |
| C  | -0.88982500 | 0.92720100  | -0.18258700 |
| H  | -1.89995300 | -0.81252000 | 1.75274500  |
| H  | -3.25541400 | 0.00477500  | 0.95400900  |
| H  | -2.98372100 | -1.71967000 | 0.67670500  |
| O  | 0.37866200  | 0.95917400  | -0.09103900 |
| O  | -1.62645500 | 1.92344100  | -0.14779500 |
| Mn | 2.23843700  | -0.09882500 | 0.15517000  |

## Molecule: Ni-ALA-34

|    |             |             |             |
|----|-------------|-------------|-------------|
| N  | -0.79090200 | -1.63154100 | -0.40598300 |
| H  | -0.32569800 | -1.81666800 | 0.48852600  |
| H  | -0.08850600 | -1.62470200 | -1.15192500 |
| H  | -1.42220500 | -2.41732000 | -0.58846300 |
| C  | -1.57845000 | -0.36303500 | -0.36753500 |
| H  | -2.03073500 | -0.26442700 | -1.35408100 |
| C  | -2.65724900 | -0.47799300 | 0.69846700  |
| C  | -0.74596000 | 0.89828300  | -0.18362000 |
| H  | -2.21362800 | -0.60080100 | 1.68714000  |
| H  | -3.27392900 | 0.41693300  | 0.69183900  |
| H  | -3.28957700 | -1.33855500 | 0.47876900  |
| O  | 0.56651500  | 0.92046800  | -0.06103000 |
| O  | -1.32182200 | 1.96939900  | -0.17923500 |
| Ni | 1.93260700  | -0.15700500 | 0.12958300  |

## Molecule: Zn-ALA-01

|    |             |             |             |
|----|-------------|-------------|-------------|
| N  | -2.95284200 | -0.79182600 | -0.15499900 |
| H  | -2.93904800 | -1.08472300 | 0.82520500  |
| H  | -2.76990600 | -1.61895000 | -0.72647700 |
| H  | -3.88651400 | -0.43853800 | -0.37550900 |
| C  | -1.92452000 | 0.26760100  | -0.39783800 |
| H  | -1.96593000 | 0.50347300  | -1.45943800 |
| C  | -2.24237900 | 1.49358900  | 0.44195800  |
| C  | -0.54647500 | -0.30428900 | -0.07254400 |
| H  | -2.20594400 | 1.25136200  | 1.50560800  |
| H  | -1.51207500 | 2.27236400  | 0.23428200  |
| H  | -3.23412100 | 1.87398700  | 0.19656100  |
| O  | -0.43813500 | -1.40625300 | 0.46732900  |
| O  | 0.40923600  | 0.48590700  | -0.40596200 |
| Zn | 2.25649600  | 0.04683900  | 0.01881200  |

## Molecule: Zn-ALA-02

|    |             |             |             |
|----|-------------|-------------|-------------|
| N  | -2.69225700 | 0.48496800  | -0.56246400 |
| H  | -3.18990100 | 0.14326100  | 0.26366900  |
| H  | -2.91107100 | -0.14820900 | -1.33391500 |
| H  | -3.03836800 | 1.41873100  | -0.79221500 |
| C  | -1.21910300 | 0.52160100  | -0.29356000 |
| H  | -0.73673900 | 0.79535200  | -1.23028200 |
| C  | -0.93291700 | 1.55494200  | 0.78477400  |
| C  | -0.77466900 | -0.88756000 | 0.10623500  |
| H  | -1.41863000 | 1.28045900  | 1.72231600  |
| H  | 0.13993200  | 1.62596300  | 0.95795800  |
| H  | -1.29107900 | 2.53543500  | 0.46980200  |
| O  | -1.62802200 | -1.74501700 | 0.34142000  |
| O  | 0.48981700  | -1.10448700 | 0.18613000  |
| Zn | 1.93191400  | 0.15387900  | -0.13083900 |

## Molecule: Zn-ALA-03

|    |             |             |             |
|----|-------------|-------------|-------------|
| N  | -0.85847100 | -1.57393600 | -0.55585500 |
| H  | -0.26394700 | -1.73211000 | 0.26177200  |
| H  | -0.25250200 | -1.47272900 | -1.37276100 |
| H  | -1.44652500 | -2.40007000 | -0.69013900 |
| C  | -1.71641900 | -0.36007800 | -0.35964700 |
| H  | -2.30094000 | -0.24961200 | -1.26897000 |
| C  | -2.62143200 | -0.57893800 | 0.84358000  |
| C  | -0.88172900 | 0.90831500  | -0.16833100 |
| H  | -2.02846300 | -0.70881800 | 1.75054600  |
| H  | -3.26960400 | 0.28617400  | 0.96822100  |
| H  | -3.24322000 | -1.46189900 | 0.69318500  |
| O  | 0.30032100  | 0.81524900  | 0.32398400  |
| O  | -1.44227500 | 1.97780000  | -0.40867100 |
| Zn | 1.97558700  | -0.11345200 | 0.07776700  |

## Molecule: Cd-ASP-01

|    |             |             |             |
|----|-------------|-------------|-------------|
| N  | -1.39007700 | 2.52559900  | -0.09583400 |
| H  | -1.04251200 | 2.59623700  | -1.05494900 |
| H  | -0.70411200 | 2.97219500  | 0.51554200  |
| H  | -2.27329500 | 3.03624200  | -0.03171000 |
| C  | -1.59575000 | 1.09106100  | 0.29054900  |
| H  | -1.97964300 | 1.09673300  | 1.30846500  |
| C  | -2.60710500 | 0.44278500  | -0.64604700 |
| C  | -0.25630000 | 0.35963800  | 0.28592200  |
| H  | -3.44555000 | 1.13292500  | -0.77788900 |
| H  | -2.16039900 | 0.27043800  | -1.62477100 |
| C  | -3.20483900 | -0.86306500 | -0.09690100 |
| O  | 0.76765100  | 1.04857400  | -0.05549400 |
| O  | -3.50616200 | -0.89462000 | 1.12435100  |
| O  | -3.39779600 | -1.78812700 | -0.92798000 |
| O  | -0.23443600 | -0.83735500 | 0.59643600  |
| Cd | 2.46429100  | -0.31654700 | -0.05340600 |

## Molecule: Cd-ASN-011

|    |             |             |             |
|----|-------------|-------------|-------------|
| N  | 1.48373500  | 2.58715000  | 0.02957000  |
| H  | 1.09684300  | 2.67623600  | 0.97273600  |
| H  | 0.85221800  | 3.07107900  | -0.61286200 |
| H  | 2.39596400  | 3.04942900  | 0.00145400  |
| C  | 1.61593200  | 1.14437700  | -0.34508500 |
| H  | 1.98504800  | 1.11709900  | -1.36692900 |
| C  | 2.60799100  | 0.48118200  | 0.61637900  |
| C  | 0.23996900  | 0.48638500  | -0.29941300 |
| H  | 3.55093200  | 1.02787200  | 0.55923800  |
| H  | 2.22550000  | 0.54266400  | 1.63394000  |
| C  | 2.85327100  | -0.98231400 | 0.29675200  |
| O  | -0.64209300 | 1.04789300  | 0.42608600  |
| O  | 2.38541800  | -1.87784000 | 1.00562900  |
| N  | 3.61146600  | -1.22672300 | -0.77818200 |
| H  | 3.79235400  | -2.17965900 | -1.05561700 |
| H  | 3.97934600  | -0.47622100 | -1.34101500 |
| O  | 0.05078400  | -0.55530800 | -0.94916100 |
| Cd | -2.37084300 | -0.29265100 | 0.02035700  |

## Molecule: Cd-ASN-022

|    |             |             |             |
|----|-------------|-------------|-------------|
| N  | 3.31927900  | -0.44939600 | -0.24583800 |
| H  | 3.29907600  | -0.83828600 | -1.19189100 |
| H  | 3.73090100  | -1.15988800 | 0.36249200  |
| H  | 3.91503200  | 0.38128800  | -0.24331900 |
| C  | 1.93440500  | -0.11511100 | 0.21445800  |
| H  | 2.04036500  | 0.29748000  | 1.21623300  |
| C  | 1.33278100  | 0.93176200  | -0.74337500 |
| C  | 1.13902000  | -1.42955200 | 0.31378200  |
| H  | 2.14870500  | 1.50580600  | -1.18323200 |
| H  | 0.79029300  | 0.44127900  | -1.54985300 |
| C  | 0.39899900  | 1.90860300  | -0.06350700 |
| O  | 1.68673300  | -2.47039800 | -0.06310000 |
| O  | -0.84282400 | 1.75126600  | -0.03616000 |
| N  | 0.95741200  | 2.97323700  | 0.49244300  |
| H  | 0.38233000  | 3.64818400  | 0.97633500  |
| H  | 1.95259200  | 3.12689000  | 0.43810200  |
| O  | -0.02465100 | -1.34855400 | 0.83055000  |
| Cd | -1.74128000 | -0.33963200 | -0.09853300 |

## Molecule: Cd-ASN-031

|    |             |             |             |
|----|-------------|-------------|-------------|
| N  | 4.07892800  | 0.50937700  | -0.36609900 |
| H  | 4.13427200  | -0.13608000 | -1.16105100 |
| H  | 4.79988600  | 0.22818100  | 0.30118900  |
| H  | 4.27450300  | 1.46379300  | -0.67487100 |
| C  | 2.72198000  | 0.38471400  | 0.24815800  |
| H  | 2.77903600  | 0.80858400  | 1.24674600  |
| C  | 1.72990200  | 1.16887300  | -0.61980300 |
| C  | 2.34991700  | -1.11176300 | 0.33254900  |
| H  | 2.03176900  | 2.21733000  | -0.64516600 |
| H  | 1.73678200  | 0.77288100  | -1.63382600 |
| C  | 0.31951100  | 1.07496800  | -0.09695400 |
| O  | 2.98882800  | -1.89528500 | -0.40858500 |
| O  | -0.50632000 | 0.37593500  | -0.73167900 |
| N  | 0.01766300  | 1.75122300  | 0.99586800  |
| H  | -0.91096300 | 1.68480100  | 1.39043700  |
| H  | 0.71728900  | 2.29642600  | 1.47691500  |
| O  | 1.41620700  | -1.38773200 | 1.11875700  |
| Cd | -2.54492300 | -0.22925400 | -0.07750800 |

## Molecule: Cd-ASN-041

|    |             |             |             |
|----|-------------|-------------|-------------|
| N  | -3.04846000 | -0.34722300 | -1.09962400 |
| H  | -3.70419300 | -0.38032900 | -0.31297000 |
| H  | -3.08504400 | -1.25671600 | -1.56560900 |
| H  | -3.34852400 | 0.37315000  | -1.76038600 |
| C  | -1.67021900 | -0.07371600 | -0.59129200 |
| H  | -0.99288100 | -0.21088900 | -1.43039200 |
| C  | -1.63715300 | 1.36687900  | -0.06713200 |
| C  | -1.36131200 | -1.10733400 | 0.50956500  |
| H  | -2.03937600 | 2.02319100  | -0.84594300 |
| H  | -2.27229100 | 1.45671300  | 0.81245600  |
| C  | -0.28004200 | 1.92579000  | 0.29409500  |
| O  | -2.31818300 | -1.62899100 | 1.09228400  |
| O  | -0.07698700 | 2.50370700  | 1.34397100  |
| N  | 0.73947300  | 1.75143700  | -0.63513500 |
| H  | 1.52443700  | 2.38202100  | -0.50843100 |
| H  | 0.45294500  | 1.64195400  | -1.60274200 |
| O  | -0.13630700 | -1.35476000 | 0.76914800  |
| Cd | 1.65775000  | -0.51433200 | -0.14911100 |

## Molecule: Cu-ASN-01

|    |             |             |             |
|----|-------------|-------------|-------------|
| N  | 1.87997200  | 2.37907600  | -0.13948500 |
| H  | 1.68310800  | 2.66151400  | 0.82500200  |
| H  | 1.43104300  | 3.05757100  | -0.75921400 |
| H  | 2.89028300  | 2.41566000  | -0.29561500 |
| C  | 1.35911100  | 1.00231600  | -0.39256000 |
| H  | 1.51700300  | 0.78963500  | -1.44691600 |
| C  | 2.12734800  | 0.01480600  | 0.49476300  |
| C  | -0.13378400 | 0.99222400  | -0.08178900 |
| H  | 3.19168600  | 0.12179100  | 0.27773400  |
| H  | 1.95520600  | 0.26135400  | 1.54159400  |
| C  | 1.71071600  | -1.43051300 | 0.28069400  |
| O  | -0.64025100 | 1.86114600  | 0.62115500  |
| O  | 1.01211400  | -2.02418700 | 1.10709600  |
| N  | 2.15724400  | -2.00763400 | -0.84092500 |
| H  | 1.90860800  | -2.96436100 | -1.04303500 |
| H  | 2.74710200  | -1.50908300 | -1.48806400 |
| O  | -0.74874800 | -0.01692300 | -0.59685100 |
| Cu | -2.51551100 | -0.32646400 | -0.05539500 |

## Molecule: Cu-ASN-02

|    |             |             |             |
|----|-------------|-------------|-------------|
| N  | 2.47547600  | 1.44846100  | 0.42491800  |
| H  | 2.94896800  | 1.50269700  | -0.48106800 |
| H  | 3.12145000  | 1.00266000  | 1.07990300  |
| H  | 2.27706700  | 2.39788600  | 0.74934300  |
| C  | 1.21557100  | 0.65468300  | 0.31596600  |
| H  | 0.78486900  | 0.62471000  | 1.31576300  |
| C  | 0.25032800  | 1.34397600  | -0.67113900 |
| C  | 1.59369700  | -0.77854500 | -0.07628700 |
| H  | 0.61306300  | 2.34310700  | -0.90261700 |
| H  | 0.20129100  | 0.78825300  | -1.60854400 |
| C  | -1.15343600 | 1.43671100  | -0.13526600 |
| O  | 2.77621600  | -1.05893000 | -0.26113600 |
| O  | -1.81058200 | 0.41300500  | 0.19856300  |
| N  | -1.70023600 | 2.62872900  | -0.03150000 |
| H  | -2.64985800 | 2.72009700  | 0.30332500  |
| H  | -1.18317500 | 3.45863900  | -0.27907100 |
| O  | 0.63682300  | -1.62790400 | -0.18092700 |
| Cu | -1.23437800 | -1.41823100 | 0.08335800  |

## Molecule: Cu-ASN-04

|    |             |             |             |
|----|-------------|-------------|-------------|
| N  | -2.83164400 | 0.35018900  | -0.88046400 |
| H  | -3.37648000 | 0.56216800  | -0.03975800 |
| H  | -3.19418900 | -0.52425100 | -1.26862700 |
| H  | -2.97948700 | 1.09515700  | -1.56619100 |
| C  | -1.38398300 | 0.21930400  | -0.55262000 |
| H  | -0.88172100 | -0.04769700 | -1.48079500 |
| C  | -0.88868300 | 1.56027200  | -0.00506500 |
| C  | -1.20941100 | -0.91562800 | 0.46159700  |
| H  | -1.08833800 | 2.33633900  | -0.75081700 |
| H  | -1.42446000 | 1.81691500  | 0.90741700  |
| C  | 0.58371400  | 1.63122700  | 0.29583200  |
| O  | -2.19276000 | -1.41223100 | 0.99736000  |
| O  | 1.03832000  | 2.14269100  | 1.28877200  |
| N  | 1.44906200  | 1.05212500  | -0.67070700 |
| H  | 2.39739700  | 1.41621500  | -0.58813100 |
| H  | 1.10802400  | 1.11537000  | -1.62921000 |
| O  | 0.00368200  | -1.26838500 | 0.72648300  |
| Cu | 1.57633000  | -0.97427800 | -0.27672600 |

## Molecule: Cu-ASN-031

|    |             |             |             |
|----|-------------|-------------|-------------|
| N  | -3.44863500 | -0.69647900 | -0.39507900 |
| H  | -3.48023800 | -0.29959800 | -1.33726300 |
| H  | -4.18170500 | -0.23673900 | 0.14842500  |
| H  | -3.65323600 | -1.69703600 | -0.44646600 |
| C  | -2.11442500 | -0.43925500 | 0.22605200  |
| H  | -2.15456100 | -0.85021200 | 1.23233200  |
| C  | -1.05301500 | -1.16170700 | -0.61168400 |
| C  | -1.86891300 | 1.08168800  | 0.31185900  |
| H  | -1.28509800 | -2.22784100 | -0.64221600 |
| H  | -1.05428100 | -0.76985100 | -1.62741900 |
| C  | 0.32870800  | -0.99115700 | -0.04646800 |
| O  | -2.70606100 | 1.83059600  | -0.24091800 |
| O  | 1.14585900  | -0.28517300 | -0.70605900 |
| N  | 0.63633200  | -1.60812200 | 1.06990700  |
| H  | 1.55220600  | -1.49251800 | 1.48372600  |
| H  | -0.05678700 | -2.15359200 | 1.56178700  |
| O  | -0.83332300 | 1.41120300  | 0.93413500  |
| Cu | 2.80668600  | 0.38859200  | -0.14732800 |

|                     |             |             |             |                     |             |             |             |                     |             |             |             |                      |             |             |             |
|---------------------|-------------|-------------|-------------|---------------------|-------------|-------------|-------------|---------------------|-------------|-------------|-------------|----------------------|-------------|-------------|-------------|
| Molecule: Fe-ASN-01 |             |             |             | Molecule: Fe-ASN-02 |             |             |             | Molecule: Fe-ASN-04 |             |             |             | Molecule: Fe-ASN-031 |             |             |             |
| N                   | 0.72963300  | 2.61487100  | -0.03036200 | N                   | -2.41348500 | 1.51720700  | -0.44322300 | N                   | -2.91544500 | 0.42379100  | -0.64308800 | N                    | -3.34780400 | -0.68274400 | -0.51755400 |
| H                   | 0.46705300  | 2.74884000  | 0.95143500  | H                   | -2.88076500 | 1.59105700  | 0.46528400  | H                   | -3.36269000 | 0.53550700  | 0.27217700  | H                    | -3.24674500 | -0.69655400 | -1.53550200 |
| H                   | 0.00625300  | 3.04072900  | -0.61711600 | H                   | -3.07676600 | 1.09644100  | -1.09827900 | H                   | -3.31998700 | -0.40806500 | -1.08232700 | H                    | -3.94326900 | 0.12124000  | -0.27723600 |
| H                   | 1.61068900  | 3.10987800  | -0.19580800 | H                   | -2.18554100 | 2.46030900  | -0.76908600 | H                   | -3.14105700 | 1.23936700  | -1.21852300 | H                    | -3.78644400 | -1.55569600 | -0.22068100 |
| C                   | 0.90018700  | 1.16646300  | -0.34922600 | C                   | -1.17597800 | 0.68950600  | -0.33812900 | C                   | -1.44018000 | 0.27117100  | -0.49744700 | C                    | -2.03572700 | -0.45205600 | 0.15390400  |
| H                   | 1.16397700  | 1.09491100  | -1.40314500 | H                   | -0.76645700 | 0.61641000  | -1.34487300 | H                   | -1.04899800 | 0.08050700  | -1.49769300 | H                    | -2.14072500 | -0.83119400 | 1.16993700  |
| C                   | 2.01350400  | 0.58070600  | 0.52944900  | C                   | -0.17496800 | 1.39045800  | 0.60726200  | C                   | -0.86213300 | 1.55328500  | 0.10489600  | C                    | -0.92638200 | -1.18906000 | -0.59097600 |
| C                   | -0.41746800 | 0.46891100  | -0.16612100 | C                   | -1.59380200 | -0.71344200 | 0.09903800  | C                   | -1.18870300 | -0.96728600 | 0.34771100  | C                    | -1.79143600 | 1.07157000  | 0.25298200  |
| H                   | 2.91886400  | 1.15144200  | 0.31941800  | H                   | -0.47724800 | 2.42388200  | 0.76129200  | H                   | -1.16918400 | 2.39335400  | -0.52660000 | H                    | -1.13675500 | -2.26096400 | -0.60684300 |
| H                   | 1.74937900  | 0.70144500  | 1.57858700  | H                   | -0.16873700 | 0.90562500  | 1.58634400  | H                   | -0.85710600 | 1.71793300  | 1.09965200  | H                    | -0.85710600 | -0.82893100 | -1.61560400 |
| C                   | 2.25683500  | -0.89706200 | 0.26911300  | C                   | 1.23739100  | 1.35778300  | 0.09952200  | C                   | 0.63775100  | 1.66301600  | 0.22979400  | C                    | 0.40777900  | -1.00154300 | 0.06049200  |
| O                   | -1.37811700 | 0.98917600  | 0.47916700  | O                   | -2.76068500 | -0.97867500 | 0.30982700  | O                   | -2.07855200 | -1.68653800 | 0.73526500  | O                    | -2.79443100 | 1.80892200  | 0.13156300  |
| O                   | 1.81943800  | -1.75583900 | 1.03829500  | O                   | 1.76876400  | 0.28601500  | -0.33928600 | O                   | 1.17139400  | 2.23010900  | 1.14857000  | O                    | 1.35106500  | -0.48022000 | -0.64772300 |
| N                   | 2.96378400  | -1.18644400 | -0.82732800 | N                   | 1.94940300  | 2.45150300  | 0.12949500  | N                   | 1.43963000  | 1.07392000  | -0.79303100 | N                    | 0.63817000  | -1.44859700 | 1.25943000  |
| H                   | 3.14133500  | -2.15089600 | -1.06587300 | H                   | 2.92272200  | 2.42891600  | -0.14980300 | H                   | 2.37571900  | 1.47834300  | -0.81018900 | H                    | 1.54960900  | -1.33004600 | 1.68659000  |
| H                   | 3.31488900  | -0.46077100 | -1.43217700 | H                   | 1.55157200  | 3.31999600  | 0.45946800  | H                   | 1.01353600  | 1.06672700  | -1.72007100 | H                    | -0.10248000 | -1.87702100 | 1.80065300  |
| O                   | -0.63135600 | -0.67155100 | -0.67854700 | O                   | -0.63991600 | -1.60256100 | 0.21544700  | O                   | 0.07698200  | -1.17946600 | 0.64643800  | O                    | -0.60719700 | 1.40514000  | 0.48159400  |
| Fe                  | -2.58555500 | -0.60165300 | -0.02085000 | Fe                  | 1.21648700  | -1.56183300 | -0.07724300 | Fe                  | 1.69302800  | -1.10083100 | -0.22367300 | Fe                   | 2.88886300  | 0.45132100  | -0.17601300 |

  

|                     |             |             |             |                     |             |             |             |                     |             |             |             |                      |             |             |             |
|---------------------|-------------|-------------|-------------|---------------------|-------------|-------------|-------------|---------------------|-------------|-------------|-------------|----------------------|-------------|-------------|-------------|
| Molecule: Hg-ASN-01 |             |             |             | Molecule: Hg-ASN-02 |             |             |             | Molecule: Hg-ASN-04 |             |             |             | Molecule: Hg-ASN-031 |             |             |             |
| N                   | 2.88917100  | 2.37535600  | -0.14530500 | N                   | -3.34635600 | -0.54124200 | -0.69763700 | N                   | -3.33267800 | -0.49294600 | -1.12631900 | N                    | 4.59493900  | 0.60138700  | -0.36443200 |
| H                   | 2.74089800  | 2.65164100  | 0.82935000  | H                   | -3.87339400 | -0.88227200 | 0.11062100  | H                   | -3.99957400 | -0.56794100 | -0.35187100 | H                    | 4.65528100  | 0.08645700  | -1.24718800 |
| H                   | 2.40272000  | 3.05338500  | -0.73674400 | H                   | -3.43458100 | -1.24235700 | -1.43652200 | H                   | -3.30531200 | -1.40205400 | -1.59411500 | H                    | 5.31580000  | 0.22402900  | 0.25340800  |
| H                   | 3.89001700  | 2.41935500  | -0.35305400 | H                   | -3.76593500 | 0.33240200  | -1.02477100 | H                   | -3.66678200 | 0.20898300  | -1.79060600 | H                    | 4.79277200  | 1.59060200  | -0.53138700 |
| C                   | 2.36657100  | 0.99561600  | -0.38204000 | C                   | -1.91301500 | -0.34005300 | -0.33535600 | C                   | -1.98530500 | -0.13002400 | -0.59392000 | C                    | 3.24261500  | 0.40064800  | 0.23932400  |
| H                   | 2.49920300  | 0.78689200  | -1.44044900 | H                   | -1.39620100 | -0.07741800 | -1.25669500 | H                   | -1.28314100 | -0.21573700 | -1.41994000 | H                    | 3.28017500  | 0.81328800  | 1.24411000  |
| C                   | 3.15858200  | 0.01024200  | 0.48237600  | C                   | -1.78489400 | 0.79577900  | 0.70750400  | C                   | -2.06775300 | 1.30662800  | -0.06115100 | C                    | 2.21888700  | 1.15448100  | -0.61849400 |
| C                   | 0.87223400  | 0.98410600  | -0.05099700 | C                   | -1.34641200 | -1.68310600 | 0.16068500  | C                   | -1.63614100 | -1.14546400 | 0.50827100  | C                    | 2.93583400  | -1.11017100 | 0.31300300  |
| H                   | 4.21843300  | 0.13033200  | 0.24885900  | H                   | -2.77282400 | 1.11206600  | 1.03499900  | H                   | -2.51613000 | 1.93136600  | -0.84008300 | H                    | 2.48856800  | 2.21142400  | -0.65437900 |
| H                   | 3.00336400  | 0.24282400  | 1.53475100  | H                   | -1.25300100 | 0.43033200  | 1.58663800  | H                   | -2.71393000 | 1.33926000  | 0.81447500  | H                    | 2.21840000  | 0.75466200  | -1.63092100 |
| C                   | 2.76402500  | -1.43996500 | 0.26039900  | C                   | -0.99692300 | 1.98005300  | 0.19619300  | C                   | -0.76309000 | 1.96913300  | 0.31183600  | C                    | 0.82269900  | 1.03843100  | -0.06694200 |
| O                   | 0.36725600  | 1.89354600  | 0.59753200  | O                   | -2.13933700 | -2.59369400 | 0.41154200  | O                   | -2.56333700 | -1.73620200 | 1.06536100  | O                    | 3.68306000  | -1.87679200 | -0.33693200 |
| O                   | 2.17103800  | -2.08099800 | 1.13251600  | O                   | 0.20867700  | 1.89276300  | -0.14537300 | O                   | -0.60286000 | 2.53842600  | 1.37267700  | O                    | 0.00941200  | 0.31112700  | -0.70586500 |
| N                   | 3.12031200  | -1.97141700 | -0.91494400 | N                   | -1.62179700 | 3.14368000  | 0.13857200  | N                   | 0.26349100  | 1.90478600  | -0.62642800 | N                    | 0.51913200  | 1.71449000  | 1.01569900  |
| H                   | 2.86806100  | -2.92476800 | -1.12768000 | H                   | -1.12345800 | 3.96666800  | -0.17055200 | H                   | 0.99786700  | 2.59211900  | -0.49047800 | H                    | -0.40534600 | 1.64270300  | 1.42213700  |
| H                   | 3.59931200  | -1.42604100 | -1.61402600 | H                   | -2.59132200 | 3.22591400  | 0.40289800  | H                   | -0.00964300 | 1.77287300  | -1.59475200 | H                    | 1.21536400  | 2.27869600  | 1.48115500  |
| O                   | 0.28278900  | -0.06271400 | -0.51279600 | O                   | -0.07335700 | -1.80247300 | 0.28544400  | O                   | -0.40360800 | -1.32675300 | 0.82171500  | O                    | 1.94133000  | -1.41262500 | 1.01033300  |
| Hg                  | -1.81031900 | -0.11324800 | -0.01894600 | Hg                  | 1.34084200  | -0.11964000 | -0.05150300 | Hg                  | 1.31566400  | -0.29183900 | -0.09414500 | Hg                   | -1.99687700 | -0.13608800 | -0.04796800 |

|                     |             |             |             |                     |             |             |             |                      |             |             |             |                     |             |             |             |
|---------------------|-------------|-------------|-------------|---------------------|-------------|-------------|-------------|----------------------|-------------|-------------|-------------|---------------------|-------------|-------------|-------------|
| Molecule: Mn-ASN-11 |             |             |             | Molecule: Mn-ASN-21 |             |             |             | Molecule: Mn-ASN-031 |             |             |             | Molecule: Mn-ASN-43 |             |             |             |
| N                   | 1.80211300  | 2.39294500  | -0.06203800 | N                   | 3.06058900  | 0.03490900  | -0.00352000 | N                    | -3.43284300 | -0.56974000 | -0.19732900 | N                   | -2.59284600 | -0.01944300 | -1.19471500 |
| H                   | 1.52942300  | 2.65378200  | 0.88940500  | H                   | 3.16646700  | -0.37955600 | -0.93318800 | H                    | -3.55535200 | 0.03056700  | -1.01979700 | H                   | -3.26615300 | -0.01901300 | -0.42101200 |
| H                   | 1.38350300  | 3.07466200  | -0.69804900 | H                   | 3.51703100  | -0.59180800 | 0.66248000  | H                    | -4.10793500 | -0.26341700 | 0.50584700  | H                   | -2.71768000 | -0.89229700 | -1.71170600 |
| H                   | 2.81939800  | 2.45238600  | -0.14498000 | H                   | 3.53558700  | 0.94000500  | 0.01878900  | H                    | -3.63300600 | -1.54249700 | -0.43856900 | H                   | -2.79458400 | 0.76196900  | -1.82236800 |
| C                   | 1.31975800  | 1.01232300  | -0.37474700 | C                   | 1.60867500  | 0.17862500  | 0.32870300  | C                    | -2.03638000 | -0.39171000 | 0.30764700  | C                   | -1.21247100 | 0.06798000  | -0.62719100 |
| H                   | 1.54546700  | 0.83034400  | -1.42261500 | H                   | 1.55224600  | 0.53257500  | 1.35497100  | H                    | -2.00721500 | -0.77577600 | 1.32333500  | H                   | -0.51523000 | -0.18486900 | -1.42321400 |
| C                   | 2.05964600  | 0.02340600  | 0.53335700  | C                   | 1.00099600  | 1.21194900  | -0.63589400 | C                    | -1.09579100 | -1.19228500 | -0.60282300 | C                   | -0.99020800 | 1.50529800  | -0.14283300 |
| C                   | -0.19325100 | 0.95543700  | -0.15367100 | C                   | 0.95368400  | -1.20882300 | 0.22068500  | C                    | -1.70172100 | 1.11613200  | 0.30095100  | C                   | -1.11360800 | -0.95531500 | 0.51978100  |
| H                   | 3.13295700  | 0.14831400  | 0.37653600  | H                   | 1.66659600  | 2.07579800  | -0.67076900 | H                    | -1.38508000 | -2.24366800 | -0.56786500 | H                   | -1.16367000 | 2.18051700  | -0.98120000 |
| H                   | 1.82864500  | 0.24703800  | 1.57413400  | H                   | 0.93235500  | 0.78474600  | -1.63575500 | H                    | -1.18393700 | -0.83244200 | -1.62698100 | H                   | -1.70556100 | 1.73189900  | 0.64736600  |
| C                   | 1.68539400  | -1.42474800 | 0.27514000  | C                   | -0.37604100 | 1.67627900  | -0.22466600 | C                    | 0.34441800  | -1.05115200 | -0.18248400 | C                   | 0.40045600  | 1.71985800  | 0.41722900  |
| O                   | -0.74070000 | 1.84714100  | 0.51189700  | O                   | 1.54437700  | -2.08608400 | -0.41924800 | O                    | -2.36309400 | 1.83172100  | -0.48897500 | O                   | -2.15373100 | -1.21096100 | 1.14635600  |
| O                   | 0.99982600  | -2.06386400 | 1.07900900  | O                   | -1.40954600 | 1.11150600  | -0.64870500 | O                    | 1.09010700  | -0.24601600 | -0.78006700 | O                   | 0.65234900  | 1.51857800  | 1.60843000  |
| N                   | 2.16344800  | -1.96016500 | -0.85452100 | N                   | -0.44193800 | 2.71742500  | 0.58926700  | N                    | 0.76095900  | -1.80809400 | 0.82155700  | N                   | 1.32635300  | 2.13963600  | -0.45708300 |
| H                   | 1.93697600  | -2.91483400 | -1.08914600 | H                   | -1.34236700 | 3.04837800  | 0.90628100  | H                    | 1.71090200  | -1.72373700 | 1.15570400  | H                   | 2.27600300  | 2.28292500  | -0.14711400 |
| H                   | 2.73234600  | -1.42322700 | -1.48967900 | H                   | 0.39218500  | 3.18825400  | 0.90553300  | H                    | 0.13346700  | -2.44706300 | 1.28499100  | H                   | 1.09545100  | 2.30900000  | -1.42288400 |
| O                   | -0.75583600 | -0.06339800 | -0.66567700 | O                   | -0.16650600 | -1.33098600 | 0.81695900  | O                    | -0.77755300 | 1.46872900  | 1.06683000  | O                   | 0.03175600  | -1.44625600 | 0.75548000  |
| Mn                  | -2.79693000 | -0.37021800 | -0.02648000 | Mn                  | -2.02484600 | -0.86273600 | -0.03334400 | Mn                   | 3.04290000  | 0.44486000  | -0.09233300 | Mn                  | 1.87635400  | -1.11717200 | -0.40957300 |

  

|                     |             |             |             |                     |             |             |             |                      |             |             |             |
|---------------------|-------------|-------------|-------------|---------------------|-------------|-------------|-------------|----------------------|-------------|-------------|-------------|
| Molecule: Ni-ASN-01 |             |             |             | Molecule: Ni-ASN-02 |             |             |             | Molecule: Ni-ASN-041 |             |             |             |
| N                   | -0.88832500 | 2.63208700  | 0.02210100  | N                   | -2.27957700 | 1.66900800  | -0.46048900 | N                    | -2.83936500 | 0.42684600  | -0.83144600 |
| H                   | -0.56947000 | 2.75499800  | -0.94385400 | H                   | -2.73751700 | 1.81895100  | 0.44238600  | H                    | -3.35852700 | 0.57354000  | 0.03923000  |
| H                   | -0.22764500 | 3.11323600  | 0.63844700  | H                   | -2.97755700 | 1.27369700  | -1.09482300 | H                    | -3.22957100 | -0.40234800 | -1.28672800 |
| H                   | -1.80420600 | 3.07921000  | 0.11783600  | H                   | -1.97320700 | 2.57286900  | -0.82885600 | H                    | -2.98617400 | 1.23341100  | -1.44419000 |
| C                   | -0.98549400 | 1.18257500  | 0.36775200  | C                   | -1.12016100 | 0.74102700  | -0.32109500 | C                    | -1.38630900 | 0.23807400  | -0.54732200 |
| H                   | -1.28199100 | 1.11660900  | 1.41193400  | H                   | -0.68927900 | 0.64222000  | -1.31681400 | H                    | -0.91798500 | -0.00077800 | -1.49952700 |
| C                   | -2.03040700 | 0.51966800  | -0.54141900 | C                   | -0.09263800 | 1.34272500  | 0.66195300  | C                    | -0.85255400 | 1.54729500  | 0.04082700  |
| C                   | 0.37477400  | 0.54987900  | 0.21149400  | C                   | -1.65451600 | -0.63394300 | 0.09555100  | C                    | -1.23388200 | -0.95177100 | 0.40646100  |
| H                   | -2.98390500 | 1.01925000  | -0.36512200 | H                   | -0.35864100 | 2.37458300  | 0.88158200  | H                    | -1.08268700 | 2.35461000  | -0.66264800 |
| H                   | -1.74157900 | 0.65623600  | -1.58231700 | H                   | -0.10256600 | 0.79674300  | 1.60709500  | H                    | -1.35137900 | 1.77035300  | 0.98288900  |
| C                   | -2.16856100 | -0.97196900 | -0.28597500 | C                   | 1.31346200  | 1.29018400  | 0.13684200  | C                    | 0.62833900  | 1.63442900  | 0.28179700  |
| O                   | 1.26299800  | 1.06399800  | -0.52793700 | O                   | -2.85490400 | -0.78557100 | 0.28916500  | O                    | -2.20187800 | -1.35884600 | 1.02957200  |
| O                   | -1.65147900 | -1.79581700 | -1.04441700 | O                   | 1.84759300  | 0.20275700  | -0.22652300 | O                    | 1.11654800  | 2.20573600  | 1.22153600  |
| N                   | -2.87983700 | -1.31601600 | 0.79249200  | N                   | 2.00138200  | 2.40529700  | 0.07103400  | N                    | 1.47387200  | 0.99303800  | -0.67825500 |
| H                   | -2.97928400 | -2.29060200 | 1.03439200  | H                   | 2.96199700  | 2.38806100  | -0.24604500 | H                    | 2.41802300  | 1.37866200  | -0.63392200 |
| H                   | -3.28378900 | -0.61811900 | 1.39679700  | H                   | 1.58644800  | 3.28550400  | 0.33805400  | H                    | 1.11413500  | 1.03752100  | -1.63295300 |
| O                   | 0.63040000  | -0.53849000 | 0.81223500  | O                   | -0.78628600 | -1.57948300 | 0.21328100  | O                    | -0.05105800 | -1.47653200 | 0.49587000  |
| Ni                  | 2.43470700  | -0.55577700 | 0.00569900  | Ni                  | 1.06819900  | -1.52908400 | -0.09654600 | Ni                   | 1.61107700  | -0.98768500 | -0.22716600 |



## Molecule: Zn-ASN-011

|    |             |             |             |
|----|-------------|-------------|-------------|
| N  | 1.10774500  | 2.61547400  | 0.02270200  |
| H  | 0.70139100  | 2.71685000  | 0.95711600  |
| H  | 0.53887300  | 3.16099700  | -0.62978400 |
| H  | 2.05271800  | 3.00800500  | 0.03152600  |
| C  | 1.14159000  | 1.17530300  | -0.37454100 |
| H  | 1.49402300  | 1.13101600  | -1.40102100 |
| C  | 2.09883300  | 0.43480100  | 0.57032200  |
| C  | -0.26241200 | 0.60361300  | -0.29336700 |
| H  | 3.09224700  | 0.86859800  | 0.45029800  |
| H  | 1.76929400  | 0.57744800  | 1.59868700  |
| C  | 2.14140600  | -1.05935000 | 0.30321200  |
| O  | -1.08590100 | 1.09645200  | 0.52662600  |
| O  | 1.47271500  | -1.84559900 | 0.98042500  |
| N  | 2.93754500  | -1.45311200 | -0.69617500 |
| H  | 2.98124700  | -2.43013900 | -0.94465300 |
| H  | 3.47199900  | -0.78689500 | -1.23088300 |
| O  | -0.55060500 | -0.38674400 | -1.01254600 |
| Zn | -2.46083300 | -0.47405000 | 0.02310800  |

## Molecule: Zn-ASN-021

|    |             |             |             |
|----|-------------|-------------|-------------|
| N  | 2.34801100  | 1.58451700  | 0.49215300  |
| H  | 2.85988000  | 1.67572000  | -0.38931300 |
| H  | 2.99542800  | 1.19236200  | 1.17879500  |
| H  | 2.05995600  | 2.51506200  | 0.80409900  |
| C  | 1.16356900  | 0.69143600  | 0.32213300  |
| H  | 0.70605200  | 0.60130900  | 1.30598500  |
| C  | 0.17664100  | 1.33422600  | -0.68011100 |
| C  | 1.66635600  | -0.70342300 | -0.09594800 |
| H  | 0.52440100  | 2.32812200  | -0.95341700 |
| H  | 0.13167800  | 0.74334500  | -1.59610700 |
| C  | -1.22957400 | 1.41512700  | -0.14045100 |
| O  | 2.87076300  | -0.84928300 | -0.31636400 |
| O  | -1.86181800 | 0.39479600  | 0.23645000  |
| N  | -1.79607700 | 2.60517600  | -0.08550800 |
| H  | -2.74827500 | 2.69281000  | 0.24187000  |
| H  | -1.29593600 | 3.43263000  | -0.37104700 |
| O  | 0.79881900  | -1.64157900 | -0.17951800 |
| Zn | -1.14069300 | -1.47216300 | 0.08581100  |

## Molecule: Zn-ASN-031

|    |             |             |             |
|----|-------------|-------------|-------------|
| N  | 3.52952400  | 0.70684300  | -0.31258500 |
| H  | 3.65283100  | 0.15474100  | -1.16628800 |
| H  | 4.25253700  | 0.40758800  | 0.34482400  |
| H  | 3.66617900  | 1.69871000  | -0.51955700 |
| C  | 2.17250500  | 0.43596100  | 0.25290000  |
| H  | 2.15973400  | 0.84648200  | 1.25916000  |
| C  | 1.13332900  | 1.13531000  | -0.63153900 |
| C  | 1.94207900  | -1.08890400 | 0.30617400  |
| H  | 1.36603100  | 2.20068900  | -0.67667500 |
| H  | 1.16578700  | 0.72336500  | -1.63864100 |
| C  | -0.26432800 | 0.96788700  | -0.09875300 |
| O  | 2.71257300  | -1.80422000 | -0.37559900 |
| O  | -1.06205900 | 0.21821800  | -0.71864500 |
| N  | -0.59308500 | 1.63967200  | 0.98634600  |
| H  | -1.51429800 | 1.53217700  | 1.38934500  |
| H  | 0.07812500  | 2.23255600  | 1.45138500  |
| O  | 0.97635100  | -1.45505300 | 1.01332800  |
| Zn | -2.87661500 | -0.35316700 | -0.11617400 |

|                     |             |             |             |                     |             |             |             |                     |             |             |             |                      |             |             |             |                      |             |             |             |
|---------------------|-------------|-------------|-------------|---------------------|-------------|-------------|-------------|---------------------|-------------|-------------|-------------|----------------------|-------------|-------------|-------------|----------------------|-------------|-------------|-------------|
| Molecule: Cd-GLN-03 |             |             |             | Molecule: Cd-GLN-04 |             |             |             | Molecule: Cd-GLN-05 |             |             |             | Molecule: Cd-GLN-011 |             |             |             | Molecule: Cd-GLN-022 |             |             |             |
| N                   | 0.16857200  | 3.09435300  | -0.96611400 | N                   | -2.47122700 | -2.03013000 | -0.73713700 | N                   | 3.87750800  | -1.91238400 | 0.30851100  | N                    | -0.80913200 | 3.07041200  | -0.13140300 | N                    | -0.86260600 | 1.89025300  | 1.63443600  |
| H                   | 0.40055300  | 3.67091200  | -0.15070500 | H                   | -2.99909000 | -1.66537300 | -1.53693700 | H                   | 4.17511200  | -1.58786900 | 1.23570500  | H                    | -0.56516100 | 3.00352300  | -1.12342000 | H                    | -1.42457700 | 1.03851200  | 1.69884200  |
| H                   | -0.72704500 | 3.42324000  | -1.33286400 | H                   | -3.06467100 | -2.71674800 | -0.26842700 | H                   | 4.71033200  | -2.22683800 | -0.19213900 | H                    | -0.09034600 | 3.63369400  | 0.32870300  | H                    | -1.49883800 | 2.68042100  | 1.50613100  |
| H                   | 0.88238700  | 3.22037800  | -1.68649500 | H                   | -1.62388400 | -2.49887700 | -1.06290700 | H                   | 3.23723000  | -2.70263400 | 0.40476900  | H                    | -1.70706800 | 3.55187100  | -0.04383800 | H                    | -0.37534500 | 2.01502600  | 2.52546600  |
| C                   | 0.08460000  | 1.66373400  | -0.53519300 | C                   | -2.16230700 | -0.88265900 | 0.17523200  | C                   | 3.23904100  | -0.75493000 | -0.39694400 | C                    | -0.88786400 | 1.70194600  | 0.46911600  | C                    | 0.13034200  | 1.81040500  | 0.51190200  |
| H                   | -0.41145100 | 1.11138600  | -1.33018000 | H                   | -1.86574200 | -1.30201400 | 1.13317300  | H                   | 3.23884300  | -0.98146300 | -1.45955200 | H                    | -1.03982300 | 1.82796200  | 1.53812700  | H                    | 0.63742200  | 2.77104500  | 0.49286600  |
| C                   | 1.50522300  | 1.14132800  | -0.31664900 | C                   | -1.02295200 | -0.07436100 | -0.44211200 | C                   | 1.81295600  | -0.60287500 | 0.12747300  | C                    | -2.06565300 | 0.95853800  | -0.16321000 | C                    | 1.12837600  | 0.69824100  | 0.80668900  |
| C                   | -0.75221400 | 1.62125400  | 0.75010500  | C                   | -3.45107200 | -0.04704700 | 0.33217100  | C                   | 4.09791900  | 0.49744200  | -0.11689900 | C                    | 0.43275700  | 0.98689100  | 0.21635900  | C                    | -0.59951500 | 1.65372000  | -0.83071400 |
| H                   | 2.07364000  | 1.32962100  | -1.22853100 | H                   | -0.20728900 | -0.76337100 | -0.67263100 | H                   | 1.28281800  | -1.54340800 | -0.03695800 | H                    | -2.95079900 | 1.58291700  | -0.03665300 | H                    | 1.68149900  | 0.97180800  | 1.70565400  |
| H                   | 1.97243200  | 1.71269900  | 0.48931200  | H                   | -1.36242700 | 0.36152800  | -1.38444800 | H                   | 1.84743700  | -0.42100500 | 1.20410100  | H                    | -1.88393500 | 0.85308200  | -1.23554700 | H                    | 0.59745900  | -0.23152300 | 1.03222700  |
| C                   | 1.54382700  | -0.34489400 | 0.00298200  | C                   | -0.51792300 | 1.02749300  | 0.49302500  | C                   | 1.05690700  | 0.53496200  | -0.56705400 | C                    | -2.31549500 | -0.40472000 | 0.46662400  | C                    | 2.09566300  | 0.46985700  | -0.34751600 |
| O                   | -0.72631100 | 2.61314300  | 1.48879100  | O                   | -4.24909000 | -0.06900300 | -0.63814600 | O                   | 4.67973200  | 0.53109000  | 0.99666800  | O                    | 1.12079600  | 1.29988900  | -0.77746500 | O                    | -1.49898200 | 0.74585500  | -0.94659800 |
| H                   | 1.02673200  | -0.56236400 | 0.93652000  | H                   | -1.33101000 | 1.69689300  | 0.76401000  | H                   | 1.55950500  | 1.48484300  | -0.39508500 | H                    | -1.47344800 | -1.07595100 | 0.30754400  | H                    | 1.56583700  | 0.15831300  | -1.24779900 |
| H                   | 1.02768900  | -0.90451400 | -0.78693100 | H                   | -0.11798700 | 0.58474300  | 1.40715300  | H                   | 1.01180700  | 0.35449200  | -1.64070400 | H                    | -2.43835200 | -0.29574100 | 1.54864400  | H                    | 2.61814700  | 1.40081400  | -0.58754800 |
| C                   | 2.95252300  | -0.89489800 | 0.06352200  | C                   | 0.58871700  | 1.81153200  | -0.15280300 | C                   | -0.35095000 | 0.61328600  | -0.04880900 | C                    | -3.58581400 | -1.04581100 | -0.05082000 | C                    | 3.15550900  | -0.55091000 | 0.00364700  |
| O                   | 3.85192600  | -0.48826700 | -0.68136100 | O                   | 1.73897000  | 1.33280200  | -0.34171000 | O                   | -1.22347600 | -0.16149400 | -0.52233900 | O                    | -4.59543900 | -0.38369400 | -0.32052100 | O                    | 3.68424400  | -0.58722300 | 1.12156500  |
| N                   | 3.15007000  | -1.87429500 | 0.95601800  | N                   | 0.32802400  | 3.04588300  | -0.54486200 | N                   | -0.59958600 | 1.48796300  | 0.90931700  | N                    | -3.55485600 | -2.38019000 | -0.16923400 | N                    | 3.49958500  | -1.39578200 | -0.97709700 |
| H                   | 4.05132300  | -2.32368800 | 1.01505100  | H                   | 1.04560900  | 3.59138700  | -1.00174800 | H                   | -1.52042100 | 1.54139000  | 1.32419500  | H                    | -4.38580700 | -2.76871000 | -0.45357000 | H                    | 4.24073000  | -2.06334100 | -0.82504600 |
| H                   | 2.40768700  | -2.18404600 | 1.56195100  | H                   | -0.58649600 | 3.44928800  | -0.41402200 | H                   | 0.13082300  | 2.08906700  | 1.25879600  | H                    | -2.72293300 | -2.90423300 | 0.04856100  | H                    | 3.06133300  | -1.34920200 | -1.88263900 |
| O                   | -1.40438800 | 0.55411400  | 1.01605100  | O                   | -3.56839800 | 0.59662000  | 1.39908800  | O                   | 4.10508200  | 1.37762000  | -1.00613800 | O                    | 0.73821600  | 0.05394200  | 1.02069500  | O                    | -0.27976900 | 2.41658500  | -1.74510700 |
| Cd                  | -1.70225000 | -1.19969000 | -0.24568500 | Cd                  | 2.39868300  | -0.70293400 | 0.12966300  | Cd                  | -3.38010200 | -0.18209700 | 0.00083200  | Cd                   | 2.54644600  | -0.68904100 | -0.07883700 | Cd                   | -1.67226500 | -1.16547500 | 0.05578200  |

  

|                     |             |             |             |                     |             |             |             |                      |             |             |             |                      |             |             |             |                      |             |             |             |
|---------------------|-------------|-------------|-------------|---------------------|-------------|-------------|-------------|----------------------|-------------|-------------|-------------|----------------------|-------------|-------------|-------------|----------------------|-------------|-------------|-------------|
| Molecule: Cu-GLN-01 |             |             |             | Molecule: Cu-GLN-05 |             |             |             | Molecule: Cu-GLN-022 |             |             |             | Molecule: Cu-GLN-031 |             |             |             | Molecule: Cu-GLN-041 |             |             |             |
| N                   | 0.23213700  | 2.80089700  | -0.00608000 | N                   | -3.06027900 | 1.97152300  | 0.07146200  | N                    | 1.43122300  | 1.14337800  | -1.79676700 | N                    | -1.23671100 | 2.63410800  | -0.79791100 | N                    | -2.31739300 | -1.77953900 | -0.88229600 |
| H                   | 0.39963700  | 2.77700400  | -1.01607500 | H                   | -3.38436300 | 1.79776500  | 1.02952500  | H                    | 1.83781500  | 0.20363800  | -1.78102700 | H                    | -1.20378300 | 3.20342600  | 0.05278100  | H                    | -2.86396100 | -1.28337200 | -1.59462700 |
| H                   | 1.07525400  | 3.16597800  | 0.44410000  | H                   | -3.87153800 | 2.25657500  | -0.47967200 | H                    | 2.19202900  | 1.82322600  | -1.72642300 | H                    | -2.20314100 | 2.62838600  | -1.13164500 | H                    | -2.94467600 | -2.43790900 | -0.41722300 |
| H                   | -0.53886000 | 3.44790600  | 0.17799800  | H                   | -2.37742000 | 2.73067700  | 0.06265300  | H                    | 0.97389800  | 1.26833400  | -2.70346800 | H                    | -0.64782100 | 3.06860300  | -1.51214300 | H                    | -1.56308000 | -2.30655600 | -1.32649300 |
| C                   | -0.11830300 | 1.44008600  | 0.50830100  | C                   | -2.48598100 | 0.68959100  | -0.45063100 | C                    | 0.42898500  | 1.33667900  | -0.69608900 | C                    | -0.75892500 | 1.24875800  | -0.49693300 | C                    | -1.79476300 | -0.76426600 | 0.08832800  |
| H                   | -0.25982300 | 1.53029600  | 1.58394400  | H                   | -2.46507600 | 0.76040500  | -1.53497600 | H                    | 0.07277300  | 2.35780400  | -0.79907800 | H                    | -0.93347700 | 0.64806600  | -1.38856200 | H                    | -1.50406300 | -1.29716800 | 0.98988700  |
| C                   | -1.40833900 | 0.96738900  | -0.16815400 | C                   | -1.07225000 | 0.53227200  | 0.10509600  | C                    | -0.72364600 | 0.35683600  | -0.87076100 | C                    | 0.73555900  | 1.31119600  | -0.17469200 | C                    | -0.58553800 | -0.08174200 | -0.54532800 |
| C                   | 1.04358200  | 0.51531400  | 0.24917700  | C                   | -3.42477400 | -0.45426300 | -0.00993100 | C                    | 1.11291400  | 1.24355200  | 0.67446200  | C                    | -1.59805900 | 0.71891900  | 0.66757500  | C                    | -2.93728400 | 0.22548900  | 0.40151000  |
| H                   | -2.12833400 | 1.78241400  | -0.08991900 | H                   | -0.49884100 | 1.42088100  | -0.16261000 | H                    | -1.14651200 | 0.51397500  | -1.86373700 | H                    | 1.22828100  | 1.79425500  | -1.01873400 | H                    | 0.14663500  | -0.85820000 | -0.78038800 |
| H                   | -1.21431900 | 0.79903900  | -1.22950200 | H                   | -1.11581000 | 0.47830100  | 1.19547900  | H                    | -0.36211000 | -0.67400100 | -0.83644100 | H                    | 0.88397500  | 1.94285700  | 0.70401600  | H                    | -0.88347600 | 0.38509800  | -1.48680900 |
| C                   | -1.99221500 | -0.28083600 | 0.47663000  | C                   | -0.37317600 | -0.70796700 | -0.44976600 | C                    | -1.79276900 | 0.57655100  | 0.18818400  | C                    | 1.35724400  | -0.05849800 | 0.05331200  | C                    | 0.04828600  | 0.96850300  | 0.37271900  |
| O                   | 1.93919700  | 0.80644300  | -0.59611600 | O                   | -4.06958800 | -0.26268400 | 1.05197200  | O                    | 1.75467500  | 0.16537900  | 0.99361200  | O                    | -2.03263800 | 1.50418400  | 1.50426700  | O                    | -3.78960300 | 0.39444900  | -0.50529700 |
| H                   | -1.32268500 | -1.13379700 | 0.37679600  | H                   | -0.87643500 | -1.61917800 | -0.13569700 | H                    | -1.39955900 | 0.39933400  | 1.19094400  | H                    | 0.98532900  | -0.51396300 | 0.97089200  | H                    | -0.61491800 | 1.81800100  | 0.51433500  |
| H                   | -2.13410100 | -0.11208400 | 1.54872500  | H                   | -0.38304700 | -0.68094800 | -1.54309200 | H                    | -2.12979200 | 1.61716900  | 0.16882000  | H                    | 1.08333800  | -0.72967200 | -0.77136700 | H                    | 0.25872300  | 0.52877400  | 1.35044500  |
| C                   | -3.35152600 | -0.63155200 | -0.09188400 | C                   | 1.06771300  | -0.77248000 | -0.04458800 | C                    | -3.01396200 | -0.29492600 | -0.01697400 | C                    | 2.87080900  | -0.02110600 | 0.07565200  | C                    | 1.35715000  | 1.43364800  | -0.18976100 |
| O                   | -4.11748600 | 0.22409000  | -0.55017100 | O                   | 1.78776700  | 0.25115400  | -0.24306300 | O                    | -3.23799500 | -0.88508700 | -1.08004800 | O                    | 3.52114500  | 0.74490900  | -0.64426100 | O                    | 2.36321400  | 0.66056500  | -0.28670400 |
| N                   | -3.68128800 | -1.92893300 | -0.03489300 | N                   | 1.53191500  | -1.88547200 | 0.47308700  | N                    | -3.84783800 | -0.36809000 | 1.03019000  | N                    | 3.45586300  | -0.90242500 | 0.89693900  | N                    | 1.47303700  | 2.67474300  | -0.59855100 |
| H                   | -4.59836700 | -2.22514600 | -0.33325200 | H                   | 2.50818100  | -1.96460700 | 0.72777700  | H                    | -4.71310200 | -0.87900500 | 0.94394400  | H                    | 4.46185100  | -0.97484600 | 0.91751700  | H                    | 2.34738900  | 3.00872100  | -0.98229300 |
| H                   | -3.04459600 | -2.61201200 | 0.34179800  | H                   | 0.92129400  | -2.67591900 | 0.61821900  | H                    | -3.65821100 | 0.13208000  | 1.88378800  | H                    | 2.90971400  | -1.51187000 | 1.48376200  | H                    | 0.69054000  | 3.30898800  | -0.53430100 |
| O                   | 1.12642700  | -0.59139700 | 0.86035300  | O                   | -3.43402000 | -1.47600200 | -0.73170500 | O                    | 1.02041100  | 2.19260700  | 1.44495100  | O                    | -1.80366300 | -0.55628200 | 0.73884700  | O                    | -2.89050000 | 0.78803500  | 1.51843700  |
| Cu                  | 2.80296400  | -1.00340800 | -0.17499100 | Cu                  | 3.64479800  | 0.45072500  | 0.03075300  | Cu                   | 1.82355900  | -1.49258400 | 0.14991900  | Cu                   | -1.21437400 | -1.87638300 | -0.43241400 | Cu                   | 2.44308200  | -1.12300000 | 0.27783100  |

| Molecule: Fe-GLN-01 |             |             |             | Molecule: Fe-GLN-023 |             |             |             | Molecule: Fe-GLN-031 |             |             |             | Molecule: Fe-GLN-041 |             |             |             | Molecule: Fe-GLN-052 |             |             |             |
|---------------------|-------------|-------------|-------------|----------------------|-------------|-------------|-------------|----------------------|-------------|-------------|-------------|----------------------|-------------|-------------|-------------|----------------------|-------------|-------------|-------------|
| N                   | 0.35655600  | 2.76880700  | 0.00415200  | N                    | 1.41504200  | -1.28720300 | 1.74430900  | N                    | -1.10504300 | 2.64980300  | -0.82278900 | N                    | -2.31288900 | -1.79189000 | -0.85598800 | N                    | 2.94595400  | -1.98071700 | 0.07961200  |
| H                   | 0.52787000  | 2.74705500  | -1.00602900 | H                    | 1.88295700  | -0.37666700 | 1.75367700  | H                    | -0.93987000 | 3.25063000  | -0.00985700 | H                    | -2.84949300 | -1.29293200 | -1.57403400 | H                    | 3.25589700  | -1.80466500 | 1.04215600  |
| H                   | 1.20282600  | 3.11843300  | 0.46213400  | H                    | 2.13281900  | -2.01337000 | 1.67564400  | H                    | -2.09643600 | 2.71438000  | -1.06750500 | H                    | -2.95753100 | -2.42227100 | -0.37560800 | H                    | 3.76591400  | -2.26576300 | -0.45871300 |
| H                   | -0.40339400 | 3.43053400  | 0.18507800  | H                    | 0.93110000  | -1.39900900 | 2.63965700  | H                    | -0.55369200 | 3.00698000  | -1.60740600 | H                    | -1.57761900 | -2.35013700 | -1.29396700 | H                    | 2.26433200  | -2.74082900 | 0.06151100  |
| C                   | -0.02972000 | 1.41777400  | 0.51455300  | C                    | 0.42728500  | -1.39788900 | 0.62186000  | C                    | -0.70953200 | 1.24164000  | -0.52198100 | C                    | -1.75859100 | -0.77781600 | 0.09608500  | C                    | 2.38116500  | -0.70057500 | -0.45475500 |
| H                   | -0.17878600 | 1.50747900  | 1.59056100  | H                    | 0.06458700  | -2.42177100 | 0.63716300  | H                    | -0.95175300 | 0.64702700  | -1.40241100 | H                    | -1.47382800 | -1.30474800 | 1.00292200  | H                    | 2.38155900  | -0.77149500 | -1.53924200 |
| C                   | -1.32069700 | 0.95777800  | -0.17450300 | C                    | -0.72508700 | -0.41883800 | 0.83028800  | C                    | 0.79410500  | 1.19733800  | -0.24476200 | C                    | -0.53863000 | -0.12768600 | -0.55175700 | C                    | 0.95689600  | -0.54112900 | 0.07449700  |
| C                   | 1.11163500  | 0.47543200  | 0.27502000  | C                    | 1.12433900  | -1.20021800 | -0.72202300 | C                    | -1.52957700 | 0.76934500  | 0.66789400  | C                    | -2.87782900 | 0.24214500  | 0.40761700  | C                    | 3.30856100  | 0.44597600  | 0.00481900  |
| H                   | -2.00807400 | 1.80354500  | -0.15168300 | H                    | -1.15102700 | -0.62090000 | 1.81520300  | H                    | 1.29008900  | 1.62569100  | -1.11625100 | H                    | 0.19286400  | -0.91480300 | -0.75307700 | H                    | 0.38712300  | -1.43370600 | -0.18872800 |
| H                   | -1.10749300 | 0.73379700  | -1.22124000 | H                    | -0.35854300 | 0.60903900  | 0.84132000  | H                    | 1.01363600  | 1.83402300  | 0.61523100  | H                    | -0.82061600 | 0.31096900  | -1.51101800 | H                    | 0.97998600  | -0.46554900 | 1.16395900  |
| C                   | -1.96668100 | -0.23265700 | 0.51785500  | C                    | -1.79701700 | -0.57355700 | -0.24328000 | C                    | 1.32796400  | -0.21249100 | -0.00413500 | C                    | 0.07285600  | 0.95367100  | 0.34770000  | C                    | 0.27147100  | 0.69205000  | -0.51770300 |
| O                   | 2.10976500  | 0.78896900  | -0.44706300 | O                    | 1.87059900  | -0.10581100 | -0.86482900 | O                    | -1.97169200 | 1.52747400  | 1.49951000  | O                    | -3.73474500 | 0.41577900  | -0.49271600 | O                    | 3.94293300  | 0.25069300  | 1.07174700  |
| H                   | -1.31214000 | -1.10325000 | 0.51615100  | H                    | -1.37231400 | -0.40164100 | -1.23664900 | H                    | 0.93641300  | -0.62831100 | 0.92228100  | H                    | -0.58843800 | 1.81322900  | 0.42699200  | H                    | 0.80141000  | 1.60551900  | -0.25847400 |
| H                   | -2.16538700 | 0.01213300  | 1.56581100  | H                    | -2.20379900 | -1.58474100 | -0.23456000 | H                    | 1.02817700  | -0.87017800 | -0.82635300 | H                    | 0.24547400  | 0.55459700  | 1.34926700  | H                    | 0.24095100  | 0.61357900  | -1.60807600 |
| C                   | -3.29721700 | -0.59640400 | -0.10889300 | C                    | -2.89889800 | 0.44944800  | -0.07665400 | C                    | 2.84273300  | -0.20575900 | 0.02807600  | C                    | 1.39568500  | 1.40202400  | -0.17027300 | C                    | -1.14290500 | 0.81232800  | -0.06436200 |
| O                   | -3.98770100 | 0.22945700  | -0.71683800 | O                    | -2.64706000 | 1.63980900  | 0.15084700  | O                    | 3.50502000  | 0.19353700  | -0.93681300 | O                    | 2.42081700  | 0.61594700  | -0.12132800 | O                    | -1.92083300 | -0.19422000 | -0.26013800 |
| N                   | -3.68736100 | -1.86601900 | 0.06629800  | N                    | -4.14923000 | -0.00508900 | -0.21653600 | N                    | 3.40924000  | -0.65559600 | 1.15381700  | N                    | 1.56544900  | 2.58715900  | -0.67160000 | N                    | -1.57259500 | 1.90468100  | 0.49289200  |
| H                   | -4.59301000 | -2.16130400 | -0.26607600 | H                    | -4.92388500 | 0.63937600  | -0.16544500 | H                    | 4.41487200  | -0.66525500 | 1.23819100  | H                    | 2.47341000  | 2.87539700  | -1.01950400 | H                    | -2.54027700 | 1.99486300  | 0.78151300  |
| H                   | -3.10972700 | -2.52446600 | 0.56343100  | H                    | -4.33216000 | -0.97825700 | -0.40065700 | H                    | 2.85061900  | -0.95366200 | 1.93677000  | H                    | 0.79056600  | 3.23721900  | -0.71502400 | H                    | -0.94125100 | 2.68165100  | 0.64132900  |
| O                   | 1.12819000  | -0.69839600 | 0.75929700  | O                    | 0.99075900  | -1.98455400 | -1.62948000 | O                    | -1.69987300 | -0.54338400 | 0.76231700  | O                    | -2.80524800 | 0.81699100  | 1.51627700  | O                    | 3.31761100  | 1.47261300  | -0.70985900 |
| Fe                  | 2.90296100  | -1.09905100 | -0.21687100 | Fe                   | 1.92198000  | 1.54018300  | -0.06666200 | Fe                   | -1.46704700 | -1.92623900 | -0.42886800 | Fe                   | 2.57652900  | -1.19296800 | 0.27546400  | Fe                   | -3.75299900 | -0.51407400 | 0.04947100  |

  

| Molecule: Hg-GLN-01 |             |             |             | Molecule: Hg-GLN-05 |             |             |             | Molecule: Hg-GLN-023 |             |             |             | Molecule: Hg-GLN-031 |             |             |             | Molecule: Hg-GLN-041 |             |             |             |
|---------------------|-------------|-------------|-------------|---------------------|-------------|-------------|-------------|----------------------|-------------|-------------|-------------|----------------------|-------------|-------------|-------------|----------------------|-------------|-------------|-------------|
| N                   | -1.35012800 | 3.00314900  | -0.10254000 | N                   | 4.32804400  | -2.01212400 | -0.05773600 | N                    | -0.36313100 | 2.15391500  | 1.65578700  | N                    | 1.10583400  | 3.04051100  | -1.10840400 | N                    | -2.81810300 | -2.00394500 | -0.84640300 |
| H                   | -1.12434900 | 2.93967400  | -1.09886000 | H                   | 4.53150800  | -1.96734600 | 0.94653600  | H                    | -1.06116600 | 1.40473500  | 1.64479400  | H                    | 1.54558800  | 3.58070600  | -0.35635200 | H                    | -3.47567900 | -1.65323700 | -1.55186400 |
| H                   | -0.59730300 | 3.52282600  | 0.35440200  | H                   | 5.20228200  | -2.23861200 | -0.53499800 | H                    | -0.85495000 | 3.04512400  | 1.55469300  | H                    | 0.27474000  | 3.55026500  | -1.41550700 | H                    | -3.27003500 | -2.78432300 | -0.36635900 |
| H                   | -2.22130200 | 3.52895600  | 0.00056300  | H                   | 3.65115300  | -2.75396200 | -0.24616600 | H                    | 0.09625100  | 2.14558200  | 2.57043300  | H                    | 1.75403400  | 2.97286400  | -1.89650400 | H                    | -1.96836100 | -2.34783200 | -1.29795900 |
| C                   | -1.50413800 | 1.63795900  | 0.49124000  | C                   | 3.82473200  | -0.66884700 | -0.48894800 | C                    | 0.65100100  | 1.97692500  | 0.56510600  | C                    | 0.74855700  | 1.68114700  | -0.59791100 | C                    | -2.53523400 | -0.88381000 | 0.10816900  |
| H                   | -1.72991700 | 1.77733400  | 1.54659700  | H                   | 3.91083300  | -0.62609700 | -1.57173500 | H                    | 1.26244400  | 2.87515000  | 0.57453300  | H                    | 0.09045300  | 1.22497800  | -1.33501200 | H                    | -2.14964900 | -1.32581200 | 1.02300000  |
| C                   | -2.65428900 | 0.91663200  | -0.21437500 | C                   | 2.36563000  | -0.52977000 | -0.05631700 | C                    | 1.51409600  | 0.75829900  | 0.85952100  | C                    | 2.03807500  | 0.87537300  | -0.44215100 | C                    | -1.49696300 | 0.03641700  | -0.52795800 |
| C                   | -0.18617600 | 0.88398500  | 0.37443700  | C                   | 4.72417800  | 0.40349200  | 0.16180900  | C                    | -0.05508800 | 1.94383000  | -0.79770600 | C                    | 0.01308600  | 1.86830400  | 0.73109600  | C                    | -3.86730300 | -0.15472700 | 0.38894000  |
| H                   | -3.49324700 | 1.61196000  | -0.26094000 | H                   | 1.81940500  | -1.41476900 | -0.38547300 | H                    | 2.02663700  | 0.92673800  | 1.80687900  | H                    | 2.51574500  | 0.83436900  | -1.42203800 | H                    | -0.64429900 | -0.57957700 | -0.82471900 |
| H                   | -2.36048500 | 0.68885800  | -1.24142400 | H                   | 2.31415400  | -0.49281300 | 1.03448500  | H                    | 0.87887300  | -0.12196600 | 1.00003700  | H                    | 2.70664200  | 1.41358700  | 0.23458600  | H                    | -1.91399000 | 0.48294400  | -1.43313600 |
| C                   | -3.09231200 | -0.34748000 | 0.51165200  | C                   | 1.71548000  | 0.71655600  | -0.65577500 | C                    | 2.52195900  | 0.47773500  | -0.24733100 | C                    | 1.82056200  | -0.54521500 | 0.07620000  | C                    | -1.03553700 | 1.13476300  | 0.43367800  |
| O                   | 0.70030800  | 1.34756100  | -0.40606600 | O                   | 5.27428200  | 0.08468400  | 1.24569800  | O                    | -1.00281000 | 1.08716600  | -1.02493500 | O                    | 0.30657800  | 2.83022600  | 1.43839400  | O                    | -4.72593500 | -0.19514900 | -0.52766200 |
| H                   | -2.28631600 | -1.07692400 | 0.55547200  | H                   | 2.25685700  | 1.61626500  | -0.37324900 | H                    | 2.03351600  | 0.42393900  | -1.22042600 | H                    | 1.41448000  | -0.53333700 | 1.08589900  | H                    | -1.86899700 | 1.77677500  | 0.70744900  |
| H                   | -3.35880100 | -0.10557200 | 1.54542300  | H                   | 1.72414500  | 0.64971300  | -1.74678700 | H                    | 3.25775100  | 1.28529200  | -0.30026800 | H                    | 1.11241800  | -1.07133300 | -0.57058300 | H                    | -0.63014900 | 0.68528900  | 1.34260900  |
| C                   | -4.31654700 | -0.97691100 | -0.11714800 | C                   | 0.27865700  | 0.85647600  | -0.24300900 | C                    | 3.27952200  | -0.80692600 | 0.00886700  | C                    | 3.11585500  | -1.32698900 | 0.03424900  | C                    | 0.05292000  | 1.96651400  | -0.17133800 |
| O                   | -5.19237100 | -0.30702700 | -0.67783600 | O                   | -0.48927000 | -0.13381200 | -0.43647800 | O                    | 3.61334500  | -1.15297300 | 1.14858400  | O                    | 3.70701600  | -1.53480200 | -1.03284300 | O                    | 1.23836500  | 1.54585100  | -0.34157400 |
| N                   | -4.40350100 | -2.30892400 | 0.00238500  | N                   | -0.11021700 | 1.99830400  | 0.27777000  | N                    | 3.57469500  | -1.53642000 | -1.07513400 | N                    | 3.57626000  | -1.77361800 | 1.20895500  | N                    | -0.23060800 | 3.19473600  | -0.54818200 |
| H                   | -5.21864300 | -2.79088100 | -0.34516300 | H                   | -1.07928600 | 2.13696200  | 0.53967000  | H                    | 4.11255100  | -2.38421000 | -0.97472900 | H                    | 4.43927800  | -2.29592000 | 1.24276100  | H                    | 0.48308000  | 3.77502700  | -0.96794800 |
| H                   | -3.67578100 | -2.83967500 | 0.45273200  | H                   | 0.54757600  | 2.75182900  | 0.41042500  | H                    | 3.29172700  | -1.24270500 | -1.99606000 | H                    | 3.08456200  | -1.58557100 | 2.06717700  | H                    | -1.15976100 | 3.56859300  | -0.42793800 |
| O                   | -0.04731800 | -0.16924900 | 1.02761200  | O                   | 4.79430100  | 1.50408800  | -0.43022200 | O                    | 0.29200400  | 2.75447900  | -1.65046300 | O                    | -0.86847800 | 0.99598200  | 1.09848300  | O                    | -3.95461800 | 0.43306300  | 1.48978500  |
| Hg                  | 2.16471700  | -0.39714400 | -0.08290300 | Hg                  | -2.60612500 | -0.17339500 | 0.06310600  | Hg                   | -1.35267300 | -0.75360900 | 0.01449100  | Hg                   | -1.54112900 | -0.63257300 | -0.11474300 | Hg                   | 1.88461300  | -0.45998100 | 0.09007000  |

|                     |             |             |             |                      |             |             |             |                      |             |             |             |                     |             |             |             |                     |             |             |             |
|---------------------|-------------|-------------|-------------|----------------------|-------------|-------------|-------------|----------------------|-------------|-------------|-------------|---------------------|-------------|-------------|-------------|---------------------|-------------|-------------|-------------|
| Molecule: Mn-GLN-11 |             |             |             | Molecule: Mn-GLN-023 |             |             |             | Molecule: Mn-GLN-031 |             |             |             | Molecule: Mn-GLN-43 |             |             |             | Molecule: Mn-GLN-51 |             |             |             |
| N                   | 0.13114800  | 2.81677700  | -0.16719700 | N                    | 1.48117000  | -1.39177300 | 1.60706800  | N                    | -1.36262800 | 2.47676800  | -0.94724200 | N                   | -2.15147300 | -1.20287500 | -1.30510600 | N                   | -3.05981600 | -1.92768700 | -0.20459200 |
| H                   | 0.33813800  | 2.72204100  | -1.16494500 | H                    | 1.96567700  | -0.48993300 | 1.58832200  | H                    | -1.37910400 | 3.09647100  | -0.13110600 | H                   | -2.84608800 | -0.58184800 | -1.73456200 | H                   | -3.49955300 | -1.62506700 | -1.08079900 |
| H                   | 0.94123700  | 3.25625600  | 0.27526300  | H                    | 2.18833500  | -2.12580300 | 1.53163800  | H                    | -2.31804800 | 2.41211500  | -1.30382900 | H                   | -2.65303000 | -2.00363900 | -0.91727300 | H                   | -3.80140000 | -2.26506200 | 0.41121500  |
| H                   | -0.67668600 | 3.43308000  | -0.05285200 | H                    | 1.00421800  | -1.49356000 | 2.50562900  | H                    | -0.77072500 | 2.88525200  | -1.67332100 | H                   | -1.49756800 | -1.53899300 | -2.01409600 | H                   | -2.41136600 | -2.69639100 | -0.38538600 |
| C                   | -0.14595900 | 1.47233500  | 0.43250700  | C                    | 0.50647800  | -1.46897400 | 0.47015300  | C                    | -0.85296200 | 1.13374400  | -0.52562000 | C                   | -1.46188900 | -0.43025800 | -0.22406100 | C                   | -2.36969300 | -0.73712200 | 0.38976200  |
| H                   | -0.28048500 | 1.62449600  | 1.50107800  | H                    | 0.16469100  | -2.49895900 | 0.41870400  | H                    | -1.04444700 | 0.44252400  | -1.34432900 | H                   | -0.96987600 | -1.14763200 | 0.42986900  | C                   | -2.20335500 | -0.95006900 | 1.44252400  |
| C                   | -1.42277500 | 0.91717300  | -0.19458600 | C                    | -0.66471800 | -0.53525300 | 0.76270400  | C                    | 0.64665600  | 1.24929600  | -0.26190400 | C                   | -0.43029200 | 0.49039500  | -0.86825300 | C                   | -1.04106500 | -0.54295800 | -0.33696000 |
| C                   | 1.06565700  | 0.57785200  | 0.20271500  | C                    | 1.24075300  | -1.12509700 | -0.83436200 | C                    | -1.64153500 | 0.70870700  | 0.72331100  | C                   | -2.53746000 | 0.35328600  | 0.55640000  | C                   | -3.31134900 | 0.47533700  | 0.23953300  |
| H                   | -2.19919400 | 1.67571500  | -0.08596000 | H                    | -1.13166300 | -0.86721200 | 1.69049600  | H                    | 1.10852300  | 1.67840300  | -1.15191600 | H                   | 0.25426400  | -0.13748900 | -1.44268800 | H                   | -0.44442700 | -1.44521600 | -0.19591300 |
| H                   | -1.25774500 | 0.76192500  | -1.26377600 | H                    | -0.29925300 | 0.48139000  | 0.93147600  | H                    | 0.81225300  | 1.94275300  | 0.56610900  | H                   | -0.92901800 | 1.16184100  | -1.56846300 | H                   | -1.23034500 | -0.43213400 | -1.40751000 |
| C                   | -1.89725000 | -0.37716700 | 0.45860800  | C                    | -1.69753800 | -0.53013800 | -0.35605500 | C                    | 1.30185400  | -0.09284000 | 0.03841600  | C                   | 0.36136000  | 1.30306700  | 0.16991600  | C                   | -0.26561500 | 0.66509300  | 0.17890300  |
| O                   | 1.83803800  | 0.83640200  | -0.75618200 | O                    | 2.12370800  | -0.20391200 | -0.77053800 | O                    | -2.02688300 | 1.60450200  | 1.49158700  | O                   | -3.55577700 | 0.69413700  | -0.09593100 | O                   | -4.08199600 | 0.46205200  | -0.75334600 |
| H                   | -1.19510400 | -1.18919100 | 0.28032100  | H                    | -1.27926600 | -0.11812800 | -1.27394200 | H                    | 0.93548200  | -0.51438200 | 0.97303000  | H                   | -0.02086500 | 2.31729500  | 0.25603600  | H                   | -0.75443800 | 1.59689400  | -0.09831400 |
| H                   | -1.96973100 | -0.23788600 | 1.54113400  | H                    | -2.00976500 | -1.55500700 | -0.57888700 | H                    | 1.05587600  | -0.80091600 | -0.76194400 | H                   | 0.27137700  | 0.83825400  | 1.15399700  | H                   | -0.21979400 | 0.63537100  | 1.27230100  |
| C                   | -3.28120900 | -0.75733000 | -0.02145600 | C                    | -2.94928300 | 0.22876300  | 0.02929400  | C                    | 2.81192100  | 0.00456100  | 0.06056000  | C                   | 1.83148400  | 1.29996900  | -0.14033100 | C                   | 1.16550700  | 0.67548400  | -0.28125400 |
| O                   | -4.20216500 | 0.06817200  | -0.06946800 | O                    | -3.41783900 | 0.18527400  | 1.17370700  | O                    | 3.43601300  | 0.63723900  | -0.80015000 | O                   | 2.46343000  | 0.22240900  | -0.24515300 | O                   | 1.84158600  | -0.38098400 | -0.27171100 |
| N                   | -3.45584900 | -2.03876100 | -0.36920700 | N                    | -3.53403000 | 0.92660700  | -0.95347000 | N                    | 3.42854200  | -0.66068300 | 1.04556100  | N                   | 2.44341900  | 2.46520300  | -0.28897900 | N                   | 1.68276500  | 1.83693400  | -0.65326800 |
| H                   | -4.36973800 | -2.35536900 | -0.65704800 | H                    | -4.40474500 | 1.40462600  | -0.77665100 | H                    | 4.43644800  | -0.66437700 | 1.09095000  | H                   | 3.43650900  | 2.49482200  | -0.47099900 | H                   | 2.65579200  | 1.89256100  | -0.92032900 |
| H                   | -2.69874200 | -2.70111400 | -0.32754900 | H                    | -3.14312000 | 0.94851300  | -1.88114200 | H                    | 2.90459200  | -1.15491000 | 1.74915900  | H                   | 1.93295900  | 3.33053300  | -0.21006500 | H                   | 1.12422400  | 2.67636400  | -0.65948200 |
| O                   | 1.22408300  | -0.39556900 | 0.98605100  | O                    | 0.93036900  | -1.75196300 | -1.85319400 | O                    | -1.82344000 | -0.53657700 | 0.89812900  | O                   | -2.28306100 | 0.60404900  | 1.75608300  | O                   | -3.20385000 | 1.37282200  | 1.10582900  |
| Mn                  | 3.19402100  | -1.10021200 | -0.11363100 | Mn                   | 1.82443400  | 1.77277000  | 0.09755900  | Mn                   | -1.21933500 | -2.14790600 | -0.46504500 | Mn                  | 1.65607000  | -1.75331800 | 0.37579300  | Mn                  | 3.95645600  | -0.46392400 | 0.23362500  |

  

|                     |             |             |             |                      |             |             |             |                      |             |             |             |                      |             |             |             |                      |             |             |             |
|---------------------|-------------|-------------|-------------|----------------------|-------------|-------------|-------------|----------------------|-------------|-------------|-------------|----------------------|-------------|-------------|-------------|----------------------|-------------|-------------|-------------|
| Molecule: Ni-GLN-13 |             |             |             | Molecule: Ni-GLN-023 |             |             |             | Molecule: Ni-GLN-033 |             |             |             | Molecule: Ni-GLN-043 |             |             |             | Molecule: Ni-GLN-053 |             |             |             |
| N                   | 0.26339900  | 2.78789300  | -0.18647800 | N                    | 1.35058300  | 1.73123000  | -1.46223100 | N                    | -0.98286600 | 2.71830900  | -0.79810700 | N                    | -2.32677400 | -1.96517900 | -0.58105100 | N                    | -3.06089700 | 1.94959900  | 0.28636000  |
| H                   | 0.43659600  | 2.68693600  | -1.19103000 | H                    | 1.74303700  | 0.83142500  | -1.75451500 | H                    | -0.85319100 | 3.29656800  | 0.03698400  | H                    | -2.77412600 | -1.60692700 | -1.43103600 | H                    | -3.37945900 | 1.65566600  | 1.21631700  |
| H                   | 1.10252400  | 3.18840000  | 0.24186000  | H                    | 2.12718200  | 2.35625500  | -1.23141200 | H                    | -1.96142900 | 2.79646700  | -1.08477800 | H                    | -3.02990800 | -2.50862800 | -0.07706000 | H                    | -3.87753900 | 2.28170000  | -0.22955800 |
| H                   | -0.50766900 | 3.44897800  | -0.05932300 | H                    | 0.84530100  | 2.12988000  | -2.25812700 | H                    | -0.39315900 | 3.08617700  | -1.54842200 | H                    | -1.55031700 | -2.58167700 | -0.82778400 | H                    | -2.39556000 | 2.71981600  | 0.37396500  |
| C                   | -0.09155200 | 1.47105800  | 0.43039900  | C                    | 0.41690100  | 1.56640800  | -0.30077000 | C                    | -0.61742700 | 1.29947700  | -0.50005500 | C                    | -1.87715300 | -0.79457100 | 0.23808700  | C                    | -2.45446300 | 0.75851700  | -0.39027200 |
| H                   | -0.21186800 | 1.63565100  | 1.49891500  | H                    | 0.08099500  | 2.56360000  | -0.03001700 | H                    | -0.85885400 | 0.71865100  | -1.38910800 | H                    | -1.66367700 | -1.16381500 | 1.23805200  | H                    | -2.41011600 | 0.97687800  | -1.45377300 |
| C                   | -1.39528700 | 0.96436600  | -0.18872500 | C                    | -0.76706700 | 0.70548300  | -0.73288300 | C                    | 0.88029600  | 1.23541100  | -0.20369800 | C                    | -0.61980100 | -0.21094100 | -0.40310100 | C                    | -1.05257300 | 0.54865300  | 0.17814900  |
| C                   | 1.05201300  | 0.51410200  | 0.21861400  | C                    | 1.16648700  | 1.00252600  | 0.90605400  | C                    | -1.46817600 | 0.84233200  | 0.68193300  | C                    | -3.03394900 | 0.22606000  | 0.28119400  | C                    | -3.37628000 | -0.45275800 | -0.13208000 |
| H                   | -2.14532800 | 1.73837800  | -0.02433100 | H                    | -1.26943200 | 1.22743100  | -1.54769400 | H                    | 1.39913500  | 1.66203400  | -1.06242900 | H                    | 0.08726200  | -1.02733200 | -0.57245000 | H                    | -0.47050100 | 1.45485100  | 0.00213500  |
| H                   | -1.25762900 | 0.85144300  | -1.26631700 | H                    | -0.40680200 | -0.24548600 | -1.13658400 | H                    | 1.09622700  | 1.86323400  | 0.66389700  | H                    | -0.87135700 | 0.21625700  | -1.37633000 | H                    | -1.12214900 | 0.39651400  | 1.25778000  |
| C                   | -1.87802000 | -0.34648800 | 0.42256100  | C                    | -1.74317900 | 0.45902400  | 0.40692700  | C                    | 1.38465000  | -0.18097600 | 0.03459600  | C                    | 0.02816000  | 0.85710600  | 0.48800100  | C                    | -0.34414400 | -0.64707600 | -0.46614100 |
| O                   | 1.81346900  | 0.61080600  | -0.79188200 | O                    | 1.97394500  | -0.01655300 | 0.69858100  | O                    | -1.81242600 | 1.64396000  | 1.53496000  | O                    | -3.85463200 | 0.18051800  | -0.66896700 | O                    | -4.00258200 | -0.45041700 | 0.95700300  |
| H                   | -1.21041100 | -1.16946200 | 0.17057700  | H                    | -1.27461100 | -0.10257900 | 1.21616800  | H                    | 0.98432600  | 0.59482800  | 0.95920000  | H                    | -0.66851000 | 1.66821500  | 0.68170400  | H                    | -0.86791900 | -1.57441700 | 0.24623500  |
| H                   | -1.89897800 | -0.26222300 | 1.51283200  | H                    | -2.06791300 | 1.41270400  | 0.83415300  | H                    | 1.05623200  | -0.83331400 | -0.78311500 | H                    | 0.31965400  | 0.41370500  | 1.44251100  | H                    | -0.30744700 | -0.51923700 | -1.54933800 |
| C                   | -3.29430700 | -0.65926100 | -0.01404100 | C                    | -2.99080200 | -0.26986700 | -0.04605200 | C                    | 2.89816400  | -0.24871600 | 0.04175000  | C                    | 1.26186400  | 1.41166600  | -0.14419500 | C                    | 1.06869400  | -0.74929000 | 0.01511800  |
| O                   | -4.17809200 | 0.20635100  | -0.01624400 | O                    | -3.39975500 | -0.22137900 | -1.21174400 | O                    | 3.58259000  | 0.38982600  | -0.76630400 | O                    | 2.34933400  | 0.74309200  | -0.24933400 | O                    | 1.87611500  | 0.16575500  | -0.34226100 |
| N                   | -3.53610200 | -1.92631900 | -0.37137500 | N                    | -3.63658100 | -0.95009600 | 0.91113900  | N                    | 3.44216600  | -1.06643100 | 0.95164600  | N                    | 1.24444700  | 2.62950200  | -0.61697800 | N                    | 1.41491900  | -1.75779300 | 0.77588700  |
| H                   | -4.47209400 | -2.19933000 | -0.63164800 | H                    | -4.50683700 | -1.41260600 | 0.69629500  | H                    | 4.44291000  | -1.19378100 | 0.97367700  | H                    | 2.06825300  | 3.01821600  | -1.05887300 | H                    | 2.36286500  | -1.84439400 | 1.12077700  |
| H                   | -2.80623300 | -2.61979900 | -0.37084200 | H                    | -3.28856700 | -0.97730700 | 1.85593800  | H                    | 2.87078000  | -1.56597700 | 1.61340400  | H                    | 0.40933800  | 3.19375800  | -0.54757100 | H                    | 0.73533600  | -2.45879400 | 1.03404600  |
| O                   | 1.26138400  | -0.42700700 | 1.04090700  | O                    | 1.01564100  | 1.49323900  | 2.00641000  | O                    | -1.77970800 | -0.42469500 | 0.75402300  | O                    | -3.02980200 | 1.02586100  | 1.24384500  | O                    | -3.38517600 | -1.33957400 | -1.01490800 |
| Ni                  | 2.79817300  | -1.00406600 | -0.10895800 | Ni                   | 1.81453400  | -1.57411300 | -0.21900700 | Ni                   | -1.54952700 | -1.83415200 | -0.42723800 | Ni                   | 2.74913400  | -1.02870400 | 0.19824200  | Ni                   | 3.72500200  | 0.42194300  | -0.03532700 |

## Molecule: Zn-GLN-01

|    |             |             |             |
|----|-------------|-------------|-------------|
| N  | 0.18312500  | 2.67950400  | -0.42937500 |
| H  | 0.57439000  | 2.32382700  | -1.30583200 |
| H  | 0.91925300  | 3.20317500  | 0.04932500  |
| H  | -0.58302300 | 3.32132700  | -0.64694200 |
| C  | -0.30528200 | 1.54128600  | 0.41460300  |
| H  | -0.59085600 | 1.95879600  | 1.37658300  |
| C  | -1.50943500 | 0.90709000  | -0.27873200 |
| C  | 0.83091800  | 0.54096700  | 0.62552500  |
| H  | -2.24952200 | 1.69270800  | -0.43903500 |
| H  | -1.20149800 | 0.53448700  | -1.25869500 |
| C  | -2.13805100 | -0.22080100 | 0.53423800  |
| O  | 1.67554700  | 0.47672800  | -0.34278800 |
| H  | -1.44195600 | -1.04792700 | 0.65914000  |
| H  | -2.39868900 | 0.14268300  | 1.53234300  |
| C  | -3.42022000 | -0.71093600 | -0.10199100 |
| O  | -4.29104900 | 0.07206300  | -0.50207200 |
| N  | -3.56209000 | -2.04004600 | -0.18842400 |
| H  | -4.41372100 | -2.42813700 | -0.56572900 |
| H  | -2.84718100 | -2.66466100 | 0.14713700  |
| O  | 0.84340400  | -0.14062700 | 1.64934700  |
| Zn | 3.04382500  | -0.90411400 | -0.29404900 |

## Molecule: Zn-GLN-04

|    |             |             |             |
|----|-------------|-------------|-------------|
| N  | -2.31316600 | -1.81574800 | -0.88269900 |
| H  | -2.85574900 | -1.32031400 | -1.59874900 |
| H  | -2.93981300 | -2.48257200 | -0.42902700 |
| H  | -1.54827900 | -2.33240600 | -1.32057800 |
| C  | -1.81259400 | -0.79920500 | 0.09826400  |
| H  | -1.53090200 | -1.33174800 | 1.00289900  |
| C  | -0.60200200 | -0.10245300 | -0.51723900 |
| C  | -2.96929500 | 0.17896100  | 0.39639100  |
| H  | 0.14518000  | -0.86787500 | -0.74356700 |
| H  | -0.89552300 | 0.36321600  | -1.46107400 |
| C  | 0.00943000  | 0.95251900  | 0.40812300  |
| O  | -3.80422500 | 0.34884800  | -0.52666700 |
| H  | -0.69422500 | 1.75947400  | 0.59555200  |
| H  | 0.27545400  | 0.49874700  | 1.36568300  |
| C  | 1.27098700  | 1.49894900  | -0.19043400 |
| O  | 2.30116200  | 0.78730800  | -0.35487300 |
| N  | 1.28818100  | 2.76296800  | -0.56461200 |
| H  | 2.12226800  | 3.16035400  | -0.97472700 |
| H  | 0.47445700  | 3.34562400  | -0.44225700 |
| O  | -2.95210300 | 0.73234600  | 1.51874500  |
| Zn | 2.49614000  | -1.09145600 | 0.26229200  |

## Molecule: Zn-GLN-022

|    |             |             |             |
|----|-------------|-------------|-------------|
| N  | -1.43516600 | 1.42281600  | 1.60653100  |
| H  | -1.77313500 | 0.46599800  | 1.74379200  |
| H  | -2.24706500 | 2.02745900  | 1.46143000  |
| H  | -0.96577000 | 1.71899300  | 2.46605000  |
| C  | -0.48604800 | 1.50856700  | 0.44663800  |
| H  | -0.20380400 | 2.55433100  | 0.36495300  |
| C  | 0.74024000  | 0.65490800  | 0.74759000  |
| C  | -1.20876300 | 1.12781400  | -0.85735800 |
| H  | 1.21749000  | 1.05921000  | 1.64087200  |
| H  | 0.43874500  | -0.36899800 | 0.98702500  |
| C  | 1.73897800  | 0.63439800  | -0.40506200 |
| O  | -1.85883600 | 0.01459300  | -0.90712100 |
| H  | 1.28520800  | 0.22563900  | -1.30774000 |
| H  | 2.06638700  | 1.65251500  | -0.63138800 |
| C  | 2.97204400  | -0.15814900 | -0.02924900 |
| O  | 3.57600900  | 0.05077300  | 1.03050300  |
| N  | 3.37019900  | -1.08882700 | -0.90591300 |
| H  | 4.20382600  | -1.62597300 | -0.71880100 |
| H  | 2.87303700  | -1.24352700 | -1.76752400 |
| O  | -1.12995200 | 1.90746700  | -1.80458000 |
| Zn | -1.58922100 | -1.57304800 | 0.16304100  |

## Molecule: Zn-GLN-031

|    |             |             |             |
|----|-------------|-------------|-------------|
| N  | -1.14756000 | 2.67578000  | -0.83820000 |
| H  | -1.07867200 | 3.25871300  | 0.00109300  |
| H  | -2.11928200 | 2.70074100  | -1.15402500 |
| H  | -0.55508100 | 3.07172200  | -1.57116900 |
| C  | -0.72323900 | 1.27822900  | -0.50958600 |
| H  | -0.95190500 | 0.66223800  | -1.37764100 |
| C  | 0.77955500  | 1.28849600  | -0.23059300 |
| C  | -1.54716300 | 0.81552100  | 0.69720200  |
| H  | 1.27122800  | 1.72719100  | -1.09925800 |
| H  | 0.97561300  | 1.93999500  | 0.62460200  |
| C  | 1.36129800  | -0.09384400 | 0.02822800  |
| O  | -1.93592600 | 1.66251800  | 1.50479700  |
| H  | 0.97079600  | -0.52188200 | 0.95042200  |
| H  | 1.08361500  | -0.77524700 | -0.78535500 |
| C  | 2.87527000  | -0.07647400 | 0.06896000  |
| O  | 3.54431100  | 0.63863100  | -0.68611600 |
| N  | 3.44172300  | -0.90928600 | 0.95190700  |
| H  | 4.44697900  | -0.98260800 | 0.99566000  |
| H  | 2.88281800  | -1.47343500 | 1.57115200  |
| O  | -1.76906200 | -0.44289900 | 0.82308400  |
| Zn | -1.27247200 | -1.87034800 | -0.41369400 |

## Molecule: Zn-GLN-051

|    |             |             |             |
|----|-------------|-------------|-------------|
| N  | 3.11977600  | -1.95208300 | 0.29116400  |
| H  | 3.49247200  | -1.64824700 | 1.19760900  |
| H  | 3.90087300  | -2.31799500 | -0.25580200 |
| H  | 2.43771900  | -2.70058300 | 0.42675600  |
| C  | 2.51627100  | -0.75387000 | -0.37671900 |
| H  | 2.42945500  | -0.98110100 | -1.43585300 |
| C  | 1.13916900  | -0.50905300 | 0.23624500  |
| C  | 3.47374100  | 0.43717500  | -0.16542300 |
| H  | 0.52863500  | -1.39623400 | 0.06049200  |
| H  | 1.24332200  | -0.38192000 | 1.31649400  |
| C  | 0.44077300  | 0.71679500  | -0.35990100 |
| O  | 4.15741300  | 0.42037500  | 0.88860500  |
| H  | 0.94157100  | 1.63522100  | -0.06251200 |
| H  | 0.45618700  | 0.65793400  | -1.45016000 |
| C  | -1.00220100 | 0.75697400  | 0.04787200  |
| O  | -1.75528000 | -0.17403600 | -0.34721800 |
| N  | -1.42697400 | 1.75443700  | 0.79562800  |
| H  | -2.39726100 | 1.80396900  | 1.07690500  |
| H  | -0.79390900 | 2.48242000  | 1.09095000  |
| O  | 3.45612800  | 1.32409300  | -1.04813800 |
| Zn | -3.67870900 | -0.40738400 | -0.06036200 |

## Molecule: Cd-GLY-01

|    |             |             |             |
|----|-------------|-------------|-------------|
| N  | 3.46250700  | -0.57662500 | -0.00014200 |
| H  | 3.27486700  | -1.15065800 | -0.82510200 |
| C  | 2.61104100  | 0.64194800  | 0.00022500  |
| H  | 3.27426500  | -1.15161200 | 0.82403300  |
| H  | 4.45207900  | -0.31920400 | 0.00034600  |
| C  | 1.14231800  | 0.28873500  | 0.00003800  |
| H  | 2.84831700  | 1.22769200  | 0.88508000  |
| H  | 2.84838000  | 1.22827800  | -0.88422400 |
| O  | 0.78310300  | -0.91182300 | 0.00007100  |
| O  | 0.33072100  | 1.26001300  | -0.00018200 |
| Cd | -1.50762900 | -0.08682800 | 0.00000300  |

## Molecule: Cd-GLY-021

|    |             |             |             |
|----|-------------|-------------|-------------|
| N  | 3.13475800  | -1.08570700 | -0.08208500 |
| H  | 3.72482700  | -0.49851600 | 0.51232200  |
| C  | 1.69921000  | -0.78355000 | 0.15809200  |
| H  | 3.38866400  | -0.88996900 | -1.05260700 |
| H  | 3.33672100  | -2.06790000 | 0.11391500  |
| C  | 1.43749800  | 0.71035000  | 0.03945200  |
| H  | 1.10413100  | -1.34076100 | -0.56134100 |
| H  | 1.44531600  | -1.11844900 | 1.16210500  |
| O  | 2.39516500  | 1.47911700  | -0.08216500 |
| O  | 0.21437300  | 1.09593800  | 0.10198600  |
| Cd | -1.55499000 | -0.13845200 | -0.01965900 |

## Molecule: Cu-GLY-02

|    |             |             |             |
|----|-------------|-------------|-------------|
| N  | -2.76590500 | -0.91193700 | 0.05007400  |
| H  | -3.25678400 | -0.40443300 | -0.68995100 |
| C  | -1.29366600 | -0.79084600 | -0.11936400 |
| H  | -3.06158300 | -0.50810800 | 0.94189000  |
| H  | -3.05444000 | -1.89203200 | 0.02009700  |
| C  | -0.87458500 | 0.66400900  | -0.05182800 |
| H  | -0.80660700 | -1.35748500 | 0.67174400  |
| H  | -1.01960200 | -1.21803500 | -1.08107800 |
| O  | -1.70493000 | 1.53990300  | 0.16189800  |
| O  | 0.38318000  | 0.89963400  | -0.25401400 |
| Cu | 1.86702900  | -0.24109000 | 0.05347800  |

## Molecule: Cu-GLY-011

|    |             |             |             |
|----|-------------|-------------|-------------|
| N  | -3.03203500 | -0.41872600 | -0.00110100 |
| H  | -2.90277900 | -1.01455900 | 0.82013800  |
| C  | -2.05752400 | 0.70500700  | 0.00204300  |
| H  | -2.90825200 | -1.00503800 | -0.82999000 |
| H  | -3.98936700 | -0.06000200 | 0.00392300  |
| C  | -0.64909900 | 0.17816400  | -0.00018800 |
| H  | -2.22718000 | 1.31725500  | -0.88068300 |
| H  | -2.22564400 | 1.31089200  | 0.88952100  |
| O  | -0.39741900 | -1.03631000 | 0.00047500  |
| O  | 0.29418200  | 1.05239800  | -0.00179600 |
| Cu | 1.81183100  | -0.10500700 | 0.00014600  |

## Molecule: Fe-GLY-01

|    |             |             |             |
|----|-------------|-------------|-------------|
| N  | 2.77628600  | -0.60158800 | 0.14687000  |
| H  | 2.68565800  | -1.22541500 | -0.65983300 |
| C  | 2.00353900  | 0.65546300  | -0.04460800 |
| H  | 2.44772400  | -1.10984300 | 0.97370900  |
| H  | 3.76778100  | -0.38587700 | 0.27930000  |
| C  | 0.54555600  | 0.35552300  | -0.12751400 |
| H  | 2.18458800  | 1.31401900  | 0.80217900  |
| H  | 2.33978500  | 1.14922700  | -0.95539600 |
| O  | 0.12257000  | -0.83472000 | -0.25801000 |
| O  | -0.34534000 | 1.25421200  | 0.00666500  |
| Fe | -1.78353700 | -0.19049400 | 0.06059400  |

## Molecule: Fe-GLY-02

|    |             |             |             |
|----|-------------|-------------|-------------|
| N  | -2.67645100 | -0.92577000 | -0.09714500 |
| H  | -2.91230600 | -0.59302100 | -1.03586200 |
| C  | -1.22911200 | -0.76701800 | 0.17580600  |
| H  | -3.23944800 | -0.39941900 | 0.57584500  |
| H  | -2.93447000 | -1.91399300 | -0.03199600 |
| C  | -0.80301100 | 0.67312000  | 0.05150400  |
| H  | -1.02092800 | -1.11620400 | 1.18612000  |
| H  | -0.66954900 | -1.38080500 | -0.52884100 |
| O  | -1.57899200 | 1.58819200  | -0.08596300 |
| O  | 0.51374600  | 0.87254400  | 0.12674200  |
| Fe | 1.93179100  | -0.27841000 | -0.04520500 |

## Molecule: Hg-GLY-011

|    |             |             |             |
|----|-------------|-------------|-------------|
| N  | -4.11292400 | -0.31289500 | -0.01207100 |
| H  | -4.15666100 | -0.72865700 | 0.92118800  |
| C  | -3.04422500 | 0.71797900  | -0.08223300 |
| H  | -3.93035400 | -1.06937600 | -0.67637000 |
| H  | -5.02307200 | 0.10076500  | -0.22449600 |
| C  | -1.67776700 | 0.07385300  | 0.05170600  |
| H  | -3.10732900 | 1.21158300  | -1.04961100 |
| H  | -3.21422100 | 1.45032800  | 0.70133900  |
| O  | -1.55152800 | -1.14678800 | 0.04845400  |
| O  | -0.72463100 | 0.94122000  | 0.12690000  |
| Hg | 1.18454200  | -0.02351000 | -0.01009000 |

## Molecule: Hg-GLY-021

|    |             |             |             |
|----|-------------|-------------|-------------|
| N  | -3.50514300 | -1.09758000 | -0.07440900 |
| H  | -3.78305200 | -0.88349200 | -1.03489800 |
| C  | -2.07042300 | -0.78478300 | 0.14297100  |
| H  | -4.09320400 | -0.53867100 | 0.54886500  |
| H  | -3.68570200 | -2.08809100 | 0.10159100  |
| C  | -1.83075800 | 0.70893800  | 0.03430500  |
| H  | -1.79183600 | -1.12582900 | 1.13845500  |
| H  | -1.48000000 | -1.32642700 | -0.59206800 |
| O  | -2.78320400 | 1.47567600  | -0.07091000 |
| O  | -0.60819200 | 1.14302800  | 0.08859300  |
| Hg | 1.12385100  | -0.08561200 | -0.01057700 |

## Molecule: Mn-GLY-01

|    |             |             |             |
|----|-------------|-------------|-------------|
| N  | -3.09489800 | -0.35730300 | -0.01718000 |
| H  | -2.95002300 | -1.03516800 | 0.73439200  |
| C  | -2.06397100 | 0.71552800  | 0.03876300  |
| H  | -3.03374300 | -0.86701700 | -0.90127400 |
| H  | -4.03360900 | 0.03693500  | 0.06793300  |
| C  | -0.66760800 | 0.12336500  | -0.00470000 |
| H  | -2.22343500 | 1.38483700  | -0.80252000 |
| H  | -2.19996600 | 1.27205200  | 0.96331500  |
| O  | -0.52646700 | -1.11120800 | 0.00519100  |
| O  | 0.27778000  | 0.97636500  | -0.03685300 |
| Mn | 2.17936100  | -0.08980500 | 0.00429300  |

## Molecule: Ni-GLY-01

|    |             |             |             |
|----|-------------|-------------|-------------|
| N  | 2.87205100  | -0.55423300 | 0.00022800  |
| H  | 2.69503200  | -1.13050700 | -0.82658300 |
| C  | 2.01742100  | 0.65903400  | -0.00021600 |
| H  | 2.69545000  | -1.12961800 | 0.82774700  |
| H  | 3.85903800  | -0.28473100 | -0.00015400 |
| C  | 0.56381000  | 0.30616000  | -0.00008700 |
| H  | 2.24380200  | 1.25108500  | 0.88433600  |
| H  | 2.24375600  | 1.25036700  | -0.88527200 |
| O  | 0.16180700  | -0.89580200 | -0.00025100 |
| O  | -0.30298000 | 1.23264000  | 0.00013600  |
| Ni | -1.72140800 | -0.16295800 | 0.00003800  |

## Molecule: Zn-GLY-01

|    |             |             |             |
|----|-------------|-------------|-------------|
| N  | 2.74136700  | -0.96338400 | -0.00021500 |
| H  | 2.39037000  | -1.45671900 | -0.82366200 |
| C  | 2.28288800  | 0.45271700  | 0.00023000  |
| H  | 2.39096600  | -1.45668900 | 0.82348500  |
| H  | 3.76225700  | -1.01319400 | -0.00054200 |
| C  | 0.77130000  | 0.57041000  | 0.00009500  |
| H  | 2.68342800  | 0.94126600  | 0.88496400  |
| H  | 2.68363200  | 0.94199100  | -0.88400100 |
| O  | 0.11775500  | -0.53647900 | 0.00015600  |
| O  | 0.27726100  | 1.69917400  | -0.00021200 |
| Zn | -1.81951600 | -0.22177600 | -0.00000800 |

## Molecule: Mn-GLY-02

|    |             |             |             |
|----|-------------|-------------|-------------|
| N  | -2.63210800 | -1.02757500 | 0.01968900  |
| H  | -3.09679700 | -0.58357200 | -0.77521000 |
| C  | -1.16390700 | -0.79482200 | -0.04105800 |
| H  | -3.02702800 | -0.61483700 | 0.86756200  |
| H  | -2.84697200 | -2.02619200 | 0.00937000  |
| C  | -0.85410800 | 0.69690300  | -0.01314000 |
| H  | -0.70310700 | -1.29326000 | 0.80875600  |
| H  | -0.78705800 | -1.24039000 | -0.95890500 |
| O  | -1.79420400 | 1.50221400  | 0.03238100  |
| O  | 0.38038300  | 1.01170000  | -0.04295300 |
| Mn | 2.09217500  | -0.26290100 | 0.01281500  |

## Molecule: Ni-GLY-02

|    |             |             |             |
|----|-------------|-------------|-------------|
| N  | 2.78522700  | -0.88133200 | 0.00005600  |
| H  | 3.17615900  | -0.41850800 | 0.82444900  |
| C  | 1.30293900  | -0.79977700 | -0.00011700 |
| H  | 3.17633000  | -0.41818000 | -0.82406900 |
| H  | 3.08826800  | -1.85786700 | -0.00010200 |
| C  | 0.85458800  | 0.64445700  | -0.00004800 |
| H  | 0.92740500  | -1.30932400 | -0.88535900 |
| H  | 0.92715800  | -1.30948900 | 0.88492600  |
| O  | 1.66519700  | 1.55507900  | 0.00014900  |
| O  | -0.43545400 | 0.86171200  | -0.00024500 |
| Ni | -1.91339300 | -0.24713300 | 0.00005400  |

## Molecule: Zn-GLY-02

|    |             |             |             |
|----|-------------|-------------|-------------|
| N  | 2.71030000  | -0.99943700 | -0.11836700 |
| H  | 3.30259900  | -0.32228500 | 0.36880500  |
| C  | 1.28156700  | -0.77003000 | 0.22195000  |
| H  | 2.86795200  | -0.87471800 | -1.12070300 |
| H  | 2.99939100  | -1.94510600 | 0.13943100  |
| C  | 0.91917100  | 0.69597300  | 0.05551300  |
| H  | 0.66785000  | -1.40192100 | -0.41508300 |
| H  | 1.12759700  | -1.05931100 | 1.26000600  |
| O  | 1.81402700  | 1.52838900  | -0.09577800 |
| O  | -0.33140000 | 0.99024400  | 0.12505100  |
| Zn | -1.83343100 | -0.23684400 | -0.04342800 |



## Molecule: Cd-ILE-01

|    |             |             |             |
|----|-------------|-------------|-------------|
| N  | 1.67143900  | 2.49411600  | -0.23471700 |
| H  | 1.46704900  | 2.63535200  | 0.75717200  |
| H  | 1.03350900  | 3.09096000  | -0.76526800 |
| H  | 2.63096100  | 2.79698900  | -0.41620100 |
| C  | 1.50582800  | 1.05457700  | -0.61912400 |
| H  | 1.70163400  | 1.00185900  | -1.68754800 |
| C  | 2.52791800  | 0.18044000  | 0.13900700  |
| C  | 0.06358800  | 0.64652800  | -0.36319500 |
| H  | 3.46910500  | 0.73888200  | 0.09579700  |
| C  | 2.14975800  | -0.02466200 | 1.60625100  |
| C  | 2.75277400  | -1.14454500 | -0.59996900 |
| O  | -0.66020700 | 1.35159200  | 0.37837100  |
| H  | 1.26313300  | -0.65714600 | 1.69547000  |
| H  | 2.96375600  | -0.51216900 | 2.14053600  |
| H  | 1.94744000  | 0.91729700  | 2.12000600  |
| H  | 2.92820100  | -0.92572200 | -1.65657600 |
| H  | 1.84281800  | -1.74568500 | -0.54992900 |
| C  | 3.92859700  | -1.94734300 | -0.05287900 |
| H  | 3.75118600  | -2.28654800 | 0.96869600  |
| H  | 4.10217200  | -2.83283400 | -0.66690600 |
| H  | 4.84608100  | -1.35335100 | -0.05521000 |
| O  | -0.33610400 | -0.42641300 | -0.90336400 |
| Cd | -2.40098800 | -0.38162700 | 0.06671600  |

## Molecule: Cd-ILE-02

|    |             |             |             |
|----|-------------|-------------|-------------|
| N  | 2.08112300  | -1.62875300 | 1.38960300  |
| H  | 2.72224200  | -2.04404100 | 0.70826100  |
| H  | 1.55987400  | -2.39516200 | 1.82010600  |
| H  | 2.61962400  | -1.15246900 | 2.11615600  |
| C  | 1.15015200  | -0.68035000 | 0.69815900  |
| H  | 0.35780100  | -0.45231800 | 1.40818500  |
| C  | 1.89244300  | 0.62127900  | 0.33204300  |
| C  | 0.57201800  | -1.41592100 | -0.51580100 |
| H  | 2.41077100  | 0.92333500  | 1.24889100  |
| C  | 2.93286700  | 0.42404400  | -0.77054100 |
| C  | 0.89052600  | 1.73110900  | -0.00939700 |
| O  | 1.24146900  | -2.31921800 | -1.02911400 |
| H  | 2.45394400  | 0.20935900  | -1.72810900 |
| H  | 3.52899300  | 1.32781900  | -0.88766200 |
| H  | 3.62389300  | -0.39003600 | -0.54617600 |
| H  | 0.11443300  | 1.74890200  | 0.76534400  |
| H  | 0.39098800  | 1.48849100  | -0.95041800 |
| C  | 1.52234500  | 3.11474600  | -0.11036300 |
| H  | 2.22839100  | 3.17883000  | -0.93919700 |
| H  | 0.75437200  | 3.87278600  | -0.27455600 |
| H  | 2.05586400  | 3.37209200  | 0.80793100  |
| O  | -0.56457600 | -1.03170000 | -0.96523700 |
| Cd | -2.05346500 | 0.11982500  | 0.10279700  |

## Molecule: Cu-ILE-01

|    |             |             |             |
|----|-------------|-------------|-------------|
| N  | 0.76420200  | 2.47535800  | -0.28020200 |
| H  | 0.52741700  | 2.61018400  | 0.70609700  |
| H  | 0.05413200  | 2.95931300  | -0.83519600 |
| H  | 1.66911500  | 2.91777400  | -0.45586300 |
| C  | 0.82969900  | 1.02204100  | -0.63616400 |
| H  | 1.01444600  | 0.97467700  | -1.70752000 |
| C  | 1.98440600  | 0.32932400  | 0.12113400  |
| C  | -0.51518100 | 0.40720700  | -0.35260400 |
| H  | 2.82557300  | 1.02659600  | 0.04800900  |
| C  | 1.66289200  | 0.10047200  | 1.59785400  |
| C  | 2.39302500  | -0.95873300 | -0.60467700 |
| O  | -1.36530700 | 0.99836200  | 0.37392500  |
| H  | 0.88748800  | -0.66014200 | 1.71728800  |
| H  | 2.55134800  | -0.24433100 | 2.12426600  |
| H  | 1.32623600  | 1.01022600  | 2.09817400  |
| H  | 2.54122800  | -0.72545000 | -1.66213900 |
| H  | 1.57405300  | -1.67959800 | -0.55339000 |
| C  | 3.66639700  | -1.58565000 | -0.04769700 |
| H  | 3.53121000  | -1.94836200 | 0.97201500  |
| H  | 3.97005700  | -2.43597100 | -0.66095800 |
| H  | 4.48871000  | -0.86579900 | -0.04305900 |
| O  | -0.81673700 | -0.73242900 | -0.81969300 |
| Cu | -2.58556900 | -0.63041600 | 0.11423300  |

## Molecule: Cu-ILE-02

|    |             |             |             |
|----|-------------|-------------|-------------|
| N  | -1.46952500 | -1.85983600 | -1.28406500 |
| H  | -2.01992300 | -2.31803000 | -0.55265000 |
| H  | -0.87098700 | -2.57202600 | -1.70771000 |
| H  | -2.10355700 | -1.49816400 | -1.99999400 |
| C  | -0.64817100 | -0.75544900 | -0.69741500 |
| H  | 0.05547500  | -0.44458600 | -1.46847300 |
| C  | -1.54984200 | 0.43798900  | -0.32424300 |
| C  | 0.12395200  | -1.34637100 | 0.48469000  |
| H  | -2.09051400 | 0.67862000  | -1.24628100 |
| C  | -2.57135000 | 0.10029600  | 0.76122700  |
| C  | -0.69952600 | 1.65902700  | 0.04227200  |
| O  | -0.35527100 | -2.28331000 | 1.11623900  |
| H  | -2.08329300 | -0.09988100 | 1.71676400  |
| H  | -3.25288800 | 0.93833000  | 0.90008800  |
| H  | -3.18381600 | -0.76547400 | 0.50245600  |
| H  | 0.10078600  | 1.76472300  | -0.70098300 |
| H  | -0.21479200 | 1.48431600  | 1.00667200  |
| C  | -1.49312400 | 2.95897500  | 0.09828600  |
| H  | -2.25113400 | 2.93597600  | 0.88236900  |
| H  | -0.83082000 | 3.80157900  | 0.30370200  |
| H  | -1.99606000 | 3.15101300  | -0.85246800 |
| O  | 1.26415800  | -0.81508500 | 0.79330200  |
| Cu | 2.23398200  | 0.42837600  | -0.18138900 |

## Molecule: Fe-ILE-01

|    |             |             |             |
|----|-------------|-------------|-------------|
| N  | 0.66302600  | 2.45979600  | -0.15905200 |
| H  | 0.44985800  | 2.53657700  | 0.83998500  |
| H  | -0.06949300 | 2.95790400  | -0.67218200 |
| H  | 1.55426600  | 2.93160800  | -0.33032100 |
| C  | 0.76257700  | 1.02907200  | -0.58930100 |
| H  | 0.97500600  | 1.03272000  | -1.65683300 |
| C  | 1.90155700  | 0.31195700  | 0.17837900  |
| C  | -0.57627500 | 0.39454300  | -0.36615200 |
| H  | 2.68288100  | 1.07112800  | 0.28417200  |
| C  | 1.46662100  | -0.13863600 | 1.57186400  |
| C  | 2.48128300  | -0.82227800 | -0.67247200 |
| O  | -1.45150300 | 0.95847900  | 0.35772300  |
| H  | 0.75992500  | -0.97022600 | 1.51217800  |
| H  | 2.32903800  | -0.47393900 | 2.14449800  |
| H  | 0.99723800  | 0.66948300  | 2.13593500  |
| H  | 2.74285900  | -0.41298100 | -1.65161700 |
| H  | 1.71373300  | -1.58261400 | -0.84117000 |
| C  | 3.71684200  | -1.45880000 | -0.04570000 |
| H  | 3.47572600  | -2.00097300 | 0.86940400  |
| H  | 4.17385700  | -2.16646200 | -0.73912100 |
| H  | 4.46409100  | -0.69991800 | 0.20008700  |
| O  | -0.90125800 | -0.73729100 | -0.85375900 |
| Fe | -2.71475800 | -0.68367400 | 0.09719000  |

## Molecule: Fe-ILE-022

|    |             |             |             |
|----|-------------|-------------|-------------|
| N  | 1.39540000  | -1.95779800 | 1.25593300  |
| H  | 1.94391200  | -2.40910900 | 0.51887300  |
| H  | 0.77689400  | -2.66823600 | 1.65485400  |
| H  | 2.03330500  | -1.63500200 | 1.98710600  |
| C  | 0.61026600  | -0.80634100 | 0.71187000  |
| H  | -0.01833000 | -0.44315900 | 1.52417500  |
| C  | 1.56209400  | 0.31752600  | 0.24386500  |
| C  | -0.27085600 | -1.35657500 | -0.39702300 |
| H  | 2.31531400  | 0.38910000  | 1.03495600  |
| C  | 2.26612200  | -0.01550200 | -1.07004100 |
| C  | 0.82859300  | 1.66162300  | 0.19832900  |
| O  | -0.03004000 | -2.39384700 | -0.97017800 |
| H  | 1.56917500  | 0.02412700  | -1.91018200 |
| H  | 3.05960000  | 0.70573100  | -1.25864500 |
| H  | 2.72812500  | -1.00377100 | -1.05656800 |
| H  | 0.31870300  | 1.80734400  | 1.15481600  |
| H  | 0.05296800  | 1.62458500  | -0.57563300 |
| C  | 1.74915900  | 2.84730700  | -0.06444800 |
| H  | 2.19202600  | 2.80515500  | -1.05987700 |
| H  | 1.19378000  | 3.78339400  | 0.01147800  |
| H  | 2.56129800  | 2.87886700  | 0.66616000  |
| O  | -1.31661700 | -0.61141700 | -0.73586900 |
| Fe | -2.31513800 | 0.61536400  | 0.17038500  |

|                     |             |             |             |                     |             |             |             |                      |             |             |             |
|---------------------|-------------|-------------|-------------|---------------------|-------------|-------------|-------------|----------------------|-------------|-------------|-------------|
| Molecule: Hg-ILE-01 |             |             |             | Molecule: Hg-ILE-02 |             |             |             | Molecule: Hg-ILE-011 |             |             |             |
| N                   | 2.68103600  | 2.37203200  | -0.46260000 | N                   | -2.72369600 | -1.41921000 | -1.36861800 | N                    | 2.68096900  | 2.37230300  | -0.46205100 |
| H                   | 2.59656000  | 2.65381400  | 0.51699600  | H                   | -3.38134000 | -1.76498200 | -0.66469000 | H                    | 2.59656800  | 2.65385100  | 0.51762600  |
| H                   | 2.14786700  | 3.04346100  | -1.01936000 | H                   | -2.33868800 | -2.23452600 | -1.84970800 | H                    | 2.14770800  | 3.04383700  | -1.01859700 |
| H                   | 3.66407600  | 2.43083600  | -0.73797700 | H                   | -3.22852200 | -0.84538800 | -2.04662200 | H                    | 3.66398000  | 2.43120900  | -0.73750600 |
| C                   | 2.16730900  | 0.98016800  | -0.66826200 | C                   | -1.63455500 | -0.62548800 | -0.71029800 | C                    | 2.16729800  | 0.98045800  | -0.66799600 |
| H                   | 2.18655500  | 0.80292900  | -1.74041600 | H                   | -0.89792900 | -0.41119700 | -1.48085600 | H                    | 2.18673200  | 0.80336800  | -1.74017100 |
| C                   | 3.08229300  | -0.03897800 | 0.03986500  | C                   | -2.23192200 | 0.69479000  | -0.16467900 | C                    | 3.08215200  | -0.03878500 | 0.04017900  |
| C                   | 0.71756800  | 0.94475100  | -0.18143900 | C                   | -1.02463000 | -1.54067600 | 0.35181800  | C                    | 0.71748800  | 0.94496000  | -0.18142400 |
| H                   | 4.10013300  | 0.24791900  | -0.24717700 | H                   | -2.97018600 | 0.99624300  | -0.91530500 | H                    | 4.10012100  | 0.24882800  | -0.24567600 |
| C                   | 2.96923400  | 0.02391500  | 1.56262100  | C                   | -2.95316800 | 0.51013900  | 1.16955000  | C                    | 2.96763600  | 0.02282200  | 1.56288300  |
| C                   | 2.83921000  | -1.45164000 | -0.50721500 | C                   | -1.18789500 | 1.81631100  | -0.10964500 | C                    | 2.84023600  | -1.45111300 | -0.50827700 |
| O                   | 0.29278100  | 1.79449100  | 0.59464700  | O                   | -1.70634900 | -2.44971800 | 0.82129900  | O                    | 0.29251600  | 1.79467300  | 0.59458700  |
| H                   | 1.97848500  | -0.29447600 | 1.89537000  | H                   | -2.24354400 | 0.27941900  | 1.96728700  | H                    | 1.97698500  | -0.29708400 | 1.89448000  |
| H                   | 3.70493700  | -0.63643300 | 2.01973100  | H                   | -3.47644000 | 1.42535900  | 1.44326200  | H                    | 3.70376700  | -0.63691100 | 2.02018400  |
| H                   | 3.15355500  | 1.02540800  | 1.95537900  | H                   | -3.69554600 | -0.28836100 | 1.13114800  | H                    | 3.15028000  | 1.02427300  | 1.95652300  |
| H                   | 2.78608700  | -1.39895500 | -1.59755000 | H                   | -0.59477500 | 1.78680800  | -1.02880900 | H                    | 2.78917800  | -1.39769100 | -1.59868100 |
| H                   | 1.86743800  | -1.81224600 | -0.16339400 | H                   | -0.49900100 | 1.63204900  | 0.72193600  | H                    | 1.86784700  | -1.81200300 | -0.16650700 |
| C                   | 3.92482700  | -2.44562800 | -0.10775400 | C                   | -1.80171900 | 3.20450800  | 0.03725100  | C                    | 3.92520100  | -2.44527100 | -0.10747400 |
| H                   | 3.95671900  | -2.60300500 | 0.97123400  | H                   | -2.33334800 | 3.31741200  | 0.98286100  | H                    | 3.95509900  | -2.60342600 | 0.97145500  |
| H                   | 3.74333100  | -3.41538800 | -0.57490200 | H                   | -1.02675100 | 3.97176600  | 0.00013100  | H                    | 3.74469700  | -3.41470700 | -0.57567700 |
| H                   | 4.91119800  | -2.10038000 | -0.42727900 | H                   | -2.50820100 | 3.40236900  | -0.77281600 | H                    | 4.91212900  | -2.09966600 | -0.42489000 |
| O                   | 0.06162500  | -0.05402600 | -0.66617600 | O                   | 0.18853500  | -1.34045300 | 0.75403700  | O                    | 0.06169500  | -0.05389800 | -0.66622700 |
| Hg                  | -1.95752600 | -0.20683700 | 0.02666100  | Hg                  | 1.56757500  | 0.05789200  | -0.04942700 | Hg                   | -1.95744500 | -0.20693300 | 0.02659500  |

  

|                     |             |             |             |                     |             |             |             |
|---------------------|-------------|-------------|-------------|---------------------|-------------|-------------|-------------|
| Molecule: Mn-ILE-11 |             |             |             | Molecule: Mn-ILE-23 |             |             |             |
| N                   | 1.09623700  | 2.51023200  | -0.15227100 | N                   | 1.58462900  | -1.63779100 | 1.38766100  |
| H                   | 0.70264800  | 2.62870100  | 0.78463100  | H                   | 2.22147900  | -2.05199600 | 0.70220900  |
| H                   | 0.59512600  | 3.14932300  | -0.77219300 | H                   | 1.06564200  | -2.40589200 | 1.81713800  |
| H                   | 2.08367400  | 2.77334400  | -0.14104800 | H                   | 2.12603600  | -1.16386500 | 2.11316800  |
| C                   | 0.92421900  | 1.09014100  | -0.60245700 | C                   | 0.64977700  | -0.68810500 | 0.70036200  |
| H                   | 1.15008200  | 1.07371100  | -1.66563900 | H                   | -0.12969600 | -0.44987000 | 1.42146200  |
| C                   | 1.90708600  | 0.17102200  | 0.15606500  | C                   | 1.40281800  | 0.59894500  | 0.30643200  |
| C                   | -0.53365000 | 0.70525300  | -0.37145300 | C                   | 0.03748100  | -1.42694900 | -0.49644700 |
| H                   | 2.85164400  | 0.72403200  | 0.19718600  | H                   | 1.98869200  | 0.87727200  | 1.18957400  |
| C                   | 1.45582300  | -0.11750100 | 1.58846500  | C                   | 2.36323200  | 0.38858100  | -0.86458700 |
| C                   | 2.17227200  | -1.10701100 | -0.64789200 | C                   | 0.41641700  | 1.74231300  | 0.04333300  |
| O                   | -1.20906900 | 1.37915700  | 0.43327900  | O                   | 0.66235700  | -2.38655700 | -0.97519700 |
| H                   | 0.57414100  | -0.76297400 | 1.59961800  | H                   | 1.81532300  | 0.21129900  | -1.79251200 |
| H                   | 2.24696300  | -0.62341200 | 2.13972200  | H                   | 2.98208700  | 1.27374000  | -1.00495300 |
| H                   | 1.21261800  | 0.79497400  | 2.13602800  | H                   | 3.03726000  | -0.45422300 | -0.70373100 |
| H                   | 2.44109800  | -0.82036300 | -1.66805600 | H                   | -0.29979800 | 1.78043200  | 0.87188700  |
| H                   | 1.25174600  | -1.69039700 | -0.71754400 | H                   | -0.16176500 | 1.52003700  | -0.85727000 |
| C                   | 3.28431200  | -1.96966200 | -0.05949900 | C                   | 1.08479600  | 3.10417100  | -0.10385700 |
| H                   | 3.00553200  | -2.38969500 | 0.90788000  | H                   | 1.70277300  | 3.15802100  | -1.00102000 |
| H                   | 3.51361100  | -2.80307600 | -0.72599400 | H                   | 0.33283700  | 3.89203200  | -0.17520900 |
| H                   | 4.20057300  | -1.38969400 | 0.07768500  | H                   | 1.72126500  | 3.32522500  | 0.75661700  |
| O                   | -0.95730900 | -0.32357600 | -0.98161300 | O                   | -1.06590200 | -0.97819900 | -0.94080600 |
| Mn                  | -2.85729800 | -0.77256800 | 0.11683700  | Mn                  | -2.47973300 | 0.26226500  | 0.19062500  |

## Molecule: Ni-ILE-01

|    |             |             |             |
|----|-------------|-------------|-------------|
| N  | 0.72576500  | 2.48370500  | -0.30743800 |
| H  | 0.42798400  | 2.61690300  | 0.66281000  |
| H  | 0.06061300  | 2.97800400  | -0.90742600 |
| H  | 1.64614700  | 2.91504900  | -0.42236000 |
| C  | 0.79438500  | 1.03200000  | -0.66827900 |
| H  | 0.98370100  | 0.98379400  | -1.73796400 |
| C  | 1.94564500  | 0.33300900  | 0.09211400  |
| C  | -0.54410600 | 0.40769200  | -0.38490100 |
| H  | 2.80697400  | 0.99498300  | -0.04695400 |
| C  | 1.66813800  | 0.19181100  | 1.58774500  |
| C  | 2.27961300  | -1.00737900 | -0.57471200 |
| O  | -1.33080800 | 0.90333600  | 0.48072100  |
| H  | 0.87082100  | -0.53163200 | 1.77295900  |
| H  | 2.56276600  | -0.15924500 | 2.09923800  |
| H  | 1.38439000  | 1.13741100  | 2.05205100  |
| H  | 2.39882200  | -0.83999100 | -1.64812100 |
| H  | 1.43793400  | -1.69331700 | -0.45410400 |
| C  | 3.54596500  | -1.65278000 | -0.02235100 |
| H  | 3.43014800  | -1.94925700 | 1.02095400  |
| H  | 3.79480400  | -2.54958700 | -0.59245100 |
| H  | 4.39632400  | -0.96940600 | -0.08607700 |
| O  | -0.90111800 | -0.65570000 | -0.97503900 |
| Ni | -2.55586500 | -0.64738700 | 0.15058400  |

## Molecule: Zn-ILE-01

|    |             |             |             |
|----|-------------|-------------|-------------|
| N  | 1.43307000  | 2.37618300  | -0.60729800 |
| H  | 1.24399500  | 2.72444300  | 0.33592400  |
| H  | 0.88950900  | 2.94544400  | -1.25903300 |
| H  | 2.42562700  | 2.49877400  | -0.81903200 |
| C  | 1.04176300  | 0.93269000  | -0.71067400 |
| H  | 0.97909000  | 0.70454600  | -1.77128200 |
| C  | 2.12429200  | 0.04745800  | -0.06402900 |
| C  | -0.34782900 | 0.78568000  | -0.08743300 |
| H  | 3.05727200  | 0.34313500  | -0.55658600 |
| C  | 2.27172900  | 0.29269000  | 1.43691000  |
| C  | 1.88076800  | -1.43030600 | -0.39353600 |
| O  | -0.74073300 | 1.60834000  | 0.74320600  |
| H  | 1.38319500  | -0.03816200 | 1.97868900  |
| H  | 3.12674500  | -0.26082000 | 1.82329000  |
| H  | 2.44174900  | 1.34522200  | 1.67131800  |
| H  | 1.62175000  | -1.51634700 | -1.45187200 |
| H  | 1.01570200  | -1.78651700 | 0.17008900  |
| C  | 3.08528000  | -2.31915800 | -0.10245200 |
| H  | 3.33449400  | -2.33318300 | 0.95949700  |
| H  | 2.88117600  | -3.34783900 | -0.40530900 |
| H  | 3.96660800  | -1.97699300 | -0.65053200 |
| O  | -0.99478300 | -0.23644300 | -0.51408200 |
| Zn | -2.82834300 | -0.55881600 | 0.06400700  |

## Molecule: Ni-ILE-022

|    |             |             |             |
|----|-------------|-------------|-------------|
| N  | 1.70423400  | -1.78096200 | 1.23882600  |
| H  | 2.21612100  | -2.22026500 | 0.46917600  |
| H  | 1.19842700  | -2.52223100 | 1.72892500  |
| H  | 2.37359600  | -1.36185900 | 1.88785700  |
| C  | 0.75879000  | -0.74449900 | 0.71459300  |
| H  | 0.12384200  | -0.45595800 | 1.55002400  |
| C  | 1.55156000  | 0.48741500  | 0.21896300  |
| C  | -0.08861500 | -1.42141900 | -0.36089000 |
| H  | 2.27503700  | 0.69307300  | 1.01508400  |
| C  | 2.31473200  | 0.21500800  | -1.07631200 |
| C  | 0.64538300  | 1.71938200  | 0.10637000  |
| O  | 0.33321400  | -2.40782500 | -0.94324300 |
| H  | 1.62585200  | 0.06377000  | -1.91027900 |
| H  | 2.95429400  | 1.06260300  | -1.31833700 |
| H  | 2.95995600  | -0.66221500 | -1.00540600 |
| H  | 0.00797800  | 1.76867600  | 0.99736100  |
| H  | -0.01508700 | 1.59890300  | -0.75892900 |
| C  | 1.40810100  | 3.03250300  | -0.02608000 |
| H  | 1.99316600  | 3.07117200  | -0.94570200 |
| H  | 0.71347300  | 3.87399300  | -0.04200700 |
| H  | 2.08939500  | 3.17515000  | 0.81586300  |
| O  | -1.25757300 | -0.90676000 | -0.64150500 |
| Ni | -2.30680400 | 0.39886700  | 0.14509700  |

## Molecule: Zn-ILE-02

|    |             |             |             |
|----|-------------|-------------|-------------|
| N  | 1.58486000  | -1.76692000 | 1.32908400  |
| H  | 2.20349400  | -2.18491000 | 0.62984600  |
| H  | 1.02463700  | -2.52173700 | 1.73028000  |
| H  | 2.15109600  | -1.35086200 | 2.07172200  |
| C  | 0.70494000  | -0.73395400 | 0.69663000  |
| H  | -0.03125600 | -0.45666500 | 1.44940600  |
| C  | 1.53863400  | 0.50682500  | 0.31514300  |
| C  | -0.00575100 | -1.38786300 | -0.49141000 |
| H  | 2.10291900  | 0.76117600  | 1.21906600  |
| C  | 2.53262600  | 0.22918700  | -0.81247100 |
| C  | 0.62548200  | 1.69700100  | -0.00287300 |
| O  | 0.53482900  | -2.34009800 | -1.05839300 |
| H  | 2.01587800  | 0.04320000  | -1.75616200 |
| H  | 3.18825900  | 1.08753700  | -0.95117900 |
| H  | 3.17219500  | -0.62918000 | -0.60032700 |
| H  | -0.14126100 | 1.76949500  | 0.77743000  |
| H  | 0.10079600  | 1.50564100  | -0.94215600 |
| C  | 1.36672300  | 3.02506800  | -0.10007500 |
| H  | 2.07578500  | 3.03228500  | -0.92892600 |
| H  | 0.66303300  | 3.84327800  | -0.26328100 |
| H  | 1.91976500  | 3.23616900  | 0.81830600  |
| O  | -1.12953800 | -0.88503700 | -0.86217100 |
| Zn | -2.24525400 | 0.33388400  | 0.17257500  |
